# Supplementary material for: Diels–Alder reaction of tetraarylcyclopentadienones with benzo[b]thiophene S,S-dioxides: an unprecedented de-oxygenation vs. sulfur dioxide extrusion
Source: Royal Society of Chemistry journal article supplement (doi:10.1039/d0cc05842d), 2020-01-01
Supplement: d0cc05842d1.pdf [file d0cc05842d1.pdf]

# **Diels-Alder Reaction of Tetraarylcyclopentadienones with Benzo[*b*]thiophene *S,S*-dioxides: An Unprecedented De-Oxygenation Vs Sulfur Dioxide Extrusion**

Palani Manikandan,<sup>a</sup> Jayachandran Karunakaran,<sup>a</sup> Elumalai Varathan,<sup>b</sup> Georg Schreckenbach,<sup>b</sup> and Arasambattu K Mohanakrishnan\*

## **Table of contents:**

|                                                                                                                                 |                  |
|---------------------------------------------------------------------------------------------------------------------------------|------------------|
| <b>1. Scheme 1 (Synthetic transformation of benzothiophene dioxides)....</b>                                                    | <b>S2</b>        |
| <b>2. Experimental Procedures and Analytical data .....</b>                                                                     | <b>S3-S52</b>    |
| <b>3. References.....</b>                                                                                                       | <b>S53</b>       |
| <b>4. NMR &amp; HRMS (selected) spectra .....</b>                                                                               | <b>S54-S190</b>  |
| <b>5. X-Ray Structure &amp; Crystallographic data of 3e,4a and 4c.....</b>                                                      | <b>S191-S196</b> |
| <b>6. Computational studies.....</b>                                                                                            | <b>S197-S200</b> |
| <b>7. UV-vis/Fluorescence spectra and photophysical data of 3a, 3e, 3f<br/>3i, 4a, 4c, 4f, 7, 10b, 12, 3a'' &amp; 3a' .....</b> | <b>S201-S204</b> |

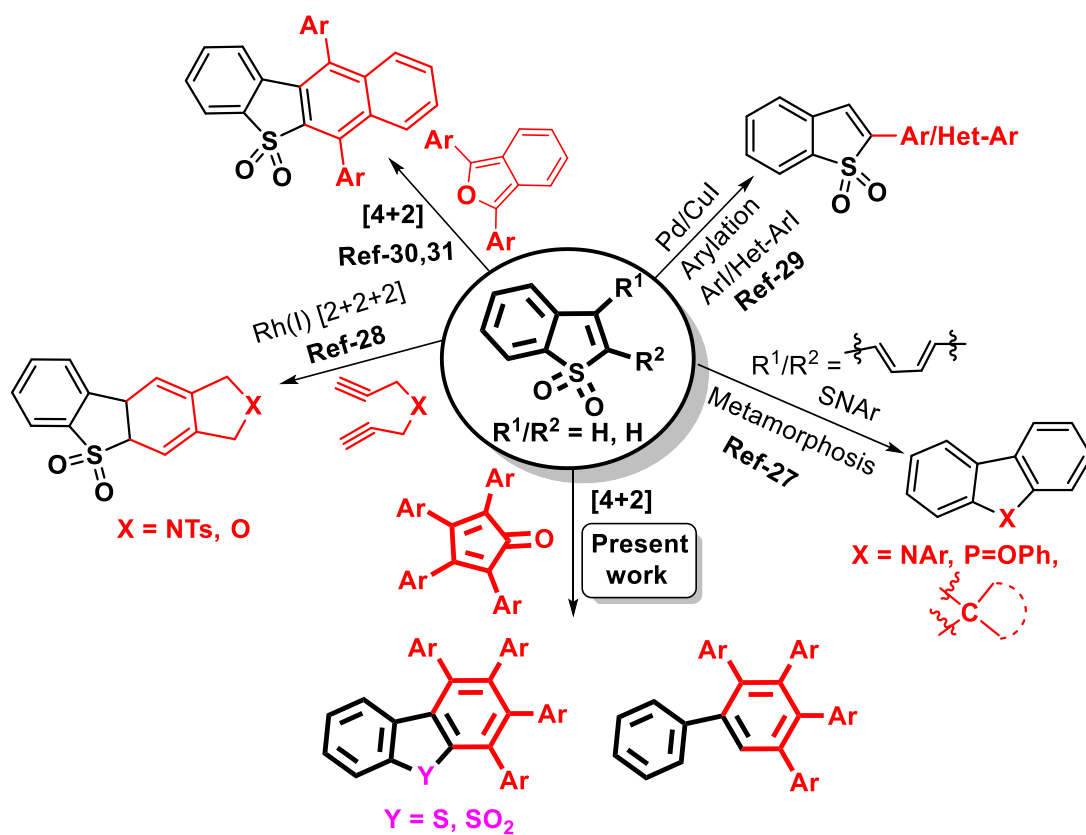

**Scheme 1** Synthetic Transformations of Benzothiophene dioxides

## 2. Experimental Section

### General

All melting points were uncorrected. Solvents were dried by standard procedures. All the experiments carried out under the nitrogen atmosphere unless otherwise stated. The progression of all the reaction was monitored by TLC using hexanes/ethyl acetate mixture. Column chromatography was carried out on Silica gel (230-400 mesh, Merck) by increasing polarity.  $^1\text{H}$ ,  $^{13}\text{C}$  and DEPT 135 spectra were recorded in  $\text{CDCl}_3$  using TMS as an internal standard on Bruker 300 MHz spectrometer at room temperature. Chemical shift values were quoted in parts per million (ppm) and coupling constants were quoted in hertz (Hz). HRMS were recorded on Xevo G2S QToF (ESI) instruments. UV/Vis spectra were recorded on an Agilent 8453 UV/Vis spectrometer. Hitachi F-700 fluorescence spectrophotometer was used for fluorescence spectra measurements. The required cyclopentadienones **1a-i**<sup>[1,2]</sup> were prepared adopting the established procedure *via* condensation of benzil, 4,4'-dimethoxybenzil and acenaphthoquinone with substituted acetone. The dienophiles, benzo[*b*]thiophene dioxides **2a-e**, **5** and **10** were prepared as per the published procedures.<sup>[3]</sup>

### 1,2,3,4-Tetraphenyldibenzo[*b,d*]thiophene **3a**

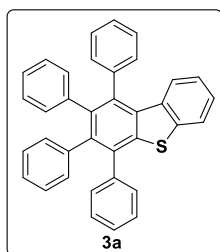

To a solution of cyclopentadienone **1a** (0.23 g, 0.59 mmol) in xylenes (10 mL), benzo[*b*]thiophene *S,S*-dioxide **2a** (0.10 g, 0.60 mmol) was added and refluxed for 16 h. Subsequent removal of solvent followed by column chromatographic purification on silica gel afforded dibenzothiophene **3a** (0.21 g, 71%) as a colorless solid.  $R_f$  = 0.30 (eluent: 100% hexane); mp 235-237 °C;  $^1\text{H}$ -NMR (300 MHz,  $\text{CDCl}_3$ ):  $\delta$  7.71 (d,  $J$  = 7.8 Hz, 1H, ArH), 7.35-7.20 (m, 11H, ArH), 7.02-6.96 (m, 1H, ArH), 6.87-6.81 (m, 10H, ArH), 6.63 (d,  $J$  = 9.0 Hz, 1H, ArH) ppm;  $^{13}\text{C}$ -NMR (75 MHz,  $\text{CDCl}_3$ ):  $\delta$  140.6, 140.2, 140.0, 139.9, 139.8, 139.1, 138.9, 137.4, 136.4, 135.3, 132.5, 131.6, 131.4, 130.4, 130.1, 128.2, 128.0, 127.2, 127.0, 126.7, 126.5, 125.6, 125.4, 125.2, 123.8, 122.3 ppm; DEPT-135 NMR (75 MHz,  $\text{CDCl}_3$ ):  $\delta$  131.6, 131.4, 130.3, 130.1, 128.2, 128.0, 127.2, 127.0, 126.7, 126.5, 125.9, 125.6, 125.4, 125.2, 123.7, 122.3 ppm; HRMS (ESI):  $m/z$  Calcd for  $\text{C}_{36}\text{H}_{24}\text{S}$   $[\text{M}+\text{H}]^+$ : 489.1677, Found 489.1678.

### 1,4-Bis(4-methoxyphenyl)-2,3-diphenyldibenzo[*b,d*]thiophene **3b**

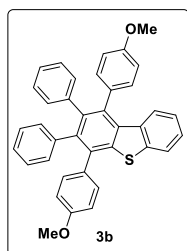

To a solution of cyclopentadienone **1b** (0.26 g, 0.59 mmol) in xylenes (10 mL), benzo[*b*]thiophene *S,S*-dioxide **2a** (0.10 g, 0.60 mmol) was added and refluxed for 16 h. Subsequent removal of solvent followed by column chromatographic purification on silica gel afforded pentaarylbenzene **3b** (0.19 g, 69%) as a green solid.  $R_f$  = 0.20 (eluent: 10% ethyl acetate in hexane); mp 260-262 °C;  $^1\text{H-NMR}$  (300 MHz,  $\text{CDCl}_3$ ):  $\delta$  7.76 (d,  $J$  = 7.8 Hz, 1H, ArH), 7.35-7.27 (m, 3H, ArH), 7.17 (d,  $J$  = 8.4 Hz, 2H, ArH), 7.07 (t,  $J$  = 7.6 Hz, 1H, ArH), 6.92-6.78 (m, 15H, ArH), 3.84 (s, 3H,  $\text{OCH}_3$ ), 3.81 (s, 3H,  $\text{OCH}_3$ ) ppm;  $^{13}\text{C-NMR}$  (75 MHz,  $\text{CDCl}_3$ ):  $\delta$  158.74, 158.66, 141.0, 140.6, 140.1, 139.6, 139.1, 137.0, 136.7, 134.9, 132.9, 132.7, 132.4, 131.61, 131.56, 131.5, 131.4, 131.3, 126.8, 126.6, 125.9, 125.5, 125.31, 125.29, 123.8, 122.3, 113.8, 113.6, 55.2, 55.1 ppm; DEPT-135 NMR (75 MHz,  $\text{CDCl}_3$ ):  $\delta$  131.6, 131.4, 131.3, 131.2, 126.7, 126.5, 125.5, 125.3, 125.2, 123.7, 122.2, 113.8, 113.5, 55.2, 55.1 ppm; HRMS (ESI):  $m/z$  Calcd for  $\text{C}_{38}\text{H}_{28}\text{O}_2\text{S}$   $[\text{M}+\text{H}]^+$ : 549.1888, Found 549.1887

### 2,3-Bis(4-methoxyphenyl)-1,4-diphenyldibenzo[*b,d*]thiophene **3c**

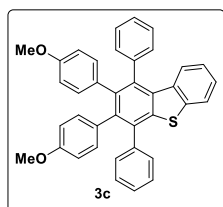

To a solution of cyclopentadienone **1c** (0.26 g, 0.58 mmol) in xylenes (10 mL), benzo[*b*]thiophene *S,S*-dioxide **2a** (0.10 g, 0.60 mmol) was added and refluxed for 16 h. Subsequent removal of solvent followed by column chromatographic purification on silica gel afforded dibenzothiophene **3c** (0.21 g, 72%) as a colorless solid.  $R_f$  = 0.15 (eluent: 10% ethyl acetate in hexane); mp 260-262 °C;  $^1\text{H-NMR}$  (300 MHz,  $\text{CDCl}_3$ ):  $\delta$  7.70 (d,  $J$  = 7.8 Hz, 1H, ArH), 7.33-7.20 (m, 11H, ArH), 7.01-6.95 (m, 1H, ArH), 6.78-6.61 (m, 4H, ArH), 6.60 (d,  $J$  = 9.0 Hz, 1H, ArH), 6.45-6.42 (m, 4H, ArH), 3.61 (s, 6H,  $\text{OCH}_3$ ) ppm;  $^{13}\text{C-NMR}$  (75 MHz,  $\text{CDCl}_3$ ):  $\delta$  157.4, 157.2, 140.5, 140.4, 140.3, 138.9, 137.7, 136.4, 135.5, 132.5, 132.4, 130.3, 130.1, 128.2, 128.0, 127.5, 127.1, 126.9, 125.8, 125.1, 123.6, 122.2, 112.4, 112.2, 54.8 ( $\text{OCH}_3$ ) ppm; DEPT-135 NMR (75 MHz,  $\text{CDCl}_3$ ):  $\delta$  132.5, 132.4, 130.3, 130.1, 128.2, 128.0, 127.1,



126.9, 125.8, 125.1, 123.6, 122.2, 112.4, 112.2 ppm; HRMS (ESI):  $m/z$  Calcd for  $C_{38}H_{28}O_2S$   $[M+H]^+$ : 549.1888, Found 549.1883.

### 1,2,3,4-Tetrakis(4-methoxyphenyl)dibenzo[*b,d*]thiophene **3d**

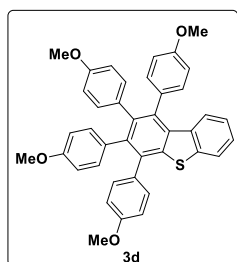

To a solution of cyclopentadienone **1d** (0.28 g, 0.56 mmol) in xylenes (10 mL), benzo[*b*]thiophene *S,S*-dioxide **2a** (0.10 g, 0.60 mmol) was added and refluxed for 16 h. Subsequent removal of solvent followed by column chromatographic purification on silica gel afforded dibenzothiophene **3d** (0.17 g, 64%) as a colorless solid.  $R_f$  = 0.28 (eluent: 15% ethyl acetate in hexane); mp 278-280 °C;  $^1H$ -NMR (300 MHz,  $CDCl_3$ ):  $\delta$  7.62 (d,  $J$  = 7.8 Hz, 1H, ArH), 7.21-7.13 (m, 3H, ArH), 7.03 (d,  $J$  = 8.7 Hz, 2H, ArH), 6.94 (t,  $J$  = 7.8 Hz, 1H, ArH), 6.77-6.62 (m, 10H, ArH), 6.39-6.35 (m, 3H, ArH), 3.73 (s, 3H,  $OCH_3$ ), 3.70 (s, 3H,  $OCH_3$ ), 3.54 (s, 6H,  $OCH_3$ ) ppm;  $^{13}C$ -NMR (75 MHz,  $CDCl_3$ ):  $\delta$  158.6, 158.5, 157.3, 157.1, 140.7, 140.4, 139.4, 139.0, 137.3, 136.6, 135.0, 132.9, 132.73, 132.68, 132.63, 132.60, 132.5, 132.4, 131.3, 131.2, 125.7, 125.2, 123.6, 122.2, 113.8, 113.6, 112.4, 112.2, 55.16 ( $OCH_3$ ), 55.09 ( $OCH_3$ ), 54.9 ( $OCH_3$ ) ppm; DEPT-135 NMR (75 MHz,  $CDCl_3$ ):  $\delta$  132.5, 132.4, 131.3, 131.2, 125.7, 125.2, 123.6, 122.2, 113.8, 113.6, 112.4, 112.2, 55.2, 55.1, 55.0 ppm; HRMS (ESI):  $m/z$  Calcd for  $C_{40}H_{34}O_4S$   $[M+H]^+$ : 609.2100, Found 609.2081.

### 7,13-Diphenylbenzo[*d*]fluorantheno[8,9-*b*]thiophene **3e**

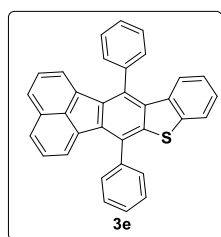

To a solution of cyclopentadienone **1g** in xylenes (10 mL), benzo[*b*]thiophene *S,S*-dioxide **2a** (0.10 g, 0.60 mmol) was added and refluxed for 16 h. Subsequent removal of solvent followed by column chromatographic purification on silica gel afforded dibenzothiophene **3e** (0.22 g, 67%) as a green solid.  $R_f$  = 0.30 (eluent: 5% ethyl acetate in hexane); mp 249-251 °C;  $^1H$ -NMR (300 MHz,  $CDCl_3$ ):  $\delta$  7.71-7.69 (m, 8H, ArH), 7.66-7.59 (m, 5H, ArH), 7.36-7.28 (m, 2H, ArH), 7.27-7.21 (m, 1H, ArH), 7.08-7.02 (m, 1H, ArH), 6.96-6.87 (m, 2H, ArH), 6.51 (d,  $J$  = 7.2 Hz, 1H, ArH) ppm;  $^{13}C$ -NMR (75 MHz,  $CDCl_3$ ):  $\delta$  141.1, 140.6, 139.5, 138.9, 136.7, 136.6, 135.8,

135.8, 135.2, 134.1, 133.9, 132.5, 132.1, 129.9, 129.5, 129.3, 129.2, 128.7, 128.5, 127.9, 127.7, 126.6, 126.1, 125.8, 124.9, 124.1, 122.7, 122.6 ppm; DEPT-135 NMR (75 MHz, CDCl<sub>3</sub>):  $\delta$  129.9, 129.4, 129.3, 129.2, 128.7, 128.5, 127.9, 127.7, 126.6, 126.1, 125.8, 124.9, 124.1, 122.7, 122.6 ppm; HRMS (ESI):  $m/z$  Calcd for C<sub>34</sub>H<sub>20</sub>S[M+H]<sup>+</sup>: 461.1364, Found 461.1358.

### 7,13-Bis(4-bromophenyl)benzo[*d*]fluoranthene[8,9-*b*]thiophene **3f**

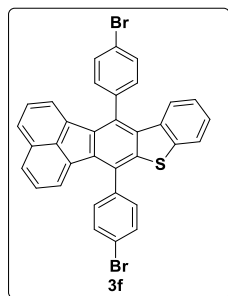

To a solution of cyclopentadienone **1g** (0.30 g, 0.58 mmol) in xylenes (10 mL), benzo[*b*]thiophene *S,S*-dioxide **2a** (0.10 g, 0.60 mmol) was added and refluxed for 16 h. Subsequent removal of solvent followed by column chromatographic purification on silica gel afforded dibenzothiophene **3f** (0.26 g, 70%) as a green solid.  $R_f$  = 0.30 (eluent: 10% ethyl acetate in hexane); mp 285-287 °C; <sup>1</sup>H-NMR (300 MHz, CDCl<sub>3</sub>):  $\delta$  7.88 (d,  $J$  = 8.4 Hz, 2H, ArH), 7.81 (d,  $J$  = 8.4 Hz, 2H, ArH), 7.77-7.72 (m, 3H, ArH), 7.63-7.56 (m, 2H, ArH), 7.50 (d,  $J$  = 8.1 Hz, 2H, ArH), 7.42-7.30 (m, 3H, ArH), 7.16-7.11 (m, 1H, ArH),  $\delta$  7.00 (d,  $J$  = 7.2 Hz, 1H, ArH), 6.92 (d,  $J$  = 8.1 Hz, 1H, ArH), 6.57 (d,  $J$  = 7.2 Hz, 1H, ArH) ppm; <sup>13</sup>C-NMR (75 MHz, CDCl<sub>3</sub>):  $\delta$  141.0, 140.6, 138.4, 137.7, 136.3, 136.2, 135.8, 135.5, 135.3, 133.9, 133.3, 132.9, 132.8, 132.4, 131.2, 131.1, 131.0, 130.0, 128.0, 127.8, 126.9, 126.4, 126.0, 124.7, 124.3, 123.1, 122.7 ppm; DEPT-135 NMR (75 MHz, CDCl<sub>3</sub>):  $\delta$  133.3, 132.8, 131.1, 127.9, 127.8, 126.9, 126.5, 126.1, 124.6, 124.3, 122.8, 122.7 ppm; HRMS (ESI):  $m/z$  Calcd for C<sub>34</sub>H<sub>18</sub>Br<sub>2</sub>S[M+H]<sup>+</sup>: 618.9554, Found 618.9572.

### 7,10-Bis(4-methoxyphenyl)-8-phenylfluoranthene **4a**

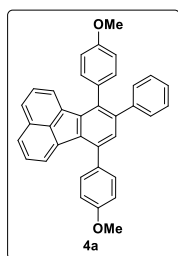

The fluoranthene **4a** (0.24 g, 77%) was prepared according to the general procedure using cyclopentadienone **1g** (0.25 g, 0.60 mmol) and benzo[*b*]thiophene *S,S*-dioxide **2a** (0.10 g, 0.60 mmol) as a green solid.  $R_f$  = 0.20 (eluent: 10% ethyl acetate in hexane); mp 223-226 °C; <sup>1</sup>H-NMR (300 MHz, CDCl<sub>3</sub>):  $\delta$  7.66-7.59 (m, 1H, ArH), 7.53 (d,  $J$  = 8.7 Hz, 2H, ArH), 7.42 (d,  $J$  =

8.4 Hz, 2H, ArH), 7.30-7.20 (m, 5H, ArH), 7.04-6.89 (m, 3H, ArH), 6.53 (d,  $J = 7.2$  Hz, 1H, ArH), 3.94 (s, 3H, OCH<sub>3</sub>), 3.89 (s, 3H, OCH<sub>3</sub>) ppm; <sup>13</sup>C-NMR (75 MHz, CDCl<sub>3</sub>):  $\delta$  159.8, 159.7, 141.6, 140.6, 136.84, 136.76, 136.2, 136.0, 135.4, 133.9, 133.8, 132.9, 131.8, 131.7, 131.1, 130.5, 130.3, 127.9, 127.7, 126.5, 126.0, 125.7, 124.9, 124.0, 122.70, 122.67, 122.5, 115.3, 114.8, 55.5 (OCH<sub>3</sub>), 55.4 (OCH<sub>3</sub>) ppm; DEPT-135 NMR (75 MHz, CDCl<sub>3</sub>):  $\delta$  130.5, 130.3, 127.9, 127.7, 126.5, 126.0, 125.7, 124.9, 124.0, 122.70, 122.67, 122.5, 115.3, 114.8, 55.5, 55.4 ppm; HRMS (ESI):  $m/z$  Calcd for C<sub>36</sub>H<sub>26</sub>O<sub>2</sub> [M+H]<sup>+</sup>: 491.2011, Found 491.2026.

### 7,10-Bis(3,4-dimethoxyphenyl)-8-phenylfluoranthene **4b**

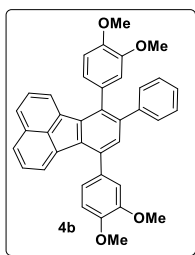

The fluoranthene **4b** (0.26 g, 76 %) was prepared according to the general procedure using cyclopentadienone **1h** (0.30 g, 0.60 mmol) and benzo[*b*]thiophene *S,S*-dioxide **2a** (0.10 g, 0.60 mmol) as a green solid.  $R_f = 0.30$  (eluent: 15% ethyl acetate in hexane); mp 178-200 °C; <sup>1</sup>H-NMR (300 MHz, CDCl<sub>3</sub>):  $\delta$  7.90 (d,  $J = 7.8$  Hz, 1H, ArH), 7.80 (d,  $J = 7.5$  Hz, 2H, ArH), 7.64 (d,  $J = 7.5$  Hz, 1H, ArH), 7.56-7.47 (m, 4H, ArH), 7.45-7.37 (m, 5H, ArH), 7.31 (s, 1H, ArH), 7.25-7.22 (m, 2H, ArH), 7.10-7.07 (m, 2H, ArH), 4.06 (s, 3H, OCH<sub>3</sub>), 4.01 (s, 3H, OCH<sub>3</sub>), 3.90 (s, 3H, OCH<sub>3</sub>), 3.72 (s, 3H, OCH<sub>3</sub>) ppm; <sup>13</sup>C-NMR (75 MHz, CDCl<sub>3</sub>):  $\delta$  150.9, 149.7, 149.5, 148.3, 139.8, 137.8, 136.2, 136.0, 135.7, 134.5, 133.5, 133.1, 131.0, 130.2, 129.9, 128.4, 127.9, 127.7, 127.65, 127.60, 124.1, 123.9, 122.8, 121.4, 119.7, 115.6, 112.9, 112.0, 103.2, 56.4 (OCH<sub>3</sub>), 56.3 (OCH<sub>3</sub>) ppm; DEPT-135 NMR (75 MHz, CDCl<sub>3</sub>):  $\delta$  130.8, 130.0, 129.8, 128.2, 127.7, 127.5, 127.5, 127.4, 123.9, 123.8, 121.3, 119.6, 115.4, 112.7, 111.8, 102.9, 56.2, 56.1 ppm; HRMS (ESI):  $m/z$  Calcd for C<sub>38</sub>H<sub>30</sub>O<sub>4</sub> [M+H]<sup>+</sup>: 551.2222, Found 551.2236.

### 2,2'-(8-Phenylfluorathene-7,10-diyl)dithiophene **4c**

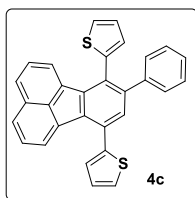

The fluoranthene **4c** (0.21 g, 67%) was prepared according to the general procedure using cyclopentadienone **1i** (0.22 g, 0.60 mmol) and benzo[*b*]thiophene *S,S*-dioxide **2a** (0.10 g, 0.60 mmol) as a green solid.  $R_f = 0.25$  (eluent: 15% ethyl acetate in hexane); mp 243-245 °C; <sup>1</sup>H-NMR (300 MHz, CDCl<sub>3</sub>):  $\delta$  7.73-7.69 (m, 2H, ArH), 7.47-7.42 (m, 2H, ArH), 7.39-7.37 (m, 1H,

ArH), 7.35-7.31 (m, 4H, ArH), 7.28-7.25 (m, 2H, ArH), 7.18-7.16 (m, 4H, ArH), 7.05-7.02 (m, 2H, ArH), 6.79 (d,  $J = 7.2$  Hz, 1H, ArH) ppm;  $^{13}\text{C}$ -NMR (75 MHz,  $\text{CDCl}_3$ ):  $\delta$  142.23, 141.25, 140.5, 140.2, 139.6, 136.9, 135.9, 135.4, 133.0, 131.9, 129.7, 129.1, 128.2, 127.8, 127.6, 127.3, 127.12, 127.08, 127.05, 126.9, 126.8, 126.4, 125.9, 123.5, 123.1 ppm; DEPT-135 NMR (75 MHz,  $\text{CDCl}_3$ ):  $\delta$  130.9, 128.5, 127.2, 126.8, 126.60, 126.58, 126.3, 126.1, 126.1, 126.0, 125.9, 125.8, 125.4, 124.9, 122.5, 122.1 ppm; HRMS (ESI):  $m/z$  Calcd for  $\text{C}_{30}\text{H}_{18}\text{S}_2$   $[\text{M}+\text{H}]^+$ : 443.0928, Found 443.0928.

### Control Experiments:

#### 1,2,3,4-Tetraphenyl-4a,9b-dihydrodibenzo[*b,d*]thiophene *S,S*-dioxide 5a

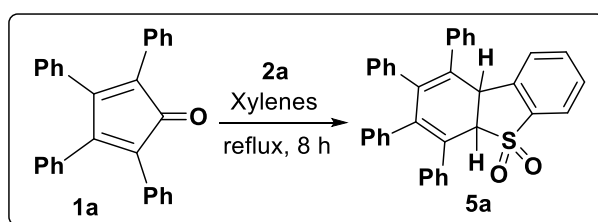

To a stirred solution of cyclopentadienone **1a** (0.23 g, 0.59 mmol) in dry xylenes (10 mL), benzo[*b*]thiophene *S,S*-dioxide **2a** (0.10 g, 0.60 mmol) was added and then the reaction mixture was refluxed for 8 h. The subsequent removal of solvent followed by column chromatographic purification on silica gel gave dihydrodibenzothienothiophene *S,S*-dioxide **5a** (0.24 g, 75%) as a colorless solid.  $R_f = 0.20$  (eluent: 10 % ethyl acetate in hexane); mp 165-167 °C;  $^1\text{H}$ -NMR (300 MHz,  $\text{CDCl}_3$ ):  $\delta$  7.82 (d,  $J = 7.5$  Hz, 1H, ArH), 7.40 (d,  $J = 7.5$  Hz, 2H, ArH), 7.32 (t,  $J = 7.8$  Hz, 1H, ArH), 7.18-7.08 (m, 4H, ArH), 6.97-6.96 (m, 3H, ArH), 6.90-6.86 (m, 5H, ArH), 6.73-6.61 (m, 8H, ArH), 5.01 (d,  $J = 8.7$  Hz, 1H, CH), 4.67 (d,  $J = 8.7$  Hz, 1H, CH) ppm;  $^{13}\text{C}$ -NMR (75 MHz,  $\text{CDCl}_3$ ):  $\delta$  143.4, 140.1, 139.2, 139.0, 138.7, 138.5, 138.1, 132.9, 132.0, 131.0, 130.5, 129.8, 129.6, 129.3, 128.4, 128.0, 127.6, 127.1, 126.9, 126.7, 126.5, 126.2, 125.6, 125.3, 121.5, 121.5, 69.2, 45.0 ppm; DEPT 135-NMR (75 MHz,  $\text{CDCl}_3$ ):  $\delta$  132.0, 131.0, 130.4, 129.8, 129.5, 129.2, 128.4, 127.9, 127.5, 127.1, 126.8, 126.7, 126.5, 126.2, 125.5, 121.4, 69.1, 44.9 ppm; HRMS (ESI):  $m/z$  calcd for  $\text{C}_{36}\text{H}_{26}\text{O}_2\text{S}$   $[\text{M}+\text{H}]^+$ : 523.1732, Found: 523.1726

#### 1,4-Bis(4-methoxyphenyl)-2,3-diphenyl-4a,9b-dihydrodibenzo[*b,d*]thiophene *S,S*-dioxide 5b

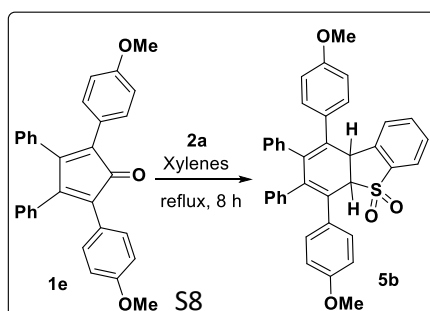

To a stirred solution of cyclopentadienone **1b** (0.26 g, 0.58 mmol) in dry xylenes (10 mL), benzo[*b*]thiophene *S,S*-dioxide **2a** (0.10 g, 0.60 mmol) was added and then the reaction mixture was refluxed for 8 h. The subsequent removal of solvent followed by column chromatographic purification on silica gel gave dihydrodibenzothiophene *S,S*-dioxide **5b** (0.21 g, 69 %) as a colorless solid.  $R_f = 0.20$  (eluent: 10 % ethyl acetate in hexane); mp 146-148 °C;  $^1\text{H-NMR}$  (300 MHz,  $\text{CDCl}_3$ ):  $\delta$  7.81 (d,  $J = 7.5$  Hz, 1H, ArH), 7.30 (m, 3H, ArH), 7.33 (t,  $J = 7.8$  Hz, 1H, ArH), 6.91-6.86 (m, 5H, ArH), 6.74-6.65 (m, 8H, ArH), 6.57 (d,  $J = 8.7$  Hz, 2H, CH), 6.50 (d,  $J = 9.0$  Hz, 2H, CH), 4.97 (d,  $J = 8.7$  Hz, 1H, CH), 4.66 (d,  $J = 8.7$  Hz, 1H, CH), 3.71 (s, 3H,  $\text{OCH}_3$ ), 3.64 (s, 3H,  $\text{OCH}_3$ ) ppm;  $^{13}\text{C-NMR}$  (75 MHz,  $\text{CDCl}_3$ ):  $\delta$  158.4, 158.2, 142.7, 139.6, 139.1, 138.8, 138.6, 138.5, 132.4, 132.2, 132.0, 131.3, 131.14, 131.06, 130.5, 130.4, 129.7, 128.3, 127.2, 126.7, 126.1, 125.4, 124.6, 121.4, 113.5, 113.2, 69.4, 55.10 ( $\text{OCH}_3$ ), 55.05 ( $\text{OCH}_3$ ), 45.0 ppm; DEPT 135-NMR (75 MHz,  $\text{CDCl}_3$ ):  $\delta$  132.0, 131.1, 131.0, 130.4, 130.3, 129.7, 128.3, 127.1, 126.6, 126.0, 125.3, 121.4, 113.4, 113.1, 69.3, 55.10, 55.05, 44.9 ppm; HRMS (ESI):  $m/z$  calcd for  $\text{C}_{38}\text{H}_{30}\text{O}_4\text{S}$   $[\text{M}+\text{H}]^+$ : 583.1865, Found: 583.1861.

#### Thermolysis of dihydrodibenzothiophene **5a** in *p*-xylene

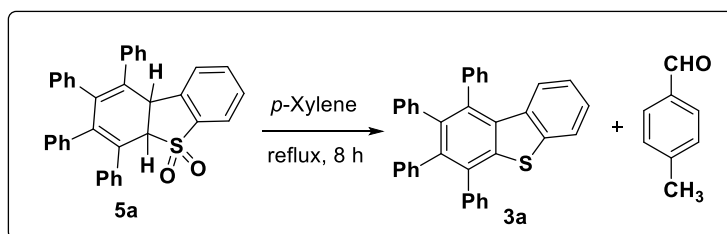

A solution of dihydrodibenzothiophene **5a** (0.1 g, 0.19 mmol) in *p*-xylene (10 mL) was refluxed for 8 h. The subsequent removal of solvent gave crude product. The crude product was analyzed by  $^1\text{H}$ ,  $^{13}\text{C}$  NMR and mass spectra.

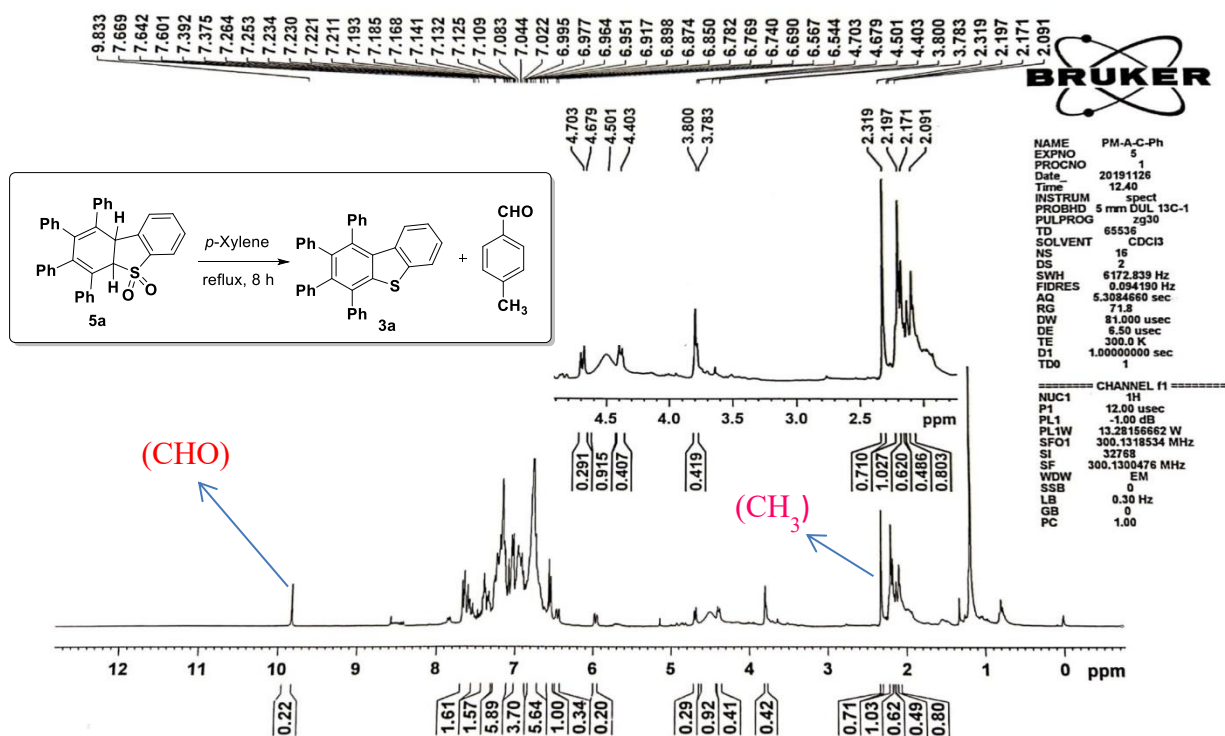

<sup>1</sup>H-NMR (300 MHz, CDCl<sub>3</sub>) spectrum of crude product

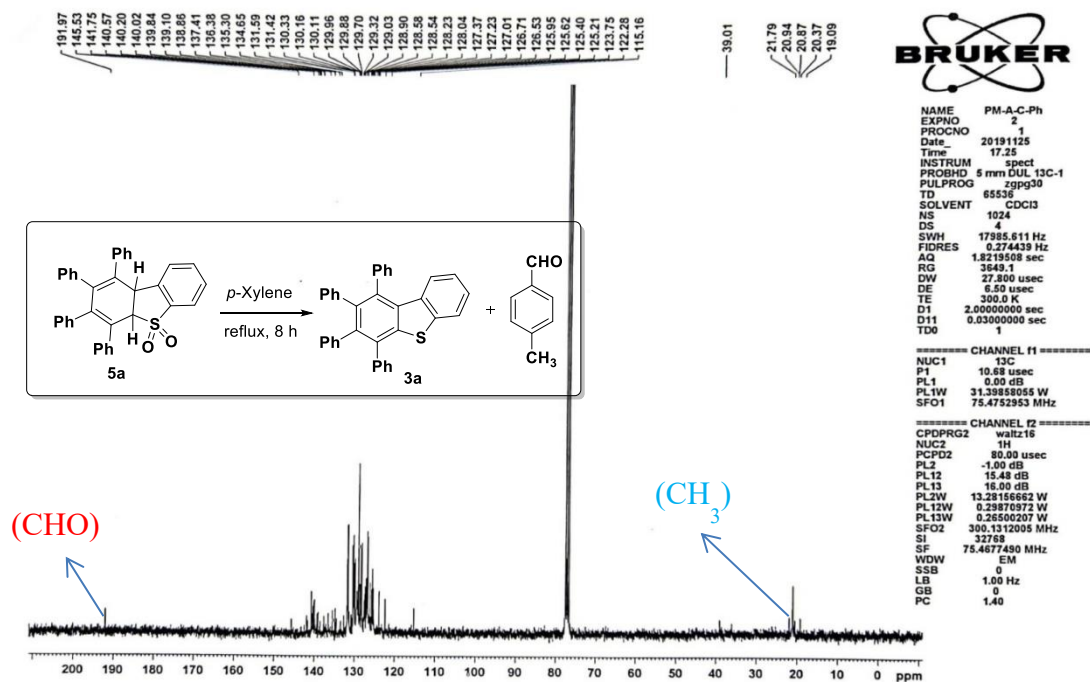

<sup>13</sup>C-NMR (75 MHz, CDCl<sub>3</sub>) spectrum of crude product

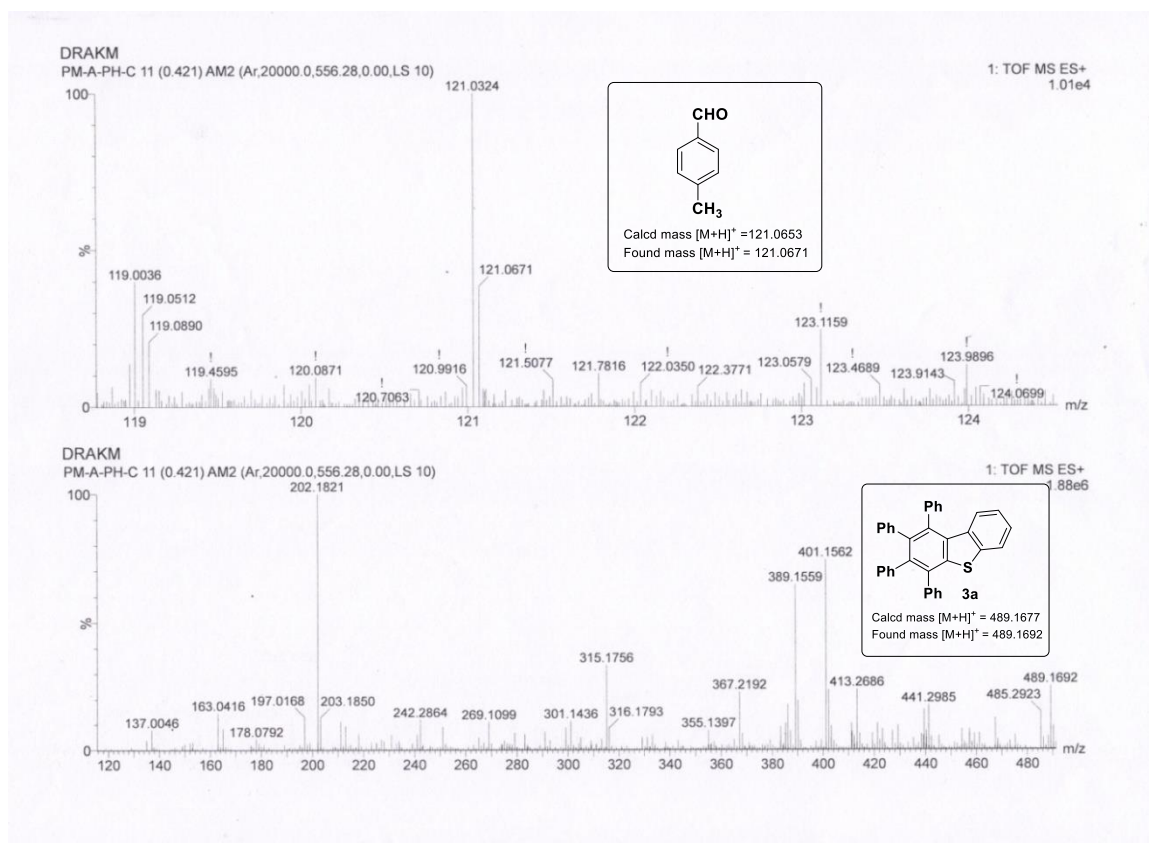

HRMS spectrum of crude product

### Thermolysis of dihydrodibenzothiophene **5b** in *p*-xylene

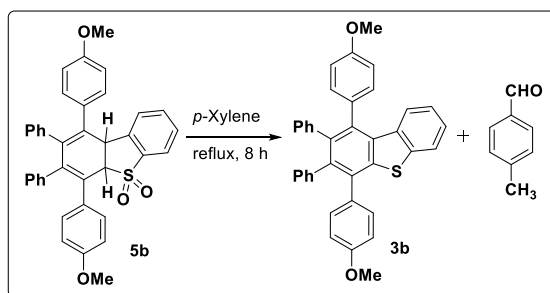

A solution of dihydrodibenzothiophene **5b** (0.1 g, 0.17 mmol) in *p*-xylene (10 mL) was refluxed for 8 h. The subsequent removal of solvent gave crude product. Then, the crude product was analyzed by  $^1\text{H}$ ,  $^{13}\text{C}$  NMR and mass spectra.

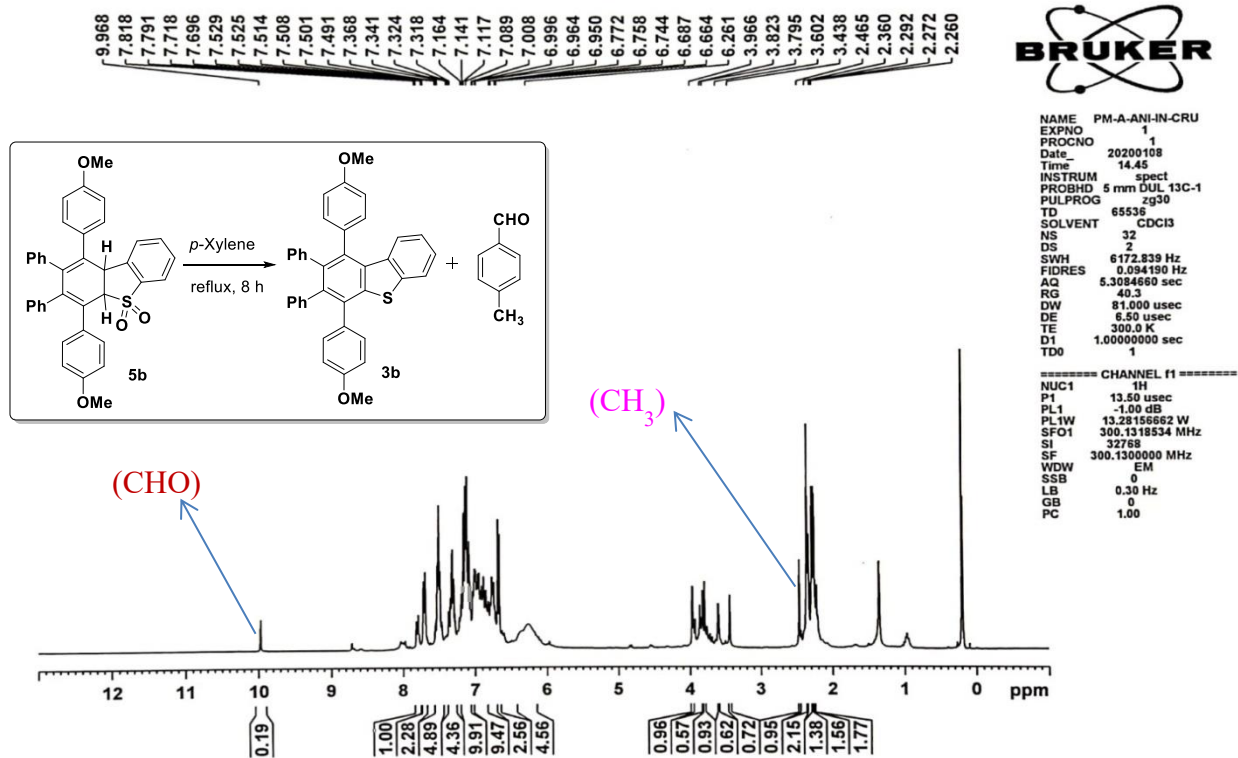

<sup>1</sup>H-NMR (300 MHz, CDCl<sub>3</sub>) spectrum of crude product

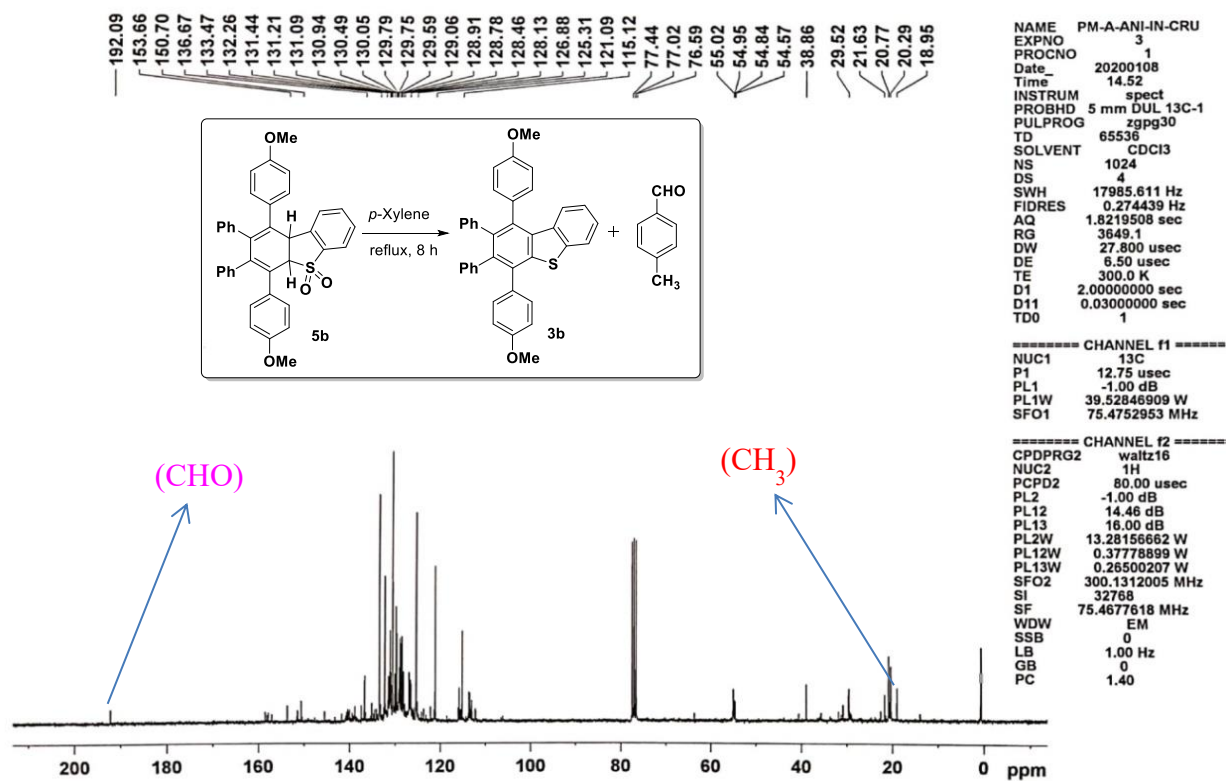

<sup>13</sup>C-NMR (75 MHz, CDCl<sub>3</sub>) spectrum of crude product



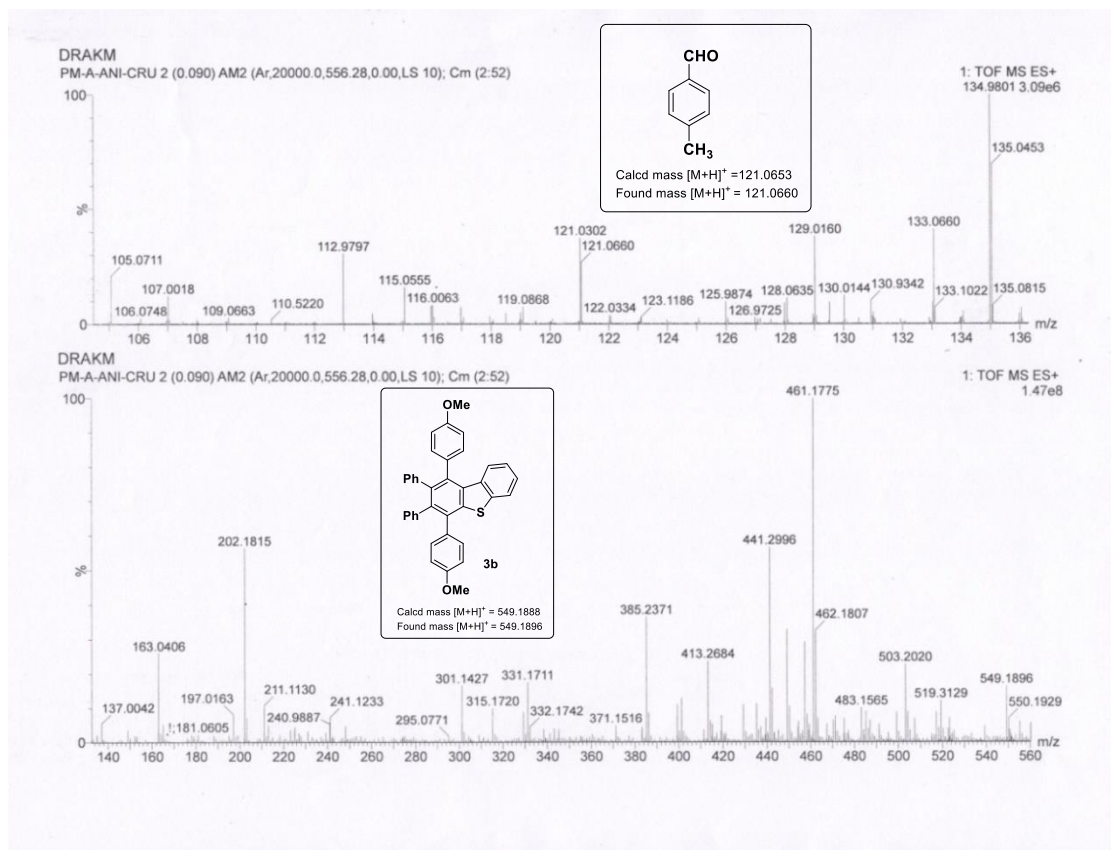

Mass spectrum of crude product

### Thermolysis of dihydrodibenzothiophene **5a** in the presence of diphenylmethane

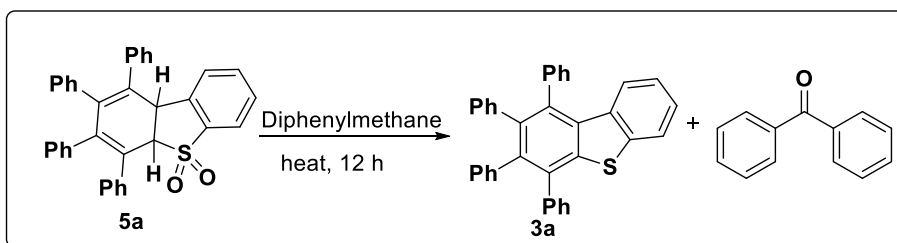

A stirred suspension of dihydrodibenzothiophene **5a** (0.1 g, 0.19 mmol) in diphenylmethane (2 mL) was heated at 130 °C for 12 h. The subsequent removal of unreacted diphenylmethane followed column chromatography (silica gel; EA/hexane, 9:1) gave a mixture dibenzothiophene and benzophenone as a colorless solid. The product mixture was analyzed by  $^1\text{H}$  and  $^{13}\text{C}$  NMR.

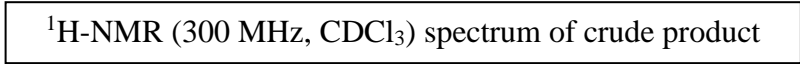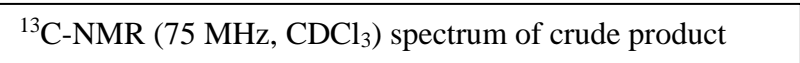

## Thermolysis of dihydrodibenzothiophene **5a** in the presence of fluorene

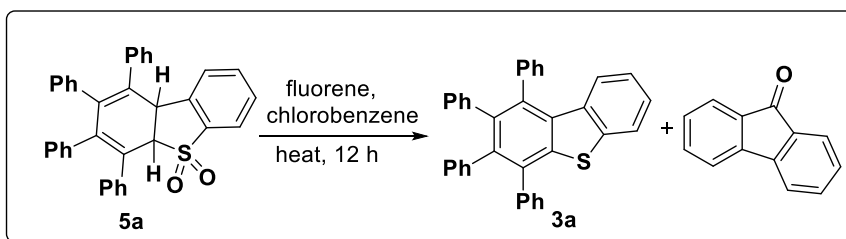

A stirred solution of dihydrodibenzothiophene **5a** (0.1 g, 0.19 mmol) and fluorene (0.1 g, 0.23 mmol) in chlorobenzene (2 mL) was refluxed for 12 h. The subsequent removal of solvent followed by column chromatography (silica gel; EA/hexane, 9:1) gave a mixture of dibenzothiophene and fluorenone as a colorless solid. The product was analyzed by  $^1\text{H}$  and  $^{13}\text{C}$  NMR.

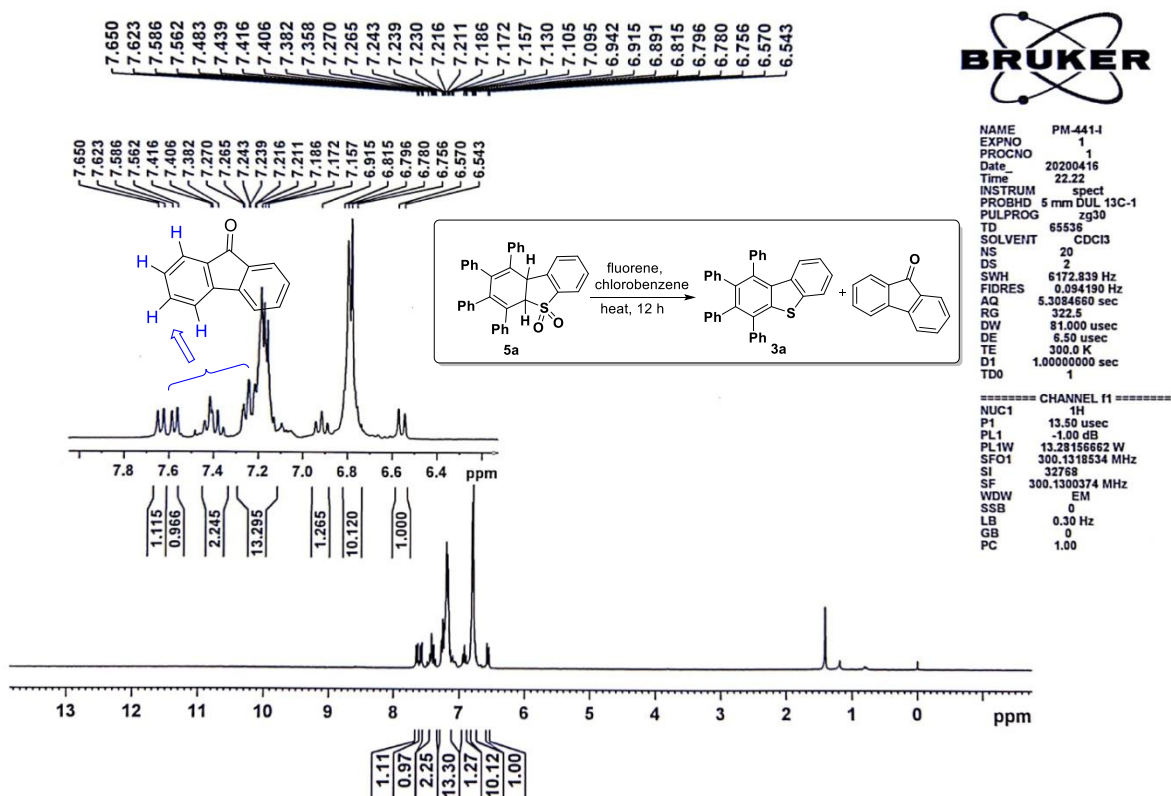

$^1\text{H}$ -NMR (300 MHz,  $\text{CDCl}_3$ ) spectrum of crude product

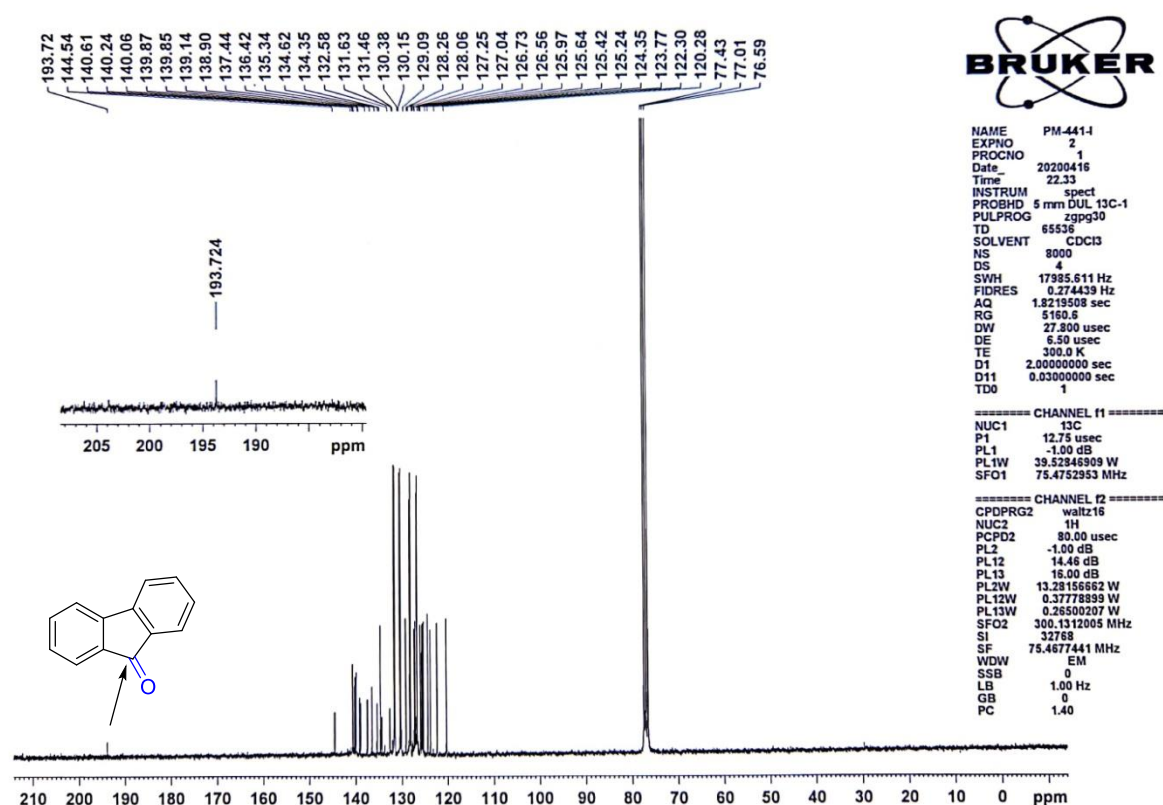

<sup>13</sup>C-NMR (75 MHz, CDCl<sub>3</sub>) spectrum of crude product

### 1,2,3,4-Tetraphenyldibenzo[*b,d*]thiophene *S,S*-dioxide **3a''**

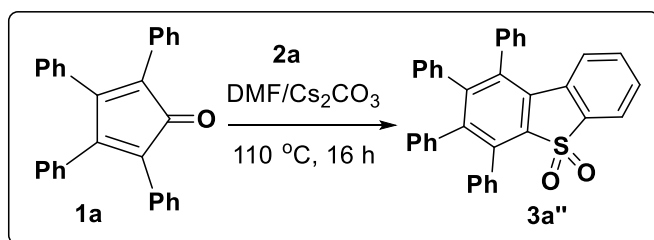

To a stirred solution of cyclopentadienone **1a** (0.23 g, 0.59 mmol), benzo[*b*]thiophene *S,S*-dioxide **2a** (0.10 g, 0.60 mmol) in DMF (15 mL), Cs<sub>2</sub>CO<sub>3</sub> (0.39 g, 1.19 mmol) was added. It was then heated at 110 °C for ~16 h. After completion of reaction (monitored by TLC), it was poured into crushed ice (10 g) and stirred for 10 min. The reaction mixture was then extracted with ethyl acetate (2 x 15 mL) and dried (Na<sub>2</sub>SO<sub>4</sub>). Subsequent removal of solvent followed by chromatographic purification on silica gel gave tetraphenyldibenzothiophene *S,S*-dioxide **3a''** (0.20 g, 66%) as a colorless solid. *R*<sub>f</sub> = 0.35 (eluent: 5% ethyl acetate in hexane); mp >300 °C; <sup>1</sup>H-NMR (300 MHz, CDCl<sub>3</sub>): δ 7.70 (d, *J* = 7.5 Hz, 1H, ArH), 7.36-7.31 (m, 3H, ArH), 7.28-

7.21 (m, 7H, ArH), 7.18-7.12 (m, 3H, ArH), 6.87-6.85 (m, 6H, ArH), 6.81-6.77 (m, 3H, ArH) 6.29-6.26 (m, 1H, ArH) ppm;  $^{13}\text{C}$ -NMR (75 MHz,  $\text{CDCl}_3$ ):  $\delta$  147.6, 144.2, 139.2, 138.6, 138.4, 138.4, 138.1, 137.8, 135.9, 134.3, 133.0, 131.4, 130.93, 130.88, 130.6, 129.9, 129.5, 128.8, 128.7, 127.9, 127.8, 127.3, 126.94, 126.88, 126.23, 126.17, 125.2, 121.7 ppm; DEPT-135 NMR (75 MHz,  $\text{CDCl}_3$ ):  $\delta$  132.9, 130.9, 130.8, 130.5, 129.9, 128.6, 127.9, 127.7, 127.2, 126.9, 126.8, 126.2, 126.1, 125.1, 121.6 ppm; HRMS (ESI):  $m/z$  Calcd for  $\text{C}_{36}\text{H}_{24}\text{O}_2\text{S}$   $[\text{M}+\text{H}]^+$ : 521.1575, Found 521.1582.

**1,4-Bis(4-methoxyphenyl)-2,3-diphenyldibenzo[*b,d*]thiophene *S,S*-dioxide **3b''****

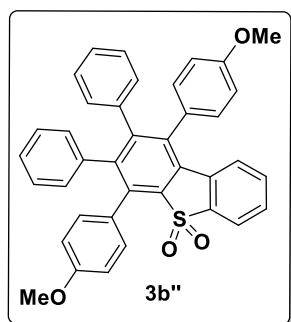

To a stirred solution of cyclopentadienone **1b** (0.25 g, 0.60 mmol), benzo[*b*]thiophene *S,S*-dioxide **2a** (0.10 g, 0.60 mmol) in DMF (15 mL),  $\text{Cs}_2\text{CO}_3$  (0.39 g, 1.19 mmol) was added. It was then heated at 110 °C for ~16 h. After completion of reaction (monitored by TLC), it was poured into crushed ice (10 g) and stirred for 10 min. The reaction mixture was then extracted with ethyl acetate (2 x 15 mL) and dried ( $\text{Na}_2\text{SO}_4$ ). Removal of solvent followed by chromatographic purification on silica gel gave dibenzothiophene *S,S*-dioxide **3b''** (0.23 g, 65%) as a colorless solid.  $R_f$  = 0.25 (eluent: 10% ethyl acetate in hexane); mp 232-235 °C;  $^1\text{H}$ -NMR (300 MHz,  $\text{CDCl}_3$ ):  $\delta$  7.63 (d,  $J$  = 7.5 Hz, 1H, ArH), 7.32-7.24 (m, 1H, ArH), 7.20-7.18 (m, 3H, ArH), 7.14-7.05 (m, 1H, ArH), 6.97 (d,  $J$  = 8.4 Hz, 2H, ArH), 6.81-6.77 (m, 5H, ArH), 6.75 (s, 1H, ArH), 6.72-6.67 (m, 7H, ArH), 6.31 (d,  $J$  = 8.1 Hz, 1H, ArH), 3.71 (s, 3H,  $\text{OCH}_3$ ), 3.3.67 (s, 3H,  $\text{OCH}_3$ ) ppm;  $^{13}\text{C}$ -NMR (75 MHz,  $\text{CDCl}_3$ ):  $\delta$  159.23, 159.21, 148.0, 144.5, 139.2, 138.6, 138.3, 138.1, 137.7, 136.1, 133.0, 132.1, 131.6, 131.0, 130.9, 130.6, 130.5, 129.4, 129.1, 127.0, 126.9, 126.6, 126.12, 126.07, 125.2, 121.6, 114.2, 112.9, 55.2 ( $\text{OCH}_3$ ), 55.0 ( $\text{OCH}_3$ ) ppm; DEPT-135 NMR (75 MHz,  $\text{CDCl}_3$ ):  $\delta$  133.0, 132.0, 130.9, 130.9, 130.5, 129.3, 126.9, 126.8, 126.12, 126.07, 125.1, 121.5, 114.1, 112.9, 55.2, 55.0 ppm; HRMS (ESI):  $m/z$  Calcd for  $\text{C}_{38}\text{H}_{28}\text{O}_4\text{S}$   $[\text{M}+\text{H}]^+$ : 581.1787, Found 581.1779.

**2,3-Bis(4-methoxyphenyl)-1,4-diphenyldibenzo[*b,d*]thiophene *S,S*-dioxide 3c''**

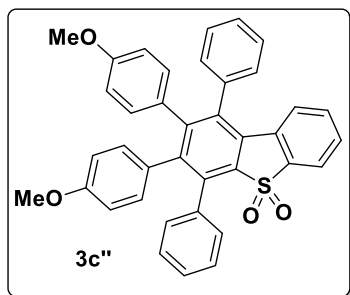

To a stirred solution of cyclopentadienone **1c** (0.25 g, 0.60 mmol), benzo[*b*]thiophene *S,S*-dioxide **2a** (0.10 g, 0.60 mmol) in DMF (15 mL), Cs<sub>2</sub>CO<sub>3</sub> (0.39 g, 1.19 mmol) was added. It was then heated at 110 °C for ~16 h. After completion of reaction (monitored by TLC), it was poured into crushed ice (10 g) and stirred for 10 min. The reaction mixture was then extracted with ethyl acetate (2 x 15 mL) and dried (Na<sub>2</sub>SO<sub>4</sub>). Subsequent removal of solvent followed by chromatographic purification on silica gel gave dibenzothiophene *S,S*-dioxide **3c''** (0.20 g, 71%) as a colorless solid. R<sub>f</sub> = 0.30 (eluent: 10% ethyl acetate in hexane); mp 258-260 °C; <sup>1</sup>H-NMR (300 MHz, CDCl<sub>3</sub>): δ 7.61 (d, *J* = 7.8 Hz, 1H, ArH), 7.25-7.23 (m, 2H, ArH), 7.21-7.19 (m, 4H, ArH), 7.18-7.15 (m, 3H, ArH), 7.09-7.06 (m, 3H, ArH), 6.63-6.58 (m, 4H, ArH), 6.37-6.34 (m, 4H, ArH), 6.16 (d, *J* = 8.1 Hz, 1H, ArH), 3.51 (s, 6H, OCH<sub>3</sub>) ppm; <sup>13</sup>C-NMR (75 MHz, CDCl<sub>3</sub>): δ 157.84, 157.78, 147.6, 144.3, 139.2, 138.8, 138.7, 138.5, 135.8, 134.6, 133.0, 132.1, 131.8, 131.6, 130.9, 130.5, 129.9, 129.4, 128.7, 128.6, 127.9, 127.8, 127.4, 125.2, 121.6, 112.7, 112.6, 55.0 (OCH<sub>3</sub>) ppm; DEPT-135 NMR (75 MHz, CDCl<sub>3</sub>): δ 132.9, 132.0, 131.6, 130.8, 129.9, 129.3, 128.6, 127.8, 127.6, 127.3, 125.1, 121.5, 112.6, 112.5, 55.9 ppm; HRMS (ESI): *m/z* Calcd for C<sub>38</sub>H<sub>28</sub>O<sub>4</sub>S [M+H]<sup>+</sup>: 581.1787, Found 581.1788.

### 3-Bromobenzothiophene

To a solution of benzothiophene (1 g, 7.46 mmol) in 1:2 AcOH/CHCl<sub>3</sub> (10:20 mL), NBS (1.59 g, 8.96 mmol) was added and stirred for 24 h at rt. The reaction mixture was then poured into cold water (100 mL), and then extracted using DCM (2 x 20 mL). The combined organic layer was washed with brine (30 mL) and dried (Na<sub>2</sub>SO<sub>4</sub>). Removal of solvent in *vacuo* followed by column chromatographic purification using hexane as the eluent gave 3-bromobenzothiophene (1.28 g, 81%) as a colorless liquid. <sup>1</sup>H-NMR (300 MHz, CDCl<sub>3</sub>): δ 8.08 (d, *J* = 8.1 Hz, 2H, ArH), 7.73-7.62 (m, 3H, ArH) ppm.

### 3-Bromobenzothiophene *S, S*-dioxide 2a'<sup>5</sup>

To a solution of 3-bromobenzothiophene (1 g, 4.69 mmol) in acetic acid (15 mL) was added 30% aqueous hydrogen peroxide (5 mL) and the mixture was heated for 1 h at 100 °C. The reaction

mixture was then poured into ice cold water and let stand overnight. The resulting solid was filtered and dried to afford 3-bromobenzothiophene *S*, *S*-dioxide (0.98 g, 85%) as a colorless solid; mp 181-182 °C; <sup>1</sup>H-NMR (300 MHz, CDCl<sub>3</sub>): δ 7.71 (d, *J* = 7.8 Hz, 1H, ArH), 7.66-7.60 (m, 2H, ArH), 7.55 (d, *J* = 7.8 Hz, 1H, ArH), 6.95 (s, 1H) ppm; <sup>13</sup>C-NMR (75 MHz, CDCl<sub>3</sub>): δ 137.4, 133.7, 131.6, 131.3, 129.9, 129.6, 124.7, 120.8 ppm.

#### Diels-Alder reaction of cyclopentadienone **1a** with 3-bromobenzothiophene *S*, *S*-dioxide **2a'**

To a solution of cyclopentadienone **1a** (0.23 g, 0.61 mmol) in xylenes (15 mL), 3-bromobenzo[*b*]thiophene *S*,*S*-dioxide **2a'** (0.15 g, 0.61 mmol) was added and refluxed for 24 h. Subsequent removal of solvent followed by column chromatographic purification on silica gel afforded tetraphenyldibenzothiophene *S*,*S*-dioxide **3a''** (0.16 g, 53%) as a colorless solid.

#### Diels-Alder reaction of cyclopentadienone **1b** with 3-bromobenzothiophene *S*, *S*-dioxide **2a'**

To a solution of cyclopentadienone **1b** (0.27 g, 0.61 mmol) in xylenes (15 mL), 3-bromobenzo[*b*]thiophene *S*,*S*-dioxide **2a'** (0.15 g, 0.61 mmol) was added and refluxed for 24 h. Subsequent removal of solvent followed by column chromatographic purification on silica gel afforded tetraphenyldibenzothiophene *S*,*S*-dioxide **3b''** (0.19 g, 55%) as a colorless solid.

#### Diels-Alder reaction of cyclopentadienone **1c** with 3-bromobenzothiophene *S*, *S*-dioxide **2a'**

To a solution of cyclopentadienone **1c** (0.27 g, 0.61 mmol) in xylenes (15 mL), 3-bromobenzo[*b*]thiophene *S*,*S*-dioxide **2a'** (0.15 g, 0.61 mmol) was added and refluxed for 24 h. Subsequent removal of solvent followed by column chromatographic purification on silica gel afforded tetraphenyldibenzothiophene *S*,*S*-dioxide **3c''** (0.17 g, 51%) as a colorless solid.

#### 1,2,3,4-Tetraphenyldibenzo[*b*, *d*]thiophene *S*-oxide **3a'**

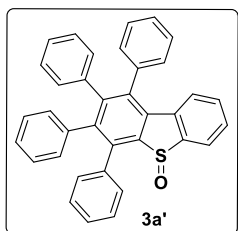

To a solution of dibenzothiophene **3a** (0.10 g, 0.20 mmol) in dry DCM (10 mL) and kept under N<sub>2</sub> at -10-0 °C, BF<sub>3</sub>·OEt<sub>2</sub> (0.23 mL, 1.63 mmol) was added.<sup>4</sup> The reaction mixture was then stirred and 77% *m*-CPBA (0.040, 0.24 mmol) was added in 3 portions over 1.5 h at the same temperature. The reaction was monitored by TLC, and after the disappearance of the starting material, saturated aq. Na<sub>2</sub>CO<sub>3</sub> (0.60 mL) was added to the mixture followed by solid K<sub>2</sub>CO<sub>3</sub>



(300 mg). The mixture was then filtered through a plug loaded with Na<sub>2</sub>SO<sub>4</sub>, K<sub>2</sub>CO<sub>3</sub> and Na<sub>2</sub>CO<sub>3</sub>. It was then washed with DCM (10 mL). Subsequent removal of DCM followed by column chromatographic purification on silica gel afforded dibenzothiophene *S*-oxide **3a'** (60 mg, 58%) as a colorless solid. *R*<sub>f</sub> = 0.20 (eluent: 25% ethyl acetate in hexane); mp 218-220 °C; <sup>1</sup>H-NMR (300 MHz, CDCl<sub>3</sub>): δ 7.82 (d, *J* = 7.5 Hz, 1H, ArH), 7.34-7.10 (m, 12H, ArH), 6.85-6.80 (m, 10H, ArH), 6.28 (d, *J* = 8.1 Hz, 1H, ArH) ppm; <sup>13</sup>C-NMR (75 MHz, CDCl<sub>3</sub>): δ 146.7, 145.9, 144.1, 142.4, 138.7, 138.5, 138.2, 137.8, 136.6, 134.5, 131.8, 130.74, 130.71, 130.0, 129.9, 128.8, 128.6, 128.4, 127.7, 127.5, 127.3, 126.9, 126.7, 126.04, 125.99, 125.6 ppm; DEPT-135 NMR (75 MHz, CDCl<sub>3</sub>): δ 131.8, 130.7, 130.7, 129.96, 129.89, 128.8, 128.6, 128.4, 127.6, 127.5, 127.3, 126.8, 126.7, 126.04, 125.99, 125.5 ppm; HRMS (ESI): *m/z* Calcd for C<sub>36</sub>H<sub>24</sub>OS [M+H]<sup>+</sup>: 505.1626, Found 505.1649.

TLC picture of dibenzothiophene **3a**, sulfone **3a''** and sulfoxide **3a'**

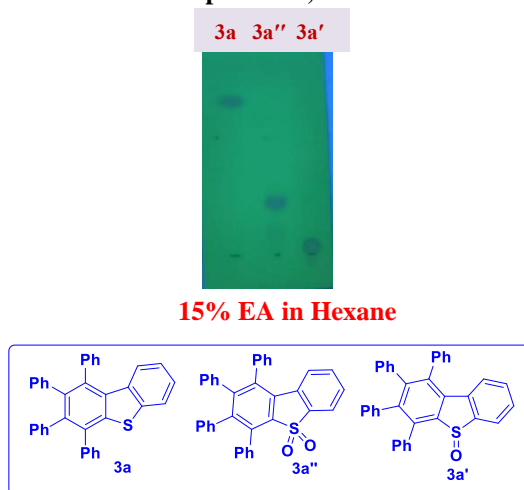

**Diels-Alder reaction of 7,9-diphenyl-8*H*-cyclopenta[*a*]acenaphthylen-8-one **1e** with benzo[*b*]thiophene *S,S*-dioxide **2a** in *p*-xylene**

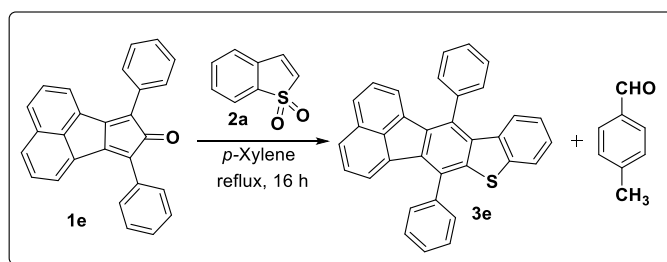

To a solution of cyclopentadienone **1e** (0.20 g, 0.56 mmol) in *p*-xylene (10 mL), benzo[*b*]thiophene *S,S*-dioxide **2a** (0.10 g, 0.60 mmol) was added and refluxed for 16 h. The subsequent removal of solvent gave crude product. The crude product was analyzed by <sup>1</sup>H, <sup>13</sup>C NMR and mass spectra.



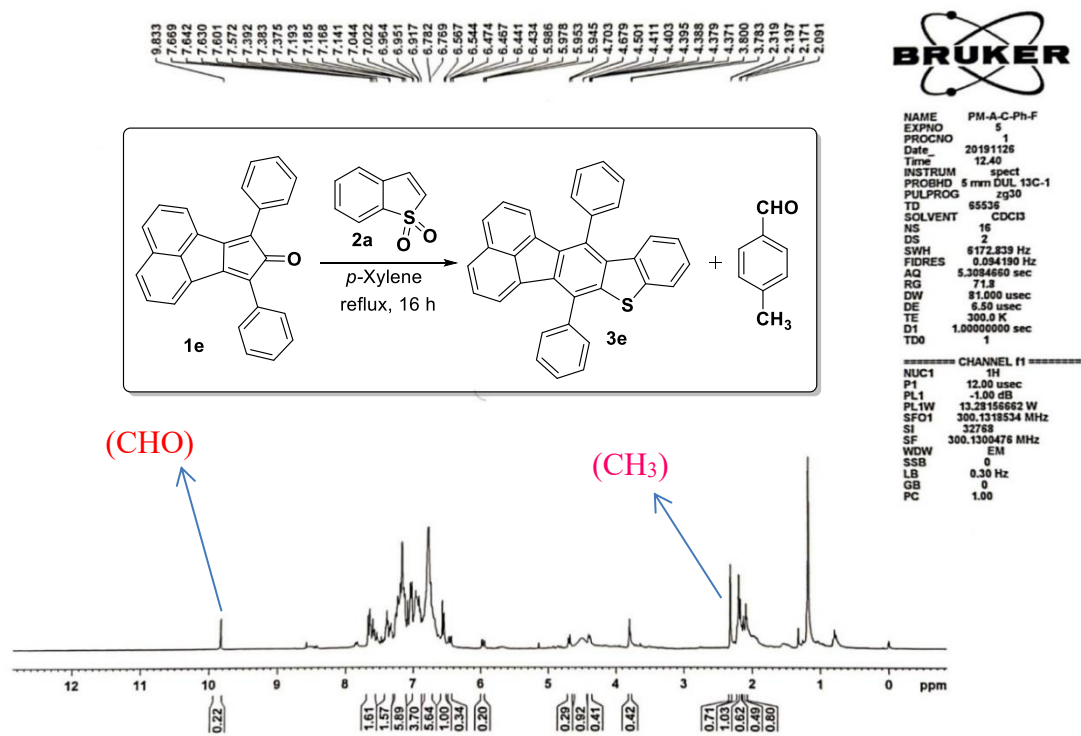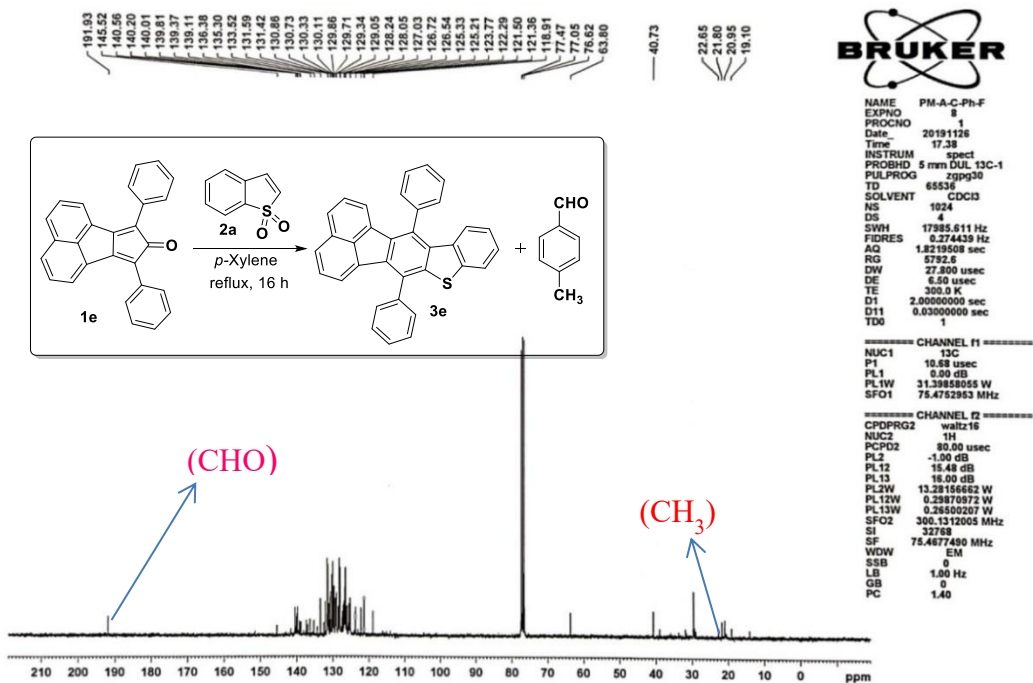

**Diels-Alder reaction of 7,9-bis(4-methoxyphenyl)-8*H*-cyclopenta[*a*]acenaphthylen-8-one **1g** with benzo[*b*]thiophene *S,S*-dioxide **2a** in *p*-xylene**

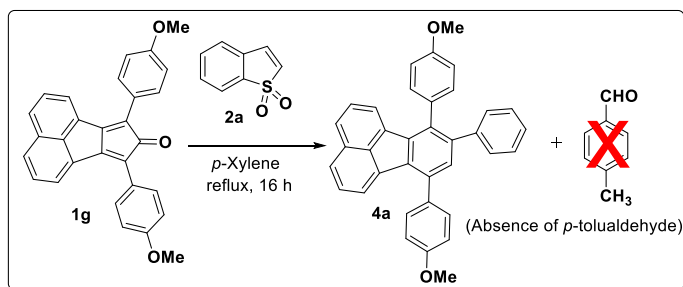

To a solution of cyclopentadienone **1a** (0.25 g, 0.60 mmol) in *p*-xylene (10 mL), benzo[*b*]thiophene *S,S*-dioxide **2a** (0.10 g, 0.60 mmol) was added and refluxed for 16 h. Subsequent removal of solvent followed by  $^1\text{H}$ ,  $^{13}\text{C}$  NMR and mass spectra.

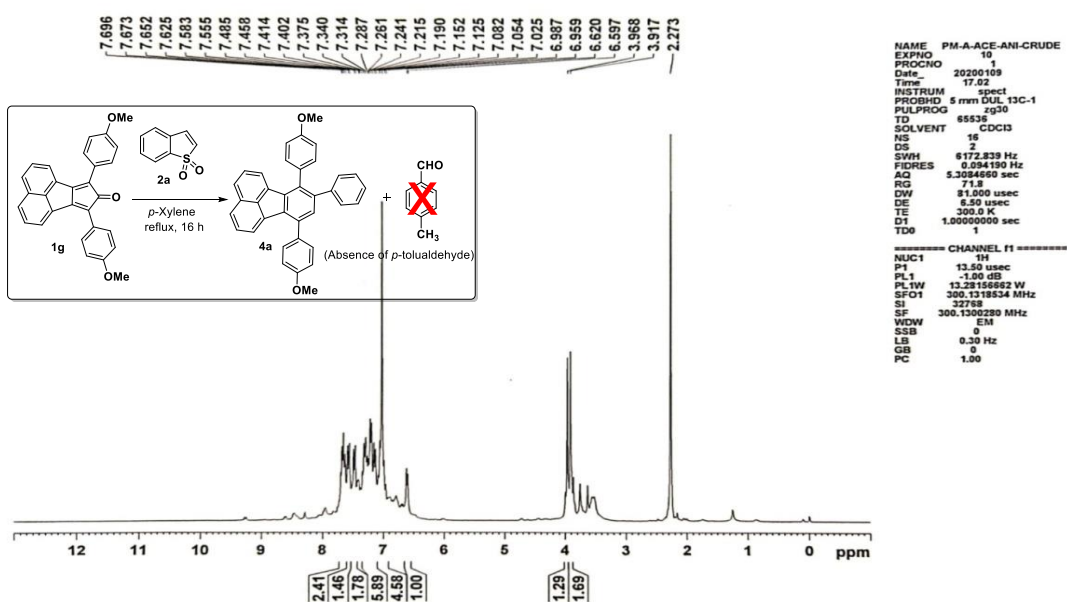

$^1\text{H}$ -NMR (300 MHz,  $\text{CDCl}_3$ ) spectrum of crude product

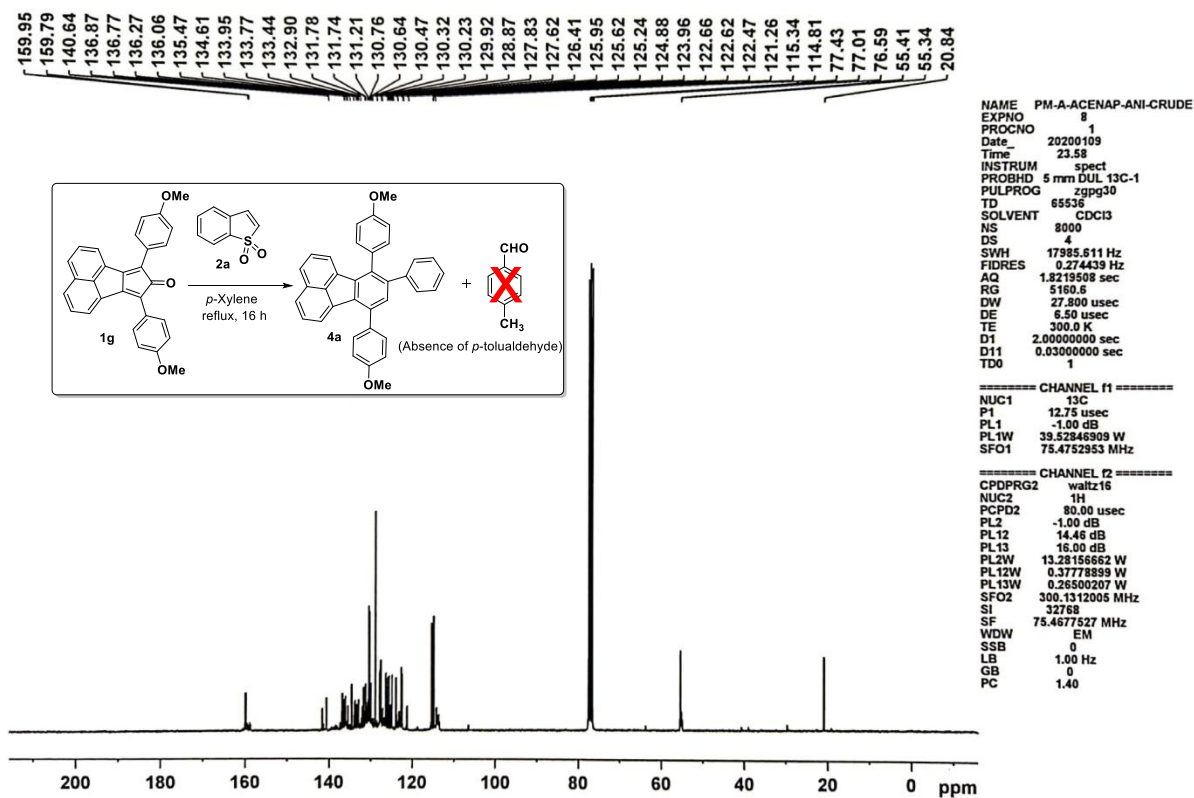

### Thermolysis of dihydrodibenzothiophene **5a** in the presence of TEMPO

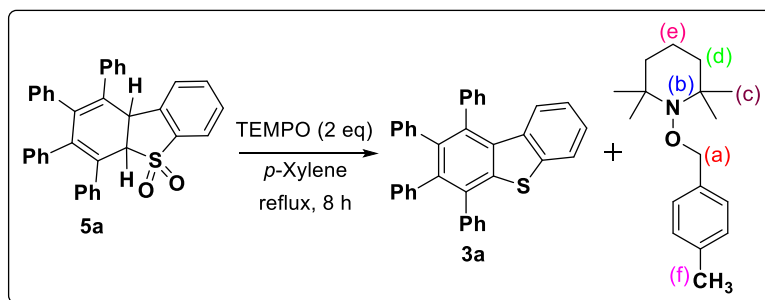

To a stirred solution of dihydrodibenzothiophene **5a** (0.1 g, 0.19 mmol) in dry *p*-xylene (10 mL), TEMPO (60 mg, 0.38 mmol) was added at refluxed for 8 h. The subsequent removal of solvent gave crude product. Then, the crude product was analyzed by <sup>1</sup>H, <sup>13</sup>C NMR and mass spectra.

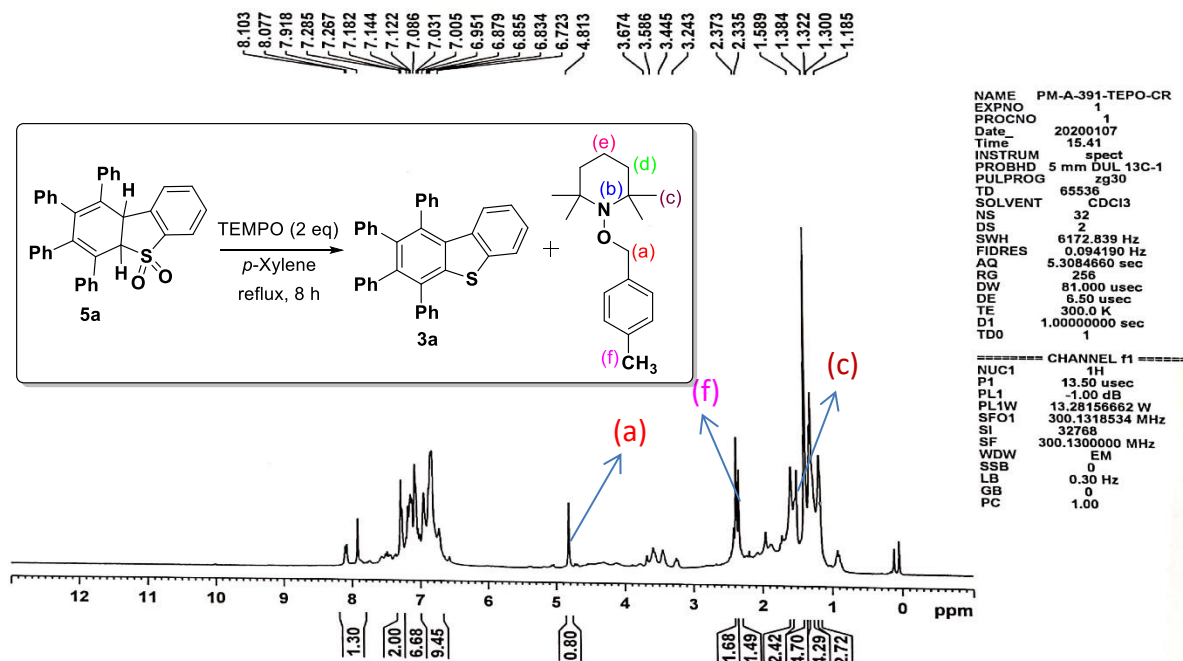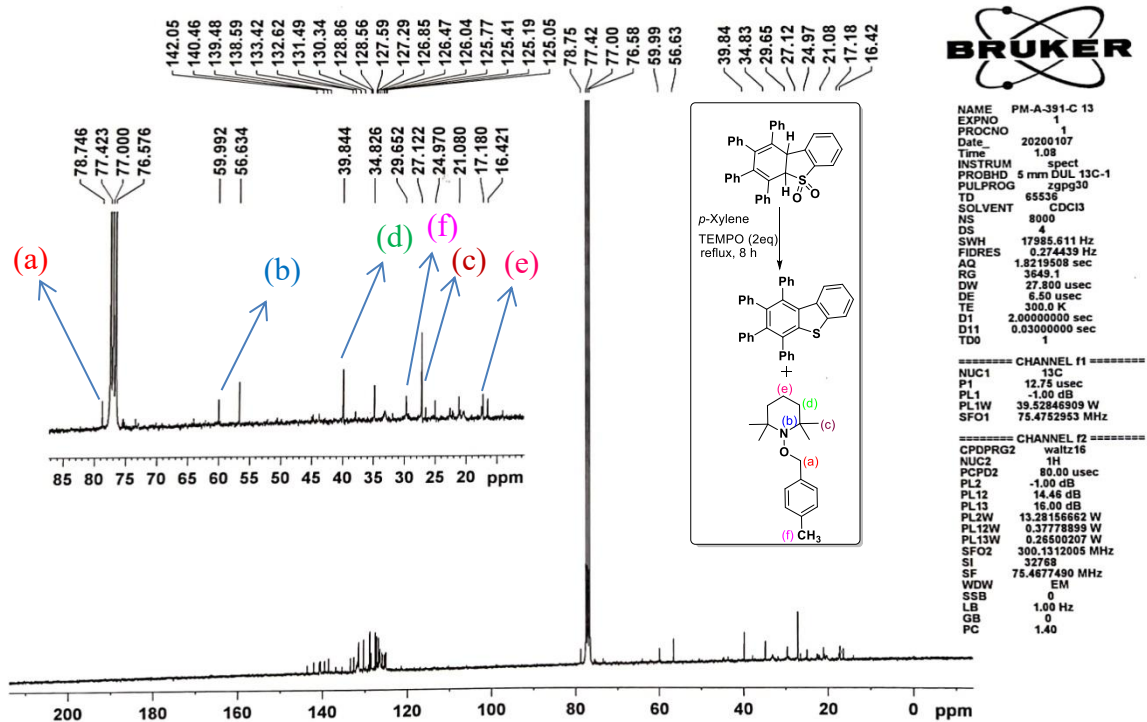

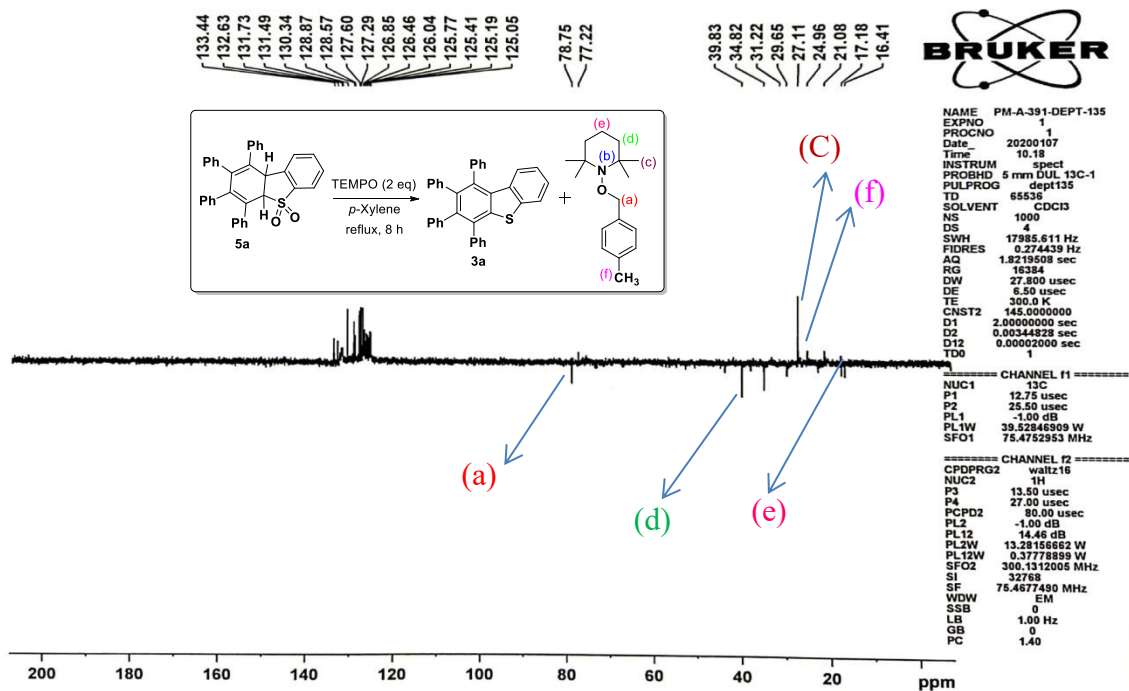

DEPT-135 NMR (75 MHz, CDCl<sub>3</sub>) spectrum of crude product

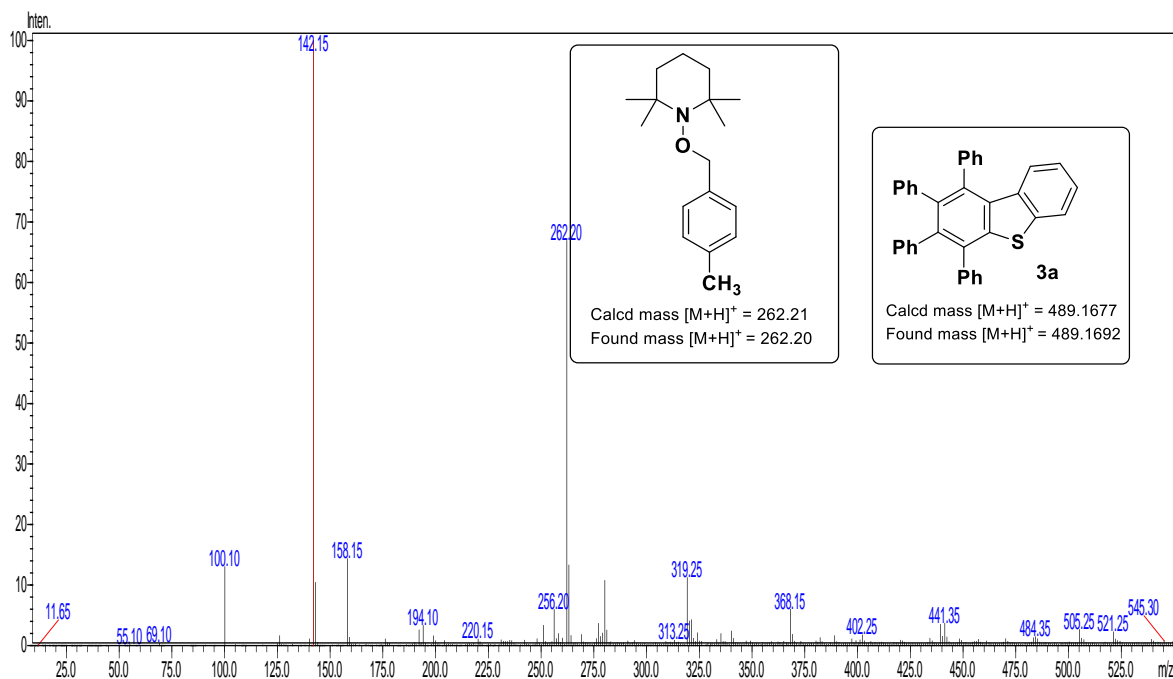

Mass spectrum of reaction mixture

## Thermolysis of dihydrodibenzothiophene **5b** in the presence of TEMPO

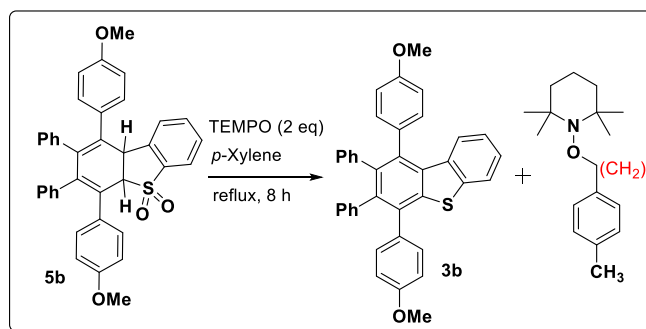

To a stirred solution of dihydrodibenzothiophene **5a** (0.1 g, 0.17 mmol) in dry *p*-xylene (10 mL), TEMPO (54 mg, 0.34 mmol) was added at refluxed for 8 h. The subsequent removal of solvent gave crude product. Then, the crude product was analysis by <sup>1</sup>H, <sup>13</sup>C NMR and mass spectra.

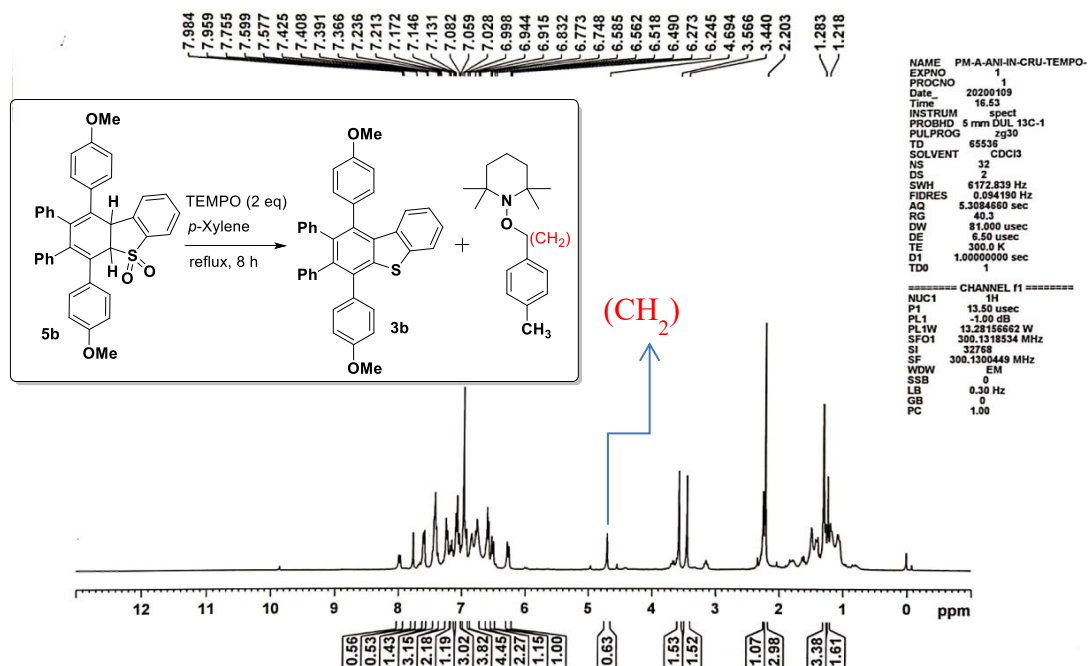

<sup>1</sup>H-NMR (300 MHz, CDCl<sub>3</sub>) spectrum of crude product



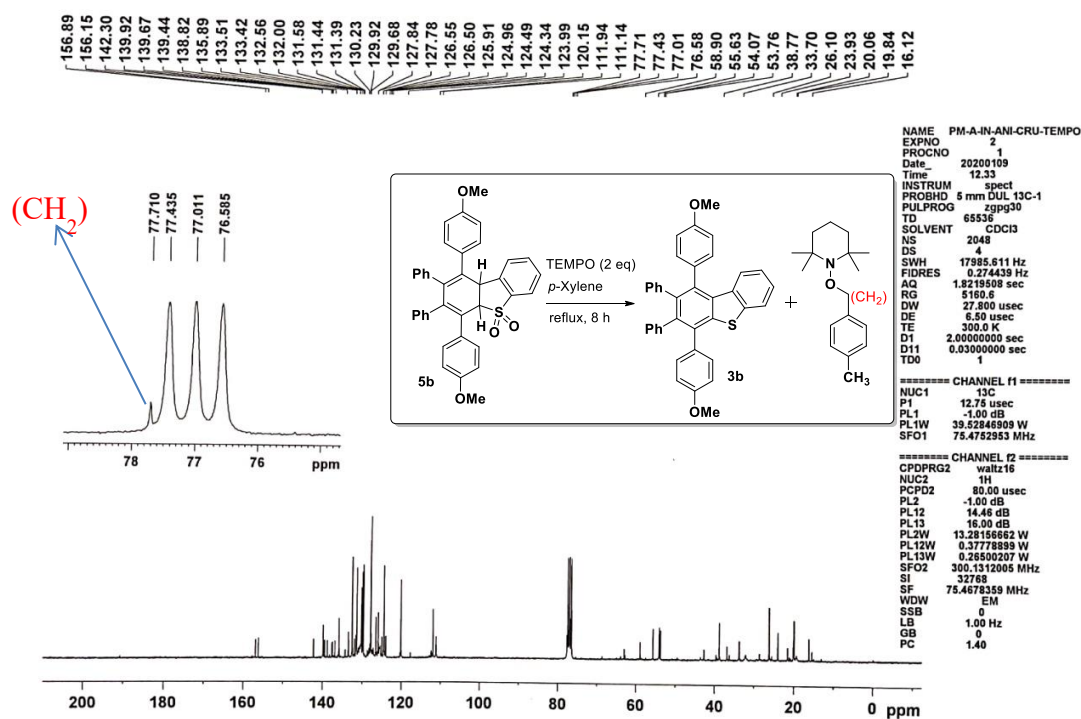

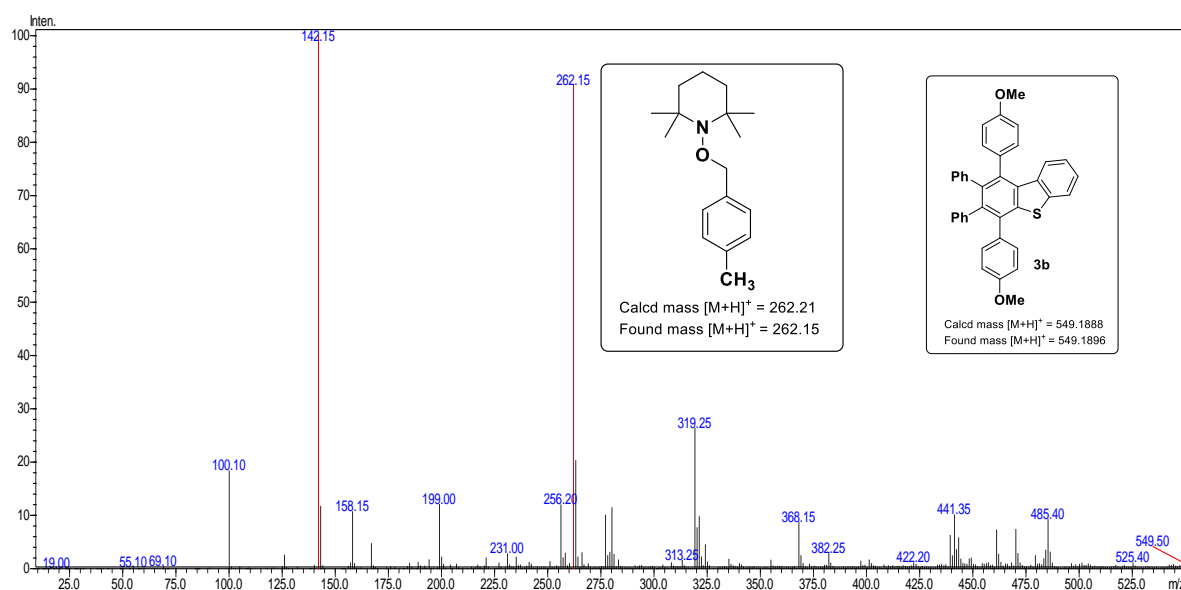

Mass spectrum of crude product

**Diels-Alder reaction of 7,9-diphenyl-8*H*-cyclopenta[*a*]acenaphthylen-8-one **1e** with benzo[*b*]thiophene *S,S*-dioxide **2a** in the presence of TEMPO**

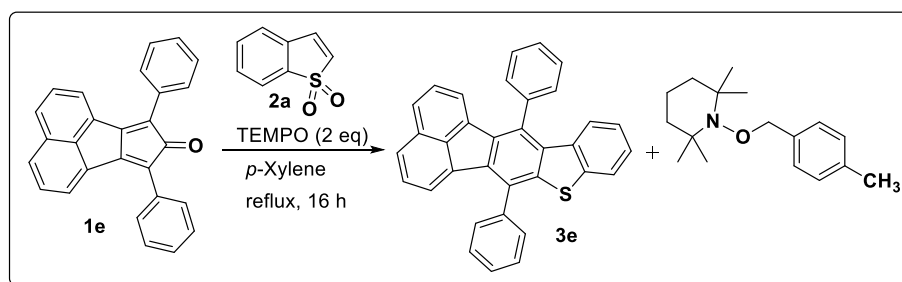

To a solution of cyclopentadienone **1e** (0.20 g, 0.56 mmol) in *p*-xylene (10 mL), benzo[*b*]thiophene *S,S*-dioxide **2a** (0.10 g, 0.60 mmol), TEMPO (75 mg, 0.15 mmol) was added at reflux for 16 h. The subsequent removal of solvent gave crude product. Then, the crude product was analysis by  $^1\text{H}$ ,  $^{13}\text{C}$  NMR and mass spectra.



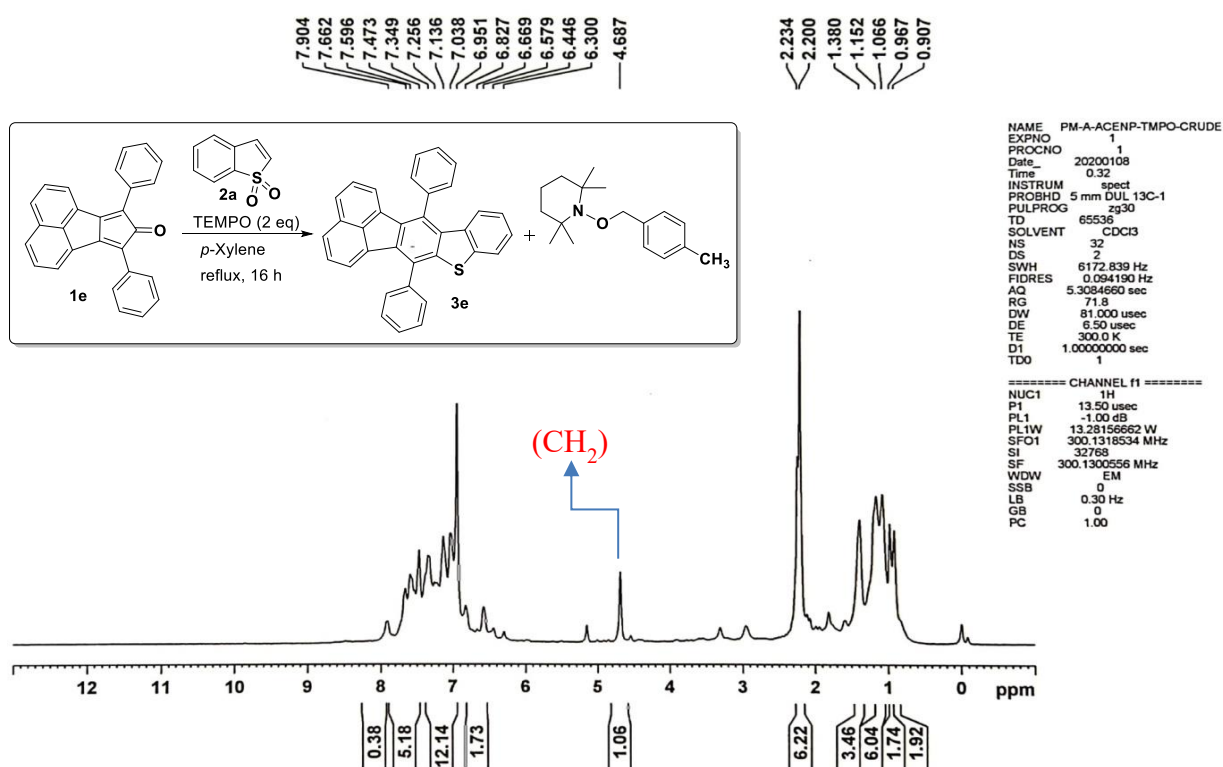

<sup>1</sup>H-NMR (300 MHz, CDCl<sub>3</sub>) spectrum of crude product

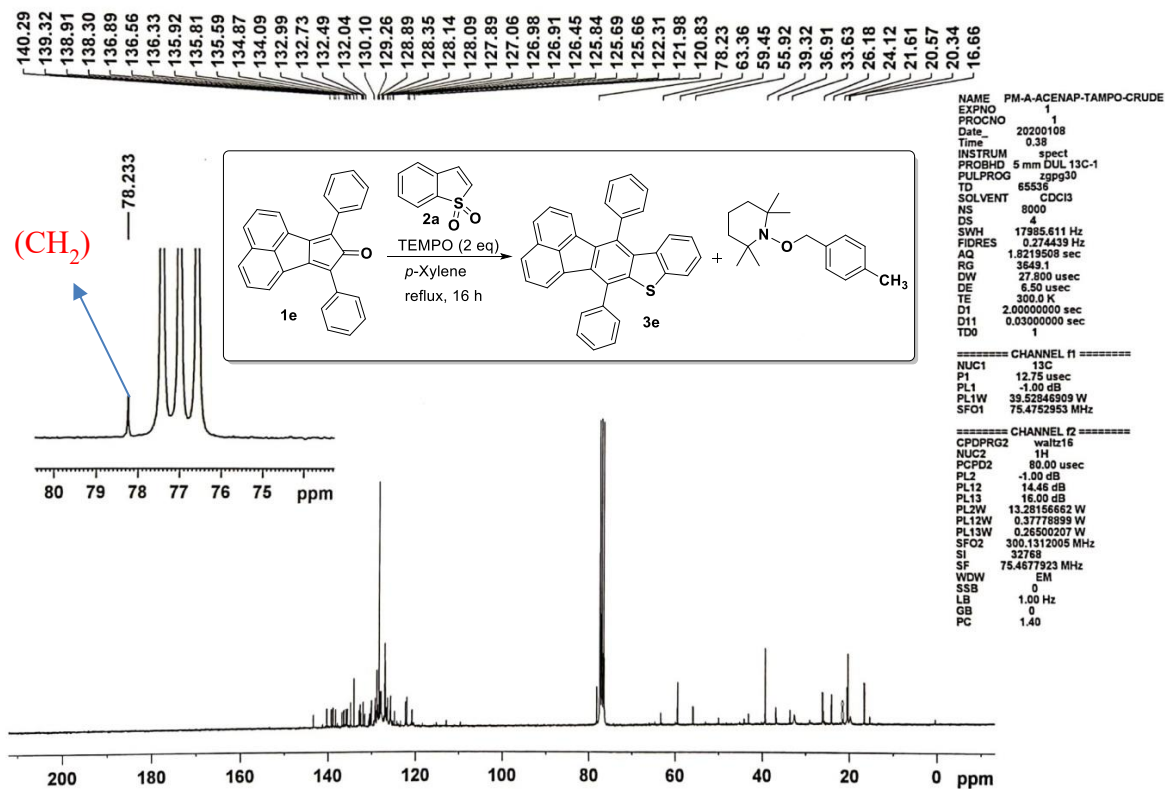

<sup>13</sup>C-NMR (75 MHz, CDCl<sub>3</sub>) spectrum of crude product

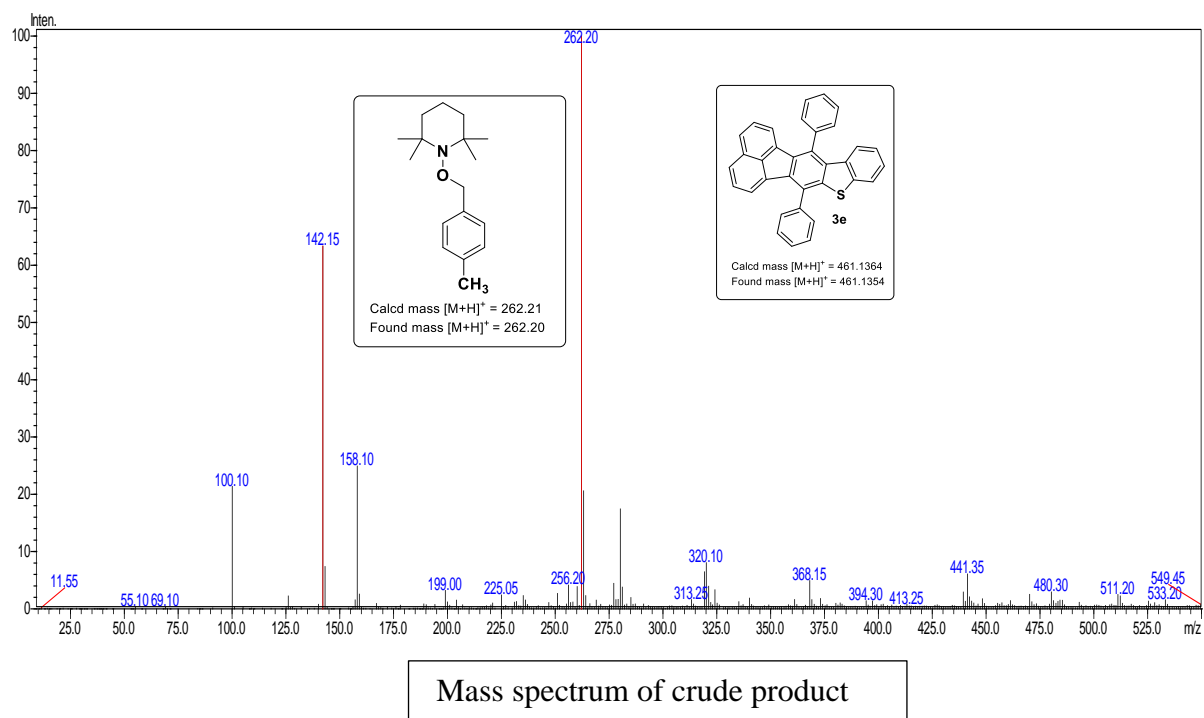

**Diels-Alder reaction of 7,9-bis(4-methoxyphenyl)-8*H*-cyclopenta[*a*]acenaphthylen-8-one **1g** with benzo[*b*]thiophene *S,S*-dioxide **2a** in the presence of TEMPO**

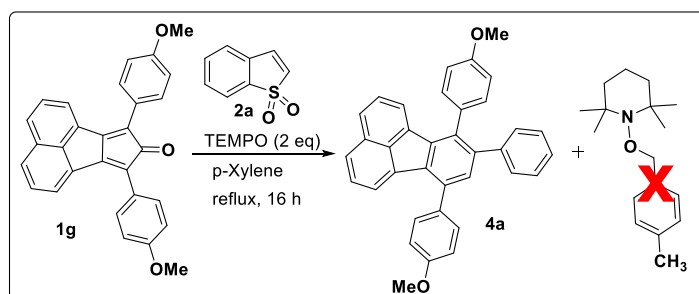

To a solution of cyclopentadienone **1g** (0.25 g, 0.60 mmol) in *p*-xylene (10 mL), benzo[*b*]thiophene *S,S*-dioxide **2a** (0.10 g, 0.60 mmol) TEMPO (67 mg, 0.12 mmol) was added at reflux for 16 h. The subsequent removal of solvent gave crude product. Then, the crude product was analysis by  $^1\text{H}$ ,  $^{13}\text{C}$  NMR and mass spectra.

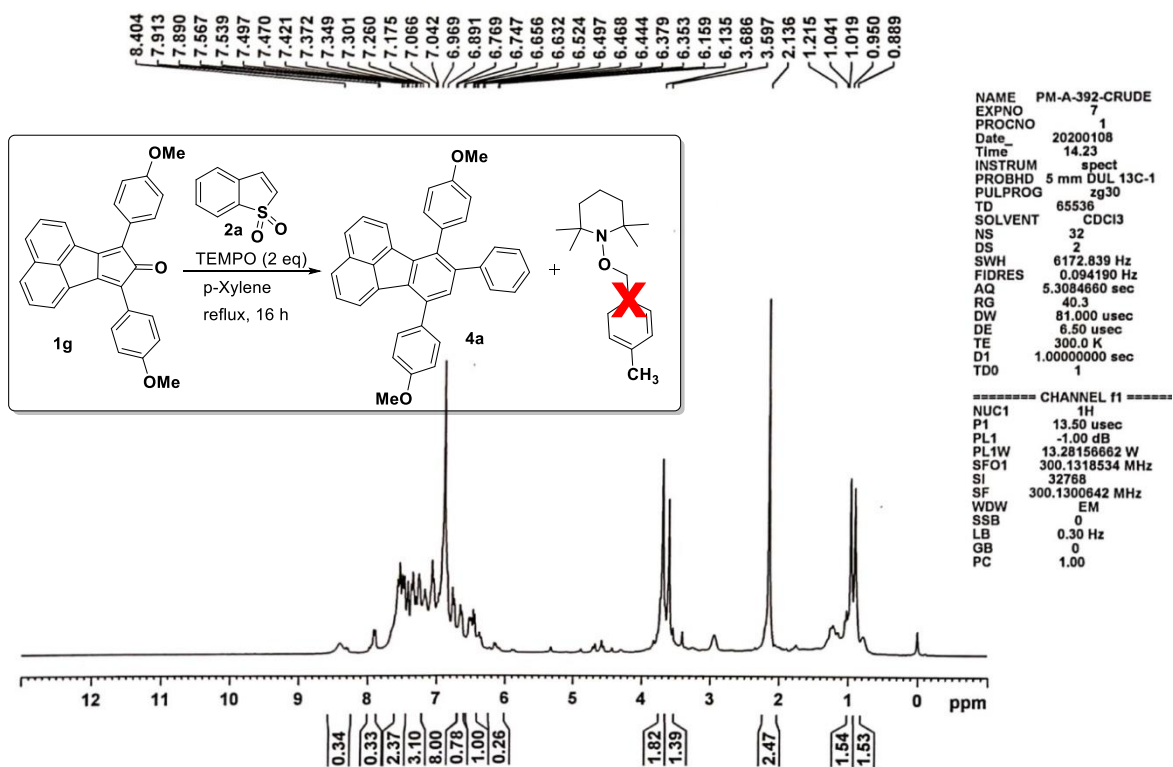

<sup>1</sup>H-NMR (300 MHz, CDCl<sub>3</sub>) spectrum of crude product

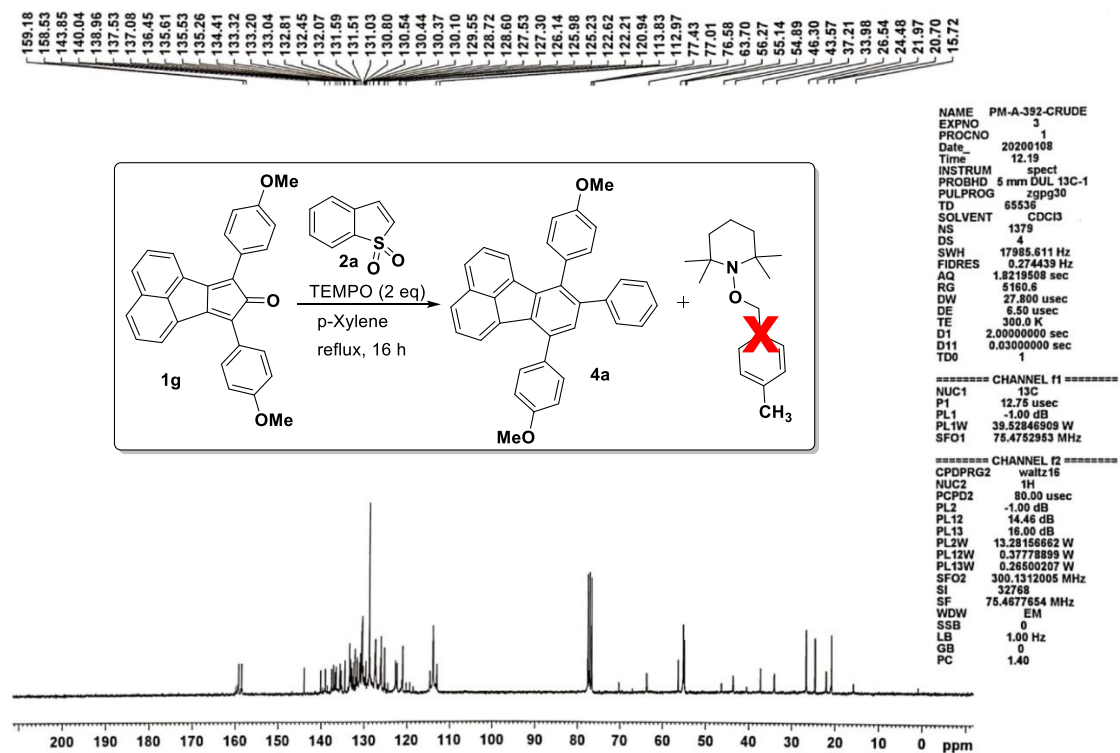

<sup>13</sup>C-NMR (75 MHz, CDCl<sub>3</sub>) spectrum of crude product

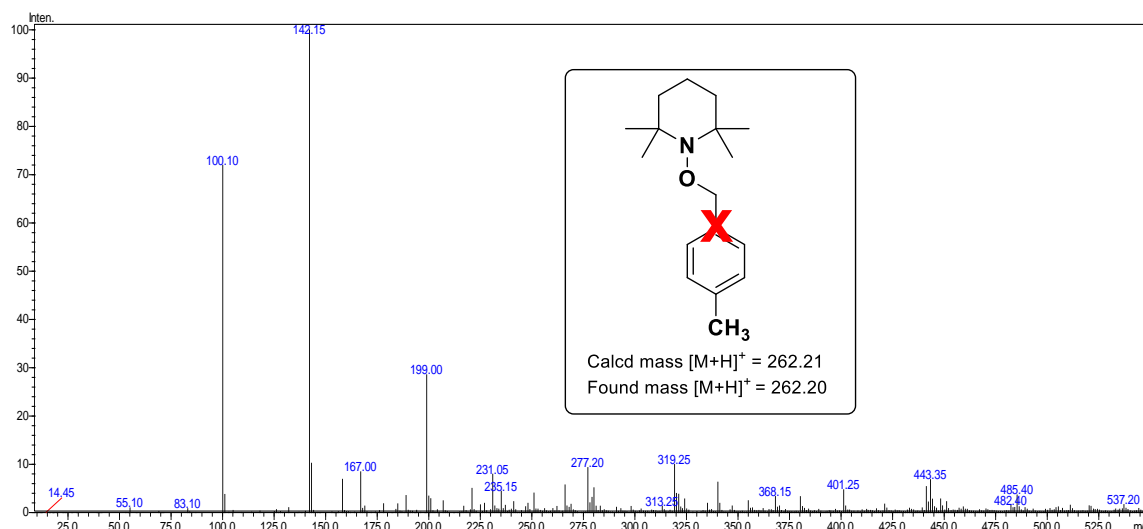

Mass spectrum of crude product

### General procedure for preparation of dibenzothiophenes **3g-r**/fluoranthene derivatives **4d-4q**:

To a solution of cyclopentadienones (~0.5 mmol) in xylenes (10 mL), benzo[*b*]thiophene *S,S*-dioxides (~0.5 mmol) was added and refluxed for 16 h. Removal of solvent followed by column chromatographic purification (silica gel; EA/hexane) afforded the respective dibenzothiophenes **3g-r** as well as triarylfluoranthene and pentaarylbenzene analogues **4d-q**.

### 7,8-Dimethoxy-1,2,3,4-tetraphenyldibenzo[*b,d*]thiophene **3g**

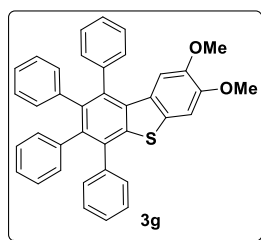

The dibenzothiophene **3g** (0.18 g, 75%) was prepared according to the general procedure using cyclopentadienone **1a** (0.17 g, 0.44 mmol) and benzo[*b*]thiophene *S,S*-dioxide **2a** (0.10 g, 0.44 mmol) as a colorless solid.  $R_f = 0.25$  (eluent: 10% ethyl acetate in hexane); mp 216–218 °C;  $^1\text{H-NMR}$  (300 MHz,  $\text{CDCl}_3$ ):  $\delta$  7.28–7.23 (m, 5H, ArH), 7.20–7.18 (m, 5H, ArH), 7.07 (s, 1H, ArH), 6.81–6.78 (m, 10H, ArH), 6.07 (s, 1H, ArH), 3.82 (s, 3H,  $\text{OCH}_3$ ), 3.28 (s, 3H,  $\text{OCH}_3$ ) ppm;  $^{13}\text{C-NMR}$  (75 MHz,  $\text{CDCl}_3$ ):  $\delta$  148.7, 146.6, 140.3, 140.2, 139.9, 139.8, 138.7, 137.5, 136.2, 135.2,

133.0, 131.54, 131.49, 130.7, 130.0, 129.2, 128.3, 128.0, 127.2, 126.9, 126.7, 126.5, 125.5, 125.4, 107.1, 103.8, 55.9 (OCH<sub>3</sub>), 55.2 (OCH<sub>3</sub>) ppm; DEPT-135 NMR (75 MHz, CDCl<sub>3</sub>):  $\delta$  131.5, 131.5, 130.7, 130.0, 128.3, 128.0, 127.2, 126.9, 126.7, 126.6, 125.6, 125.4, 107.1, 103.7, 55.9, 55.2 ppm; HRMS (ESI):  $m/z$  Calcd for C<sub>38</sub>H<sub>28</sub>O<sub>2</sub>S [M+H]<sup>+</sup>: 549.1888, Found 549.1897.

### 7,8-dimethoxy-1,4-bis(4-methoxyphenyl)-2,3-diphenyldibenzo[b,d]thiophene **3h**

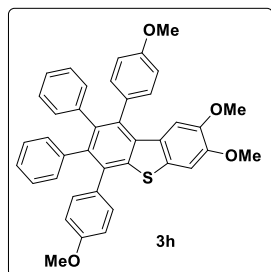

The pentaarylbenzene **3h** (0.18 g, 72%) was prepared according to the general procedure using cyclopentadienone **1b** (0.19 g, 0.44 mmol) and benzo[*b*]thiophene *S,S*-dioxide (0.10 g, 0.44 mmol) as a colorless solid.  $R_f$  = 0.20 (eluent: 15% ethyl acetate in hexane); mp 240-242 °C; <sup>1</sup>H-NMR (300 MHz, CDCl<sub>3</sub>):  $\delta$  7.25-7.23 (m, 2H, ArH), 7.19-7.14 (m, 3H, ArH), 6.88-6.84 (m, 14H, ArH), 6.16 (s, 1H, ArH), 3.89 (s, 3H, OCH<sub>3</sub>), 3.77 (s, 3H, OCH<sub>3</sub>), 3.75 (s, 3H, OCH<sub>3</sub>), 3.41 (s, 3H, OCH<sub>3</sub>) ppm; <sup>13</sup>C-NMR (75 MHz, CDCl<sub>3</sub>):  $\delta$  158.50, 158.48, 148.7, 146.6, 140.6, 140.0, 139.1, 137.7, 135.7, 134.7, 133.0, 132.6, 132.3, 131.8, 131.5, 131.2, 129.4, 126.6, 125.4, 125.3, 113.7, 113.4, 107.2, 103.8, 56.0 (OCH<sub>3</sub>), 55.3 (OCH<sub>3</sub>), 55.2 (OCH<sub>3</sub>), 55.1 (OCH<sub>3</sub>) ppm; DEPT-135 NMR (75 MHz, CDCl<sub>3</sub>):  $\delta$  131.8, 131.5, 131.5, 131.2, 126.7, 126.6, 125.4, 125.4, 125.3, 113.7, 113.4, 107.2, 103.8, 56.0, 55.3, 55.2, 55.1 ppm; HRMS (ESI):  $m/z$  Calcd for C<sub>40</sub>H<sub>32</sub>O<sub>4</sub>S [M+H]<sup>+</sup>: 609.2100, Found 609.2115.

### 6,7,8,9-Tetraphenylbenzo[4',5']thieno[2',3':4,5]benzo[1,2-*d*][1,3]dioxole **3i**

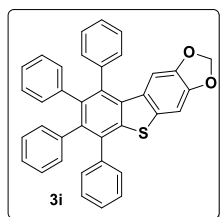

The dibenzothiophene **3i** (0.19 g, 75%) was prepared according to the general procedure using cyclopentadienone **1a** (0.18 g, 0.47 mmol) and benzo[*b*]thiophene *S,S*-dioxide **2d** (0.10 g, 0.47 mmol) as a colorless solid.  $R_f$  = 0.20 (eluent: 5% ethyl acetate in hexane); mp 220-222 °C; <sup>1</sup>H-NMR (400 MHz, CDCl<sub>3</sub>):  $\delta$  7.33-7.28 (m, 5H, ArH), 7.25-7.22 (m, 4H, ArH), 7.11 (s, 1H, ArH), 6.87 (m, 11H, ArH), 5.95 (s, 1H, ArH), 5.90 (s, 2H, OCH<sub>2</sub>) ppm; <sup>13</sup>C-NMR (100 MHz, CDCl<sub>3</sub>):  $\delta$  147.1, 145.7, 140.1, 139.8, 139.7, 138.9, 137.6, 136.6, 135.1, 134.3, 132.4, 131.5, 131.4, 130.3, 130.0, 128.3, 128.1, 127.2, 127.1, 126.7, 126.5, 125.6, 125.4, 104.6, 101.7, 101.3 (OCH<sub>2</sub>) ppm;

DEPT-135 NMR (100 MHz, CDCl<sub>3</sub>):  $\delta$  131.5, 131.4, 130.3, 130.1, 130.0, 129.3, 128.4, 128.3, 128.0, 127.4, 127.2, 127.1, 126.6, 126.5, 125.5, 125.3, 104.6, 101.7, 101.2 ppm; HRMS (ESI):  $m/z$  Calcd for C<sub>37</sub>H<sub>24</sub>O<sub>2</sub>S [M+H]<sup>+</sup>: 533.1575, Found 533.1582.

**6,9-Bis(4-methoxyphenyl)-7,8-diphenylbenzo[4',5']thieno[2',3':4,5]benzo[1,2-d][1,3]dioxole 3j**

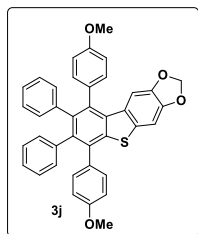

The dibenzothiophene **3j** (0.19 g, 70%) was prepared according to the general procedure using cyclopentadienone **1b** (0.21 g, 0.47 mmol) and benzo[*b*]thiophene *S,S*-dioxide **2d** (0.10 g, 0.47 mmol) as a colorless solid.  $R_f$  = 0.25 (eluent: 10% ethyl acetate in hexane); mp 176-178 °C; <sup>1</sup>H-NMR (300 MHz, CDCl<sub>3</sub>):  $\delta$  7.25-7.21 (m, 2H, ArH), 7.12-7.09 (m, 3H, ArH), 6.86-6.77 (m, 14H, ArH), 6.12 (s, 1H, ArH), 5.90 (s, 2H, OCH<sub>2</sub>), 3.79 (s, 3H, OCH<sub>3</sub>), 3.78 (s, 3H, OCH<sub>3</sub>) ppm; <sup>13</sup>C-NMR (75 MHz, CDCl<sub>3</sub>):  $\delta$  158.7, 147.2, 145.7, 140.8, 140.2, 140.1, 139.5, 137.9, 135.9, 134.8, 134.4, 132.9, 132.6, 132.1, 131.6, 131.5, 131.4, 131.2, 131.6, 126.7, 126.5, 125.5, 125.3, 113.9, 113.6, 104.8, 101.7, 101.3 (OCH<sub>2</sub>), 55.2 (OCH<sub>3</sub>), 55.1 (OCH<sub>3</sub>) ppm; DEPT-135 NMR (75 MHz, CDCl<sub>3</sub>):  $\delta$  131.5, 131.4, 131.3, 131.2, 126.7, 126.5, 125.4, 125.2, 113.8, 113.5, 104.7, 101.7, 101.2, 55.1, 55.1 ppm; HRMS (ESI):  $m/z$  Calcd for C<sub>39</sub>H<sub>30</sub>O<sub>4</sub>S [M]<sup>+</sup>: 593.1787, Found 593.1798.

**10,11-Dimethoxy-7,13-diphenylbenzo[*d*]fluorantheno[8,9-*b*]thiophene 3k**

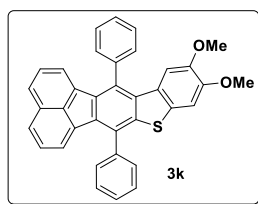

The dibenzothiophene **3k** (0.17 g, 74%) was prepared according to the general procedure using cyclopentadienone **1e** (0.15 g, 0.44 mmol) and benzo[*b*]thiophene *S,S*-dioxide **2b** (0.10 g, 0.44 mmol) as a green solid.  $R_f$  = 0.25 (eluent: 10% ethyl acetate in hexane); mp 190-192 °C; <sup>1</sup>H-NMR (300 MHz, CDCl<sub>3</sub>):  $\delta$  7.78-7.66 (m, 12H, ArH), 7.37-7.26 (m, 2H, ArH), 7.15 (s, 1H, ArH), 6.93 (d,  $J$  = 6.9 Hz, 1H, ArH), 6.62 (d,  $J$  = 6.9 Hz, 1H, ArH), 6.39 (s, 1H, ArH), 3.90 (s, 3H, OCH<sub>3</sub>), 3.42 (s, 3H, OCH<sub>3</sub>) ppm; <sup>13</sup>C-NMR (75 MHz, CDCl<sub>3</sub>):  $\delta$  148.7, 146.9, 140.8, 139.5, 138.9, 136.7, 136.0, 135.4, 134.0, 133.8, 133.2, 132.9, 132.6, 132.2, 129.9, 129.7, 129.5, 129.3, 129.2, 128.6, 128.3, 127.8, 127.7, 126.3, 126.0, 122.5, 122.4, 106.7, 104.0, 56.0 (OCH<sub>3</sub>), 55.2

(OCH<sub>3</sub>) ppm; DEPT-135 NMR (75 MHz, CDCl<sub>3</sub>):  $\delta$  129.9, 129.7, 129.3, 129.2, 128.6, 128.3, 127.8, 127.7, 126.3, 126.0, 122.5, 122.4, 106.7, 104.0, 56.0, 55.1 ppm; HRMS (ESI):  $m/z$  Calcd for C<sub>36</sub>H<sub>24</sub>O<sub>2</sub>S [M+H]<sup>+</sup>: 521.1575, Found 521.1575.

### 7,13-Bis(4-bromophenyl)-10,11-dimethoxybenzo[*d*]fluorantheno[8,9-*b*]thiophene **3l**

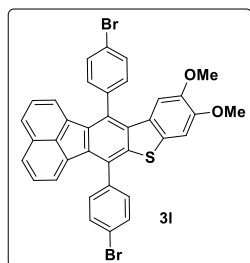

The dibenzothiophene **3l** (0.21 g, 70%) was prepared according to the general procedure using cyclopentadienone **1f** (0.22 g, 0.44 mmol) and benzo[*b*]thiophene *S,S*-dioxide **2b** (0.10 g, 0.44 mmol) as a green solid.  $R_f$  = 0.26 (eluent: 10% ethyl acetate in hexane); mp >300 °C; <sup>1</sup>H-NMR (300 MHz, CDCl<sub>3</sub>):  $\delta$  7.89 (d,  $J$  = 8.4 Hz, 2H, ArH), 7.80 (d,  $J$  = 8.1 Hz, 2H, ArH), 7.76-7.72 (m, 2H, ArH), 7.58-7.53 (m, 4H, ArH), 7.41-7.34 (m, 2H, ArH), 7.15 (s, 1H, ArH), 6.98 (d,  $J$  = 6.9 Hz, 1H, ArH), 6.73 (d,  $J$  = 6.9 Hz, 1H, ArH), 6.27 (s, 1H, ArH), 3.90 (s, 3H, OCH<sub>3</sub>), 3.50 (s, 3H, OCH<sub>3</sub>) ppm; <sup>13</sup>C-NMR (75 MHz, CDCl<sub>3</sub>):  $\delta$  148.9, 147.1, 140.6, 138.4, 137.7, 136.3, 135.6, 135.3, 133.9, 133.8, 133.2, 133.1, 132.7, 132.6, 131.6, 131.6, 131.0, 129.9, 129.1, 127.9, 127.8, 126.6, 126.4, 122.9, 122.6, 122.53, 122.46, 106.4, 104.2, 56.1 (OCH<sub>3</sub>), 55.1 (OCH<sub>3</sub>) ppm; DEPT-135 NMR (75 MHz, CDCl<sub>3</sub>):  $\delta$  133.1, 132.7, 131.6, 131.0, 127.9, 127.8, 126.6, 126.4, 122.53, 122.46, 106.4, 104.1, 56.1, 55.1 ppm; HRMS (ESI):  $m/z$  Calcd for C<sub>36</sub>H<sub>22</sub>Br<sub>2</sub>O<sub>2</sub>S [M+H]<sup>+</sup>: 676.9786, Found 676.9763.

### 9,12-Dimethoxy-7,13-diphenylbenzo[*d*]fluorantheno[8,9-*b*]thiophene **3m**

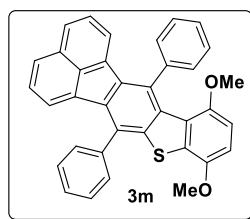

The dibenzothiophene **3m** (0.13 g, 57%) was prepared according to the general procedure using cyclopentadienone **1e** (0.15 g, 0.44 mmol) and benzo[*b*]thiophene *S,S*-dioxide **2c** (0.10 g, 0.44 mmol) as a green solid.  $R_f$  = 0.25 (eluent: 10 % ethyl acetate in hexane); mp 290-292 °C; <sup>1</sup>H-NMR (300 MHz, CDCl<sub>3</sub>):  $\delta$  7.71-7.58 (m, 7H, ArH), 7.57-7.51 (m, 5H, ArH), 7.34-7.28 (m, 1H, ArH), 7.24-7.21 (m, 1H, ArH), 6.85-6.76 (m, 2H, ArH), 6.56 (d,  $J$  = 8.4 Hz, 1H, ArH), 6.04 (d,  $J$  = 7.2 Hz, 1H, ArH), 3.92 (s, 3H, OCH<sub>3</sub>), 3.09 (s, 3H, OCH<sub>3</sub>) ppm; <sup>13</sup>C-NMR (75 MHz, CDCl<sub>3</sub>):  $\delta$  150.4, 147.8, 144.3, 138.9, 137.5, 137.1, 135.7, 135.6, 134.0, 131.8, 131.2, 129.7, 129.4, 129.3,

128.7, 128.0, 127.9, 127.4, 126.8, 126.6, 126.4, 125.8, 123.4, 122.5, 106.7, 105.8, 56.2 (OCH<sub>3</sub>), 55.2 (OCH<sub>3</sub>) ppm; DEPT-135 NMR (75 MHz, CDCl<sub>3</sub>):  $\delta$  129.4, 129.3, 128.7, 127.9, 127.8, 127.4, 126.6, 126.4, 125.8, 123.4, 122.5, 106.7, 105.8, 56.2, 55.2. HRMS(ESI):  $m/z$  Calcd for C<sub>36</sub>H<sub>25</sub>O<sub>2</sub>S [M+H]<sup>+</sup>: 521.1575, Found 521.1575.

**7,13-Bis(4-bromophenyl)-9,12-dimethoxybenzo[*d*]fluorantheno[8,9-*b*]thiophene 3n**

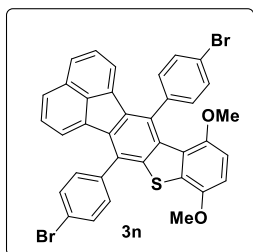

The fluoranthene **3n** (0.10 g, 63%) was prepared according to the general procedure using cyclopentadienone **1f** (0.22 g, 0.44 mmol) and benzo[*b*]thiophene *S,S*-dioxide **2c** (0.10 g, 0.44 mmol) as a green solid.  $R_f$  = 0.30 (eluent: 10% ethyl acetate in hexane); mp 201-203 °C; <sup>1</sup>H-NMR (300 MHz, CDCl<sub>3</sub>):  $\delta$  7.68-7.64 (m, 2H, ArH), 7.59 (d,  $J$  = 8.4 Hz, 2H, ArH), 7.50 (d,  $J$  = 8.4 Hz, 2H, ArH), 7.40-7.31 (m, 3H, ArH), 7.29-7.24 (m, 2H, ArH), 7.16-7.12 (m, 1H, ArH), 6.72 (d,  $J$  = 7.2 Hz, 1H, ArH), 6.66-6.62 (m, 2H, ArH), 6.54 (d,  $J$  = 9.3 Hz, 1H, ArH) 3.62 (s, 3H, OCH<sub>3</sub>), 3.42 (s, 3H, OCH<sub>3</sub>) ppm; <sup>13</sup>C-NMR (75 MHz, CDCl<sub>3</sub>):  $\delta$  151.9, 149.5, 138.6, 137.2, 136.7, 136.7, 135.5, 135.2, 135.1, 134.9, 134.6, 131.9, 130.7, 130.6, 130.0, 129.9, 129.3, 128.8, 126.64, 126.56, 125.9, 122.2, 121.8, 120.9, 120.3, 116.5, 112.3, 110.2, 54.7 (OCH<sub>3</sub>), 54.5 (OCH<sub>3</sub>) ppm; DEPT-135 NMR (75 MHz, CDCl<sub>3</sub>):  $\delta$  130.7, 130.6, 130.0, 129.9, 126.6, 126.6, 125.9, 122.2, 121.8, 116.5, 112.2, 110.2, 54.7, 54.4 ppm; HRMS (ESI):  $m/z$  Calcd for C<sub>36</sub>H<sub>22</sub>Br<sub>2</sub>O<sub>2</sub>S [M+H]<sup>+</sup>: 676.9786, Found 676.9798.

**7,14-Diphenylfluorantheno[8'',9'':4',5']thieno[2',3':4,5]benzo[1,2-*d*][1,3]dioxole 3o**

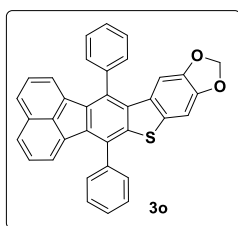

The dibenzothiophene **3o** (0.19 g, 79%) was prepared according to the general procedure using cyclopentadienone **1e** (0.17 g, 0.47 mmol) and benzo[*b*]thiophene *S,S*-dioxide **2d** (0.10 g, 0.47 mmol) as a green solid.  $R_f$  = 0.25 (eluent: 5% ethyl acetate in hexane); mp 258-260 °C; <sup>1</sup>H-NMR (300 MHz, CDCl<sub>3</sub>):  $\delta$  7.71-7.58 (m, 12H, ArH), 7.35-7.24 (m, 2H, ArH), 7.09 (s, 1H, ArH), 6.92 (d,  $J$  = 7.2 Hz, 1H, ArH), 6.49 (d,  $J$  = 7.2 Hz, 1H, ArH), 6.22 (s, 1H, ArH), 5.90 (s, 2H, OCH<sub>2</sub>) ppm; <sup>13</sup>C-NMR (75 MHz, CDCl<sub>3</sub>):  $\delta$  147.0, 145.9, 140.8, 139.3, 138.8, 136.7, 135.9, 135.6,



134.4, 134.0, 133.9, 133.1, 132.4, 132.0, 130.4, 130.0, 129.8, 129.3, 129.2, 129.2, 129.1, 128.7, 128.5, 127.8, 127.6, 126.3, 126.0, 122.5, 122.4, 104.2, 101.9, 101.3 (OCH<sub>2</sub>) ppm; DEPT-135 NMR (75 MHz, CDCl<sub>3</sub>):  $\delta$  130.0, 129.3, 129.2, 129.1, 128.7, 128.5, 127.8, 127.6, 126.3, 126.0, 122.6, 122.4, 104.2, 101.3 ppm; HRMS (ESI):  $m/z$  Calcd for C<sub>35</sub>H<sub>20</sub>O<sub>2</sub>S [M+H]<sup>+</sup>: 505.1262, Found 505.1263.

### 11-Chloro-7,13-diphenylbenzo[*b*]fluorantheno[8,9-*d*]thiophene **3p**

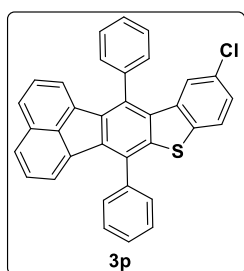

To a solution of cyclopentadienone **1e** (0.18 g, 0.50 mmol) in xylenes (10 mL), 5-chlorobenzo[*b*]thiophene *S,S*-dioxide **2e** (0.10 g, 0.50 mmol) was added and refluxed for 24 h. Subsequent removal of solvent followed by column chromatographic purification on silica gel afforded dibenzothiophene **3p** (0.16 g, 63%) as a green solid.  $R_f$  = 0.20 (eluent: 2% ethyl acetate in hexane); mp 276-278 °C; <sup>1</sup>H-NMR (300 MHz, CDCl<sub>3</sub>):  $\delta$  7.78-7.63 (m, 13H, ArH), 7.41-7.28 (m, 3H, ArH), 7.70 (d,  $J$  = 6.9 Hz, 1H, ArH), 6.81 (s, 1H, ArH), 6.64 (d,  $J$  = 7.2 Hz, 1H, ArH) ppm; <sup>13</sup>C-NMR (75 MHz, CDCl<sub>3</sub>):  $\delta$  142.0, 139.0, 138.79, 138.76, 137.9, 136.5, 136.0, 135.9, 135.7, 134.3, 134.1, 132.2, 131.7, 130.2, 130.1, 130.0, 129.5, 129.3, 129.1, 128.8, 128.7, 127.9, 127.7, 126.8, 126.3, 125.9, 124.8, 123.3, 122.94, 122.89 ppm; HRMS (ESI):  $m/z$  Calcd for C<sub>34</sub>H<sub>17</sub> [M-H<sub>2</sub>ClS]<sup>+</sup>: 425.1325, Found 425.2155.

### 11-Chloro-7,13-bis(4-methoxyphenyl)benzo[*b*]fluorantheno[8,9-*d*]thiophene **3q**

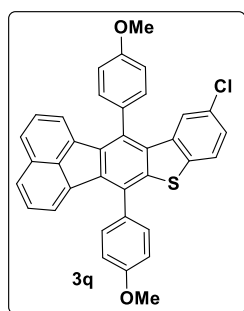

To a solution of cyclopentadienone **1g** (0.21 g, 0.50 mmol) in xylenes (10 mL), 5-chlorobenzo[*b*]thiophene *S,S*-dioxide **2e** (0.10 g, 0.50 mmol) was added and refluxed for 24 h. Subsequent removal of solvent followed by column chromatographic purification on silica gel afforded dibenzothiophene **3q** (0.15 g, 59%) as a green solid.  $R_f$  = 0.15 (eluent: 5% ethyl acetate

in hexane); mp 286-288 °C;  $^1\text{H-NMR}$  (300 MHz,  $\text{CDCl}_3$ ):  $\delta$  7.78-7.72 (m, 2H, ArH), 7.66-7.61 (m, 3H, ArH), 7.52 (d,  $J = 8.1$  Hz, 2H, ArH), 7.42-7.37 (m, 2H, ArH), 7.34-7.26 (m, 3H, ArH), 7.23-7.20 (m, 2H, ArH), 7.07 (d,  $J = 7.2$  Hz, 1H, ArH), 6.91 (s, 1H, ArH), 6.71 (d,  $J = 6.9$  Hz, 1H, ArH), 4.07 (s, 3H,  $\text{OCH}_3$ ), 4.01 (s, 3H,  $\text{OCH}_3$ ) ppm;  $^{13}\text{C-NMR}$  (75 MHz,  $\text{CDCl}_3$ ):  $\delta$  160.2, 160.1, 142.6, 138.8, 138.2, 136.8, 136.5, 136.2, 136.0, 134.1, 134.0, 132.1, 131.9, 131.2, 131.0, 130.5, 130.2, 130.1, 130.0, 127.9, 127.7, 126.7, 126.2, 125.9, 124.8, 123.3, 123.9, 115.9, 115.7, 114.9, 55.7, 55.4 ppm; HRMS (ESI):  $m/z$  Calcd for  $\text{C}_{34}\text{H}_{17} [\text{M}-\text{C}_2\text{H}_6\text{O}_2\text{ClS}]^+$ : 425.1401, Found 425.2154.

### 11-Nitro-7,13-diphenylbenzo[*b*]fluorantheno[8,9-*d*]thiophene 3r

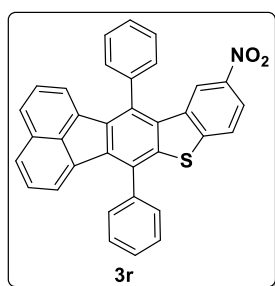

To a solution of cyclopentadienone **1e** (0.17 g, 0.47 mmol) in xylenes (10 mL), 5-nitrobenzo[*b*]thiophene *S,S*-dioxide **2f** (0.10 g, 0.47 mmol) was added and refluxed for 24 h. Subsequent removal of solvent followed by column chromatographic purification on silica gel afforded dibenzothiophene **3r** (0.11 g, 46%) as a yellow solid.  $R_f = 0.20$  (eluent: 5% ethyl acetate in hexane); mp 298-300 °C;  $^1\text{H-NMR}$  (300 MHz,  $\text{CDCl}_3$ ):  $\delta$  8.15-8.12 (m, 1H, ArH), 7.82-7.64 (m, 14H, ArH), 7.14-7.33 (m, 2H, ArH), 7.01 (d,  $J = 6.9$  Hz, 1H, ArH), 6.71 (d,  $J = 7.2$  Hz, 1H, ArH) ppm;  $^{13}\text{C-NMR}$  (75 MHz,  $\text{CDCl}_3$ ):  $\delta$  147.0, 145.3, 142.0, 138.4, 138.3, 136.8, 136.7, 136.5, 136.1, 135.4, 134.6, 134.1, 132.3, 131.7, 130.5, 130.1, 129.6, 129.2, 129.1, 128.8, 128.0, 127.8, 127.2, 126.6, 123.3, 122.7, 120.4, 120.1 ppm; HRMS (ESI):  $m/z$  Calcd for  $\text{C}_{34}\text{H}_{19}\text{NO}_2\text{S} [\text{M}]^+$ : 505.1136, Found 505.1138.

### 7,13-Bis(4-methoxyphenyl)-11-nitrobenzo[*b*]fluorantheno[8,9-*d*]thiophene 3s

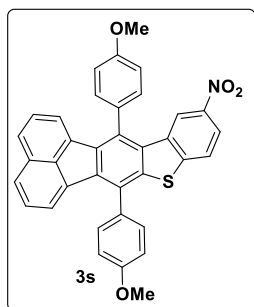

To a solution of cyclopentadienone **1g** (0.19 g, 0.47 mmol) in xylenes (10 mL), 5-nitrobenzo[*b*]thiophene *S,S*-dioxide **2f** (0.10 g, 0.47 mmol) was added and refluxed for 24 h.

Subsequent removal of solvent followed by column chromatographic purification on silica gel afforded dibenzothiophene **3s** (0.12 g, 44%) as a yellow solid.  $R_f = 0.20$  (eluent: 10% ethyl acetate in hexane); mp 288-290 °C;  $^1\text{H-NMR}$  (300 MHz,  $\text{CDCl}_3$ ):  $\delta$  8.12-8.09 (m, 1H, ArH), 7.79-7.74 (m, 4H, ArH), 7.58 (d,  $J = 8.4$  Hz, 2H, ArH), 7.49 (d,  $J = 8.4$  Hz, 2H, ArH), 7.42-7.36 (m, 2H, ArH), 7.31 (d,  $J = 8.4$  Hz, 2H, ArH), 7.18 (d,  $J = 8.4$  Hz, 2H, ArH), 7.09 (d,  $J = 7.2$  Hz, 1H, ArH), 6.83 (d,  $J = 6.9$  Hz, 1H, ArH), 4.06 (s, 3H,  $\text{OCH}_3$ ), 3.98 (s, 3H,  $\text{OCH}_3$ ) ppm;  $^{13}\text{C-NMR}$  (75 MHz,  $\text{CDCl}_3$ ):  $\delta$  160.6, 160.3, 147.0, 145.2, 142.5, 137.0, 136.9, 136.8, 136.3, 135.6, 134.2, 134.1, 132.2, 132.0, 130.6, 130.4, 130.3, 130.0, 129.9, 128.0, 127.8, 127.0, 126.5, 123.2, 123.2, 122.6, 120.4, 120.0, 116.1, 115.0, 55.8, 55.4 ppm; HRMS (ESI):  $m/z$  Calcd for  $\text{C}_{36}\text{H}_{23}\text{NO}_4\text{S}$   $[\text{M}]^+$ : 565.1348, Found 565.1353.

#### 8,9,10,11-Tetraphenyl-5-(phenylsulfonyl)-5H-benzo[4,5]thieno[3,2-c]carbazole **3t**

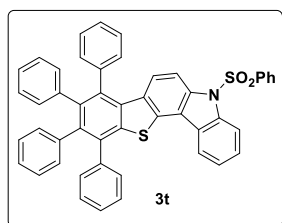

The dibenzothiophene **3t** (0.11 g, 61%) was prepared according to the general procedure using cyclopentadienone **1a** (0.09 g, 0.25 mmol) and benzo[*b*]thiophene *S,S*-dioxide **2g** (0.10 g, 0.25 mmol) as a colorless solid.  $R_f = 0.35$  (eluent: 5% ethyl acetate in hexane); mp 210-212 °C;  $^1\text{H-NMR}$  (300 MHz,  $\text{CDCl}_3$ ):  $\delta$  8.69 (d,  $J = 8.1$  Hz, 1H, ArH), 8.62 (s, 2H, ArH), 8.54-8.47 (m, 3H, ArH), 7.87-7.84 (m, 2H, ArH), 7.52-7.41 (m, 3H, ArH), 7.34-7.28 (m, 3H, ArH), 7.27-7.11 (m, 10H, ArH), 7.00-6.92 (m, 4H, ArH), 6.88 (s, 1H, ArH), 6.80-6.78 (m, 2H, ArH) ppm;  $^{13}\text{C-NMR}$  (75 MHz,  $\text{CDCl}_3$ ):  $\delta$  142.8, 142.6, 141.6, 140.5, 140.2, 139.5, 139.3, 139.2, 138.5, 134.2, 132.2, 132.0, 131.5, 131.1, 130.6, 130.4, 130.0, 129.4, 129.0, 128.4, 128.2, 127.9, 127.5, 127.2, 126.9, 126.8, 126.7, 126.5, 126.0, 125.2, 124.4, 123.6, 123.4, 122.7, 122.0, 115.6, 115.1 ppm; DEPT-135 NMR (75 MHz,  $\text{CDCl}_3$ ):  $\delta$  133.8, 131.8, 131.6, 130.0, 129.6, 129.1, 128.1, 127.7, 127.5, 126.8, 126.5, 126.4, 126.1, 125.6, 124.8, 124.0, 123.2, 123.0, 122.3, 115.2, 114.7 ppm; HRMS (ESI):  $m/z$  Calcd for  $\text{C}_{48}\text{H}_{31}\text{NO}_2\text{S}_2$   $[\text{M}+\text{H}]^+$ : 718.1874, Found 718.1887.

#### 8,15-Diphenyl-5-(phenylsulfonyl)-5H-fluorantheno[8',9':4,5]thieno[3,2-c]carbazole **3u**

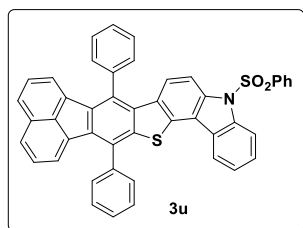

The dibenzothiophene **3u** (0.11 g, 65%) was prepared according to the general procedure using cyclopentadienone **1e** (0.09 g, 0.25 mmol) and benzo[*b*]thiophene *S,S*-dioxide **2g** (0.10 g, 0.25 mmol) as a green solid.  $R_f = 0.35$  (eluent: 5% ethyl acetate in hexane); mp 174-176 °C;  $^1\text{H-NMR}$  (300 MHz,  $\text{CDCl}_3$ ):  $\delta$  9.27 (d,  $J = 4.5$  Hz, 1H, ArH), 8.72-8.72 (m, 1H, ArH), 8.70-8.54 (m, 2H, ArH), 8.52 (d,  $J = 9.0$  Hz, 1H, ArH), 8.41 (d,  $J = 4.8$  Hz, 1H, ArH), 8.26 (s, 1H, ArH), 7.98-7.87 (m, 3H, ArH), 7.78-7.70 (m, 3H, ArH), 7.69-7.65 (m, 3H, ArH), 7.55-7.50 (m, 3H, ArH), 7.49-7.43 (m, 2H, ArH), 7.37-7.31 (m, 4H, ArH), 7.18 (s, 1H, ArH), 7.12 (d, 1H, ArH) ppm;  $^{13}\text{C-NMR}$  (75 MHz,  $\text{CDCl}_3$ ):  $\delta$  137.5, 136.7, 136.3, 135.6, 133.9, 132.7, 130.4, 130.1, 130.0, 129.9, 129.6, 129.5, 129.3, 129.2, 129.1, 128.7, 128.1, 128.0, 127.9, 127.6, 127.4, 127.3, 127.2, 127.1, 127.0, 126.7, 126.6, 126.5, 126.4, 124.3, 123.8, 123.7, 123.4, 123.3, 123.1, 122.9, 122.7, 122.5, 121.7, 115.2, 114.9 ppm; HRMS (ESI):  $m/z$  Calcd for  $\text{C}_{46}\text{H}_{27}\text{NO}_2\text{S}_2$   $[\text{M}+\text{H}]^+$ : 690.1561, Found 690.1572.

**8,15-Bis(4-bromophenyl)-5-(phenylsulfonyl)-5H-fluorantheno[8',9':4,5]thieno[3,2-*c*]carbazole 3v**

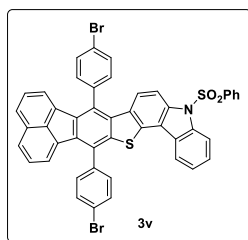

The dibenzothiophene **3v** (0.14 g, 67%) was prepared according to the general procedure using cyclopentadienone **1f** (0.13 g, 0.25 mmol) and benzo[*b*]thiophene *S,S*-dioxide **2g** (0.10 g, 0.25 mmol) as a green solid.  $R_f = 0.30$  (eluent: 10% ethyl acetate in hexane); mp 240-242 °C;  $^1\text{H-NMR}$  (300 MHz,  $\text{CDCl}_3$ ):  $\delta$  8.30 (d,  $J = 8.9$  Hz, 1H, ArH), 8.11 (d,  $J = 8.7$  Hz, 1H, ArH), 7.80-7.68 (m, 7H, ArH), 7.60-7.57 (m, 2H, ArH), 7.50-7.45 (m, 4H, ArH), 7.42-7.31 (m, 6H, ArH), 7.25-7.20 (m, 3H, ArH), 6.82 (d,  $J = 7.2$  Hz, 1H, ArH) ppm;  $^{13}\text{C-NMR}$  (75 MHz,  $\text{CDCl}_3$ ):  $\delta$  138.2, 138.0, 137.7, 137.0, 136.9, 136.6, 136.0, 135.9, 135.4, 135.2, 133.8, 132.1, 131.9, 131.7, 130.8, 129.5, 129.0, 127.80, 127.74, 127.5, 127.1, 126.5, 126.3, 124.1, 123.4, 123.0, 122.1, 121.5, 121.1, 119.9, 113.3, 114.4 ppm; DEPT-135 NMR (75 MHz,  $\text{CDCl}_3$ ):  $\delta$  133.7, 132.1, 131.9, 131.7, 130.9, 130.8, 129.5, 129.0, 127.8, 127.7, 127.5, 127.1, 126.5, 124.1, 123.4, 123.1, 121.1, 119.9, 115.3, 114.4 ppm; HRMS (ESI):  $m/z$  Calcd for  $\text{C}_{46}\text{H}_{25}\text{Br}_2\text{NO}_2\text{S}_2$   $[\text{M}+\text{H}]^+$ : 845.9772, Found 845.9792.

**2,5-Dimethoxy-3',4',5'-triphenyl-1,1':2',1''-terphenyl 4d**

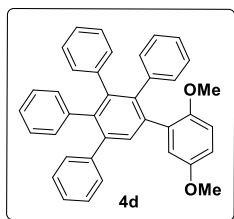

The pentaaryl **4d** (0.16 g, 67%) was prepared following the general procedure using cyclopentadienone **1a** (0.17 g, 0.44 mmol) and benzo[*b*]thiophene *S,S*-dioxide **2c** (0.10 g, 0.44 mmol) as a colorless solid.  $R_f$  = 0.15 (eluent: 10% ethyl acetate in hexane); mp 220-222 °C;  $^1\text{H}$ -NMR (300 MHz,  $\text{CDCl}_3$ ):  $\delta$  9.45 (s, 1H, ArH), 9.03 (d,  $J$  = 8.4 Hz, 1H, ArH) 7.39 (d,  $J$  = 8.4 Hz, 1H, ArH) 7.17-7.15 (m, 2H, ArH), 7.08-7.02 (m, 7H, ArH), 7.00-6.91 (m, 5H, ArH), 6.87-6.81 (m, 5H, ArH), 6.72-6.69 (m, 2H, ArH), 3.93 (s, 3H,  $\text{OCH}_3$ ), 3.89 (s, 3H,  $\text{OCH}_3$ ) ppm;  $^{13}\text{C}$ -NMR (75 MHz,  $\text{CDCl}_3$ ):  $\delta$  152.6, 152.0, 142.99, 142.96, 140.4, 140.1, 138.3, 132.2, 131.7, 130.7, 130.7, 130.5, 130.2, 129.8, 129.6, 128.4, 127.8, 127.4, 127.1, 126.8, 126.0, 125.6, 125.5, 124.8, 124.0, 123.2, 111.6, 111.4, 57.0 ( $\text{OCH}_3$ ), 56.8 ( $\text{OCH}_3$ ) ppm; DEPT-135 NMR (75 MHz,  $\text{CDCl}_3$ ):  $\delta$  132.1, 131.7, 130.1, 129.7, 128.4, 127.7, 127.3, 127.0, 126.7, 125.9, 125.9, 125.5, 125.4, 124.8, 111.5, 111.3, 56.9, 56.7 ppm; HRMS (ESI):  $m/z$  Calcd for  $\text{C}_{38}\text{H}_{30}\text{O}_2$   $[\text{M}]^+$ : 518.2246, Found 518.2217.

#### 6,9-Dimethoxy-1,4-bis(4-methoxyphenyl)-2,3-diphenyldibenzo[*b,d*]thiophene **4e**

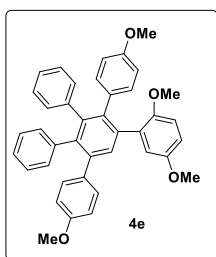

The pentaarylbenzene **4e** (0.17 g, 68%) was prepared according to the general procedure using cyclopentadienone **1b** (0.19 g, 0.44 mmol) and benzo[*b*]thiophene *S,S*-dioxide **2c** (0.10 g, 0.44 mmol) as a colorless solid.  $R_f$  = 0.25 (eluent: 20% ethyl acetate in hexane); mp 246-248 °C;  $^1\text{H}$ -NMR (300 MHz,  $\text{CDCl}_3$ ):  $\delta$  7.40 (s, 1H, ArH), 7.13 (s, 1H, ArH), 6.98 (d,  $J$  = 8.7 Hz, 2H, ArH), 6.83-6.82 (m, 8H, ArH), 6.77-6.75 (m, 3H, ArH), 6.69-6.57 (m, 4H, ArH), 6.52-6.49 (m, 1H, ArH), 6.33 (d,  $J$  = 8.7 Hz, 2H, ArH), 3.61 (s, 3H,  $\text{OCH}_3$ ), 3.57 (s, 3H,  $\text{OCH}_3$ ), 3.50 (s, 3H,  $\text{OCH}_3$ ), 3.32 (s, 3H,  $\text{OCH}_3$ ) ppm;  $^{13}\text{C}$ -NMR (75 MHz,  $\text{CDCl}_3$ ):  $\delta$  158.0, 157.2, 153.0, 150.6, 141.4, 140.7, 140.4, 139.7, 139.6, 139.2, 137.8, 134.3, 132.8, 131.7, 131.6, 131.1, 126.9, 126.7, 126.5, 125.5, 125.2, 117.4, 113.5, 113.0, 111.4, 55.7 ( $\text{OCH}_3$ ), 55.6 ( $\text{OCH}_3$ ), 55.1 ( $\text{OCH}_3$ ), 54.9 ( $\text{OCH}_3$ ) ppm; DEPT-135 NMR (75 MHz,  $\text{CDCl}_3$ ):  $\delta$  131.6, 131.1, 126.9, 126.7, 125.5, 125.2, 117.3, 113.5,

113.0, 111.4, 55.7, 55.6, 55.1, 54.9 ppm; HRMS (ESI):  $m/z$  Calcd for  $C_{40}H_{34}O_4$   $[M+H]^+$ : 579.2535, Found 579.2551.

#### 8-(3,4-Dimethoxyphenyl)-7,10-bis(4-methoxyphenyl)fluoranthene **4f**

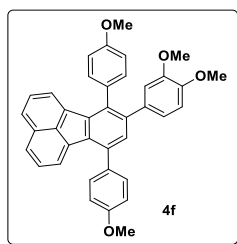

The dibenzothiophene **4f** (0.18 g, 72%) was prepared following the general procedure using cyclopentadienone **1g** (0.18 g, 0.43 mmol) and benzo[*b*]thiophene *S,S*-dioxide **2b** (0.10 g, 0.44 mmol) as a green solid.  $R_f$  = 0.35 (eluent: 20% ethyl acetate in hexane); mp 207-209 °C;  $^1H$ -NMR (300 MHz,  $CDCl_3$ ):  $\delta$  7.75-7.71 (m, 2H, ArH), 7.64 (d,  $J$  = 8.7 Hz, 2H, ArH), 7.59 (d,  $J$  = 8.4 Hz, 2H, ArH), 7.41-7.33 (m, 3H, ArH), 7.29 (d,  $J$  = 8.1 Hz, 3H, ArH), 7.23-7.17 (m, 3H, ArH), 7.04 (d,  $J$  = 6.9 Hz, 1H, ArH), 6.76 (d,  $J$  = 6.9 Hz, 1H, ArH), 6.48 (s, 1H, ArH), 4.02 (s, 3H,  $OCH_3$ ), 4.01 (s, 3H,  $OCH_3$ ), 3.93 (s, 3H,  $OCH_3$ ), 3.50 (s, 3H,  $OCH_3$ ) ppm;  $^{13}C$ -NMR (75 MHz,  $CDCl_3$ ):  $\delta$  146.9, 141.3, 136.9, 135.8, 134.3, 133.8, 133.2, 133.0, 132.5, 131.9, 131.6, 131.2, 130.8, 130.4, 129.9, 129.7, 127.8, 127.7, 126.2, 125.9, 122.5, 122.4, 115.2, 114.7, 106.8, 104.1, 56.0 ( $OCH_3$ ), 55.6 ( $OCH_3$ ), 55.4 ( $OCH_3$ ), 55.2 ( $OCH_3$ ) ppm; DEPT-135 NMR (75 MHz,  $CDCl_3$ ):  $\delta$  130.9, 130.5, 127.9, 127.7, 126.2, 125.9, 122.5, 122.4, 115.2, 114.7, 106.8, 104.0, 56.1, 55.6, 55.4, 55.2 ppm; HRMS (EI):  $m/z$  Calcd for  $C_{38}H_{30}O_4$   $[M+H]^+$ : 551.2222, Found 551.2241.

#### 7,8,10-Tris(3,4-dimethoxyphenyl)fluoranthene **4g**

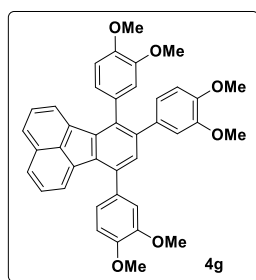

The fluoranthene **4g** (0.20 g, 71%) was prepared according to the general procedure using cyclopentadienone **1h** (0.21 g, 0.44 mmol) and benzo[*b*]thiophene *S,S*-dioxide **2b** (0.10 g, 0.44 mmol) as a green solid.  $R_f$  = 0.36 (eluent: 25% ethyl acetate in hexane); mp 212-214 °C;  $^1H$ -NMR (300 MHz,  $CDCl_3$ ):  $\delta$  7.75-7.71 (m, 2H, ArH), 7.40-7.33 (m, 3H, ArH), 7.29-7.22 (m, 4H, ArH), 7.20-7.14 (m, 3H, ArH), 7.07 (d,  $J$  = 7.2 Hz, 1H, ArH), 6.91 (d,  $J$  = 9.3 Hz 1H, ArH), 6.79 (d,  $J$  = 7.2 Hz, 1H, ArH), 6.48 (s, 1H, ArH), 4.07 (s, 3H,  $OCH_3$ ), 3.92 (s, 3H,  $OCH_3$ ), 3.91

(s, 3H, OCH<sub>3</sub>), 3.90 (s, 3H, OCH<sub>3</sub>) 3.87 (s, 3H, OCH<sub>3</sub>), 3.49 (s, 3H, OCH<sub>3</sub>) ppm; <sup>13</sup>C-NMR (75 MHz, CDCl<sub>3</sub>): δ 149.0, 148.7, 147.0, 141.1, 136.7, 136.1, 135.7, 134.2, 133.8, 133.2, 132.6, 132.0, 131.8, 131.4, 129.9, 129.6, 127.9, 127.8, 126.3, 126.1, 122.63, 122.55, 121.6, 121.5, 121.4, 112.4, 112.2, 111.8, 111.8, 106.8, 104.1, 56.3 (OCH<sub>3</sub>), 56.1 (OCH<sub>3</sub>), 56.0 (OCH<sub>3</sub>), 55.3 (OCH<sub>3</sub>) ppm; DEPT-135 NMR (75 MHz, CDCl<sub>3</sub>): δ 127.9, 127.8, 126.3, 126.1, 122.6, 122.5, 121.6, 121.4, 121.4, 112.4, 112.3, 111.7, 106.8, 104.0, 56.2, 56.1, 55.9, 55.2 ppm; HRMS (EI): *m/z* Calcd for C<sub>40</sub>H<sub>34</sub>O<sub>6</sub> [M+H]<sup>+</sup>: 611.2434, Found 611.2448.

#### 7,10-Bis(4-methoxyphenyl)-8-phenylfluoranthene **4h**

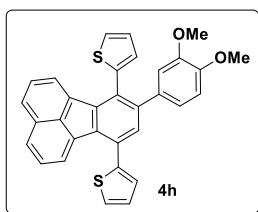

The fluoranthene **4h** (0.16 g, 72%) was prepared according to the general procedure using cyclopentadienone **1i** (0.16 g, 0.44 mmol) and benzo[*b*]thiophene *S,S*-dioxide **2b** (0.10 g, 0.44 mmol) as a green solid. *R*<sub>f</sub> = 0.18 (eluent: 10% ethyl acetate in hexane); mp 218-220 °C; <sup>1</sup>H-NMR (300 MHz, CDCl<sub>3</sub>): δ 7.78-7.76 (m, 2H, ArH), 7.52-7.48 (m, 2H, ArH), 7.45-7.37 (m, 5H, ArH), 7.25-7.22 (m, 1H, ArH), 7.14-7.07 (m, 2H, ArH), 6.95-6.77 (m, 4H, ArH), 3.85 (s, 3H, OCH<sub>3</sub>), 3.70 (s, 3H, OCH<sub>3</sub>) ppm; <sup>13</sup>C-NMR (75 MHz, CDCl<sub>3</sub>): δ 147.9, 141.8, 141.3, 140.3, 140.1, 136.8, 136.0, 135.4, 133.2, 133.0, 131.9, 131.1, 129.7, 129.0, 128.1, 127.8, 127.7, 127.4, 127.2, 127.1, 126.9, 126.6, 126.0, 123.6, 123.1, 121.9, 113.0, 110.6, 55.8 (OCH<sub>3</sub>) ppm; DEPT-135 NMR (75 MHz, CDCl<sub>3</sub>): δ 131.9, 128.2, 127.8, 127.5, 127.2, 127.0, 126.6, 126.1, 123.7, 123.2, 122.0, 113.0, 110.6, 55.8 ppm; HRMS (ESI): *m/z* Calcd for C<sub>32</sub>H<sub>22</sub>O<sub>2</sub>S<sub>2</sub> [M+H]<sup>+</sup>: 503.1139, Found 503.1151.

#### 8-(2,5-Dimethoxyphenyl)-7,10-bis(4-methoxyphenyl)fluoranthene **4i**

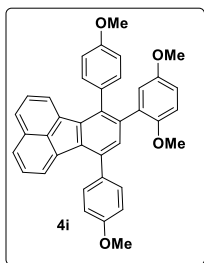

The fluoranthene **4i** (0.19 g, 76%) was prepared following the general procedure using cyclopentadienone **1g** (0.18 g, 0.44 mmol) and benzo[*b*]thiophene *S,S*-dioxide **2c** (0.10 g, 0.44 mmol) as a green solid. *R*<sub>f</sub> = 0.30 (eluent: 20% ethyl acetate in hexane); mp 194-196 °C; <sup>1</sup>H-NMR (300 MHz, CDCl<sub>3</sub>): δ 8.02 (d, *J* = 7.2 Hz, 1H, ArH), 7.85-7.77 (m, 2H, ArH), 7.75-7.69

(m, 2H, ArH), 7.65-7.55 (m, 2H, ArH), 7.39-7.36 (m, 1H, ArH), 7.33-7.28 (m, 2H, ArH), 7.24 (s, 1H, ArH), 7.08-7.04 (m, 2H, ArH), 6.87 (d,  $J = 8.4$  Hz, 1H, ArH), 6.81 (d,  $J = 7.2$  Hz, 1H, ArH), 6.76-6.69 (m, 2H, ArH), 6.45-6.61 (m, 1H, ArH), 3.93 (s, 3H, OCH<sub>3</sub>), 3.85 (s, 3H, OCH<sub>3</sub>), 3.69 (s, 3H, OCH<sub>3</sub>), 3.53 (s, 3H, OCH<sub>3</sub>) ppm; <sup>13</sup>C-NMR (75 MHz, CDCl<sub>3</sub>):  $\delta$  159.6, 159.2, 158.6, 152.9, 150.9, 138.1, 138.0, 137.1, 136.8, 136.7, 136.3, 136.0, 133.2, 133.1, 131.8, 131.5, 131.1, 130.9, 130.4, 130.3, 129.7, 128.4, 127.6, 127.5, 126.4, 123.2, 122.7, 120.4, 117.4, 114.1, 113.9, 113.2, 113.2, 111.4, 55.7 (OCH<sub>3</sub>), 55.7 (OCH<sub>3</sub>), 55.4 (OCH<sub>3</sub>), 55.2 (OCH<sub>3</sub>) ppm; DEPT-135 NMR (75 MHz, CDCl<sub>3</sub>):  $\delta$  131.5, 130.9, 130.4, 130.4, 127.6, 127.5, 126.4, 123.2, 122.8, 120.5, 117.4, 114.1, 113.9, 113.25, 113.19, 111.3, 55.7, 55.4, 55.2 ppm; HRMS (ESI):  $m/z$  Calcd for C<sub>38</sub>H<sub>30</sub>O<sub>4</sub> [M+H]<sup>+</sup>: 551.2222, Found 551.2244.

#### 8-(2,5-Dimethoxyphenyl)-7,10-bis(3,4-dimethoxyphenyl)fluoranthene **4j**

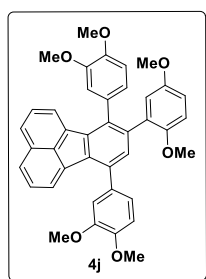

The fluoranthene **4j** (0.20 g, 71%) was prepared according to the general procedure using cyclopentadienone **1h** (0.21 g, 0.44 mmol) and benzo[*b*]thiophene *S,S*-dioxide **2c** (0.10 g, 0.44 mmol) as a green solid.  $R_f = 0.20$  (eluent: 25% ethyl acetate in hexane); mp 240-242 °C; <sup>1</sup>H-NMR (300 MHz, CDCl<sub>3</sub>):  $\delta$  7.74-7.69 (m, 2H, ArH), 7.39-7.31 (m, 3H, ArH), 7.29-7.24 (m, 3H, ArH), 7.06-7.03 (m, 1H, ArH), 6.97-6.84 (m, 4H, ArH), 6.75-6.69 (m, 3H, ArH), 3.99 (s, 3H OCH<sub>3</sub>), 3.91 (s, 3H, OCH<sub>3</sub>), 3.89 (s, 3H, OCH<sub>3</sub>), 6.67 (s, 3H, OCH<sub>3</sub>), 3.68 (s, 3H, OCH<sub>3</sub>), 3.56 (s, 3H, OCH<sub>3</sub>) ppm; <sup>13</sup>C-NMR (75 MHz, CDCl<sub>3</sub>):  $\delta$  149.6, 148.9, 148.6, 148.2, 138.0, 137.3, 136.8, 136.8, 136.3, 136.1, 133.7, 133.1, 132.0, 131.3, 131.3, 129.8, 127.6, 127.4, 126.5, 123.3, 122.9, 122.3, 121.4, 117.7, 113.7, 113.3, 113.0, 111.7, 111.6, 111.0, 56.1 (OCH<sub>3</sub>), 56.0 (OCH<sub>3</sub>), 55.8 (OCH<sub>3</sub>), 55.7 (OCH<sub>3</sub>) ppm; DEPT-135 NMR (75 MHz, CDCl<sub>3</sub>):  $\delta$  131.3, 127.6, 127.4, 126.5, 123.3, 122.8, 122.3, 121.4, 117.7, 113.7, 113.3, 113.0, 111.7, 111.5, 110.9, 56.0, 55.9, 55.8, 55.8 ppm; HRMS (EI):  $m/z$  Calcd for C<sub>40</sub>H<sub>34</sub>O<sub>6</sub> [M+H]<sup>+</sup>: 611.2434, Found 611.2444.

#### 2,2'-(8-(2,5-Dimethoxyphenyl)fluoranthene-7,10-diyl)dithiophene **4k**

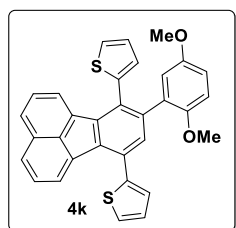



The fluoranthene **4k** (0.16 g, 73%) was prepared according to the general procedure using cyclopentadienone **1i** (0.16 g, 0.44 mmol) and benzo[*b*]thiophene *S,S*-dioxide **2c** (0.10 g, 0.44 mmol) as a green solid.  $R_f = 0.25$  (eluent: 10% ethyl acetate in hexane); mp 132-134 °C;  $^1\text{H-NMR}$  (300 MHz,  $\text{CDCl}_3$ ):  $\delta$  7.71-7.66 (m, 2H, ArH), 7.46 (d,  $J = 6.9$  Hz, 1H, ArH), 7.40-7.37 (m, 3H, ArH), 7.34-7.22 (m, 3H, ArH), 7.16-7.14 (m, 1H, ArH), 6.96 (d,  $J = 3.3$  Hz, 2H, ArH), 6.75 (d,  $J = 7.2$  Hz, 1H, ArH), 6.70-6.69 (m, 1H, ArH), 6.66-6.61 (m, 2H, ArH), 3.62 (s, 3H,  $\text{OCH}_3$ ), 3.56 (s, 3H,  $\text{OCH}_3$ ) ppm;  $^{13}\text{C-NMR}$  (75 MHz,  $\text{CDCl}_3$ ):  $\delta$  152.8, 151.0, 141.4, 139.9, 139.5, 139.1, 137.0, 136.0, 135.6, 132.9, 132.0, 130.6, 130.3, 130.2, 129.7, 127.7, 127.6, 127.4, 127.2, 126.9, 126.6, 125.9, 125.8, 123.3, 123.0, 117.1, 113.6, 111.4, 55.8 ( $\text{OCH}_3$ ), 55.7 ( $\text{OCH}_3$ ) ppm; DEPT-135 NMR (75 MHz,  $\text{CDCl}_3$ ):  $\delta$  132.0, 127.7, 127.6, 127.4, 127.2, 126.9, 126.6, 125.9, 125.8, 123.3, 123.0, 117.1, 113.6, 111.4, 55.8, 55.7 ppm; HRMS (ESI):  $m/z$  Calcd for  $\text{C}_{32}\text{H}_{22}\text{O}_2\text{S}_2$   $[\text{M}+\text{H}]^+$ : 503.1139, Found 503.1136.

#### 5-(7,10-Bis(4-methoxyphenyl)fluoranthen-8-yl)benzo[*d*][1,3]dioxole **4l**

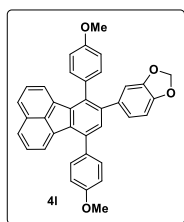

The fluoranthene **4l** (0.18 g, 71%) was prepared according to the general procedure using cyclopentadienone **1g** (0.19 g, 0.46 mmol) and benzo[*b*]thiophene *S,S*-dioxide **2d** (0.10 g, 0.46 mmol) as a green solid.  $R_f = 0.30$  (eluent: 10% ethyl acetate in hexane); mp 176-178 °C;  $^1\text{H-NMR}$  (300 MHz,  $\text{CDCl}_3$ ):  $\delta$  8.03-7.89 (m, 1H, ArH), 7.58-7.55 (m, 2H, ArH), 7.48 (d,  $J = 7.8$  Hz, 2H, ArH), 7.24-7.11 (m, 6H, ArH), 6.94 (d,  $J = 7.8$  Hz, 2H, ArH), 6.82 (d,  $J = 7.8$  Hz, 2H, ArH), 6.64-6.52 (m, 3H, ArH), 5.74 (s, 2H,  $\text{OCH}_2$ ), 3.78 (s, 3H,  $\text{OCH}_3$ ), 3.73 (s, 3H,  $\text{OCH}_3$ ) ppm;  $^{13}\text{C-NMR}$  (75 MHz,  $\text{CDCl}_3$ ):  $\delta$  159.3, 158.8, 146.9, 146.0, 140.7, 138.6, 137.5, 136.8, 136.1, 135.7, 135.2, 133.1, 132.5, 131.6, 131.34, 131.30, 130.2, 129.7, 128.3, 127.6, 127.5, 126.5, 123.5, 123.3, 122.8, 121.9, 114.02, 113.99, 110.5, 107.6, 100.8 ( $\text{OCH}_2$ ), 55.4 ( $\text{OCH}_3$ ), 55.2 ( $\text{OCH}_3$ ) ppm; DEPT-135 NMR (75 MHz,  $\text{CDCl}_3$ ):  $\delta$  131.4, 131.3, 127.7, 127.6, 126.6, 126.6, 123.6, 123.3, 122.8, 114.0, 110.5, 107.6, 100.8, 55.4, 55.2 ppm; HRMS (ESI):  $m/z$  Calcd for  $\text{C}_{37}\text{H}_{26}\text{O}_4$   $[\text{M}+\text{H}]^+$ : 535.1909, Found 535.1906.

#### 5-(7,10-Bis(3,4-dimethoxyphenyl)fluoranthen-8-yl)benzo[*d*][1,3]dioxole **4m**

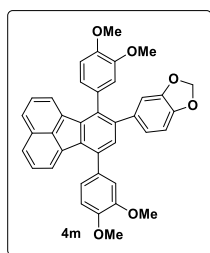

The fluoranthene **4m** (0.17 g, 61%) was prepared according to the general procedure using cyclopentadienone **1h** (0.23 g, 0.47 mmol) and benzo[*b*]thiophene *S,S*-dioxide **2d** (0.10 g, 0.47 mmol) as a green solid.  $R_f$  = 0.25 (eluent: 20% ethyl acetate in hexane); mp 215-217 °C;  $^1\text{H}$ -NMR (300 MHz,  $\text{CDCl}_3$ ):  $\delta$  7.67-7.63 (m, 2H, ArH), 7.31-7.25 (m, 2H, ArH), 7.22-7.14 (m, 4H, ArH), 6.99-6.96 (m, 2H, ArH), 6.86 (s, 2H, ArH), 6.79-6.77 (m, 2H, ArH), 6.66-6.63 (m, 1H, ArH), 6.59-6.56 (m, 1H, ArH), 5.81 (s, 2H,  $\text{OCH}_2$ ), 3.93 (s, 3H,  $\text{OCH}_3$ ), 3.89 (s, 3H,  $\text{OCH}_3$ ), 3.82 (s, 3H,  $\text{OCH}_3$ ), 3.66 (s, 3H,  $\text{OCH}_3$ ) ppm;  $^{13}\text{C}$ -NMR (75 MHz,  $\text{CDCl}_3$ ):  $\delta$  149.2, 148.9, 148.5, 146.9, 146.2, 140.7, 138.5, 137.6, 136.7, 136.0, 135.8, 135.3, 133.6, 133.2, 131.8, 131.1, 129.8, 127.6, 127.5, 126.6, 126.6, 123.4, 123.3, 122.9, 122.7, 121.3, 113.9, 112.8, 111.8, 111.5, 110.4, 107.6, 100.8 ( $\text{OCH}_2$ ), 56.1 ( $\text{OCH}_3$ ), 56.0 ( $\text{OCH}_3$ ), 55.9 ( $\text{OCH}_3$ ), 55.9 ( $\text{OCH}_3$ ) ppm; DEPT-135 NMR (75 MHz,  $\text{CDCl}_3$ ):  $\delta$  131.1, 127.6, 127.5, 126.6, 123.4, 123.3, 122.9, 122.6, 121.3, 113.9, 112.8, 111.7, 111.5, 110.4, 108.5, 107.6, 100.8, 56.1, 56.0, 55.9, 55.9 ppm; HRMS (ESI):  $m/z$  Calcd for  $\text{C}_{39}\text{H}_{30}\text{O}_6$   $[\text{M}+\text{H}]^+$ : 595.2121, Found 595.2137.

#### 5-(7,10-Di(thiophen-2-yl)fluoranthene-8-yl)benzo[*d*][1,3]dioxole **4n**

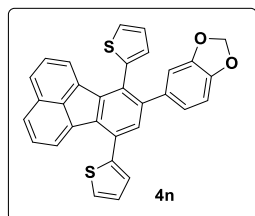

The fluoranthene **4n** (0.17 g, 71%) was prepared according to the general procedure using cyclopentadienone **1i** (0.17 g, 0.47 mmol) and benzo[*b*]thiophene *S,S*-dioxide **2d** (0.10 g, 0.47 mmol) as a green solid.  $R_f$  = 0.35 (eluent: 5% ethyl acetate in hexane); mp 224-226 °C;  $^1\text{H}$ -NMR (300 MHz,  $\text{CDCl}_3$ ):  $\delta$  7.80-7.76 (m, 2H, ArH), 7.52-7.50 (m, 2H, ArH), 7.46-7.36 (m, 6H, ArH), 7.24-7.23 (m, 1H, ArH), 7.16-7.13 (m, 1H, ArH), 7.10-7.09 (m, 1H, ArH), 6.85-6.79 (m, 2H, ArH), 6.72-6.69 (m, 1H, ArH), 5.93 (s, 2H,  $\text{OCH}_2$ ) ppm;  $^{13}\text{C}$ -NMR (75 MHz,  $\text{CDCl}_3$ ):  $\delta$  147.0, 146.4, 141.8, 141.2, 140.2, 139.6, 136.8, 135.9, 135.3, 134.5, 133.0, 131.9, 130.9, 129.7, 129.1, 128.1, 127.8, 127.6, 127.3, 127.1, 127.0, 126.9, 126.5, 126.0, 123.5, 123.2, 123.1, 110.1, 107.6, 100.9 ( $\text{OCH}_2$ ) ppm; DEPT-135 NMR (75 MHz,  $\text{CDCl}_3$ ):  $\delta$  131.9, 128.1, 127.8, 127.6,

127.3, 127.1, 127.0, 126.9, 126.5, 126.0, 123.5, 123.2, 123.1, 110.1, 107.6, 110.9 ppm; HRMS (ESI):  $m/z$  Calcd for  $C_{31}H_{18}O_2S_2 [M+H]^+$ : 487.0826, Found 487.0817.

#### 4-(7,10-Bis(4-methoxyphenyl)fluoranthen-8-yl)-9-(phenylsulfonyl)-9H-carbazole **4o**

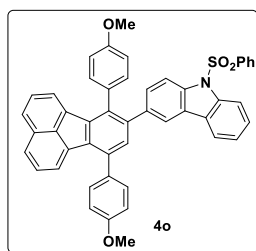

The fluoranthene **4o** (0.13 g, 72%) was prepared according to the general procedure using cyclopentadienone **1g** (0.10 g, 0.25 mmol) and benzo[*b*]thiophene *S,S*-dioxide **2e** (0.10 g, 0.25 mmol) as a green solid.  $R_f$  = 0.25 (eluent: 15% ethyl acetate in hexane); mp 220-212 °C;  $^1H$ -NMR (300 MHz,  $CDCl_3$ ):  $\delta$  8.29 (d,  $J$  = 8.1 Hz, 1H, ArH), 8.09 (d,  $J$  = 8.4 Hz, 1H, ArH), 7.79-7.72 (m, 6H, ArH), 7.63 (d,  $J$  = 8.7 Hz, 2H, ArH), 7.48-7.43 (m, 2H, ArH), 7.40-7.38 (m, 2H, ArH), 7.35-7.29 (m, 6H, ArH), 7.25-7.23 (m, 2H, ArH), 7.09 (d,  $J$  = 8.7 Hz, 2H, ArH), 6.89-6.83 (m, 3H, ArH), 3.93 (s, 3H, OCH<sub>3</sub>), 3.84 (s, 3H, OCH<sub>3</sub>) ppm;  $^{13}C$ -NMR (75 MHz,  $CDCl_3$ ):  $\delta$  159.4, 158.8, 140.6, 138.4, 137.8, 137.6, 137.4, 136.9, 136.8, 136.1, 136.0, 135.9, 133.7, 133.2, 133.1, 131.4, 131.44, 131.36, 130.3, 129.8, 129.7, 129.0, 127.7, 127.6, 127.3, 126.6, 126.5, 126.1, 124.0, 123.4, 122.9, 121.2, 120.0, 115.2, 114.2, 114.1, 113.9, 55.4 (OCH<sub>3</sub>), 55.2 (OCH<sub>3</sub>) ppm; DEPT-135 NMR (75 MHz,  $CDCl_3$ ):  $\delta$  133.7, 131.4, 131.4, 130.3, 129.7, 129.0, 127.7, 127.6, 127.3, 126.7, 126.5, 124.0, 123.4, 122.9, 121.2, 120.0, 115.2, 114.2, 114.1, 113.9 ppm; HRMS (ESI):  $m/z$  Calcd for  $C_{48}H_{33}NO_4S [M+H]^+$ : 720.2209, Found 720.2214.

#### 4-(7,10-Bis(3,4-dimethoxyphenyl)fluoranthen-8-yl)-9-(phenylsulfonyl)-9H-carbazole **4p**

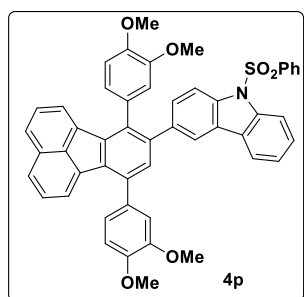

The fluoranthene **4p** (0.10 g, 63%) was prepared according to the general procedure using cyclopentadienone **1h** (0.12 g, 0.25 mmol) and benzo[*b*]thiophene *S,S*-dioxide **2e** (0.12 g, 0.25 mmol) as a green solid.  $R_f$  = 0.30 (eluent: 25% ethyl acetate in hexane); mp 152-154 °C;  $^1H$ -NMR (300 MHz,  $CDCl_3$ ):  $\delta$  8.30 (d,  $J$  = 8.4 Hz, 1H, ArH), 8.13 (d,  $J$  = 8.7 Hz, 1H, ArH), 7.83-7.75 (m, 6H, ArH), 7.48-7.39 (m, 5H, ArH), 7.350-7.250 (m, 7H, ArH), 7.07 (d,  $J$  = 7.8 Hz, 1H, ArH), 6.97-6.83 (m, 4H, ArH), 4.01 (s, 3H, OCH<sub>3</sub>), 3.92 (s, 3H, OCH<sub>3</sub>), 3.90 (s, 3H, OCH<sub>3</sub>),

3.59 (s, 3H, OCH<sub>3</sub>) ppm; <sup>13</sup>C-NMR (75 MHz, CDCl<sub>3</sub>): δ 149.4, 149.2, 148.7, 140.6, 138.9, 138.2, 137.9, 137.5, 136.8, 136.2, 133.8, 133.7, 133.4, 131.9, 131.3, 130.0, 129.6, 129.1, 127.8, 127.7, 127.4, 126.9, 126.7, 126.5, 126.2, 124.1, 123.6, 123.2, 123.0, 121.4, 121.2, 119.9, 115.4, 114.4, 114.2, 113.0, 111.9, 111.7, 56.2 (OCH<sub>3</sub>), 56.1 (OCH<sub>3</sub>) ppm; DEPT-135 NMR (75 MHz, CDCl<sub>3</sub>): δ 133.8, 131.2, 129.9, 129.0, 127.7, 127.6, 127.4, 126.7, 126.4, 124.0, 123.6, 123.0, 122.7, 121.2, 121.0, 119.8, 115.2, 114.2, 113.5, 112.4, 111.4, 111.1, 56.0, 55.8 ppm; HRMS (ESI): *m/z* Calcd for C<sub>50</sub>H<sub>37</sub>NO<sub>6</sub>S [M+H]<sup>+</sup>: 780.2420, Found 780.2432.

#### 4-(7,10-Di(thiophen-2-yl)fluoranthen-8-yl)-9-(phenylsulfonyl)-9H-carbazole **4q**

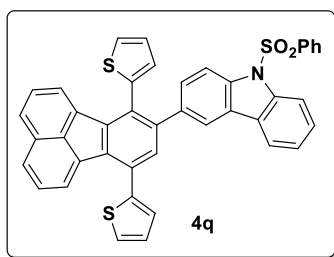

The fluoranthene **4q** (0.11 g, 65%) was prepared according to the general procedure using cyclopentadienone **1i** (0.09 g, 0.25 mmol) and benzo[*b*]thiophene *S,S*-dioxide **2e** (0.10 g, 0.25 mmol) as a green solid. *R*<sub>f</sub> = 0.35 (eluent: 5% ethyl acetate in hexane); mp 139-142 °C; <sup>1</sup>H-NMR (300 MHz, CDCl<sub>3</sub>): δ 8.22 (d, *J* = 8.4 Hz, 1H, ArH), 8.10 (d, *J* = 8.4 Hz, 1H, ArH), 7.79-7.70 (m, 6H, ArH), 7.48-7.32 (m, 8H, ArH), 7.27-7.21 (m, 4H, ArH), 7.18-7.17 (m, 2H, ArH), 7.00-6.99 (m, 2H, ArH), 6.83 (d, *J* = 6.9 Hz, 1H, ArH) ppm; <sup>13</sup>C-NMR (75 MHz, CDCl<sub>3</sub>): δ 141.7, 141.1, 140.2, 139.5, 138.6, 137.8, 137.2, 137.1, 136.6, 135.8, 135.3, 133.7, 133.0, 132.0, 129.7, 129.3, 129.1, 129.0, 128.3, 127.8, 127.7, 127.4, 127.2, 127.2, 127.1, 127.0, 126.6, 126.5, 126.1, 126.0, 124.0, 123.6, 123.2, 120.9, 120.0, 115.2, 114.3 ppm; DEPT-135 NMR (75 MHz, CDCl<sub>3</sub>): δ 133.8, 132.0, 129.1, 129.0, 128.3, 127.8, 127.7, 127.4, 127.2, 127.2, 127.1, 127.0, 126.5, 126.0, 124.0, 123.6, 123.2, 120.9, 120.0, 115.2, 114.3 ppm; HRMS (ESI): *m/z* Calcd for C<sub>42</sub>H<sub>25</sub>NO<sub>2</sub>S<sub>3</sub> [M+H]<sup>+</sup>: 672.1126, Found 672.1140.

#### Preparation of bis-dibenzothiophene **7**

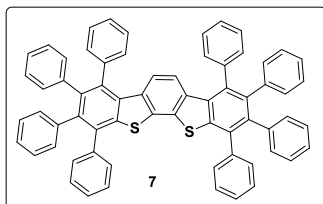

To a solution of cyclopentadienone **1a** (0.28 g, 0.78 mmol) in xylenes (15 mL), benzodithiophene *S,S*-dioxide **5** (0.10 g, 0.39 mmol) was added and refluxed for 24 h. Subsequent removal of solvent followed by column chromatographic purification on silica gel afforded bis-

dibenzothiophene **7** (0.19 g, 61%) as a colorless solid.  $R_f = 0.20$  (eluent: 5% ethyl acetate in hexane); mp > 300 °C;  $^1\text{H-NMR}$  (300 MHz,  $\text{CDCl}_3$ ):  $\delta$  7.54 (s, 1H, ArH), 7.38-7.20 (m, 12H, ArH), 7.16-7.13 (m, 6H, ArH), 6.95-6.78 (m, 22H, ArH), 6.46 (d,  $J = 8.7$  Hz, 1H, ArH) ppm;  $^{13}\text{C-NMR}$  (75 MHz,  $\text{CDCl}_3$ ):  $\delta$  141.8, 141.6, 140.8, 140.6, 140.2, 140.1, 139.9, 139.80, 139.76, 139.73, 139.68, 139.6, 139.3, 139.0, 138.6, 137.2, 135.1, 134.4, 132.2, 131.6, 131.5, 131.4, 131.4, 130.2, 130.0, 129.9, 128.1, 128.0, 127.6, 127.2, 127.0, 127.0, 126.9, 126.7, 126.6, 126.5, 125.9, 125.7, 125.6, 125.4, 125.3, 124.3, 123.8 ppm; DEPT-135 NMR (75 MHz,  $\text{CDCl}_3$ ):  $\delta$  131.6, 131.5, 131.5, 131.4, 130.3, 130.0, 129.9, 128.2, 128.0, 127.6, 127.2, 127.0, 127.0, 126.9, 126.7, 126.6, 126.5, 126.3, 125.9, 125.7, 125.6, 125.4, 125.3, 124.3, 123.8 ppm; HRMS (ESI):  $m/z$  Calcd for  $\text{C}_{66}\text{H}_{42}\text{S}_2$   $[\text{M}+\text{H}]^+$ : 899.2806, Found 899.2802.

### Preparation of pentacene **8**

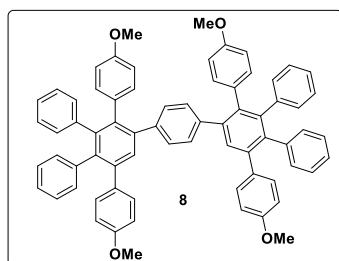

To a solution of cyclopentadienone **1b** (0.35 g, 0.79 mmol) in xylenes (15 mL), benzodithiophene *S,S*-dioxide **5** (0.10 g, 0.39 mmol) was added and refluxed for 24 h. Subsequent removal of solvent followed by column chromatographic purification on silica gel afforded pentacene **8** (0.21g, 56%) as a colorless solid.  $R_f = 0.25$  (eluent: 10% ethyl acetate in hexane); mp >300 °C;  $^1\text{H-NMR}$  (300 MHz,  $\text{CDCl}_3$ ):  $\delta$  7.97 (d,  $J = 8.1$  Hz, 1H, ArH) 7.67 (d,  $J = 5.4$  Hz, 1H, ArH) 7.44 (d,  $J = 5.4$  Hz, 1H, ArH), 7.35-7.28 (m, 4H, ArH), 7.07-7.03 (m, 11H, ArH), 6.96-6.92 (m, 6H, ArH), 6.88-6.85 (m, 4H, ArH) 6.76-6.72 (m, 14H, ArH) 3.75 (s, 6H,  $\text{OCH}_3$ ), 3.71 (s, 6H,  $\text{OCH}_3$ ) ppm;  $^{13}\text{C-NMR}$  (75 MHz,  $\text{CDCl}_3$ ):  $\delta$  162.8, 160.8, 159.1, 156.5, 155.3, 137.0, 135.9, 132.3, 131.8, 131.2, 130.7, 130.5, 129.8, 128.4, 127.7, 127.4, 127.3, 127.0, 125.6, 124.4, 123.8, 121.2, 119.0, 113.7, 113.6, 55.5 ( $\text{OCH}_3$ ), 55.4 ( $\text{OCH}_3$ ) ppm; HRMS (ESI):  $m/z$  Calcd for  $\text{C}_{70}\text{H}_{54}\text{O}_4$   $[\text{M}+\text{H}]$ : 958.4022, Found 958.4012.

### Preparation of bis-acenaphthodibenzothiophene **9**

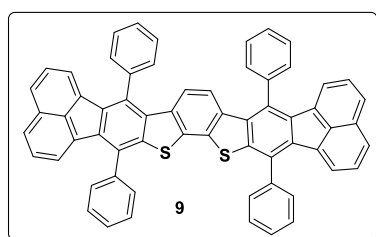

To a solution of cyclopentadienone **1e** (0.35 g, 0.79 mmol) in xylenes (15 mL), benzodithiophene *S,S*-dioxide **5** (0.10 g, 0.39 mmol) was added and refluxed for 24 h. Subsequent removal of solvent followed by column chromatographic purification on silica gel afforded bis-dibenzothiophene **9** (0.18 g, 55%) as a green solid.  $R_f = 0.20$  (eluent: 5% ethyl acetate in hexane); mp > 300 °C;  $^1\text{H-NMR}$  (300 MHz,  $\text{CDCl}_3$ ):  $\delta$  7.77-7.70 (m, 6H, ArH), 7.59-7.50 (m, 5H, ArH), 7.43-7.38 (m, 9H, ArH), 7.35-7.26 (m, 6H, ArH), 7.24-7.18 (m, 3H, ArH), 7.16-7.14 (m, 4H, ArH), 6.68 (d,  $J = 7.2$  Hz, 1H, ArH) ppm;  $^{13}\text{C-NMR}$  (75 MHz,  $\text{CDCl}_3$ ):  $\delta$  141.0, 140.8, 139.3, 138.2, 137.9, 136.6, 136.1, 135.9, 135.7, 133.1, 131.1, 130.3, 129.9, 129.7, 129.1, 128.6, 128.5, 127.8, 127.6, 127.5, 127.3, 126.6, 126.3, 123.3, 122.9 ppm; DEPT-135 NMR (75 MHz,  $\text{CDCl}_3$ ):  $\delta$  131.1, 130.3, 129.9, 129.1, 128.6, 128.3, 127.7, 127.6, 127.5, 127.2, 126.5, 126.3, 123.3, 122.9 ppm; HRMS (ESI):  $m/z$  Calcd for  $\text{C}_{62}\text{H}_{34}\text{S}_2$   $[\text{M}+\text{H}]^+$ : 843.2180, Found 843.2195.

**1,4-Bis(7,10-bis(4-methoxyphenyl)fluoranthen-8-yl)benzene 10a**

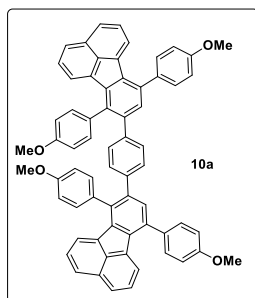

To a solution of cyclopentadienone **1g** (0.31 g, 0.79 mmol) in xylenes (15 mL), benzodithiophene *S,S*-dioxide **5** (0.10 g, 0.39 mmol) was added and refluxed for 24 h. Subsequent removal of solvent followed by column chromatographic purification on silica gel afforded bis-fluoranthene **10a** (0.25 g, 71%) as a green solid.  $R_f = 0.25$  (eluent: 20% ethyl acetate in hexane); mp 294-296 °C;  $^1\text{H-NMR}$  (300 MHz,  $\text{CDCl}_3$ ):  $\delta$  7.75-7.70 (m, 4H, ArH), 7.67-7.64 (m, 4H, ArH), 7.56-7.50 (m, 6H, ArH), 7.42-7.34 (m, 7H, ArH), 7.32-7.29 (m, 3H, ArH), 7.24-7.21 (m, 4H, ArH), 7.04 (d,  $J = 6.9$  Hz, 2H, ArH), 6.97 (d,  $J = 8.7$  Hz, 2H, ArH), 6.63 (d,  $J = 7.2$  Hz, 2H, ArH), 4.06 (s, 6H,  $\text{OCH}_3$ ), 4.01 (s, 6H,  $\text{OCH}_3$ ) ppm;  $^{13}\text{C-NMR}$  (75 MHz,  $\text{CDCl}_3$ ):  $\delta$  160.2, 160.0, 141.0, 138.0, 137.0, 136.9, 136.2, 135.3, 134.6, 134.1, 134.0, 133.9, 133.8, 133.6, 132.1, 131.9, 131.3, 130.7, 130.1, 128.0, 127.8, 126.5, 126.2, 125.6, 124.7, 122.9, 122.7, 121.5, 120.0, 115.5, 115.0, 55.6 ( $\text{OCH}_3$ ), 55.5 ( $\text{OCH}_3$ ) ppm; DEPT-135 NMR (75 MHz,  $\text{CDCl}_3$ ):  $\delta$  130.5, 130.4, 127.8, 127.6, 126.0, 125.3, 124.5, 122.7, 122.5, 121.2, 119.8, 115.3, 114.8, 55.4, 55.3 ppm; HRMS (ESI):  $m/z$  Calcd for  $\text{C}_{66}\text{H}_{46}\text{O}_4$   $[\text{M}+\text{H}]^+$ : 903.3474, Found 903.3488.

**1,4-Bis(7,10-bis(3,4-dimethoxyphenyl)fluoranthen-8-yl)benzene 10b**

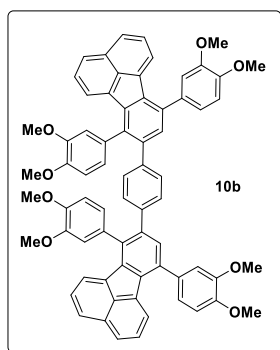

To a solution of cyclopentadienone **1h** (0.39 g, 0.79 mmol) in xylenes (15 mL), benzodithiophene *S,S*-dioxide **5** (0.10 g, 0.39 mmol) was added and refluxed for 24 h. Subsequent removal of solvent followed by column chromatographic purification on silica gel afforded bis-fluoranthene **10b** (0.24 g, 61%) as a green solid.  $R_f = 0.20$  (eluent: 30% ethyl acetate in hexane); mp 218-220 °C;  $^1\text{H-NMR}$  (300 MHz,  $\text{CDCl}_3$ ):  $\delta$  7.79 (s, 2H, ArH), 7.55-7.71 (m, 3H, ArH), 7.59 (d,  $J = 8.4$  Hz, 2H, ArH), 7.40-7.301 (m, 9H, ArH), 7.25-7.19 (m, 6H, ArH), 7.05 (d,  $J = 7.8$  Hz, 2H, ArH), 6.96-6.88 (m, 6H, ArH), 4.00 (s, 3H,  $\text{OCH}_3$ ), 3.99 (s, 3H,  $\text{OCH}_3$ ), 3.91 (s, 3H,  $\text{OCH}_3$ ), 3.90 (s, 3H,  $\text{OCH}_3$ ), 3.89 (s, 3H,  $\text{OCH}_3$ ), 3.89 (s, 3H,  $\text{OCH}_3$ ), 3.66 (s, 3H,  $\text{OCH}_3$ ), 3.65 (s, 3H,  $\text{OCH}_3$ ) ppm;  $^{13}\text{C-NMR}$  (75 MHz,  $\text{CDCl}_3$ ):  $\delta$  149.6, 148.6, 141.0, 139.7, 138.7, 138.1, 137.9, 137.8, 136.9, 136.23, 136.18, 133.7, 133.4, 132.0, 131.6, 130.0, 127.8, 127.7, 126.8, 126.7, 126.4, 123.7, 123.6, 123.2, 123.0, 122.6, 121.5, 114.3, 113.0, 112.0, 111.7, 56.3 ( $\text{OCH}_3$ ), 56.2 ( $\text{OCH}_3$ ), 56.13 ( $\text{OCH}_3$ ), 56.07 ( $\text{OCH}_3$ ) ppm; DEPT-135 NMR (75 MHz,  $\text{CDCl}_3$ ):  $\delta$  131.4, 127.6, 127.5, 126.6, 126.5, 126.2, 123.5, 123.4, 123.4, 122.9, 122.7, 122.4, 121.3, 114.1, 112.8, 112.0, 111.7, 56.1, 56.0, 55.95, 55.90 ppm; HRMS (ESI):  $m/z$  Calcd for  $\text{C}_{70}\text{H}_{54}\text{O}_8$   $[\text{M}+\text{H}]^+$ : 1023.3897, Found 1023.3891.

**10-Hexyl-7,13,20,23-tetraphenyl-10*H*-fluorantheno[8',9':4,5]thieno[2,3-*b*]fluorantheno[8',9':4,5]thieno[3,2-*h*]carbazole **12****

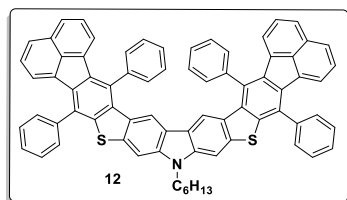

To a solution of cyclopentadienone **1e** (0.17 g, 0.47 mmol) in xylenes (15 mL), benzodithiophene *S,S*-dioxide **10** (0.10 g, 0.23 mmol) was added and refluxed for 24 h. Subsequent removal of solvent followed by column chromatographic purification on silica gel afforded bis-fluoranthene **12** (0.14 g, 58%) as a green solid.  $R_f = 0.30$  (eluent: 15% ethyl acetate in hexane); mp > 300 °C;  $^1\text{H-NMR}$  (300 MHz,  $\text{CDCl}_3$ ):  $\delta$  7.99-7.94 (m, 2H, ArH), 7.89-7.84 (m, 4H, ArH), 7.73-7.62 (m, 18H, ArH), 7.61-7.59 (m, 4H, ArH), 7.35-7.28 (m, 4H, ArH), 6.91 (d,  $J = 6.9$  Hz, 2H, ArH), 6.25

(d,  $J = 7.2$  Hz, 2H, ArH), 4.22 (t,  $J = 6.6$  Hz, 2H, N-CH<sub>2</sub>), 1.83 (t,  $J = 6.9$  Hz, 2H, CH<sub>2</sub>), 1.36-1.26 (m, 6H, CH<sub>2</sub>) 0.83 (t,  $J = 6.8$  Hz, 3H, CH<sub>3</sub>) ppm; <sup>13</sup>C-NMR (75 MHz, CDCl<sub>3</sub>):  $\delta$  141.0, 140.0, 139.8, 139.2, 137.1, 136.5, 136.1, 134.4, 134.0, 133.6, 132.9, 132.0, 130.2, 130.0, 129.5, 129.38, 129.36, 128.9, 128.6, 127.9, 127.6, 126.3, 126.0, 122.7, 122.4, 121.9, 116.9, 101.2, 43.2 (N-CH<sub>2</sub>), 31.6 (CH<sub>2</sub>), 28.3 (CH<sub>2</sub>), 26.9 (CH<sub>2</sub>), 22.5 (CH<sub>2</sub>), 13.9 (CH<sub>3</sub>) ppm; DEPT-135 NMR (75 MHz, CDCl<sub>3</sub>):  $\delta$  130.1, 129.4, 129.31, 129.25, 128.9, 128.6, 128.2, 127.8, 127.5, 126.3, 125.9, 122.6, 122.3, 116.8, 101.1, 43.1, 31.5, 28.2, 26.9, 22.4, 13.9 ppm; HRMS (ESI):  $m/z$  Calcd for C<sub>74</sub>H<sub>49</sub>NS<sub>2</sub> [M+H]<sup>+</sup>: 1016.3385, Found 1016.3398.



### 3. References

1. Karunakaran, J.; Mohanakrishnan, A. K. *Org. Lett.* **2018**, *20*, 966.
2. Iniesta, J.; Matsumoto, T.; Thiemann, T. *J. Chem. Res.* **2008**, *2*, 109.
3. Karunakaran, J.; Manikandan, P.; Sathish, M.; Mohanakrishnan, A. K. *ChemistrySelect* **2018**, *3*, 9409.
4. Yang, K.; Pulis, A. P.; Perry, G. J. P.; Procter, D. J. *Org. Lett.* **2018**, *20*, 7498.
5. Bordwell, F. G.; Albisetti, Jr. C. J. *J. Am. Chem. Soc.* **1948**, *17*, 1558

#### **4. $^1\text{H}$ , $^{13}\text{C}$ and DEPT-135 NMR SPECTRA**

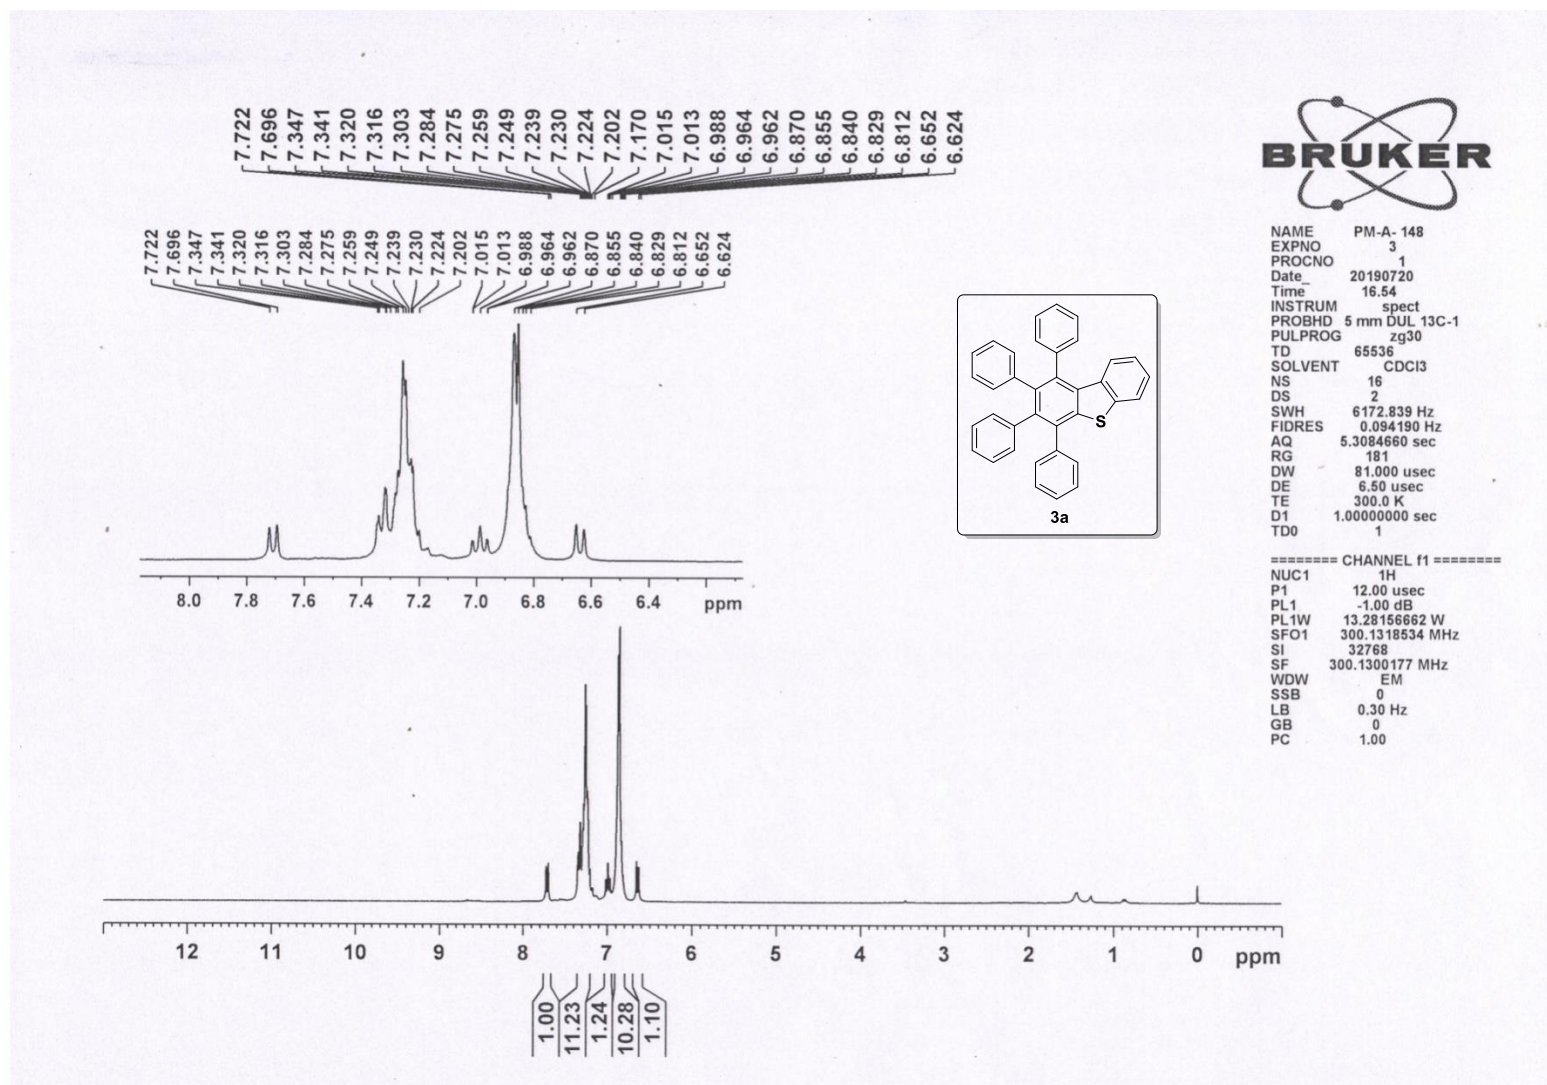

<sup>1</sup>H-NMR (300 MHz, CDCl<sub>3</sub>) spectrum of compound **3a**

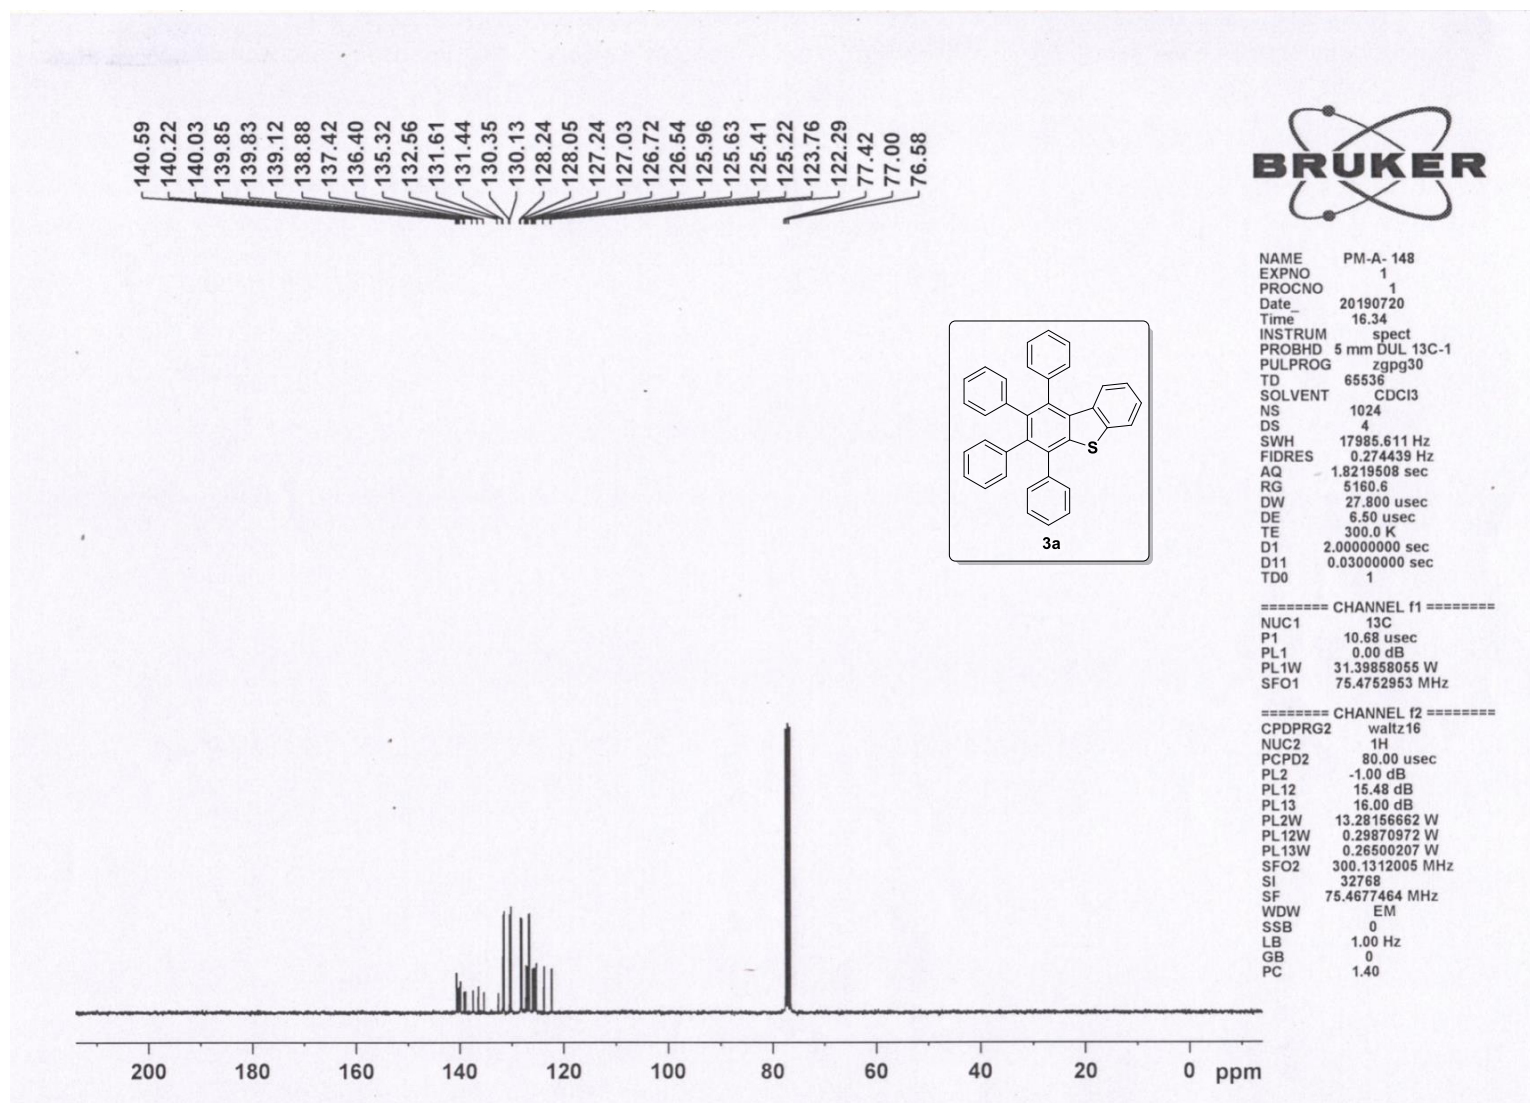

$^{13}\text{C}$ -NMR (75 MHz,  $\text{CDCl}_3$ ) spectrum of compound **3a**

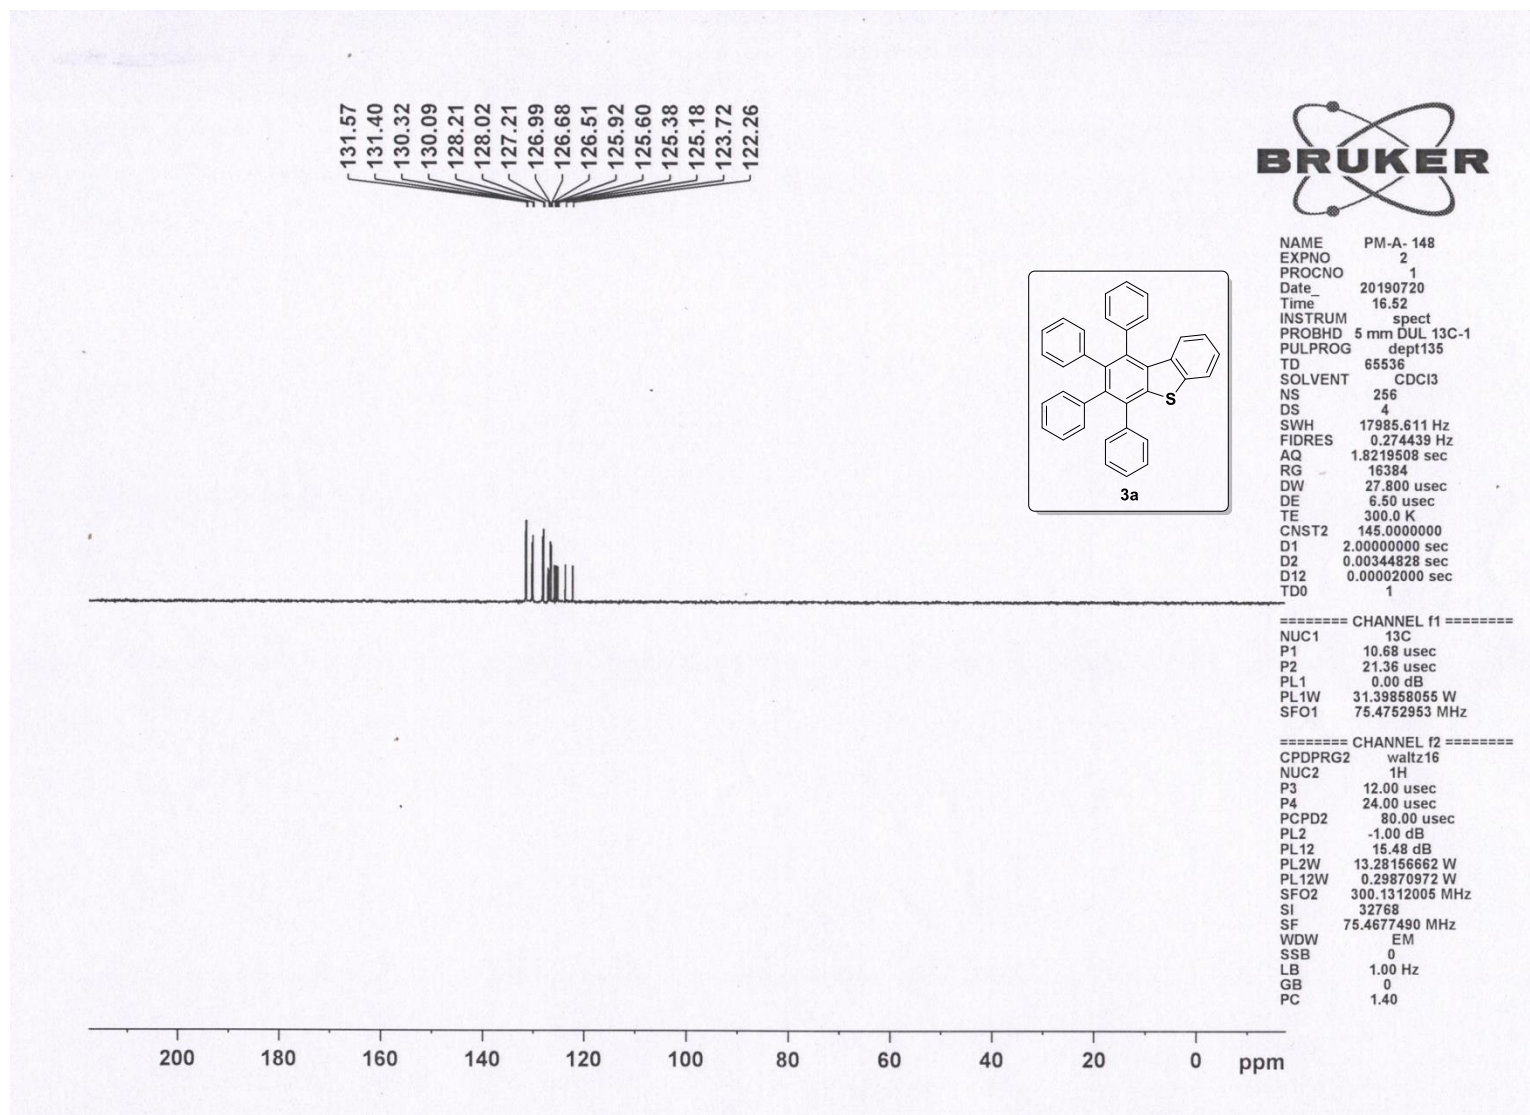

DEPT-135 (75 MHz, CDCl<sub>3</sub>) NMR spectrum of compound **3a**



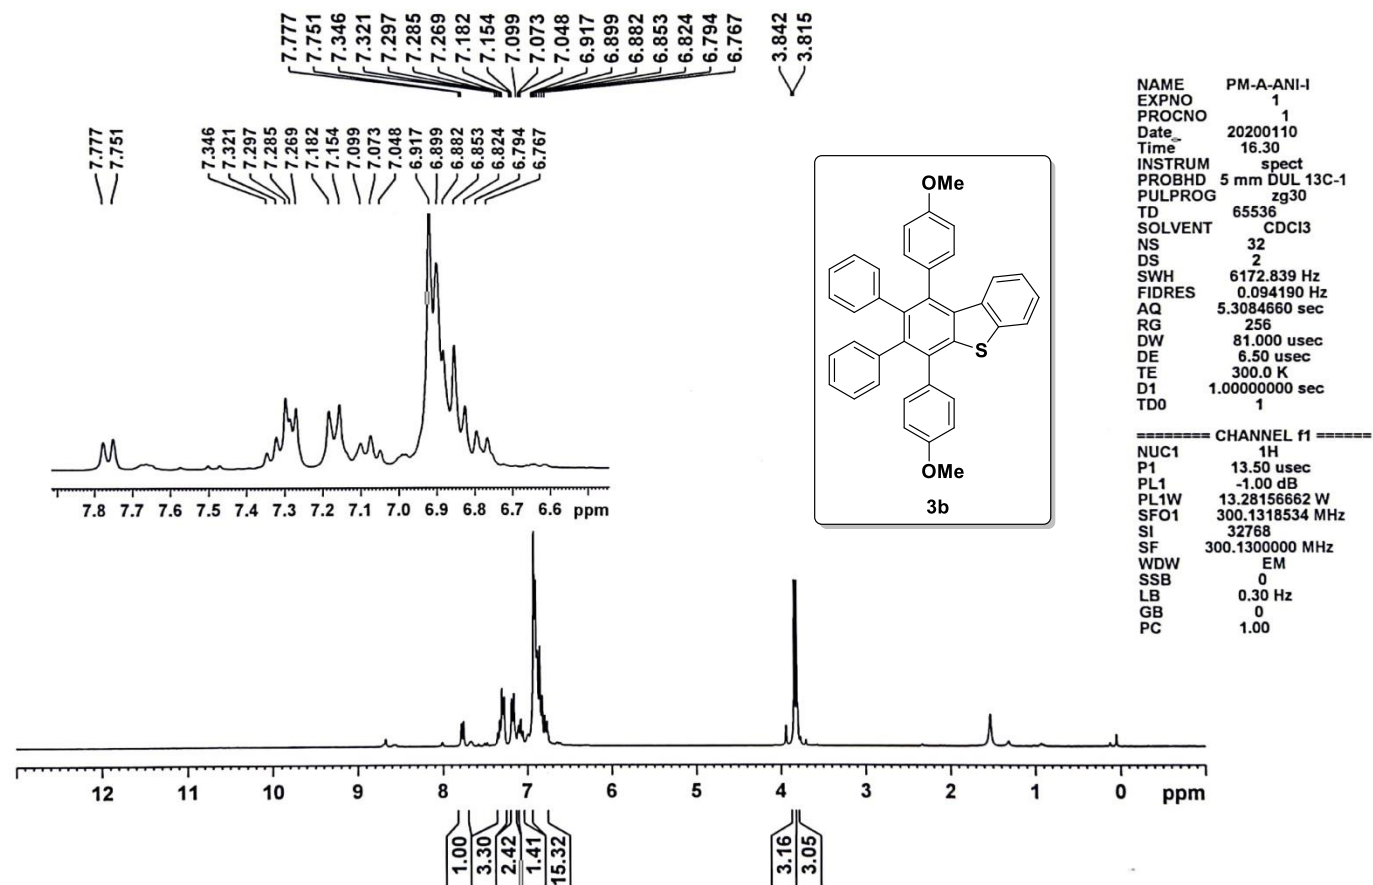

<sup>1</sup>H-NMR (300 MHz, CDCl<sub>3</sub>) spectrum of compound **3b**

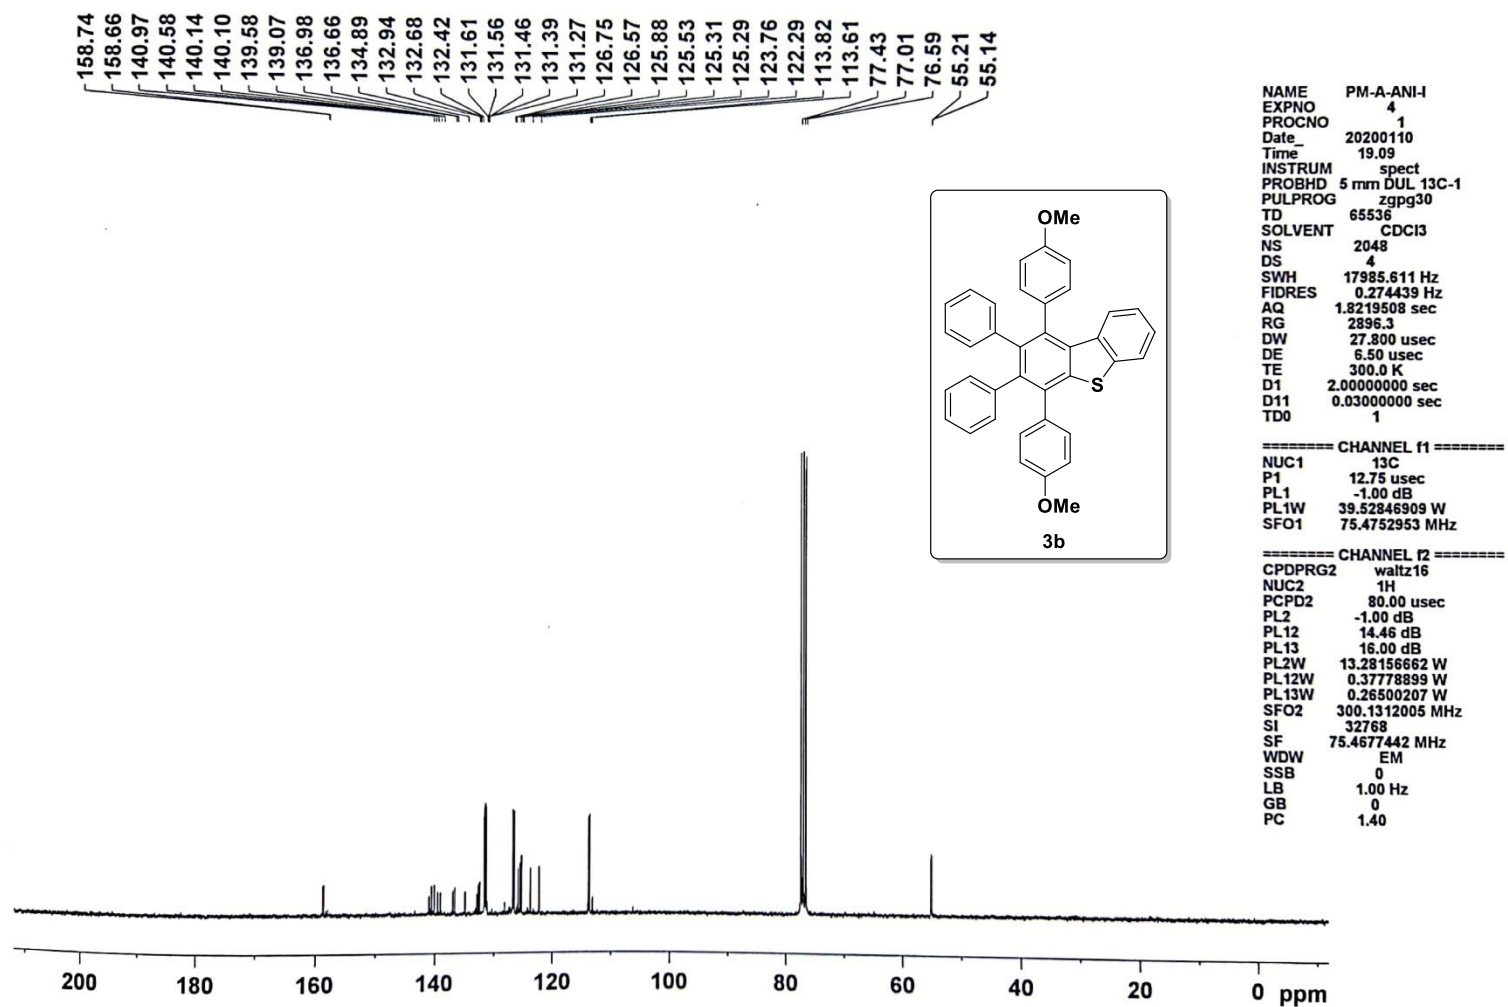

$^{13}\text{C}$ -NMR (75 MHz,  $\text{CDCl}_3$ ) spectrum of compound **3b**

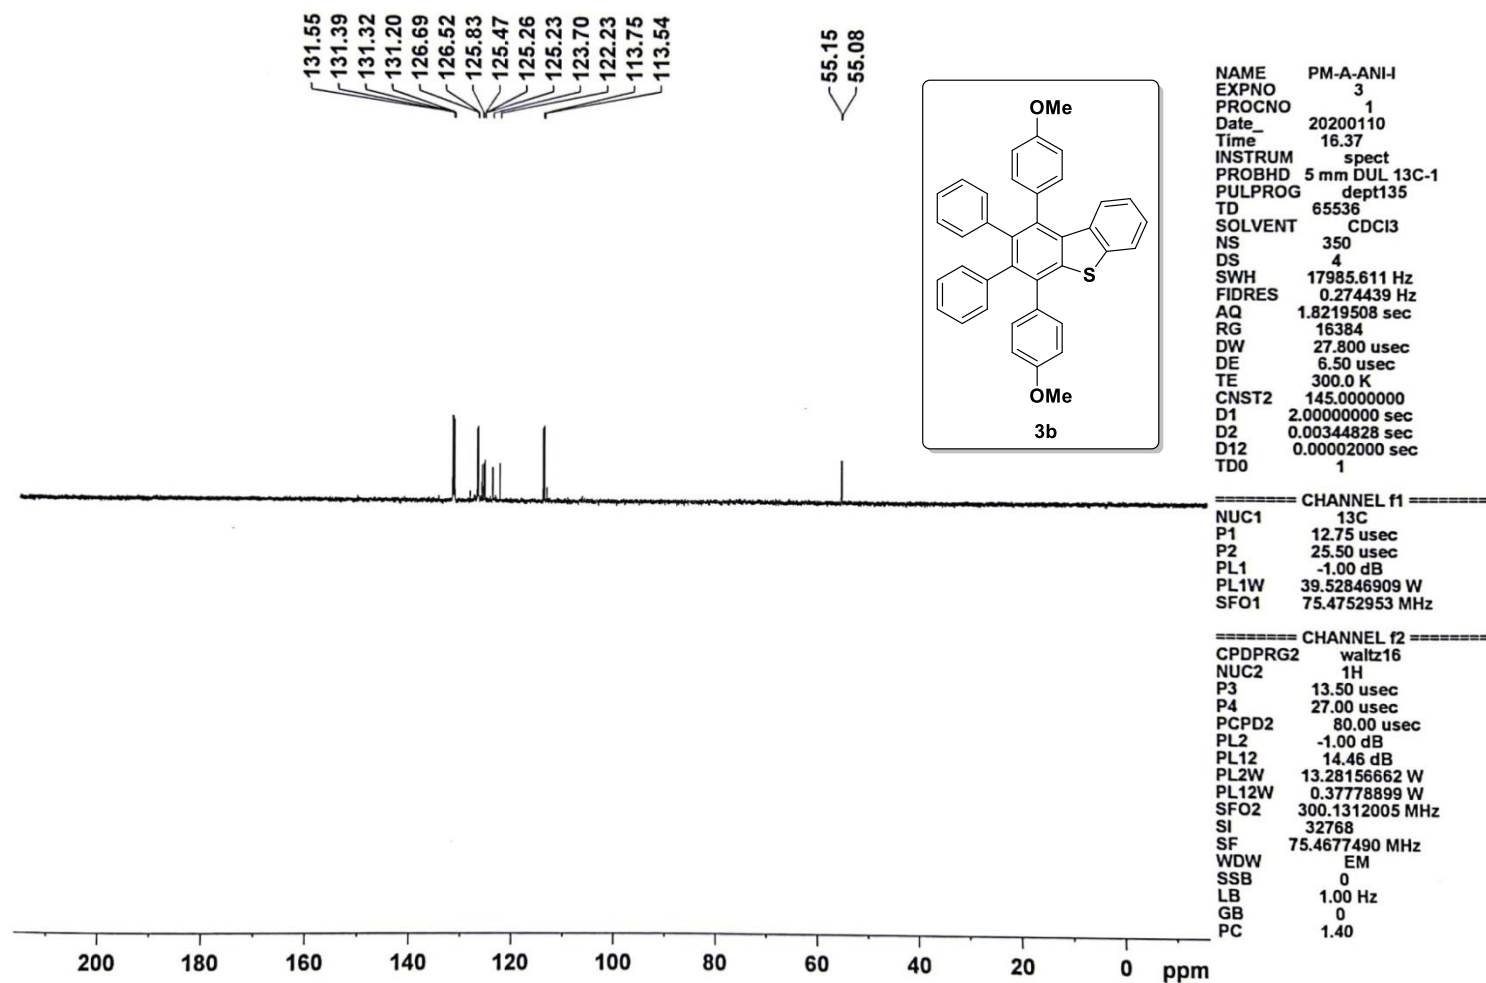

DEPT-135 (75 MHz, CDCl<sub>3</sub>) NMR spectrum of compound **3b**



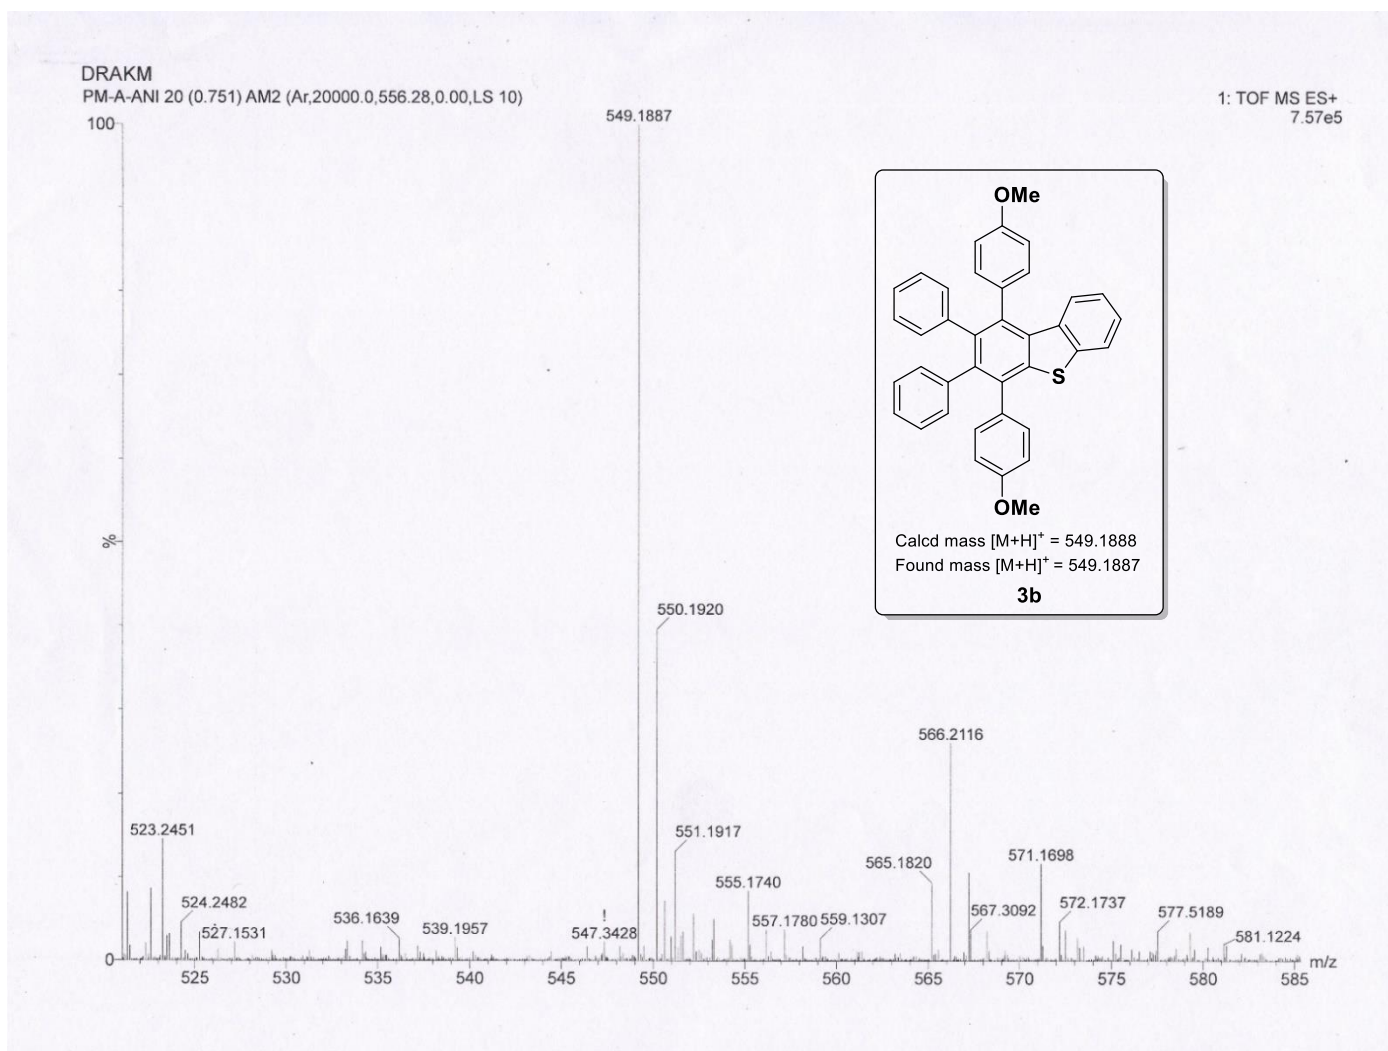

HRMS spectrum of compound **3b**

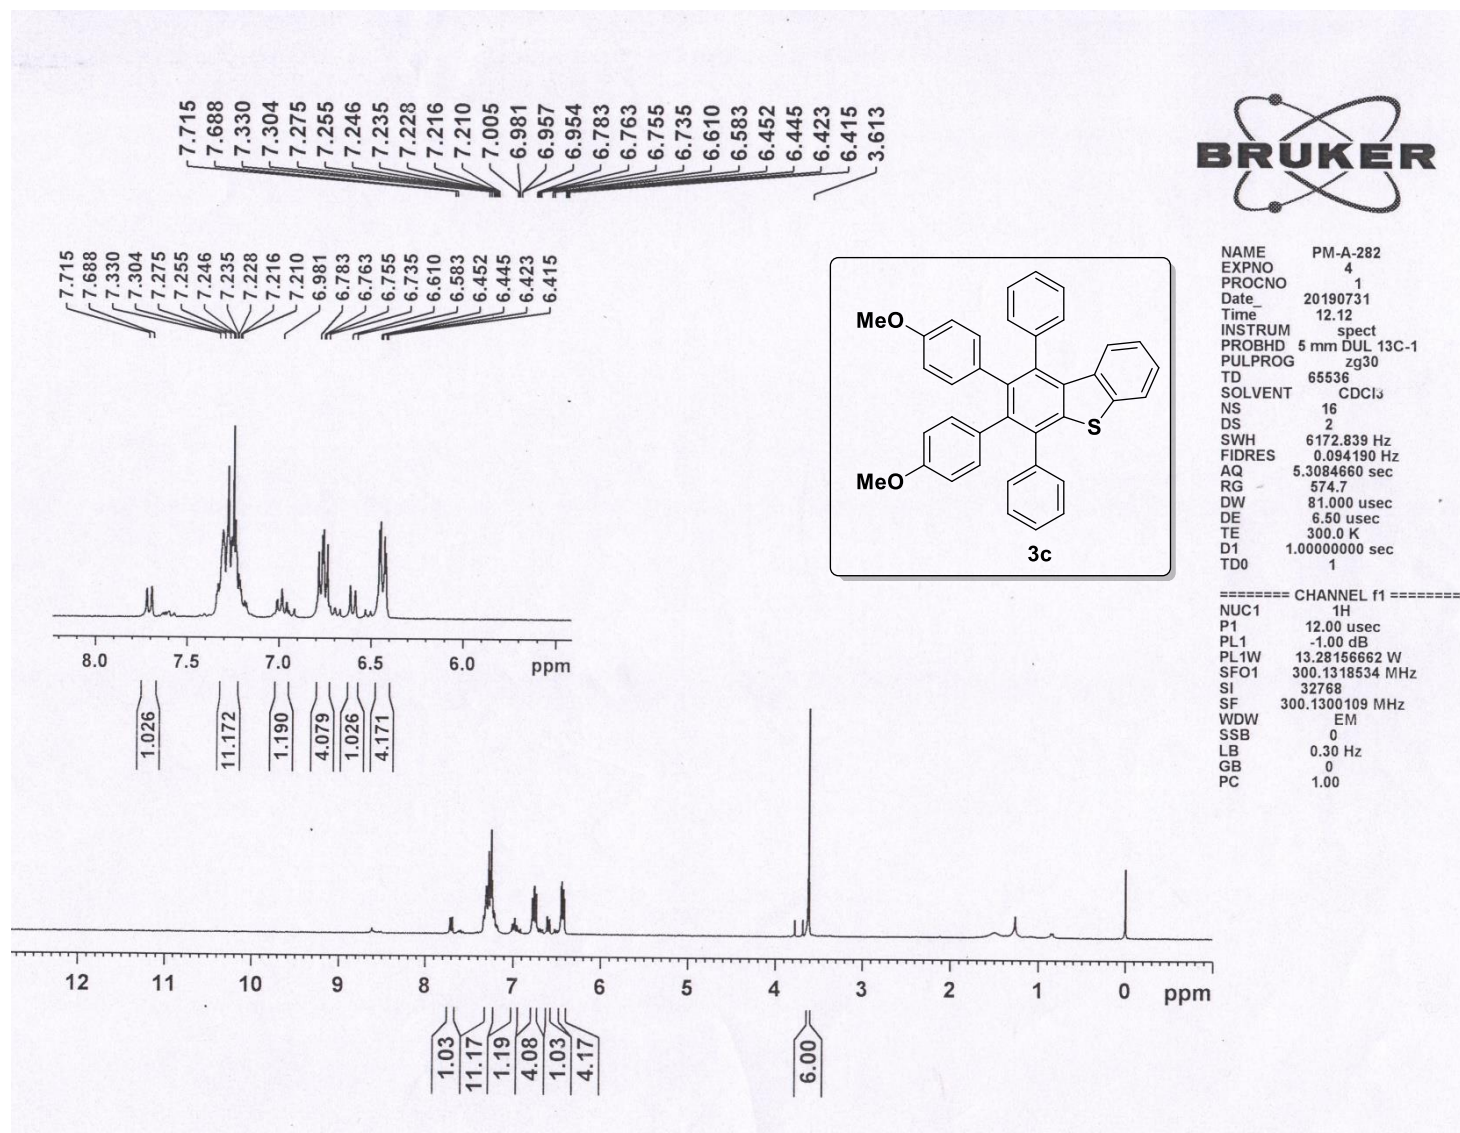

<sup>1</sup>H-NMR (300 MHz, CDCl<sub>3</sub>) spectrum of compound **3c**

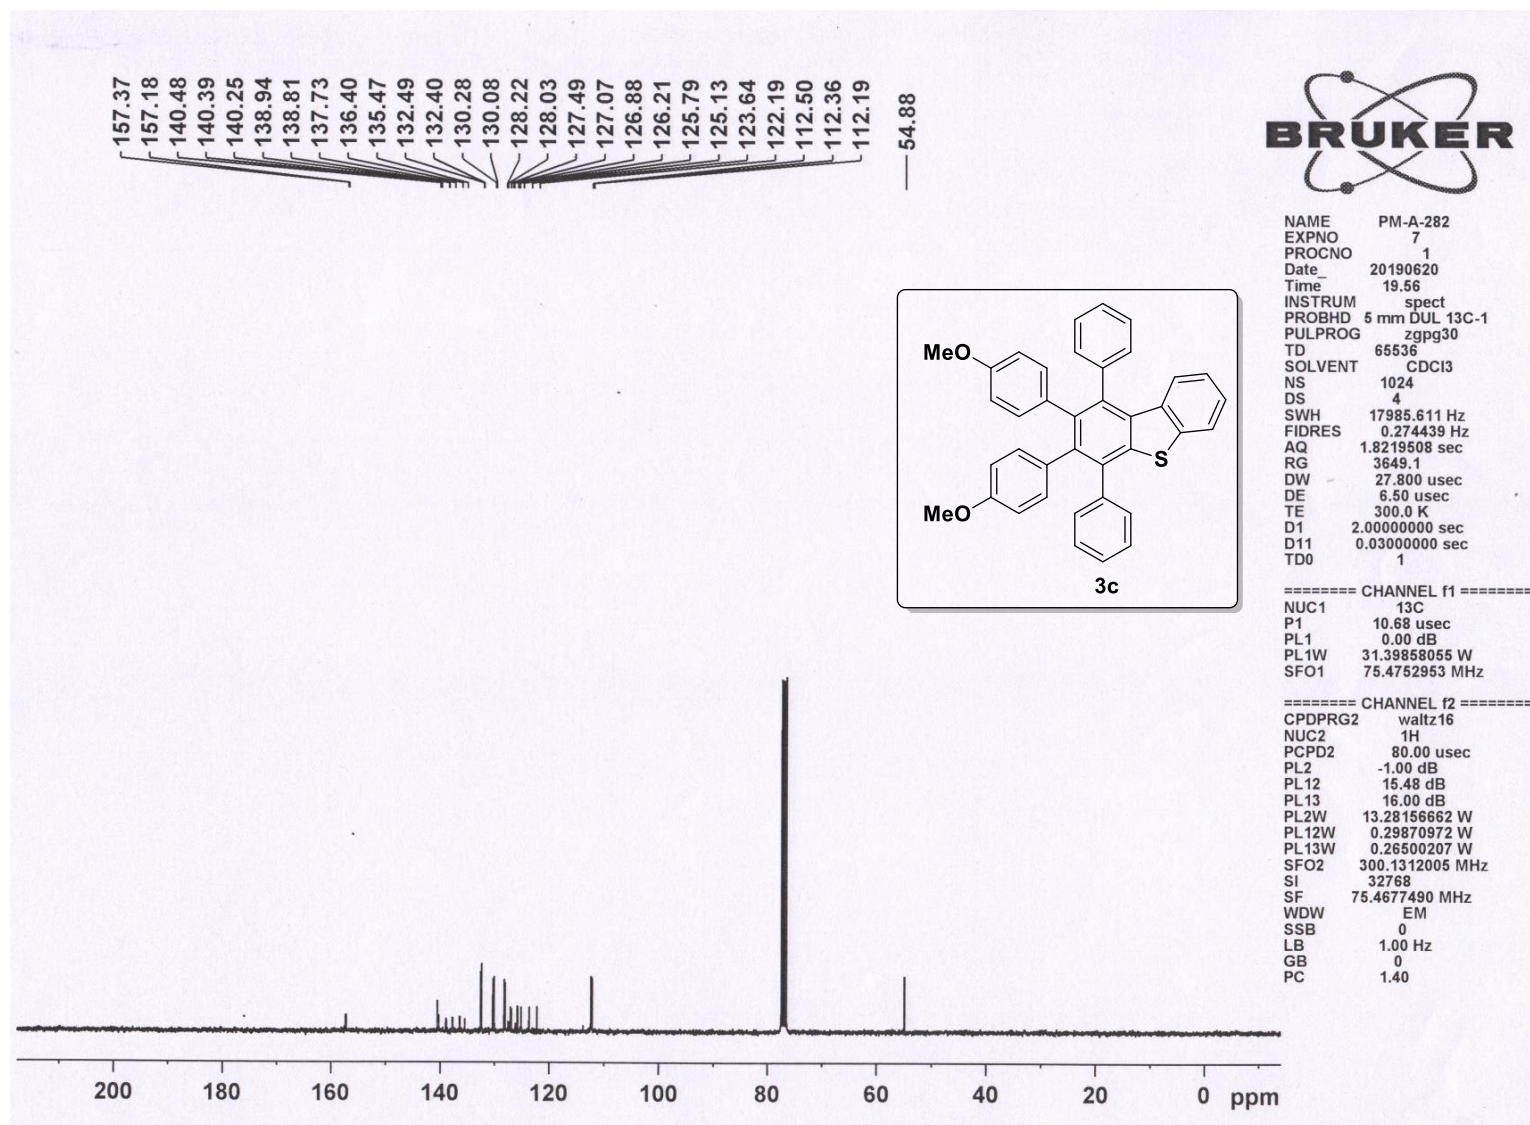

<sup>13</sup>C-NMR (75 MHz, CDCl<sub>3</sub>) spectrum of compound **3c**



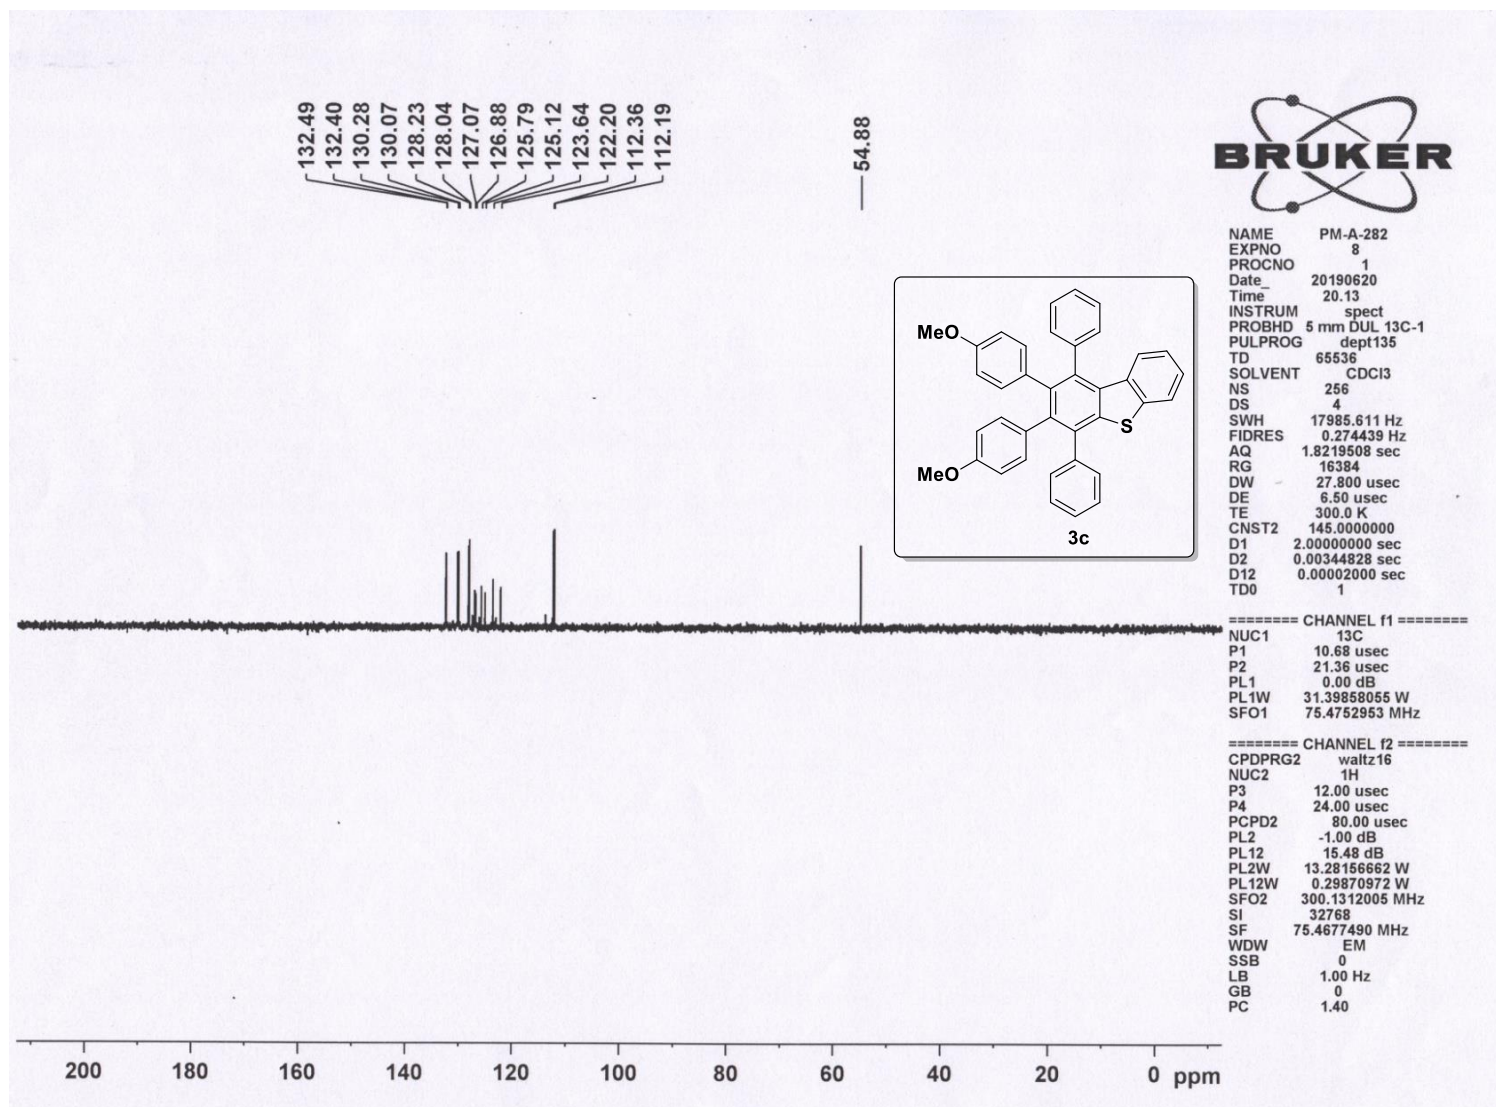

DEPT-135 (75 MHz, CDCl<sub>3</sub>) NMR spectrum of compound **3c**

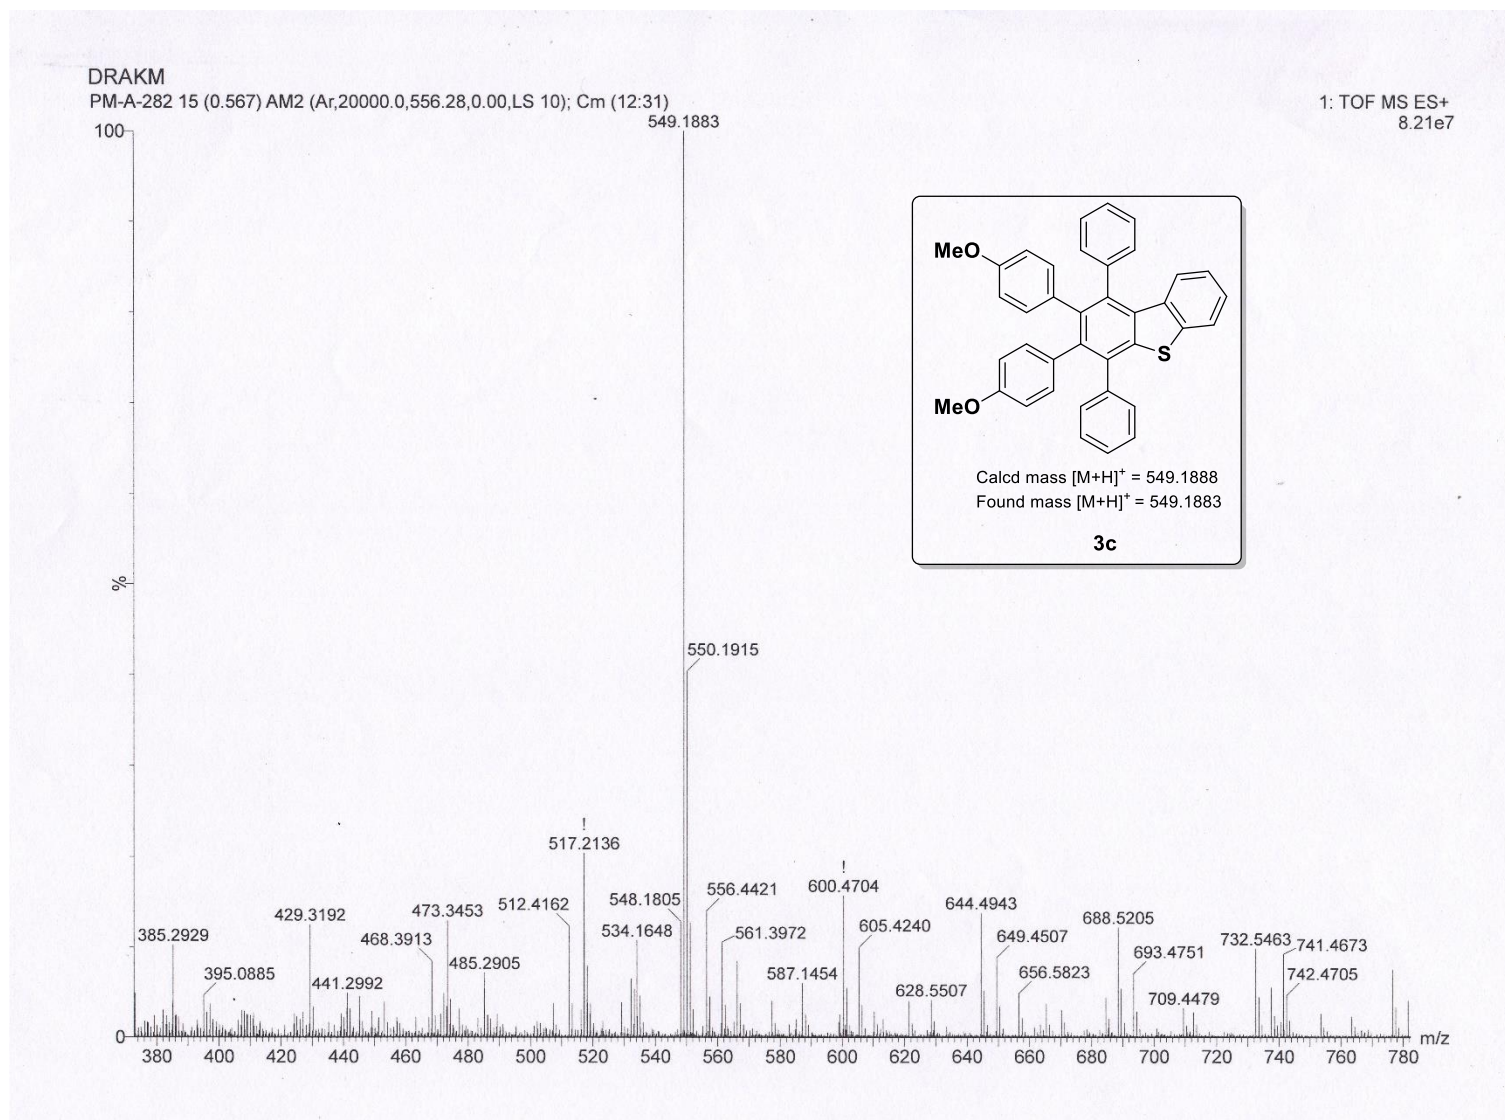

HRMS spectrum of compound **3c**

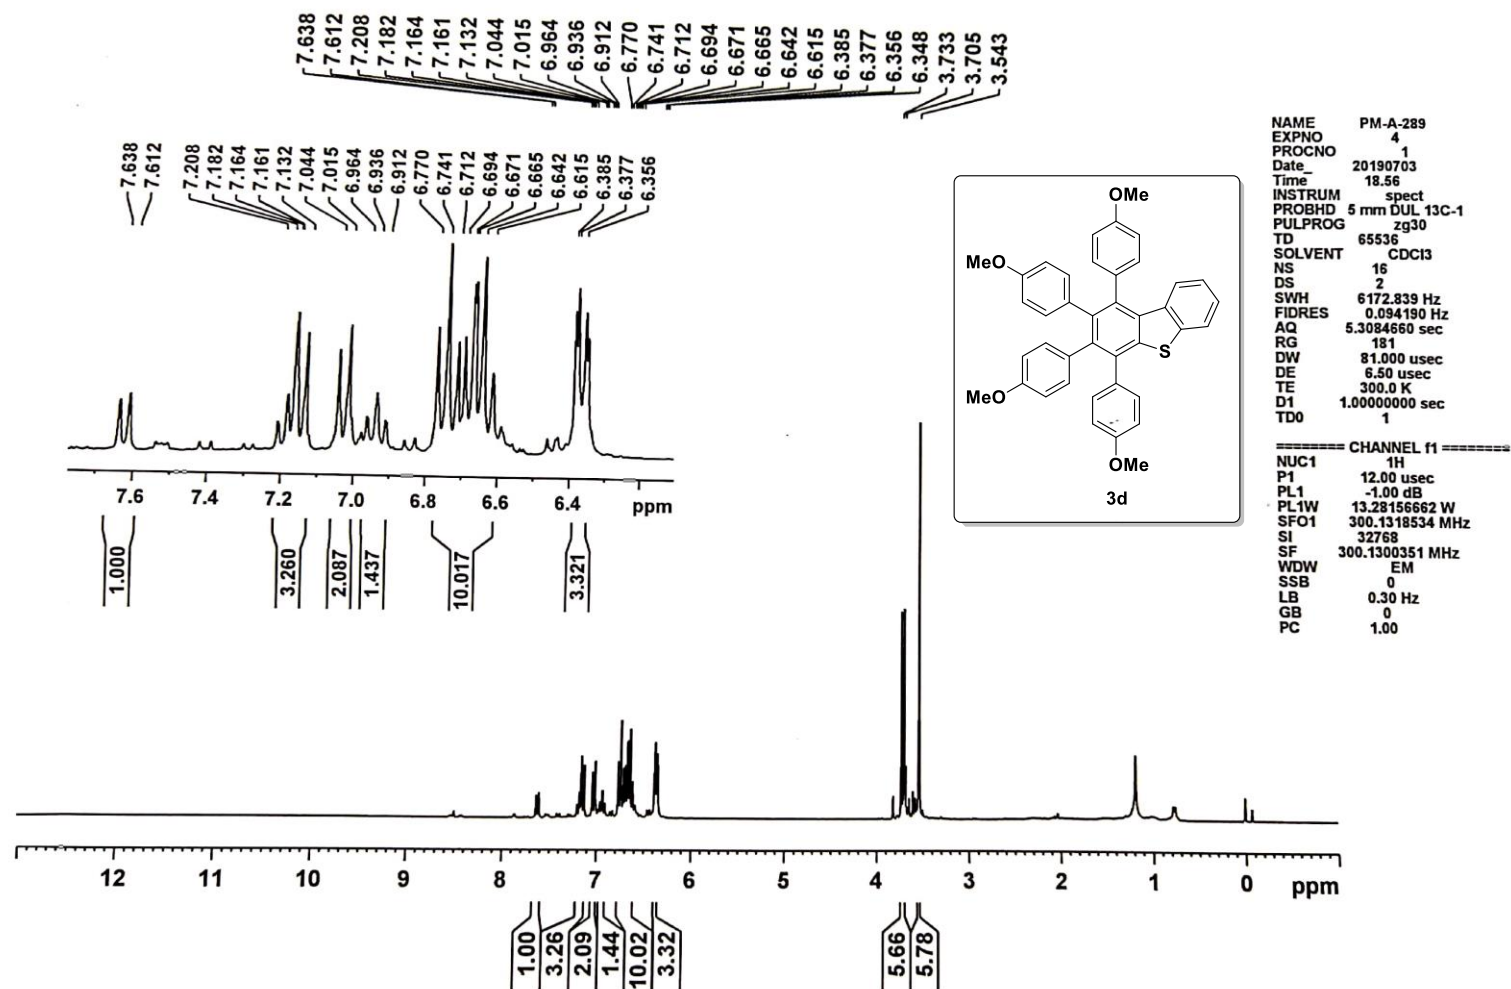

<sup>1</sup>H-NMR (300 MHz, CDCl<sub>3</sub>) spectrum of compound **3d**



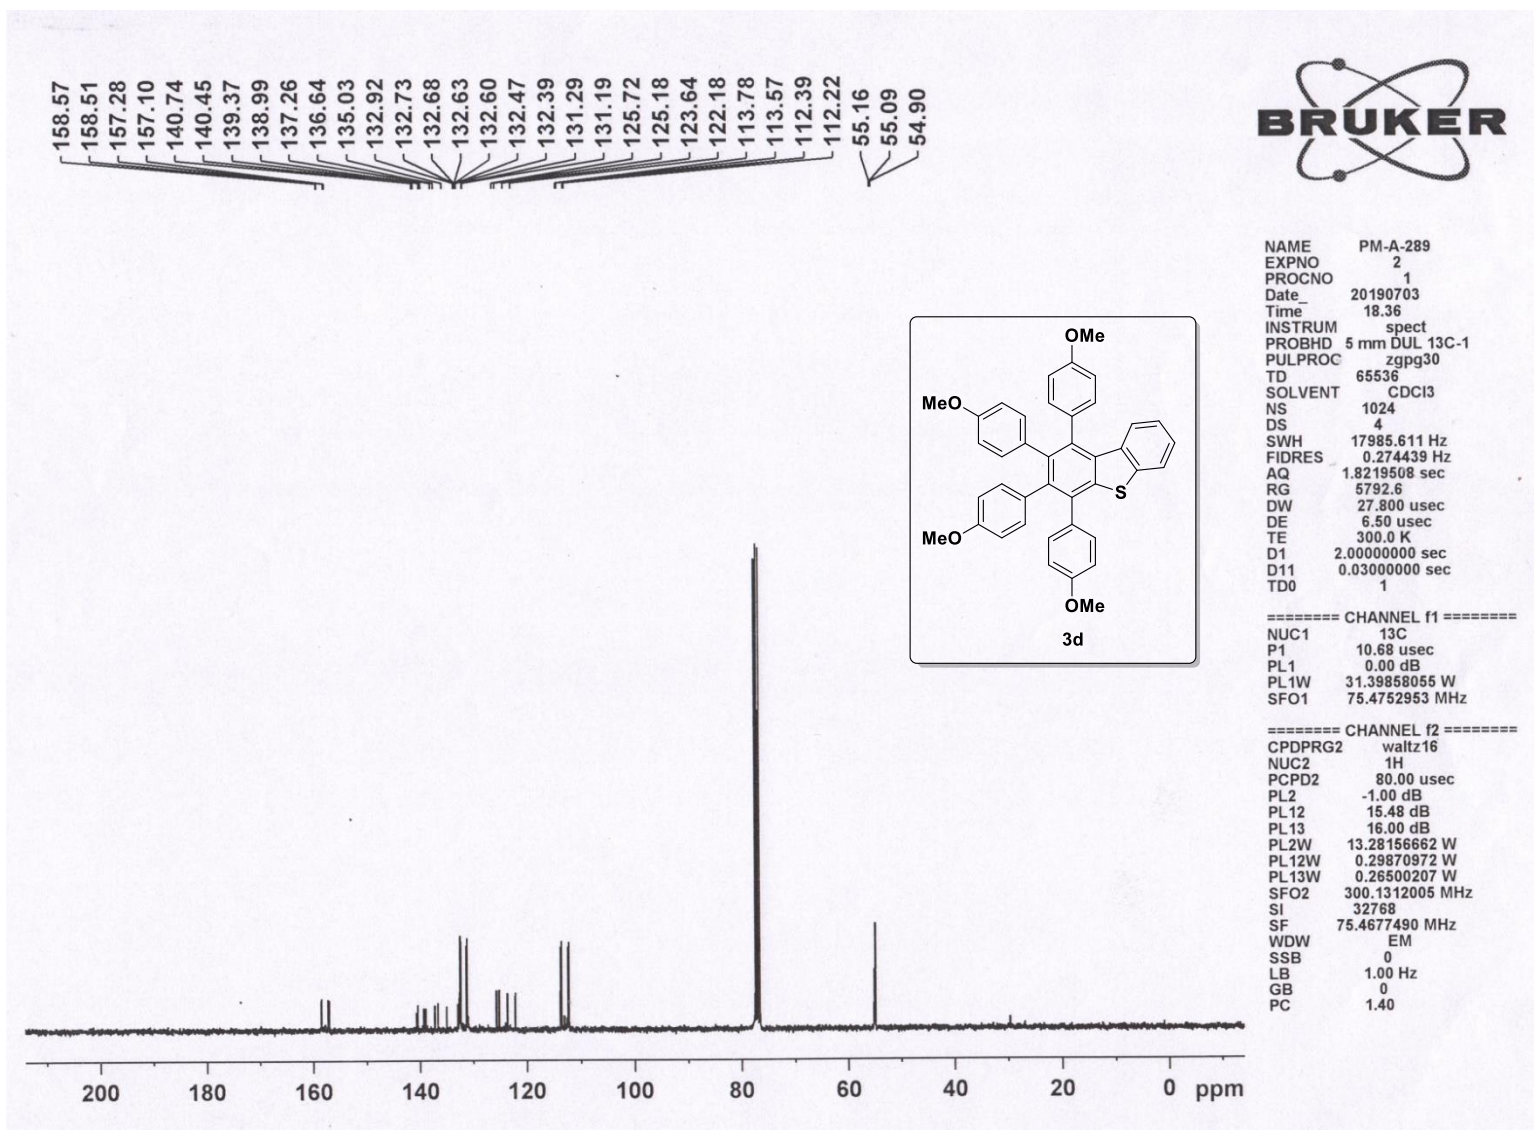

$^{13}\text{C}$ -NMR (75 MHz,  $\text{CDCl}_3$ ) spectrum of compound **3d**

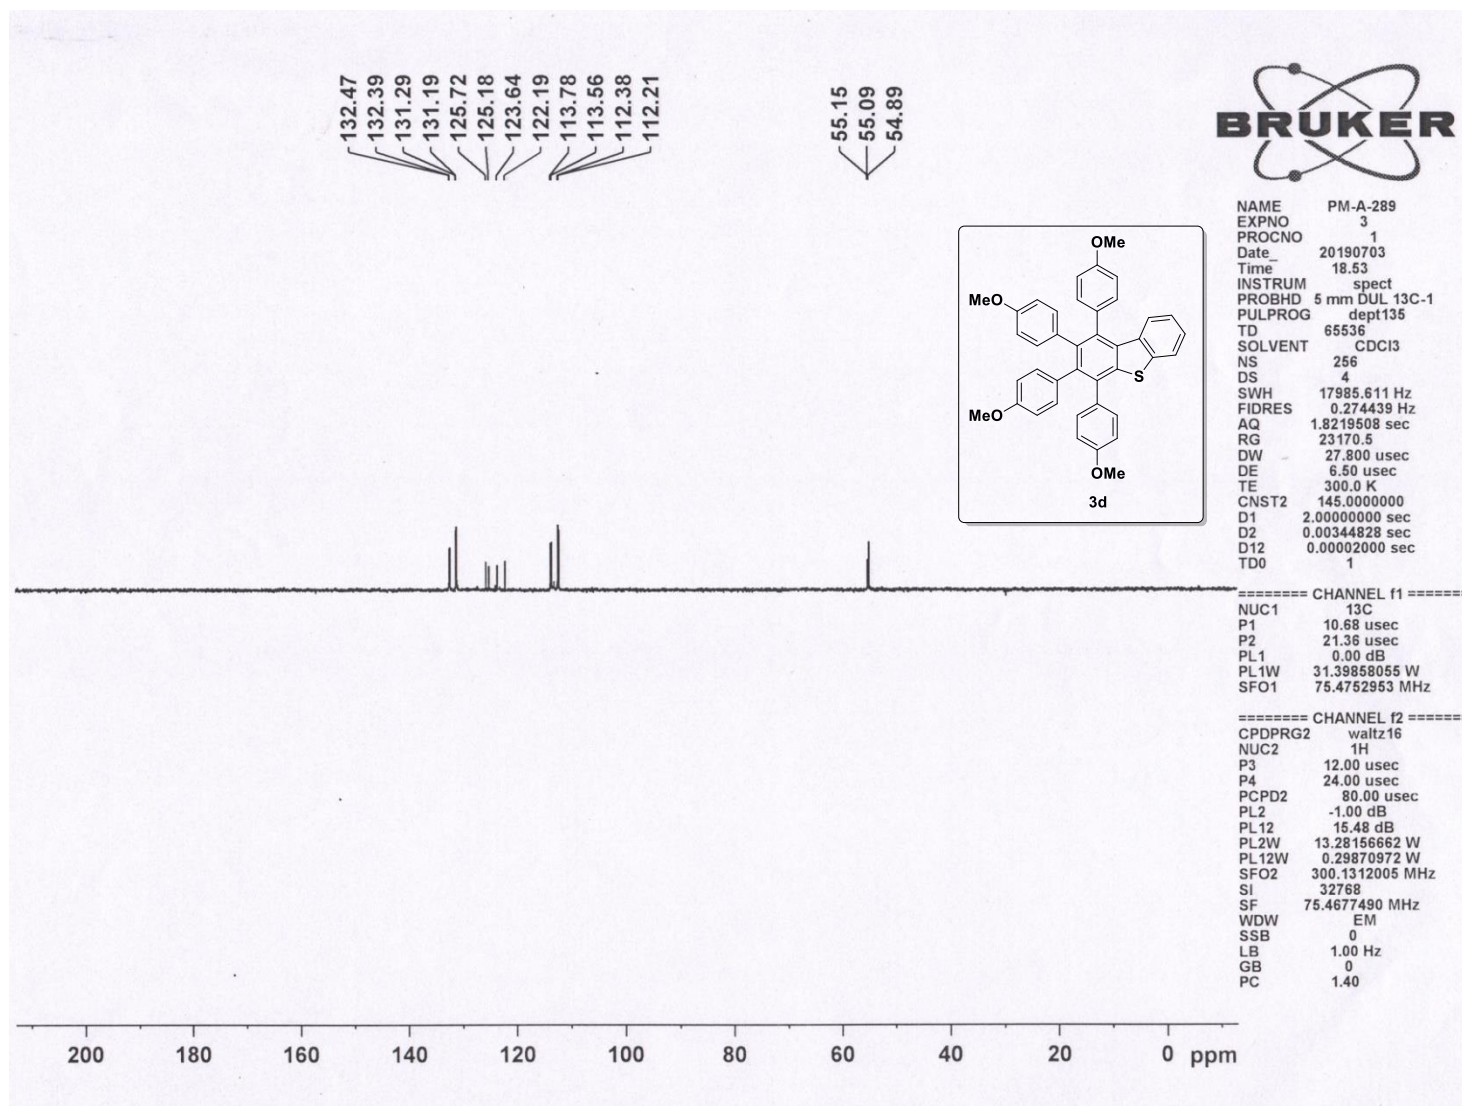

DEPT-135 (75 MHz, CDCl<sub>3</sub>) NMR spectrum of compound **3d**



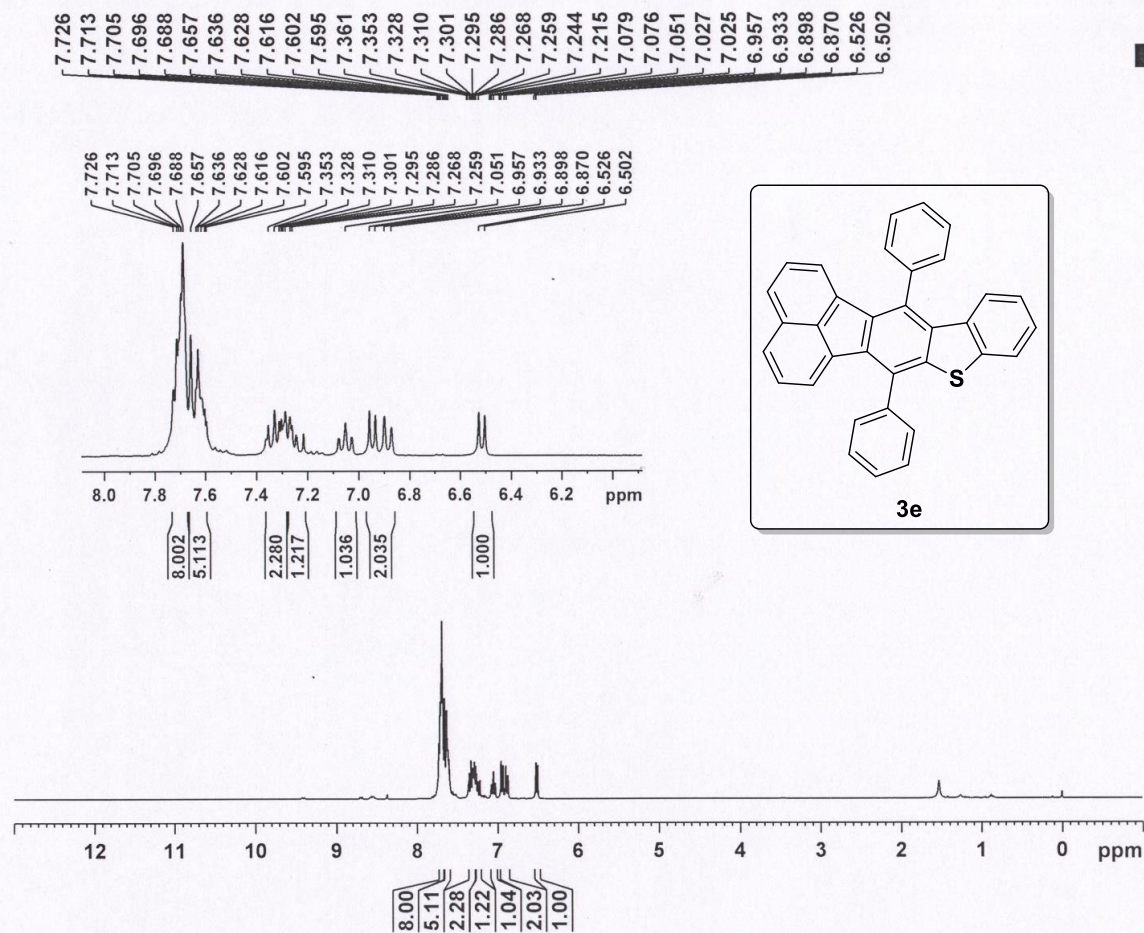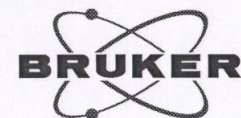

NAME PM-A-202  
 EXPNO 8  
 PROCNO 1  
 Date\_ 20180818  
 Time 17.15  
 INSTRUM spect  
 PROBHD 5 mm DUL 13C-1  
 PULPROG zg30  
 TD 65536  
 SOLVENT CDCl3  
 NS 16  
 DS 2  
 SWH 6172.839 Hz  
 FIDRES 0.094190 Hz  
 AQ 5.3084660 sec  
 RG 128  
 DW 81.000 usec  
 DE 6.50 usec  
 TE 300.0 K  
 D1 1.00000000 sec  
 TD0 1

===== CHANNEL f1 =====  
 NUC1 1H  
 P1 12.00 usec  
 PL1 -1.00 dB  
 PL1W 13.2815662 W  
 SFO1 300.1318534 MHz  
 SI 32768  
 SF 300.1300203 MHz  
 WDW EM  
 SSB 0  
 LB 0.30 Hz  
 GB 0  
 PC 1.00

**<sup>1</sup>H-NMR (300 MHz, CDCl<sub>3</sub>) spectrum of compound 3e**

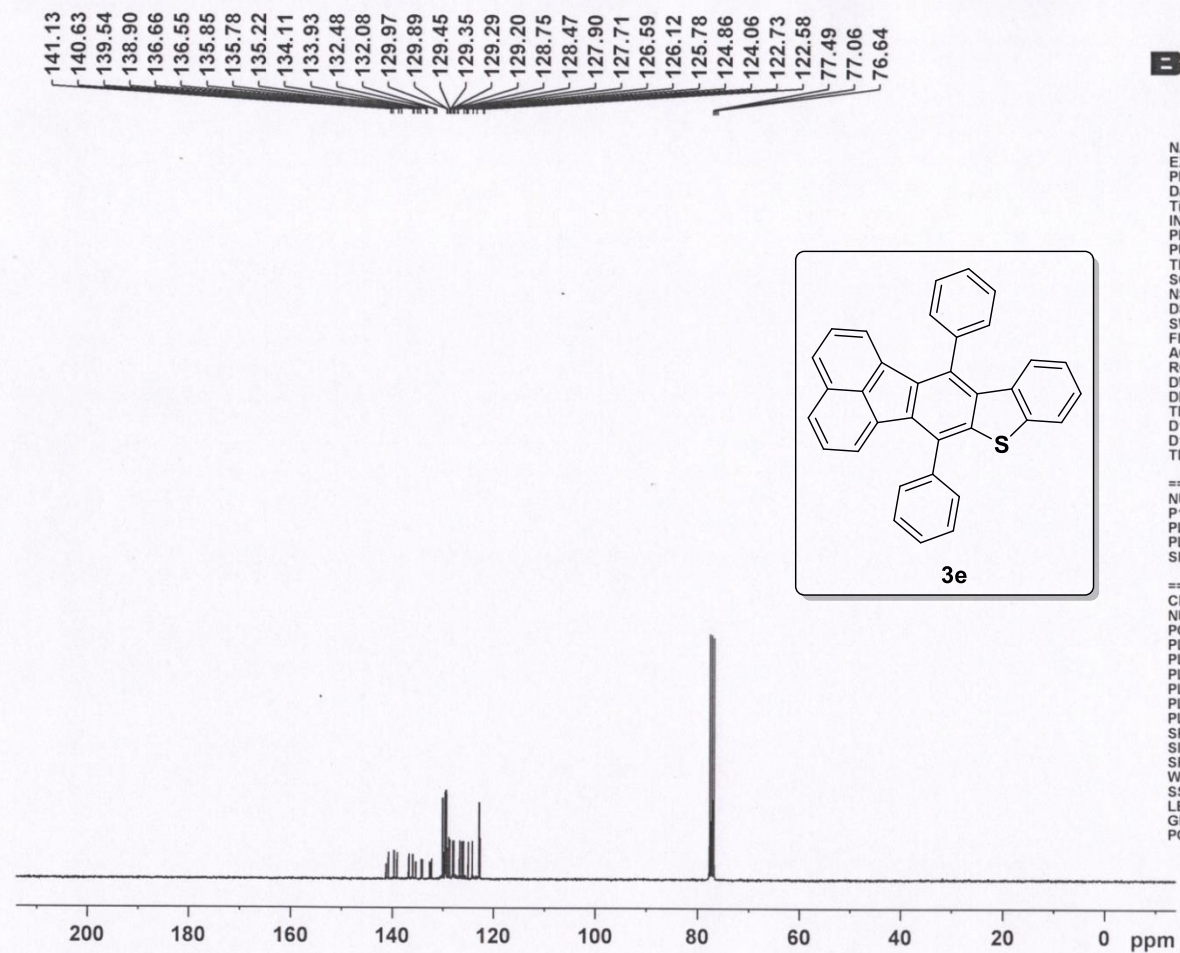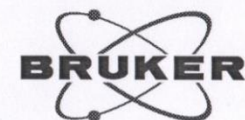

NAME PM-A-202  
EXPNO 7  
PROCNO 1  
Date\_ 20180818  
Time 17.12  
INSTRUM spect  
PROBHD 5 mm DUL 13C-1  
PULPROG zgpg30  
TD 65536  
SOLVENT CDCl3  
NS 1024  
DS 4  
SWH 17985.611 Hz  
FIDRES 0.274439 Hz  
AQ 1.8219508 sec  
RG 2048  
DW 27.800 usec  
DE 6.50 usec  
TE 300.0 K  
D1 2.00000000 sec  
D11 0.03000000 sec  
TD0 1

===== CHANNEL f1 =====  
NUC1 13C  
P1 10.68 usec  
PL1 0.00 dB  
PL1W 31.39858055 W  
SFO1 75.4752953 MHz

===== CHANNEL f2 =====  
CPDPRG2 waltz16  
NUC2 1H  
PCPD2 80.00 usec  
PL2 -1.00 dB  
PL12 15.48 dB  
PL13 16.00 dB  
PL2W 13.28156662 W  
PL12W 0.29870972 W  
PL13W 0.26500207 W  
SFO2 300.1312005 MHz  
SI 32768  
SF 75.4677490 MHz  
WDW EM  
SSB 0  
LB 1.00 Hz  
GB 0  
PC 1.40

<sup>13</sup>C-NMR (75 MHz, CDCl<sub>3</sub>) spectrum of compound **3e**

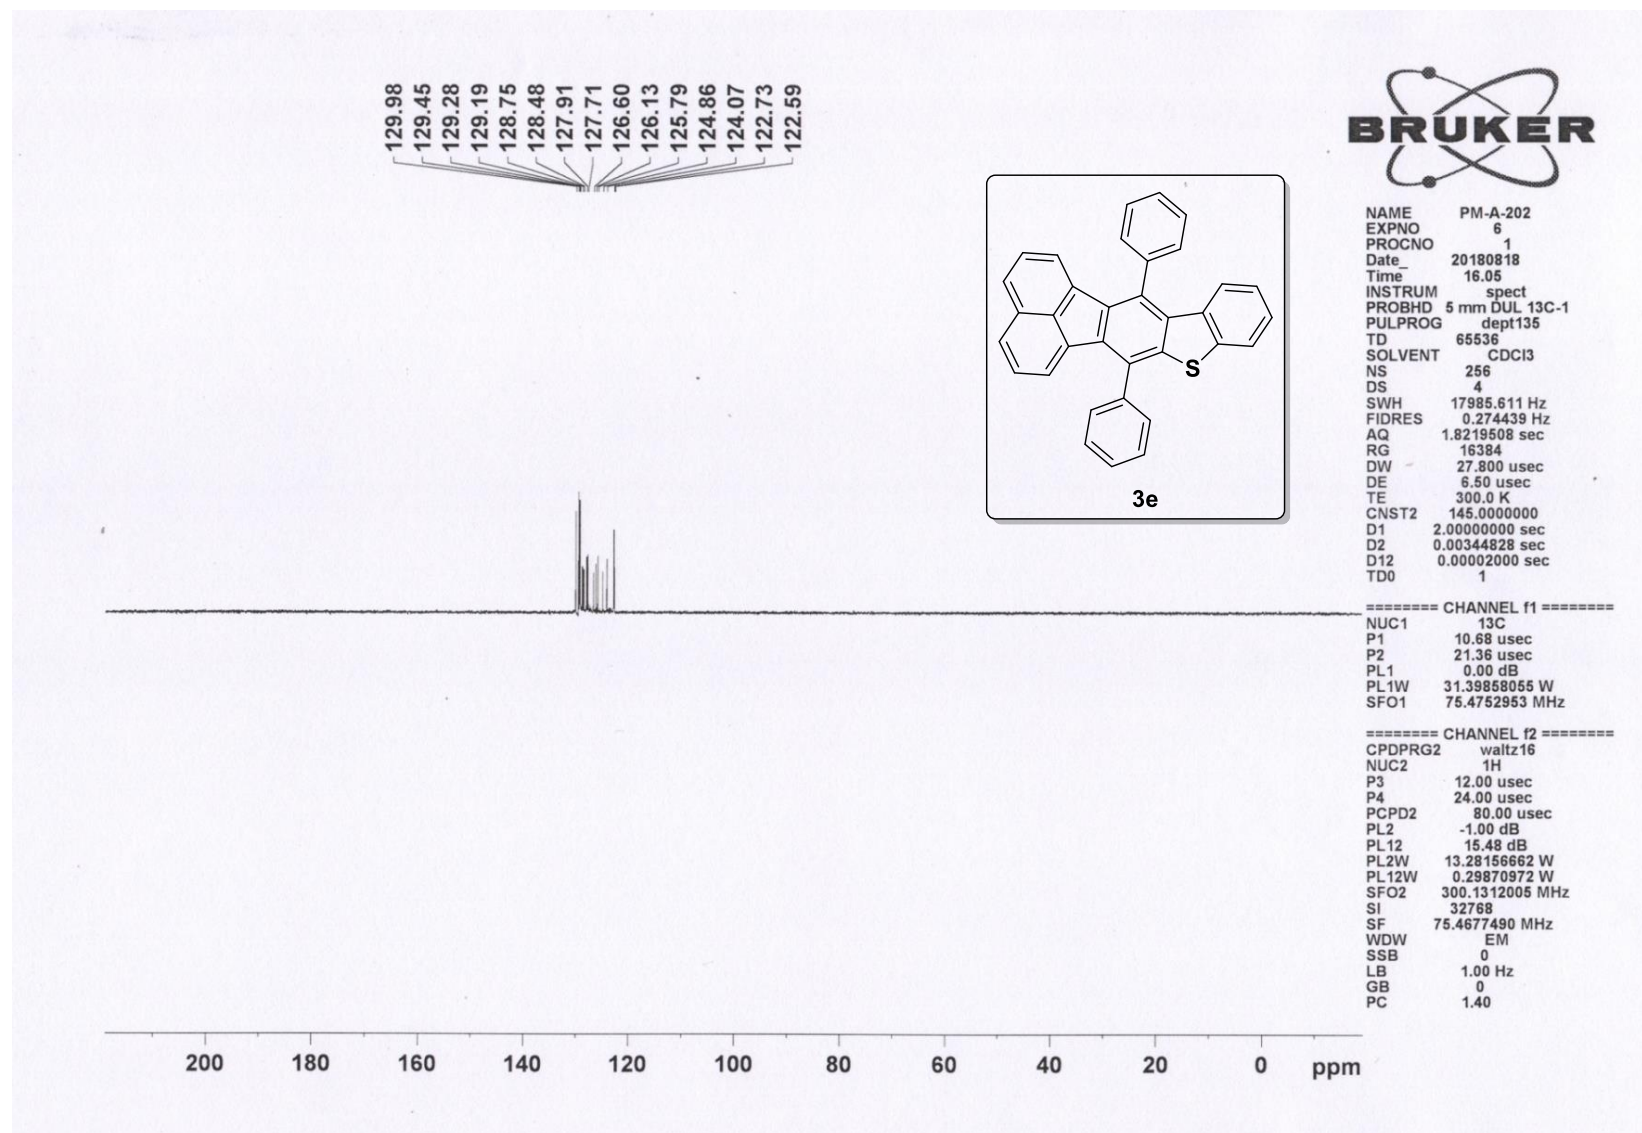

DEPT-135 (75 MHz, CDCl<sub>3</sub>) NMR spectrum of compound **3e**



DEPARTMENT OF ORGANIC CHEMISTRY  
UNIVERSITY OF MADRAS  
DRAKM  
PM-A-202 50 (1.852) AM2 (Ar,20000.0,556.28,0.00,LS 10)

XEVO-G2SQTOF#NotSet

28-Aug-2018  
11:30:08

1: TOF MS ES+  
4.14e6

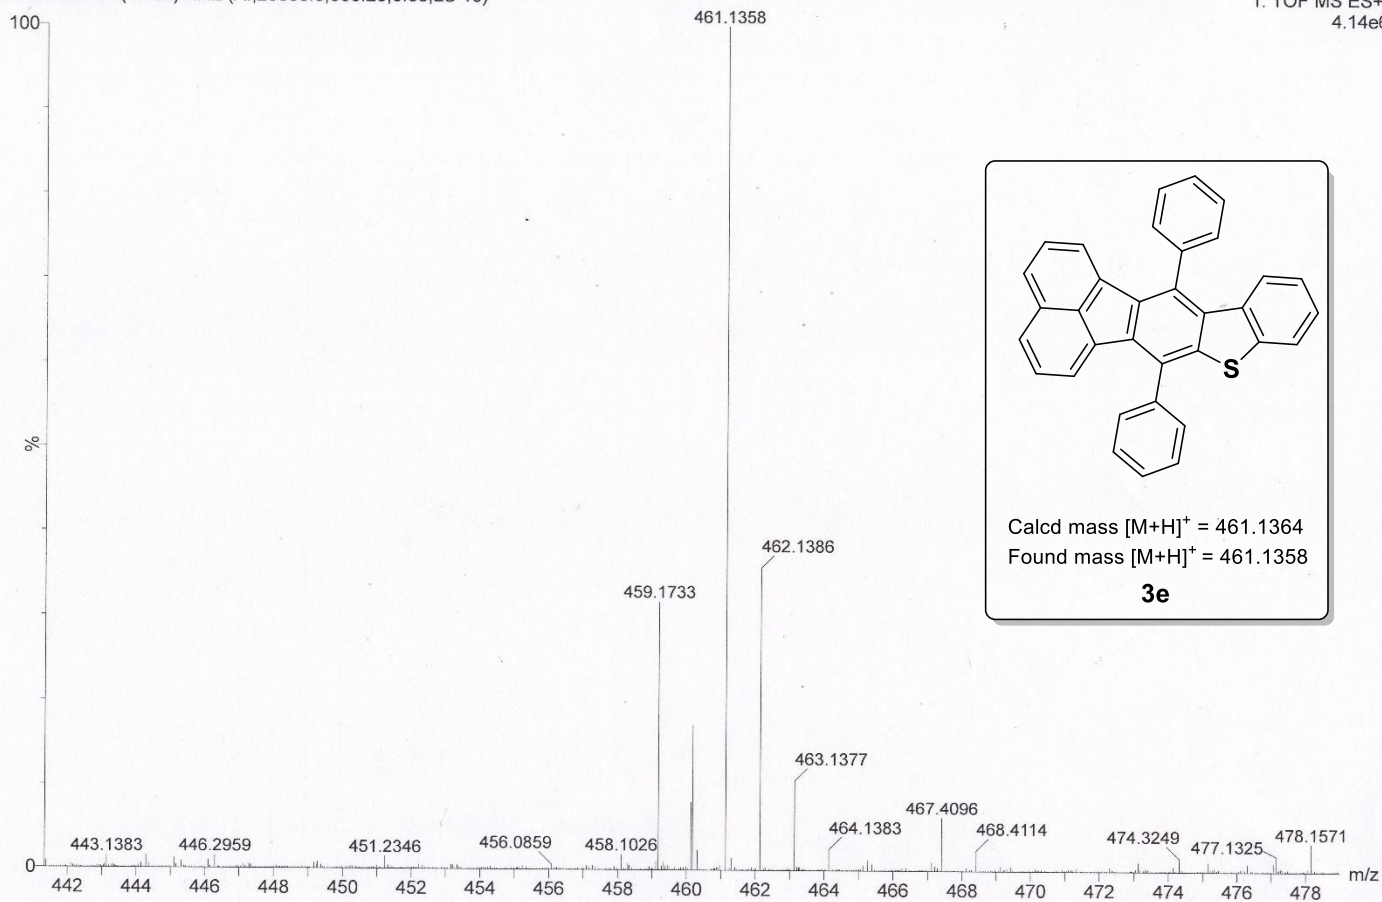

HRMS spectrum of compound **3e**

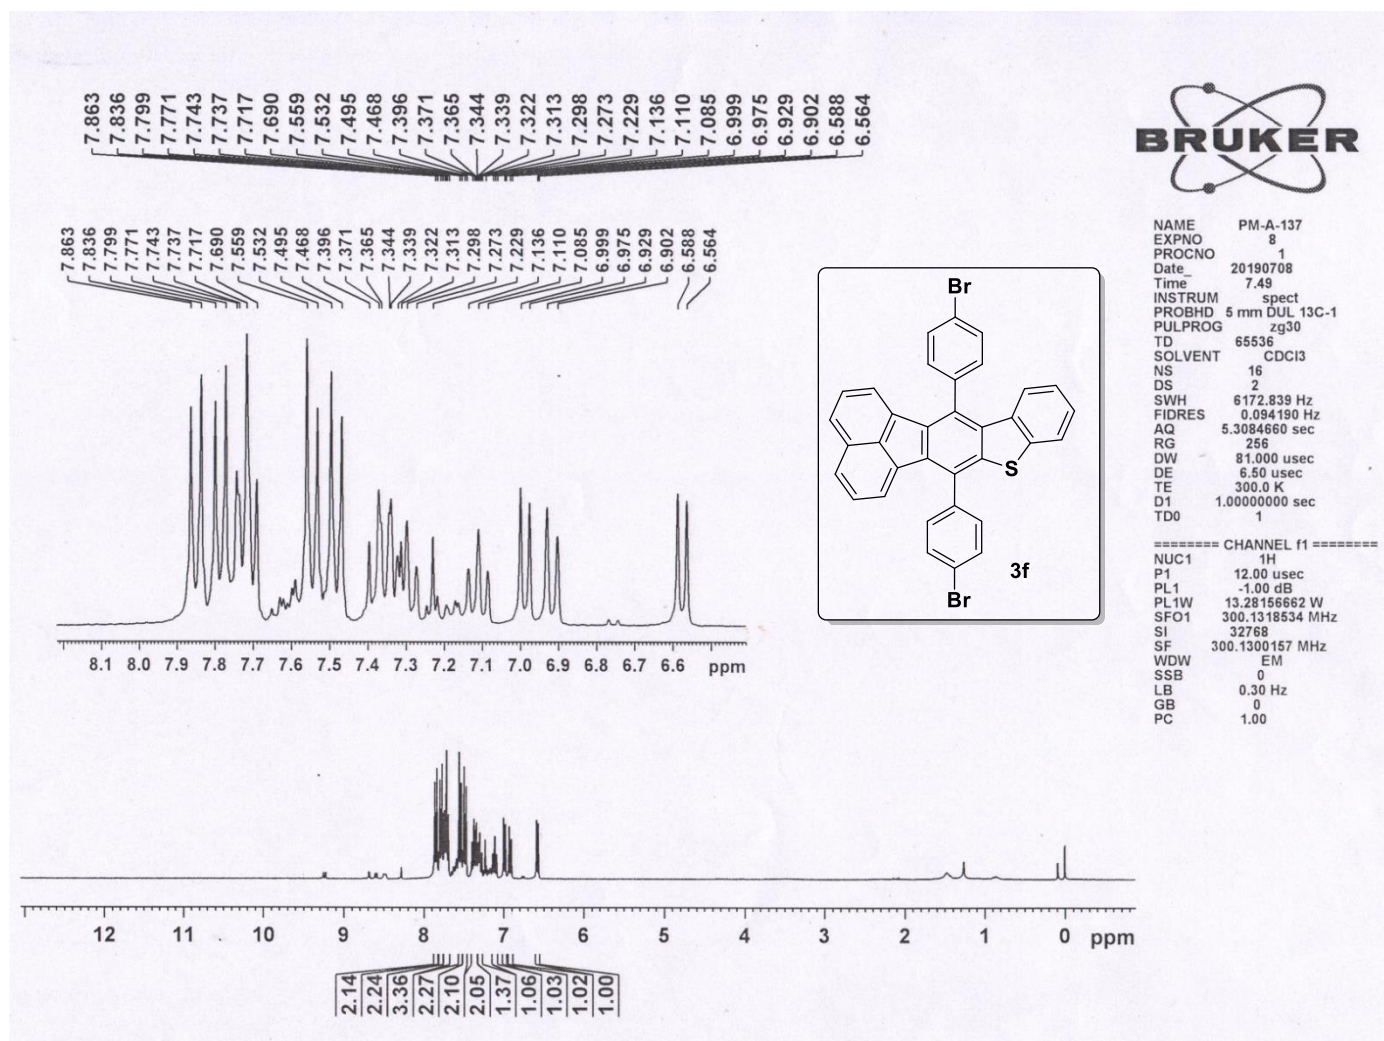

<sup>1</sup>H-NMR (300 MHz, CDCl<sub>3</sub>) spectrum of compound **3f**

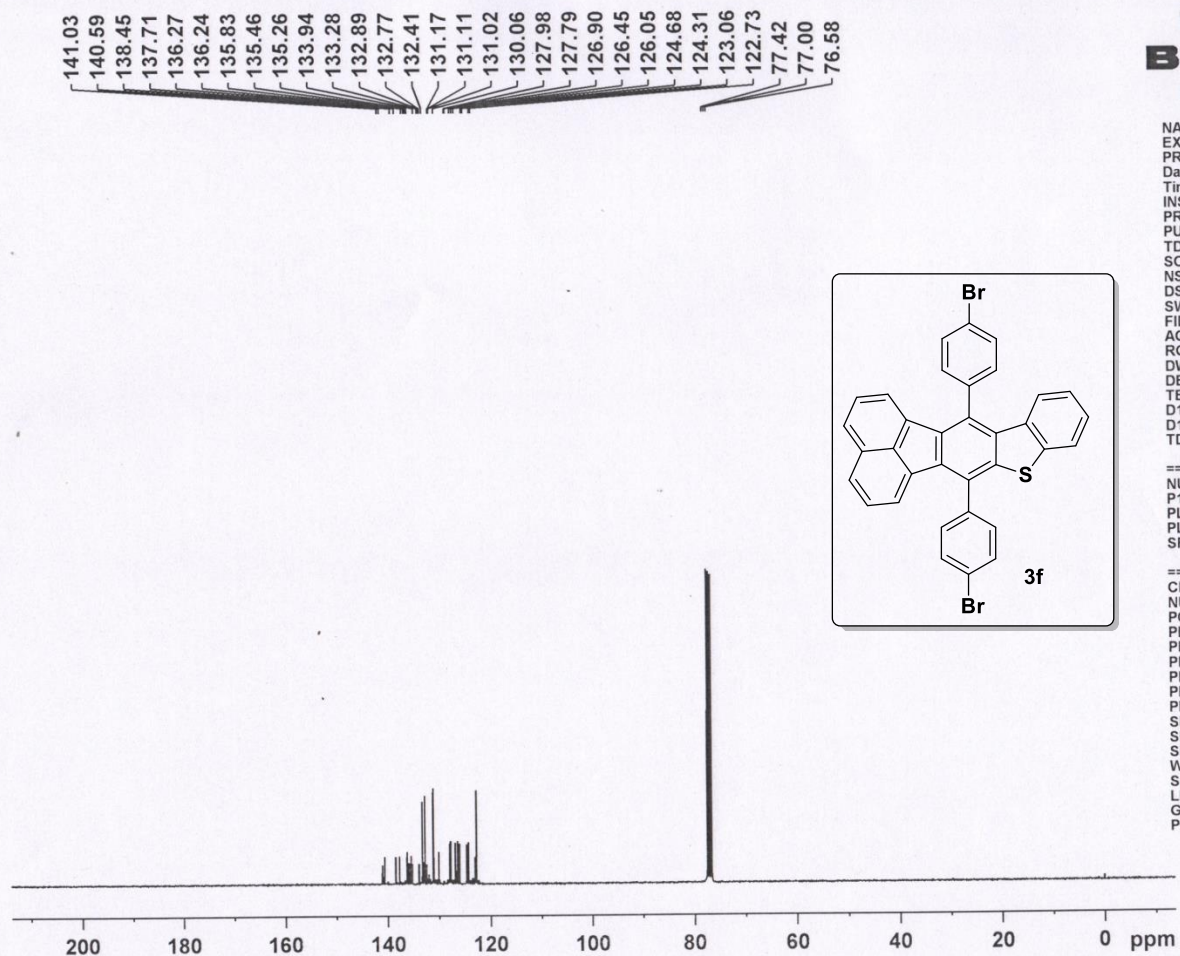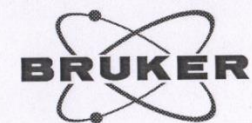

NAME PM-A-137  
 EXPNO 6  
 PROCNO 1  
 Date\_ 20190708  
 Time 6.41  
 INSTRUM spect  
 PROBHD 5 mm DUL 13C-1  
 PULPROG zgpg30  
 TD 65536  
 SOLVENT CDCl3  
 NS 7000  
 DS 4  
 SWH 17985.611 Hz  
 FIDRES 0.274439 Hz  
 AQ 1.8219508 sec  
 RG 2580.3  
 DW 27.800 usec  
 DE 6.50 usec  
 TE 300.0 K  
 D1 2.00000000 sec  
 D11 0.03000000 sec  
 TD0 1

===== CHANNEL f1 =====  
 NUC1 13C  
 P1 10.68 usec  
 PL1 0.00 dB  
 PL1W 31.39858055 W  
 SFO1 75.4752953 MHz

===== CHANNEL f2 =====  
 CPDPRG2 waltz16  
 NUC2 1H  
 PCPD2 80.00 usec  
 PL2 -1.00 dB  
 PL12 15.48 dB  
 PL13 16.00 dB  
 PL2W 13.28156662 W  
 PL12W 0.29870972 W  
 PL13W 0.26500207 W  
 SFO2 300.1312005 MHz  
 SI 32768  
 SF 75.4677455 MHz  
 WDW EM  
 SSB 0  
 LB 1.00 Hz  
 GB 0  
 PC 1.40

<sup>13</sup>C-NMR (75 MHz, CDCl<sub>3</sub>) spectrum of compound **3f**



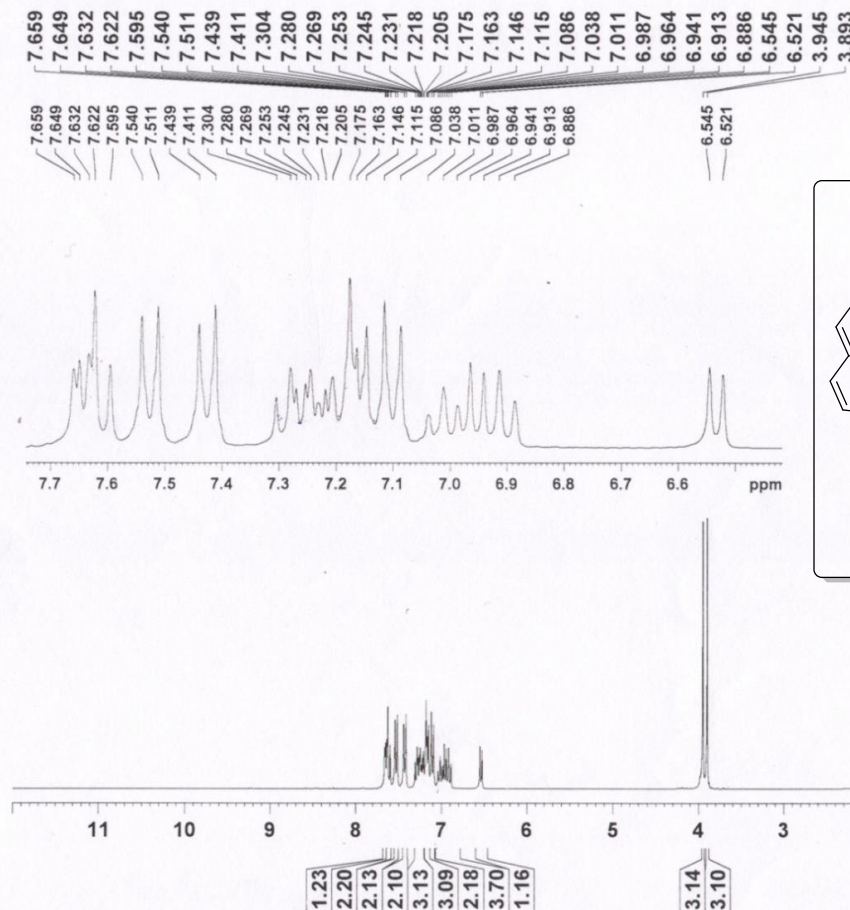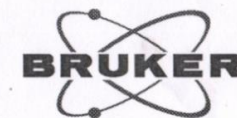

NAME MS-138-SPOT-1  
 EXPNO 1  
 PROCNO 1  
 Date\_ 20180409  
 Time 15.21  
 INSTRUM spect  
 PROBHD 5 mm DUL 13C-1  
 PULPROG zg30  
 TD 65536  
 SOLVENT CDCl3  
 NS 16  
 DS 2  
 SWH 6172.839 Hz  
 FIDRES 0.094190 Hz  
 AQ 5.3084660 sec  
 RG 181  
 DW 81.000 usec  
 DE 6.50 usec  
 TE 300.0 K  
 D1 1.00000000 sec  
 TD0 1

===== CHANNEL f1 =====  
 NUC1 1H  
 P1 12.00 usec  
 PL1 -1.00 dB  
 PL1W 13.2815662 W  
 SFO1 300.1318534 MHz  
 SI 32768  
 SF 300.1300362 MHz  
 WDW EM  
 SSB 0  
 LB 0.30 Hz  
 GB 0  
 PC 1.00

<sup>1</sup>H-NMR (300 MHz, CDCl<sub>3</sub>) spectrum of compound **4a**

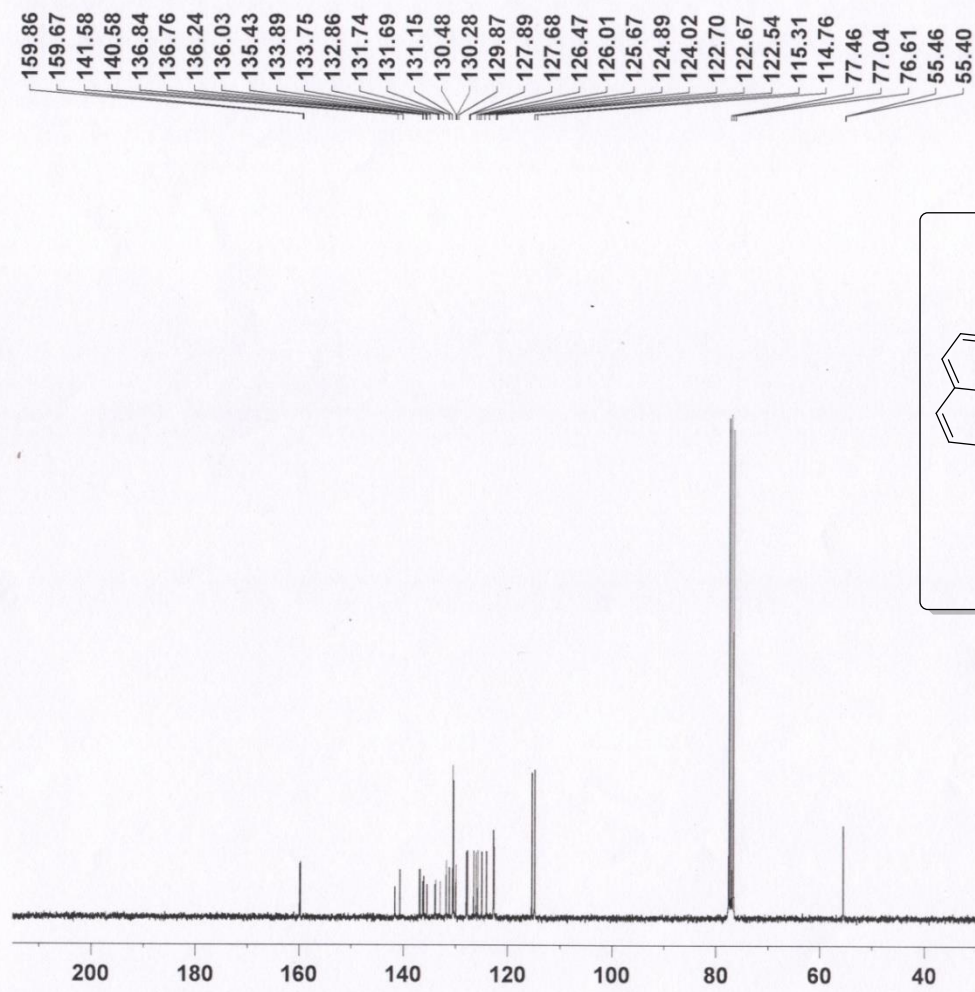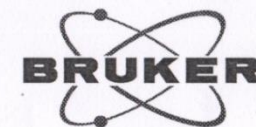

NAME JK-MS-138  
 EXPNO 2  
 PROCNO 1  
 Date 20180411  
 Time 18.30  
 INSTRUM spect  
 PROBHD 5 mm DUL 13C-1  
 PULPROG zgpg30  
 TD 65536  
 SOLVENT CDCl3  
 NS 1024  
 DS 4  
 SWH 17985.611 Hz  
 FIDRES 0.274439 Hz  
 AQ 1.8219508 sec  
 RG 1625.5  
 DW 27.800 usec  
 DE 6.50 usec  
 TE 300.0 K  
 D1 2.00000000 sec  
 D11 0.03000000 sec  
 TD0 1

===== CHANNEL f1 =====  
 NUC1 13C  
 P1 10.68 usec  
 PL1 0.00 dB  
 PL1W 31.39858055 W  
 SFO1 75.4752953 MHz

===== CHANNEL f2 =====  
 CPDPRG2 waltz16  
 NUC2 1H  
 PCPD2 80.00 usec  
 PL2 -1.00 dB  
 PL12 15.48 dB  
 PL13 16.00 dB  
 PL2W 13.28156662 W  
 PL12W 0.29870972 W  
 PL13W 0.26500207 W  
 SFO2 300.1312005 MHz  
 SI 32768  
 SF 75.4677490 MHz  
 WDW EM  
 SSB 0  
 LB 1.00 Hz  
 GB 0  
 PC 1.40

<sup>13</sup>C-NMR (75 MHz, CDCl<sub>3</sub>) spectrum of compound 4a



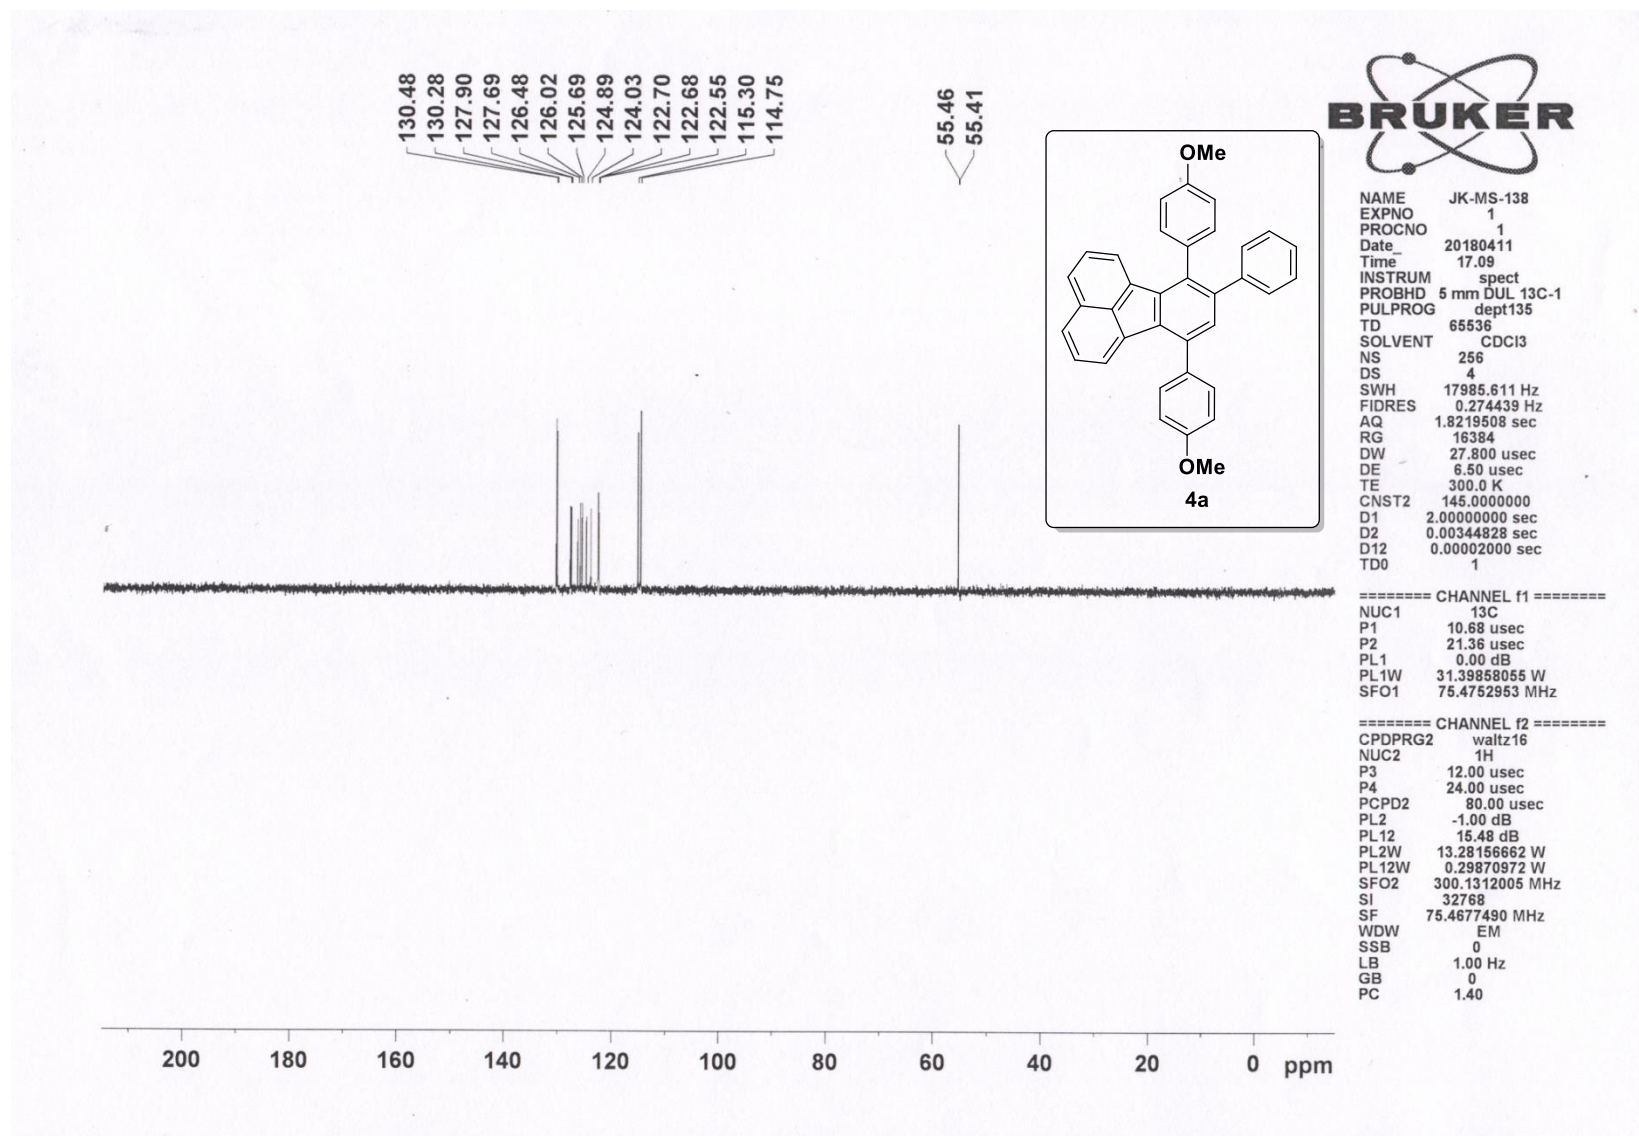

DEPT-135 (75 MHz, CDCl<sub>3</sub>) NMR spectrum of compound **4a**

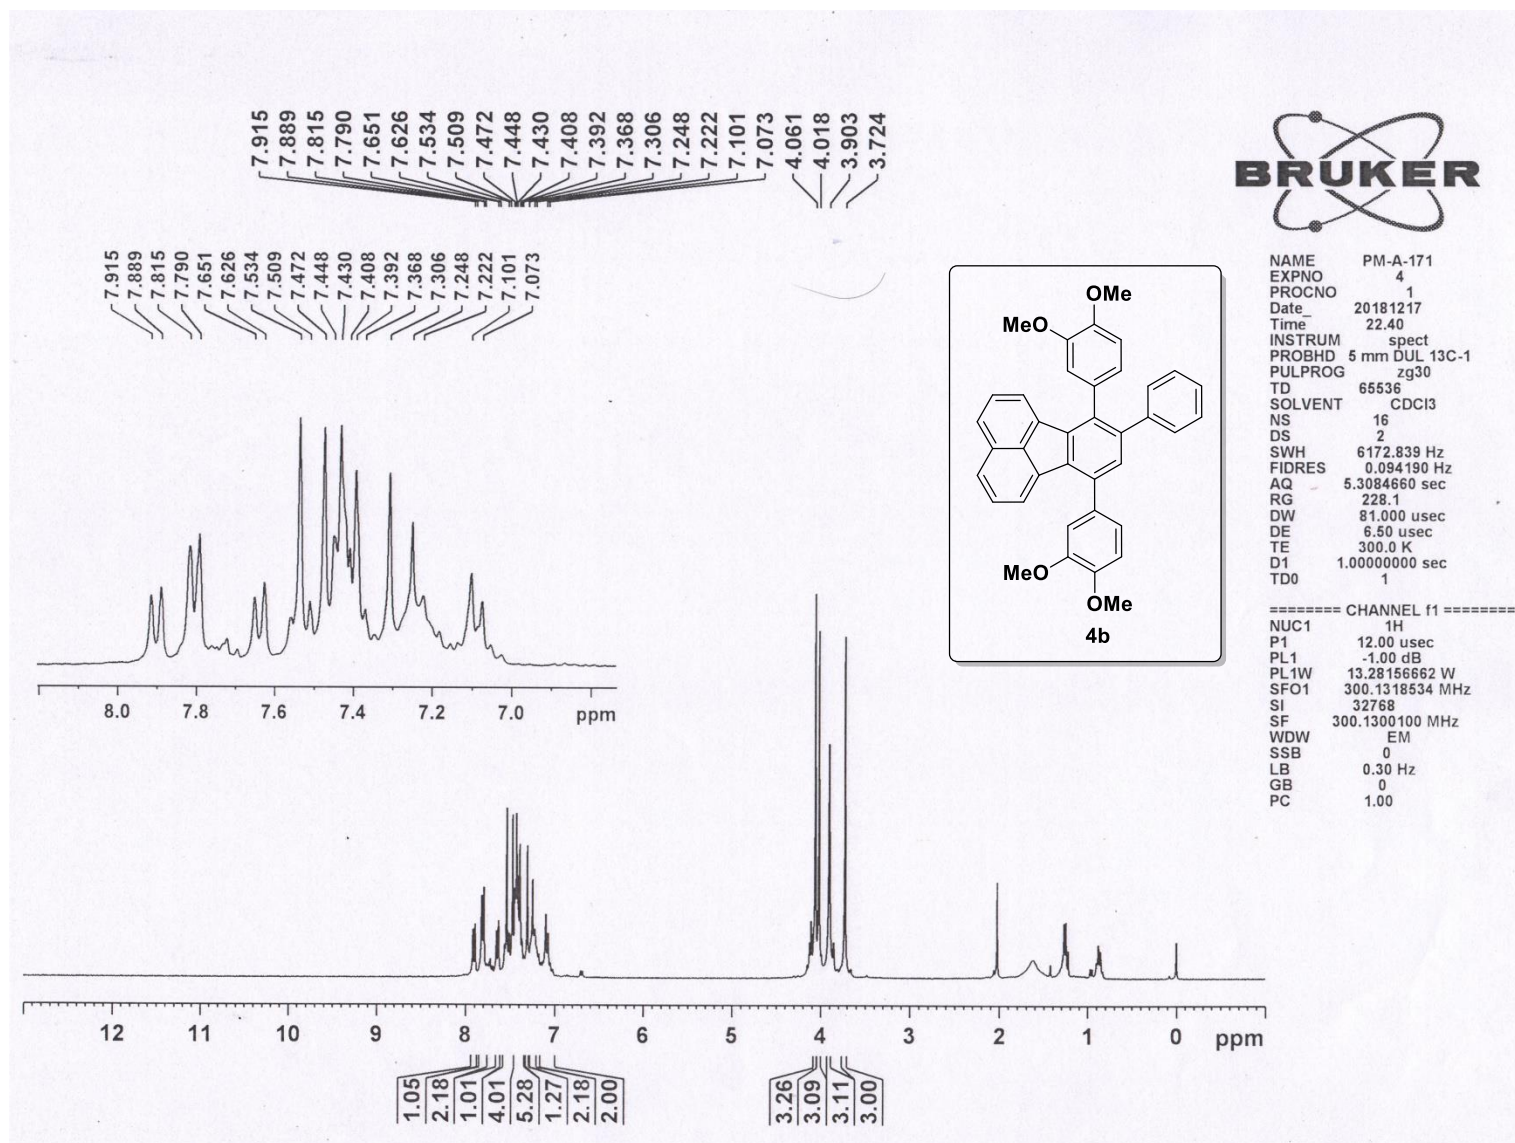

<sup>1</sup>H-NMR (300 MHz, CDCl<sub>3</sub>) spectrum of compound **4b**

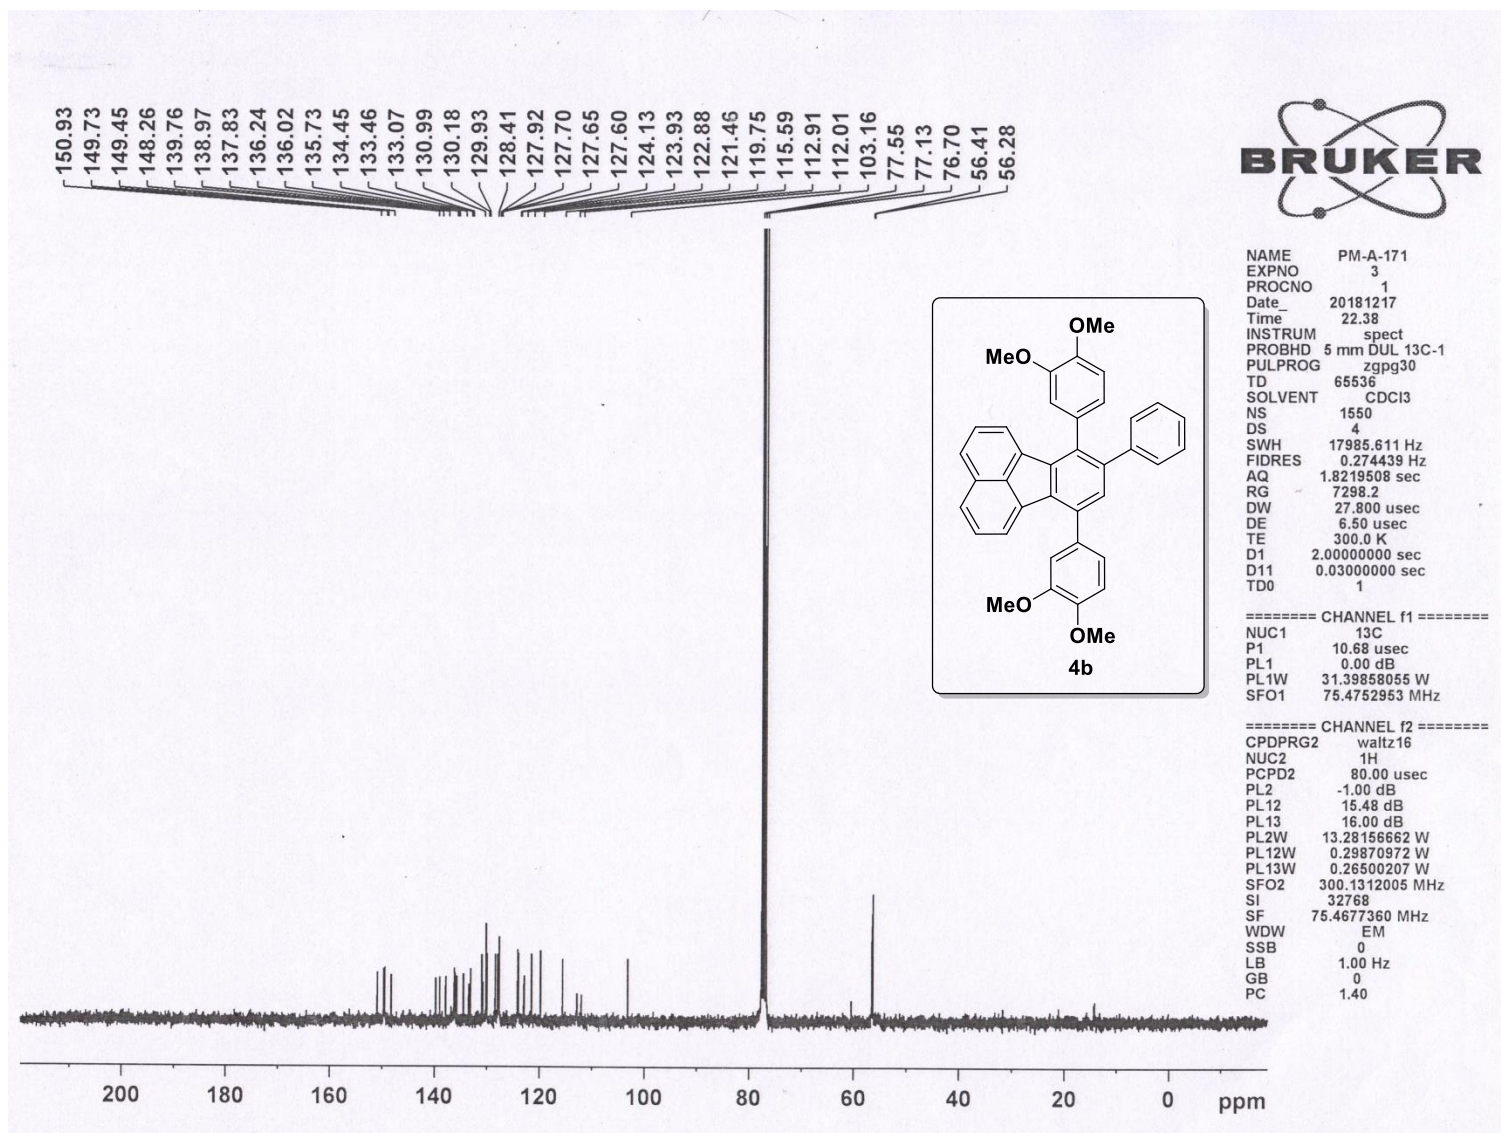

$^{13}\text{C}$ -NMR (75 MHz,  $\text{CDCl}_3$ ) spectrum of compound **4b**



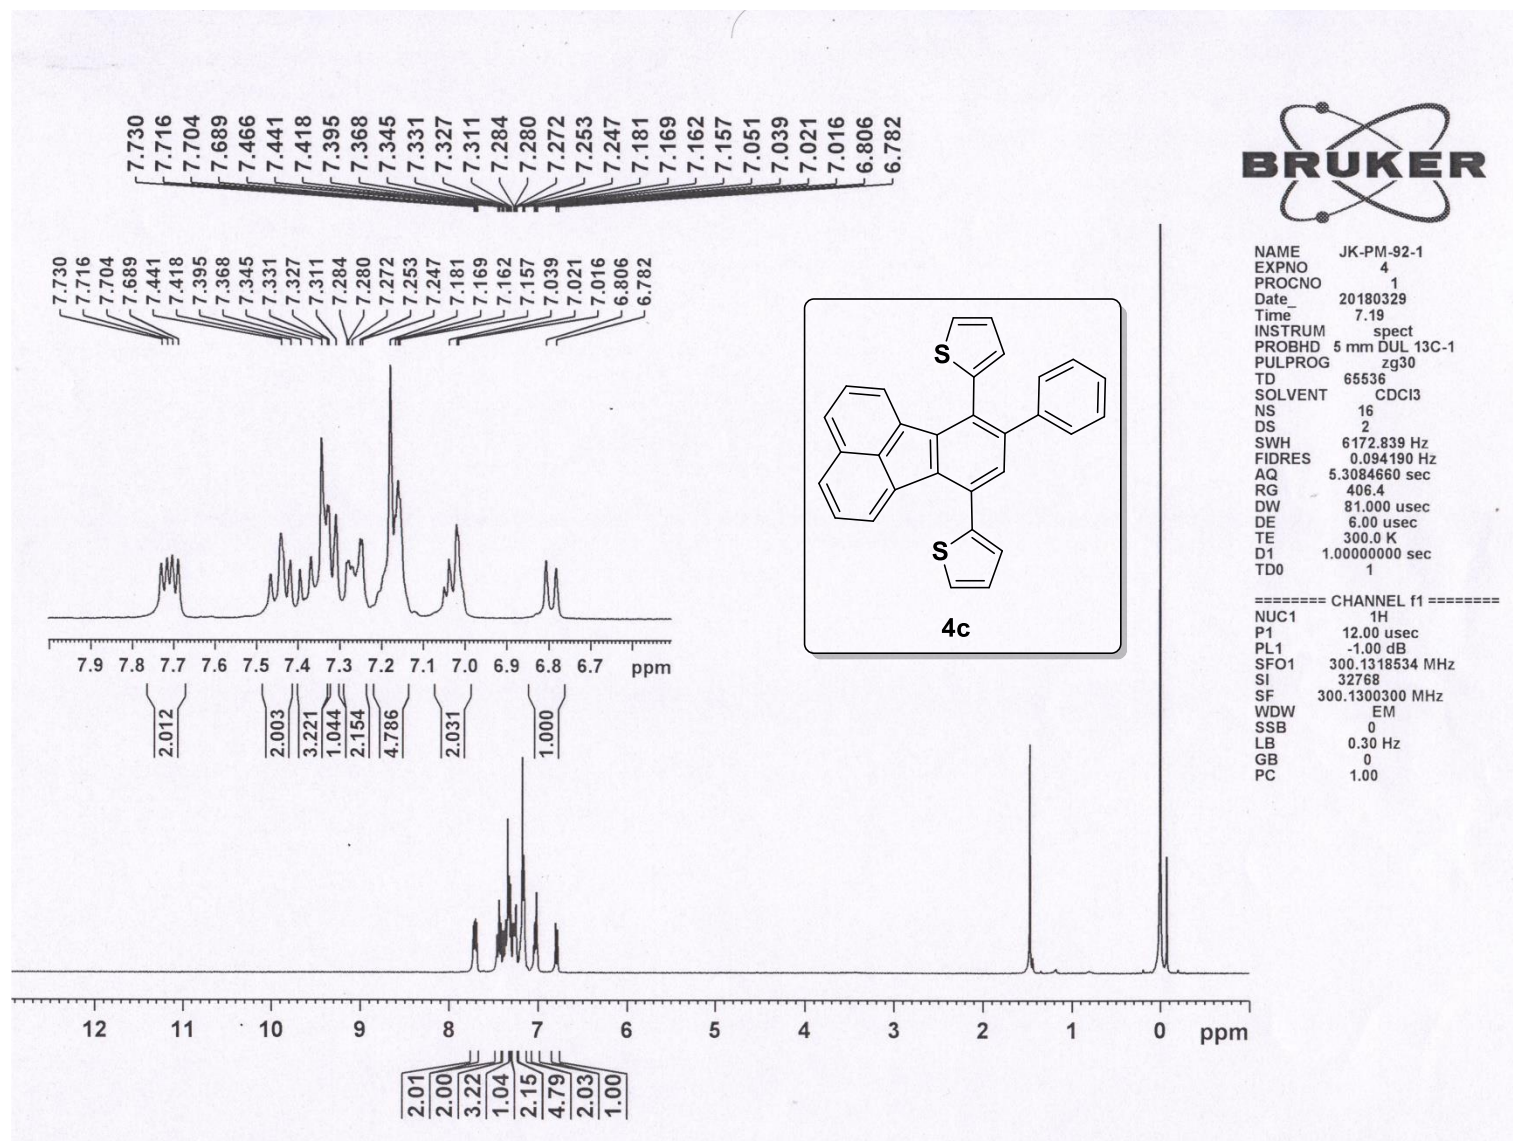

<sup>1</sup>H-NMR (300 MHz, CDCl<sub>3</sub>) spectrum of compound **4c**

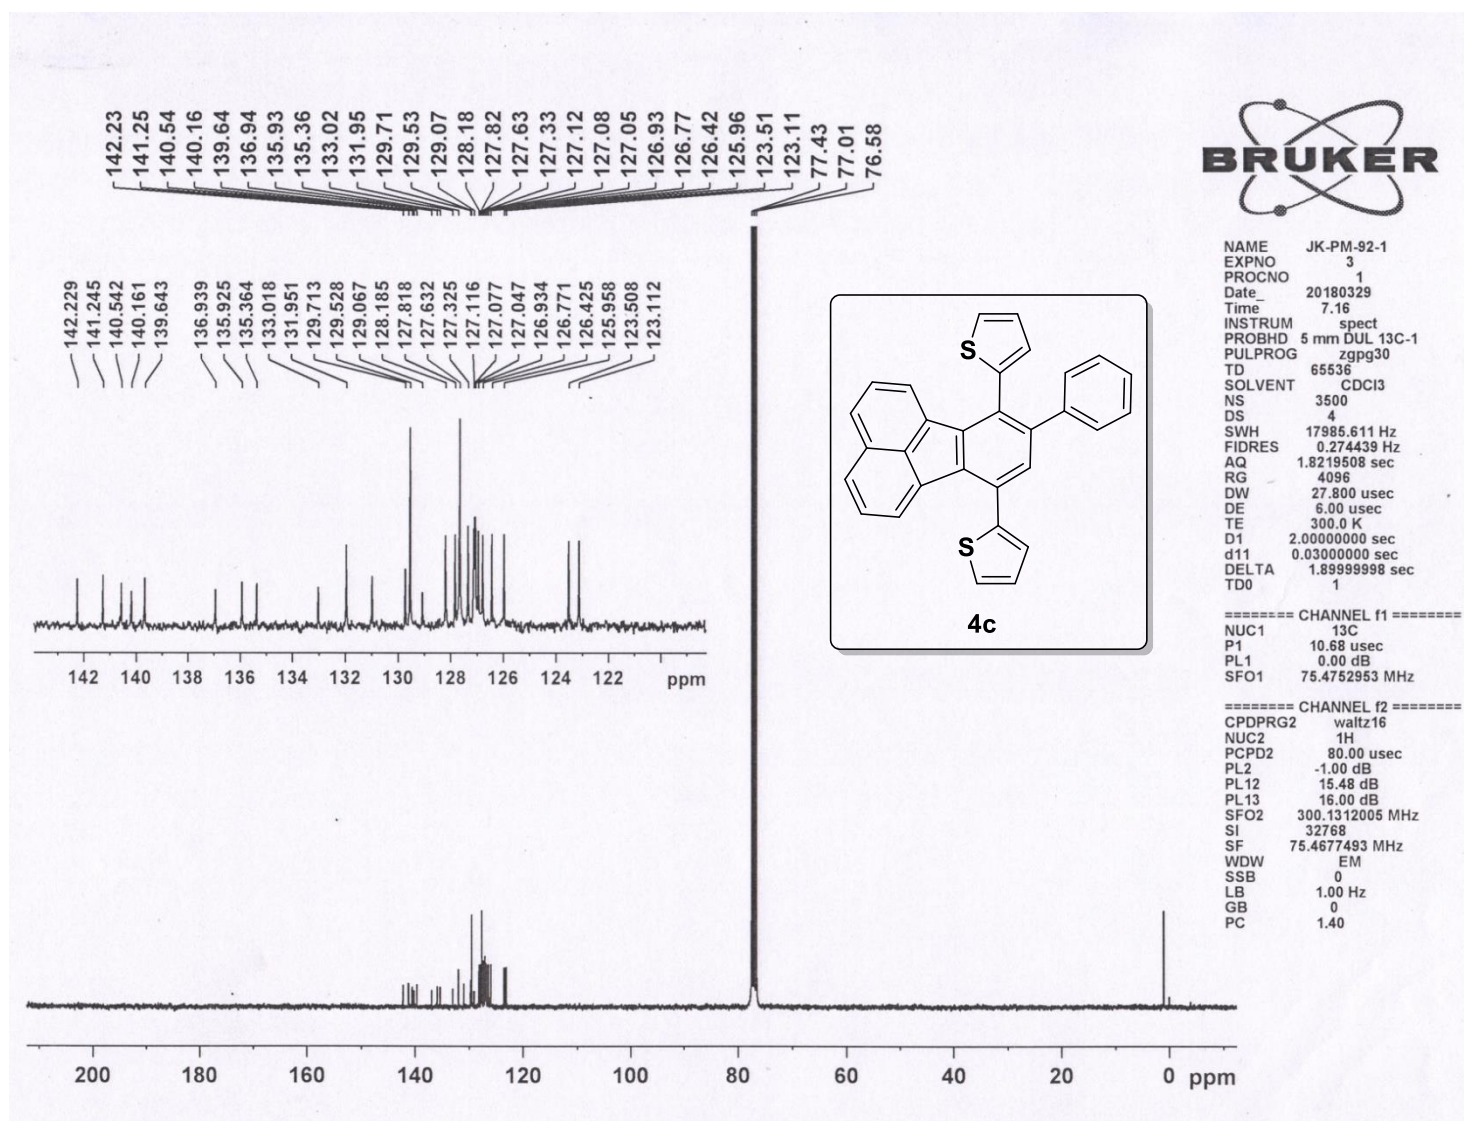

<sup>13</sup>C-NMR (75 MHz, CDCl<sub>3</sub>) spectrum of compound **4c**

DEPARTMENT OF ORGANIC CHEMISTRY  
UNIVERSITY OF MADRAS  
DRAKM

XEVO-G2SQTOF#NotSet

26-Mar-2018  
09:56:10

JK-MS-93-92 9 (0.364) AM2 (Ar,20000.0,556.28,0.00,LS 10); Cm (6:15)

1: TOF MS ES+  
5.64e6

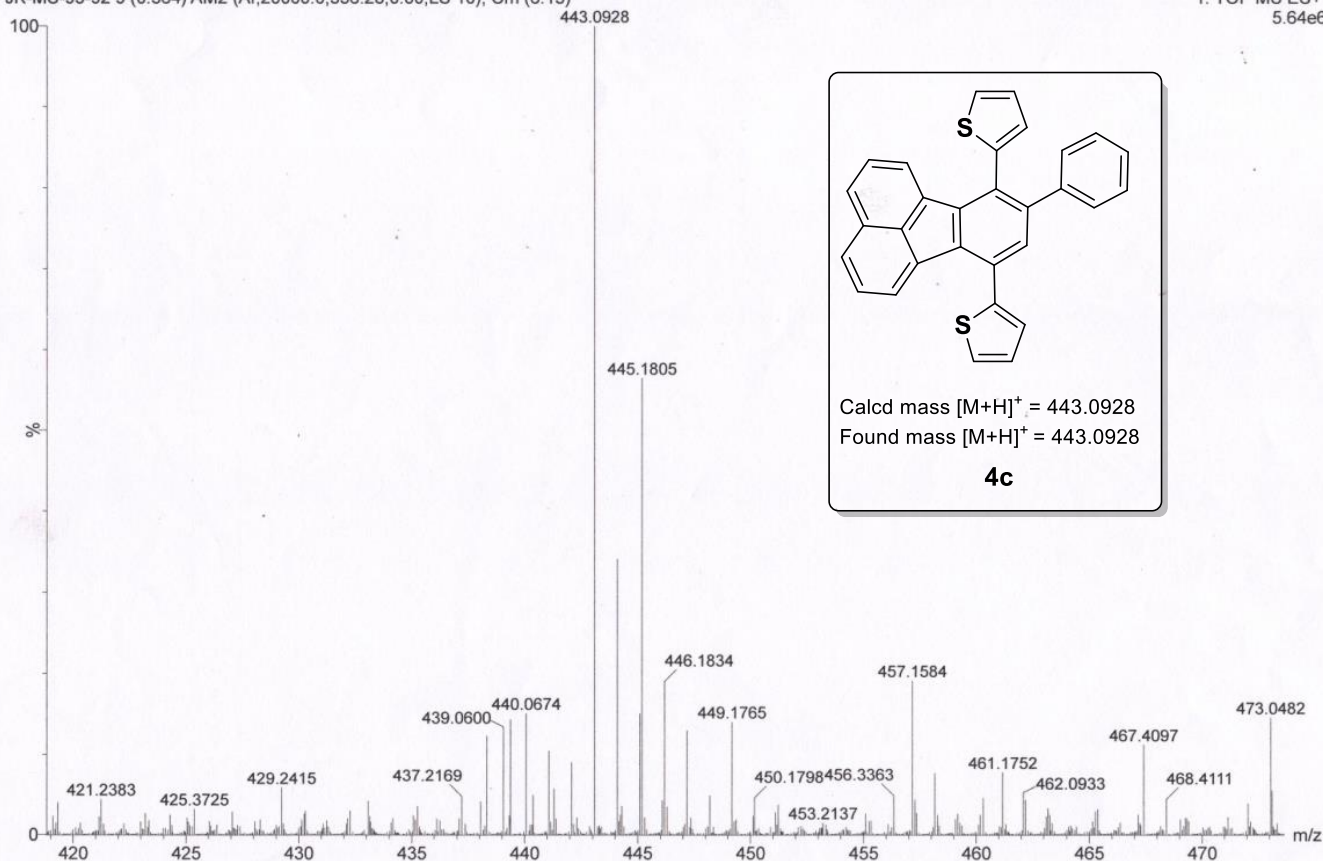

HRMS spectrum of compound **4c**



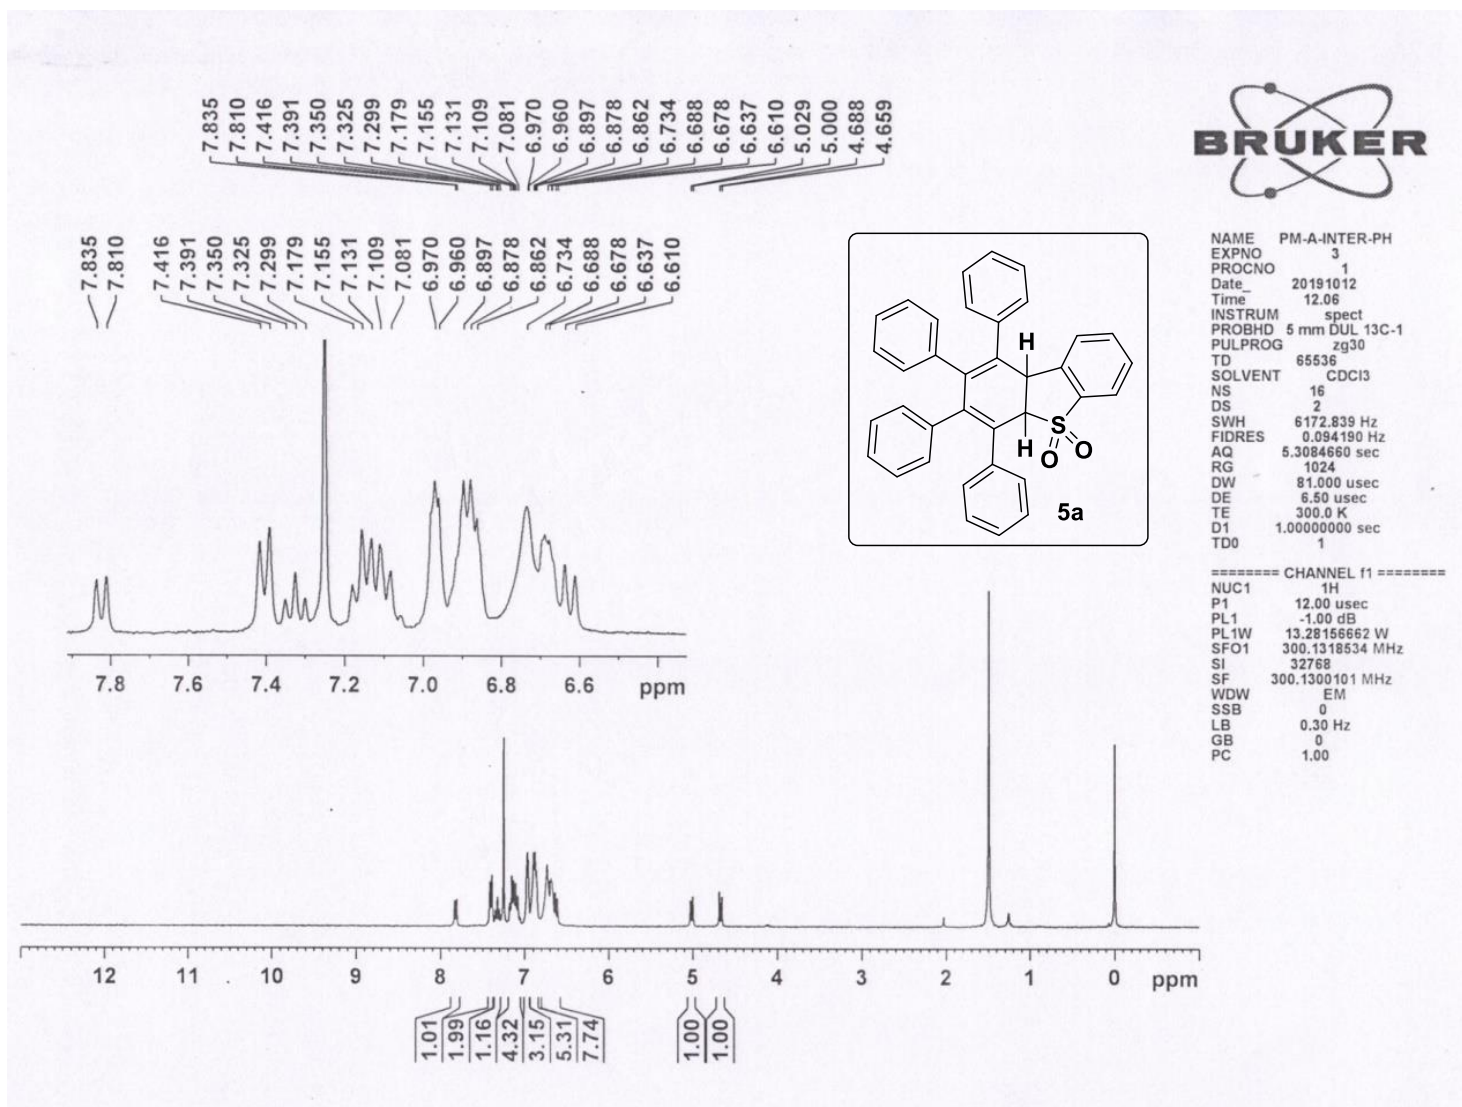

<sup>1</sup>H NMR (300MHz, CDCl<sub>3</sub>) spectrum of compound **5a**

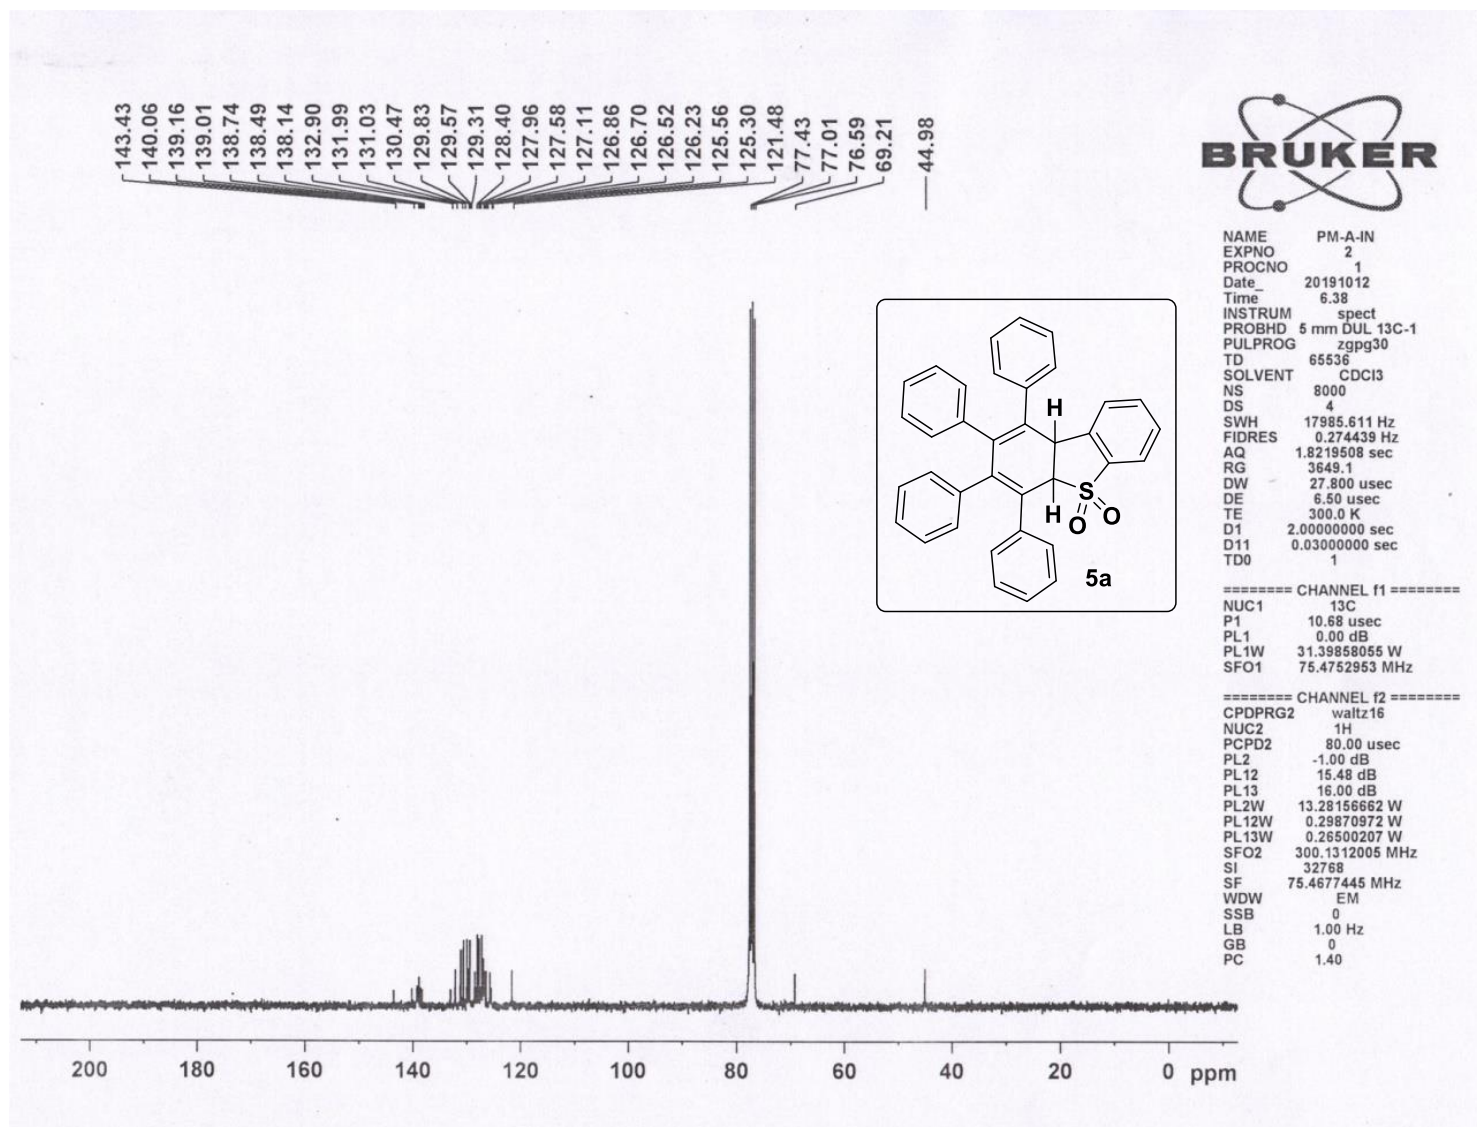

$^{13}\text{C}$ -NMR (75 MHz,  $\text{CDCl}_3$ ) spectrum of compound **5a**



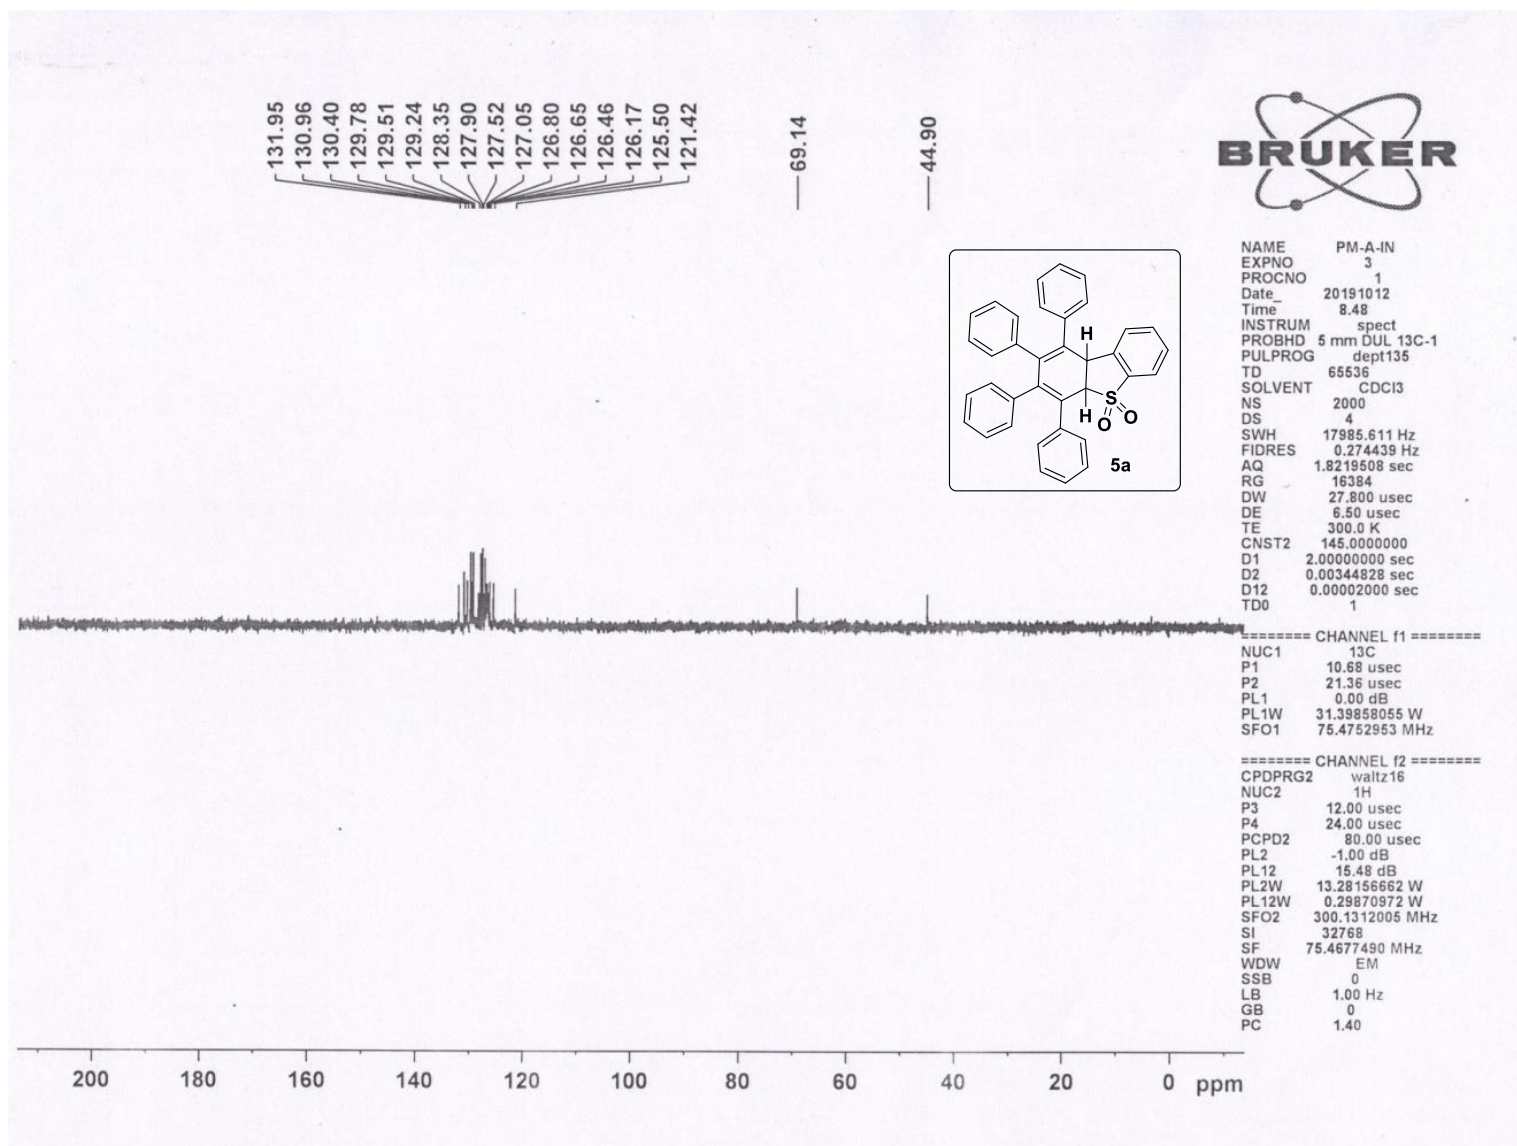

DEPT-135 (75 MHz, CDCl<sub>3</sub>) NMR spectrum of compound **5a**

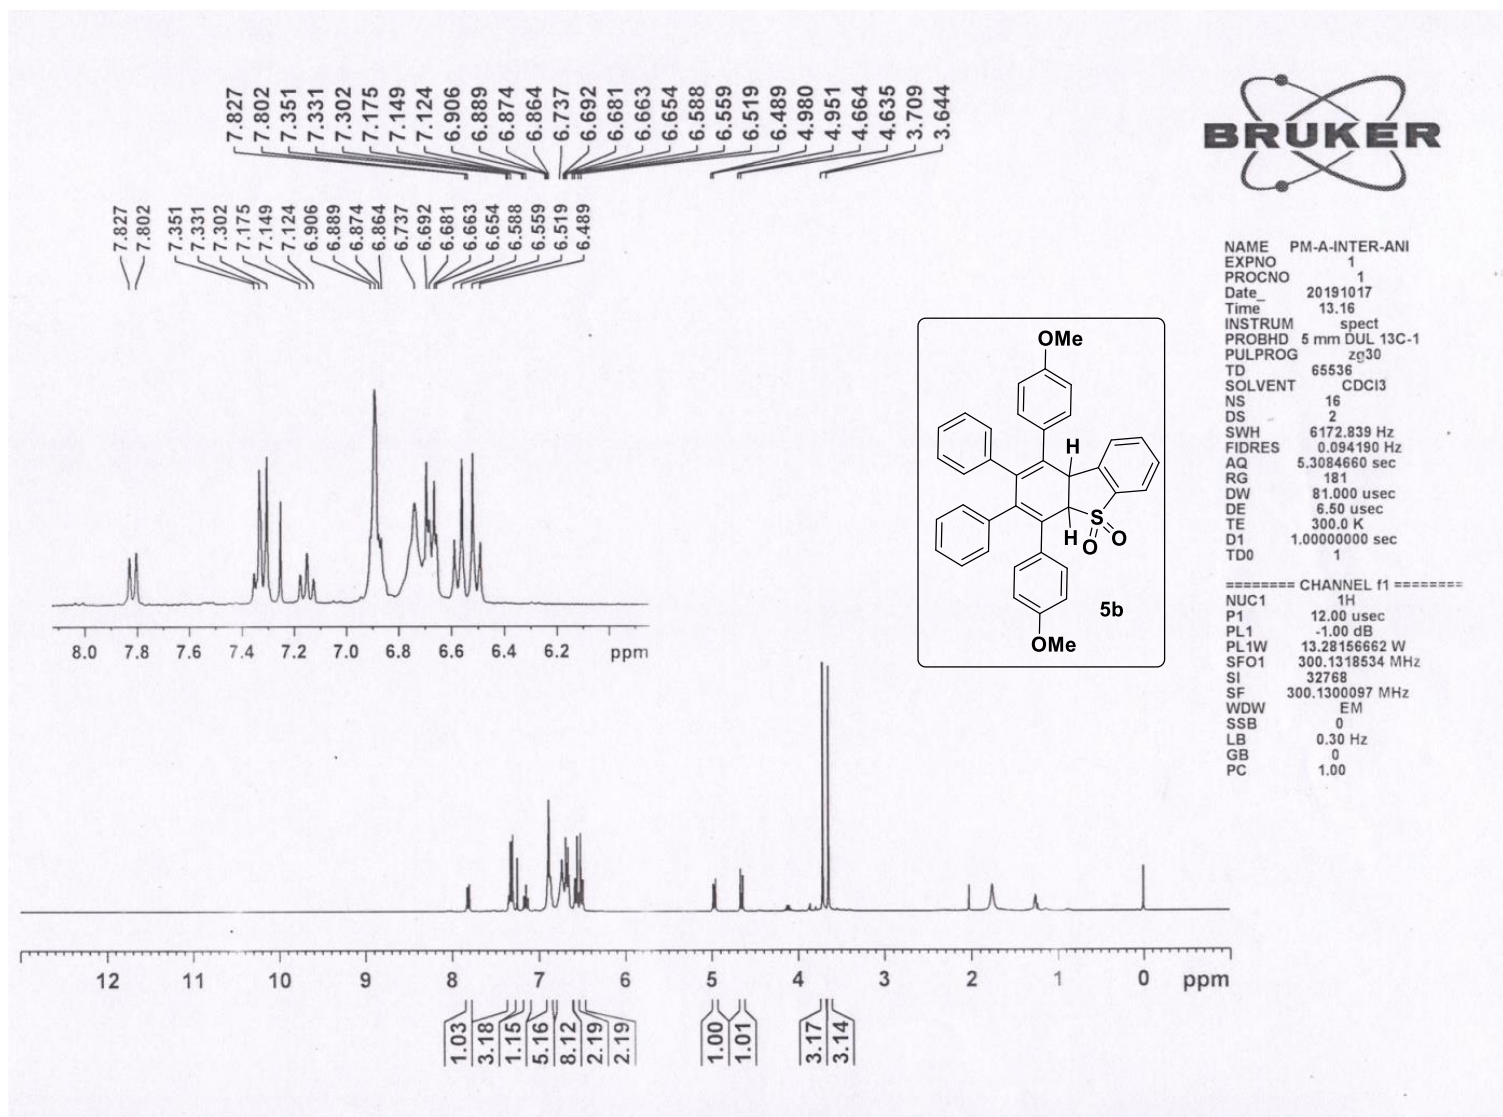

<sup>1</sup>H-NMR (300 MHz, CDCl<sub>3</sub>) spectrum of compound **5b**

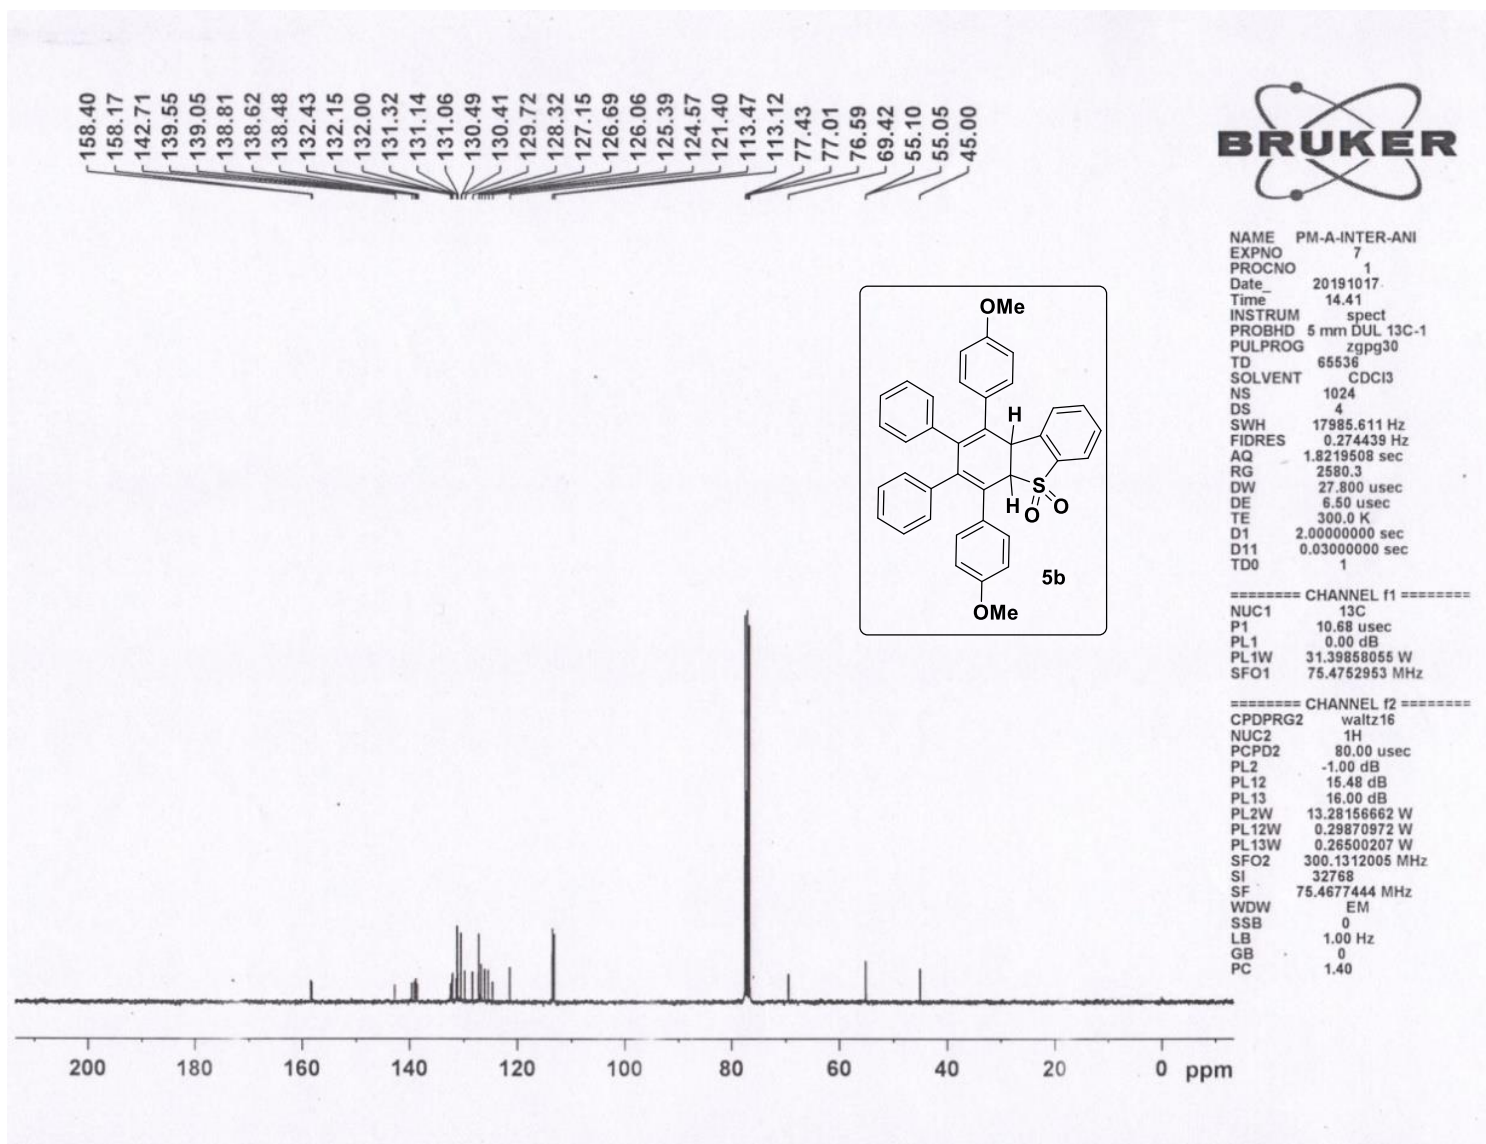

$^{13}\text{C}$ -NMR (75 MHz,  $\text{CDCl}_3$ ) spectrum of compound **5b**



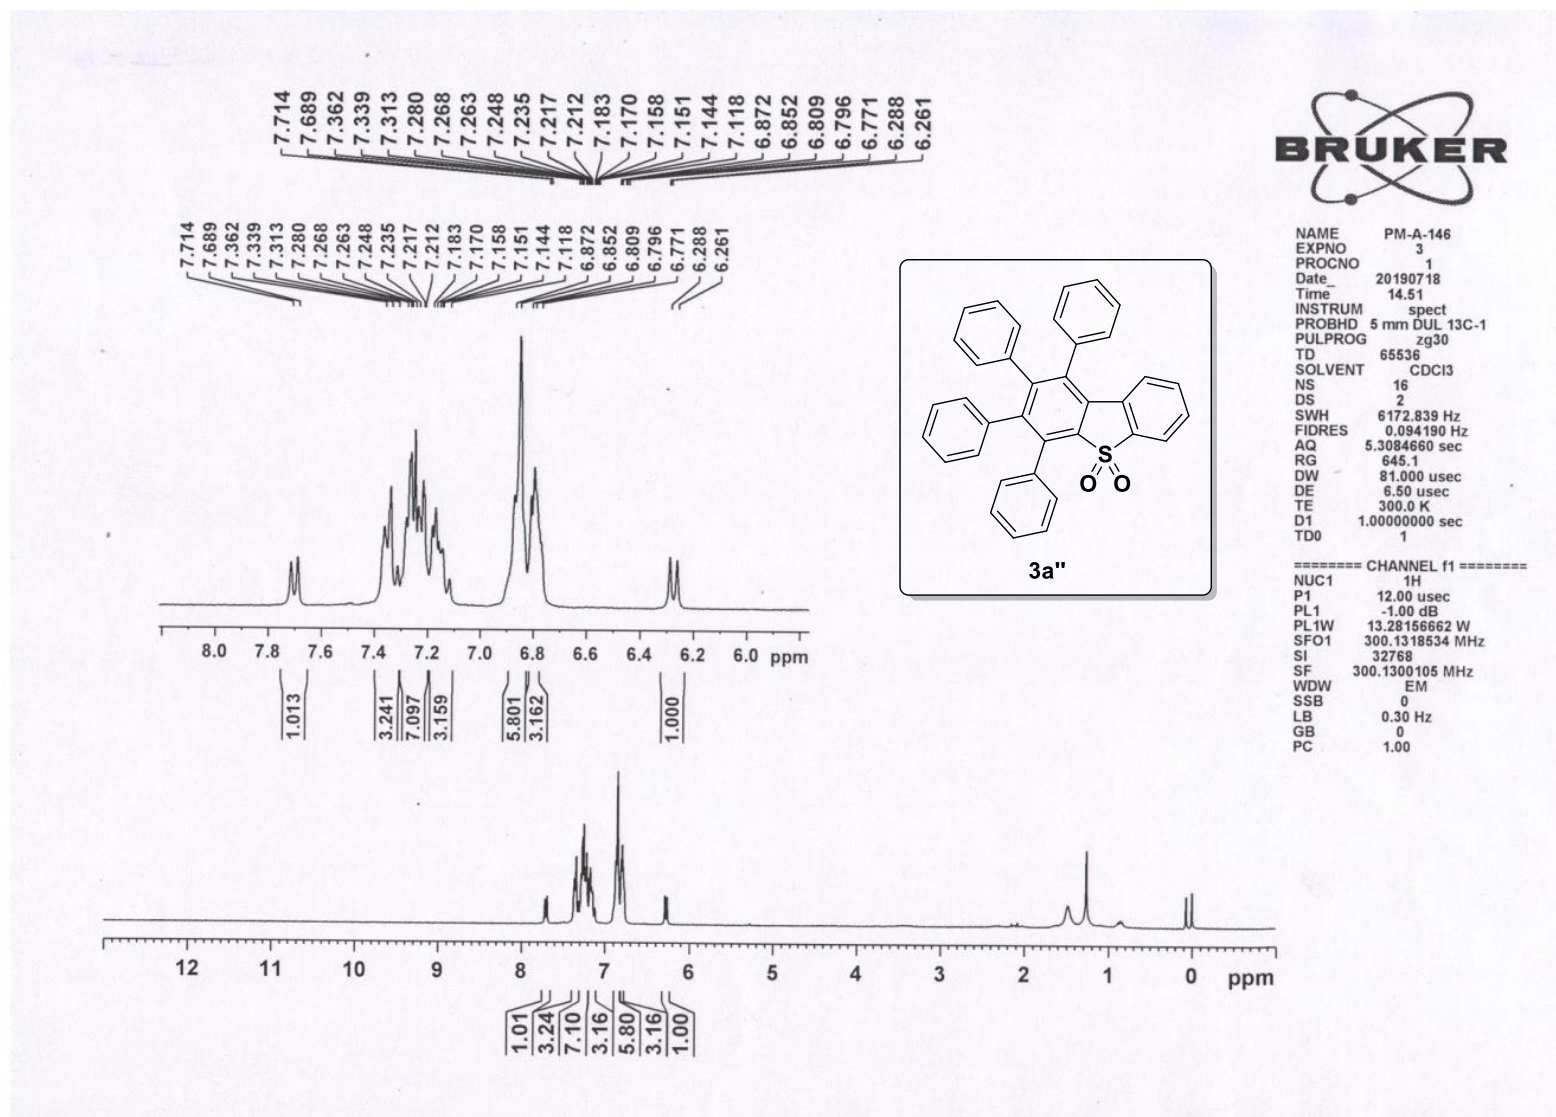

<sup>1</sup>H-NMR (300 MHz, CDCl<sub>3</sub>) spectrum of compound **3a''**

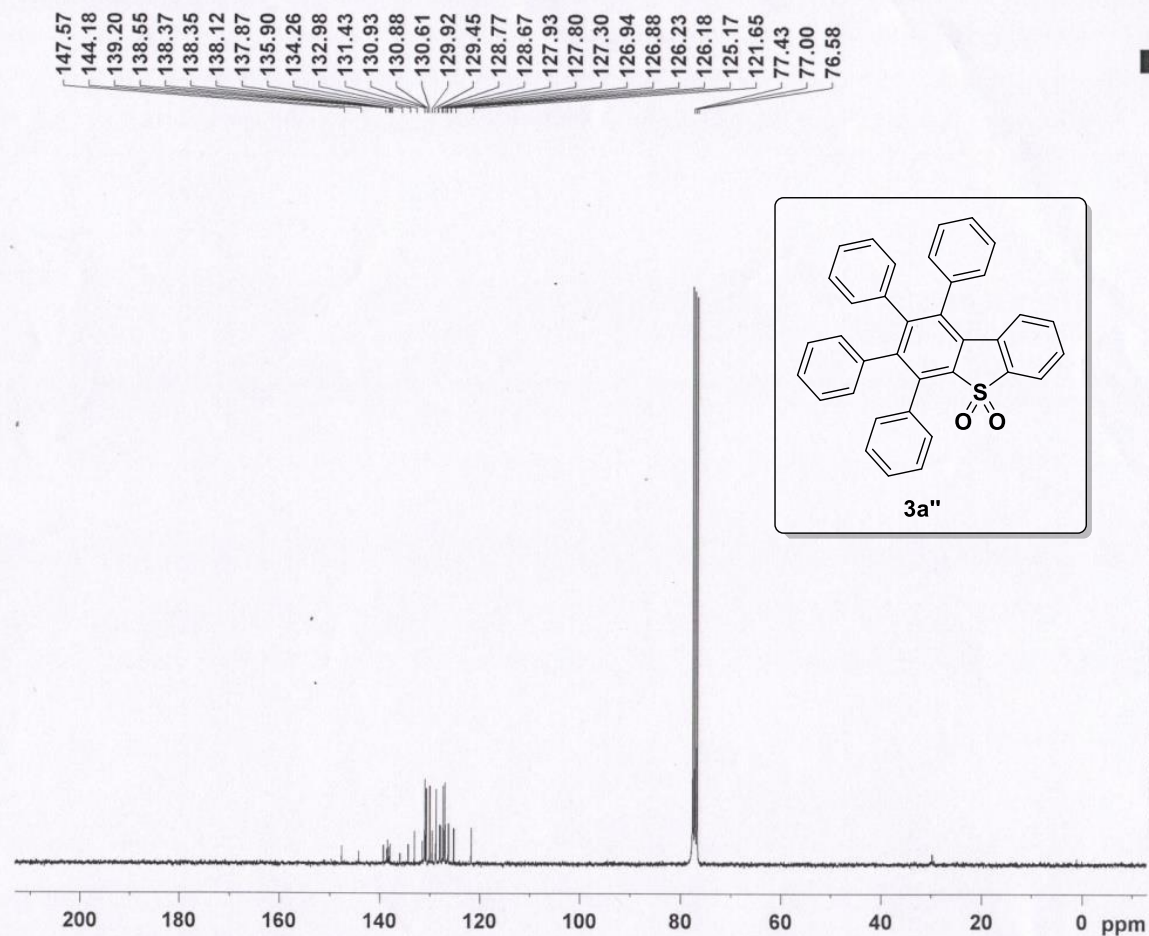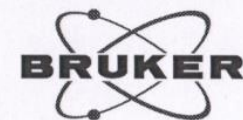

NAME PM-A-146  
 EXPNO 4  
 PROCNO 1  
 Date\_ 20190722  
 Time 9.26  
 INSTRUM spect  
 PROBHD 5 mm DUL 13C-1  
 PULPROG zgpg30  
 TD 65536  
 SOLVENT  $\text{CDCl}_3$   
 NS 9000  
 DS 4  
 SWH 17985.611 Hz  
 FIDRES 0.274439 Hz  
 AQ 1.8219508 sec  
 RG 2896.3  
 DW 27.800 usec  
 DE 6.50 usec  
 TE 300.0 K  
 D1 2.00000000 sec  
 D11 0.03000000 sec  
 TD0 1

===== CHANNEL f1 =====  
 NUC1  $^{13}\text{C}$   
 P1 10.68 usec  
 PL1 0.00 dB  
 PL1W 31.39858055 W  
 SFO1 75.4752953 MHz

===== CHANNEL f2 =====  
 CPDPRG2 waltz16  
 NUC2  $^1\text{H}$   
 PCPD2 80.00 usec  
 PL2 -1.00 dB  
 PL12 15.48 dB  
 PL13 16.00 dB  
 PL2W 13.28156662 W  
 PL12W 0.29870972 W  
 PL13W 0.26500207 W  
 SFO2 300.1312005 MHz  
 SI 32768  
 SF 75.4677437 MHz  
 WDW EM  
 SSB 0  
 LB 1.00 Hz  
 GB 0  
 PC 1.40

$^{13}\text{C}$  NMR (75 MHz,  $\text{CDCl}_3$ ) spectrum of compound **3a''**

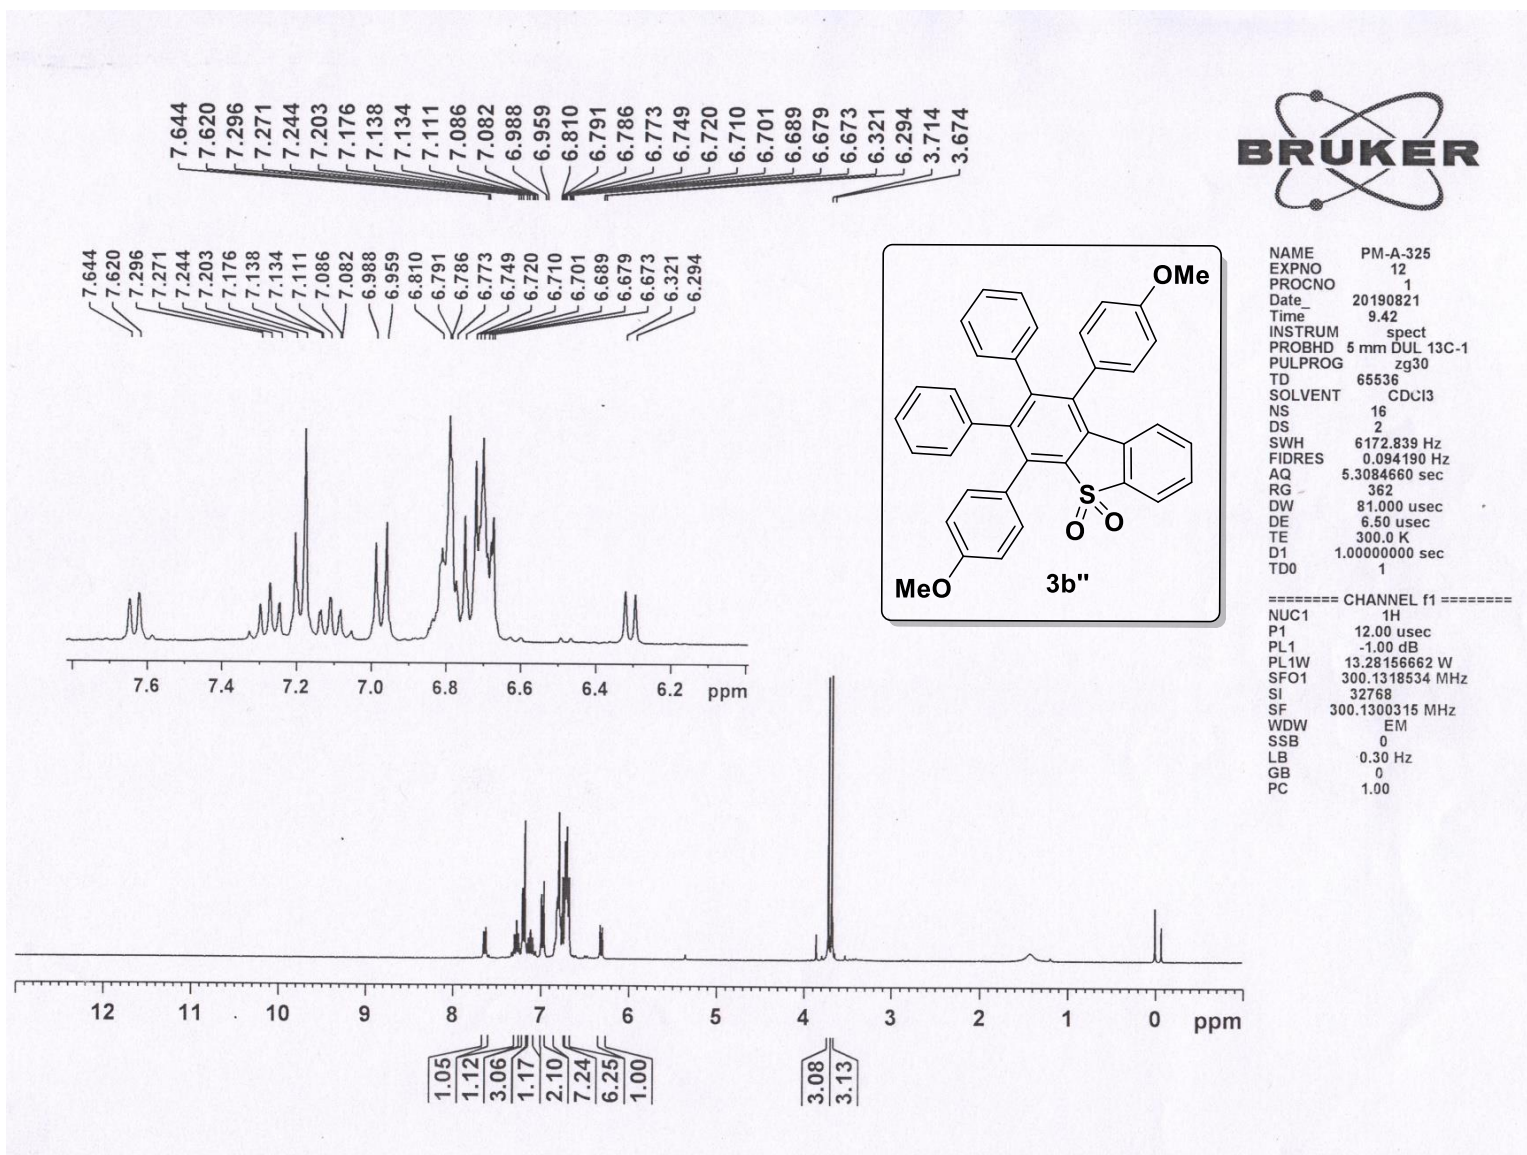

<sup>1</sup>H-NMR (300 MHz, CDCl<sub>3</sub>) spectrum of compound **3b''**



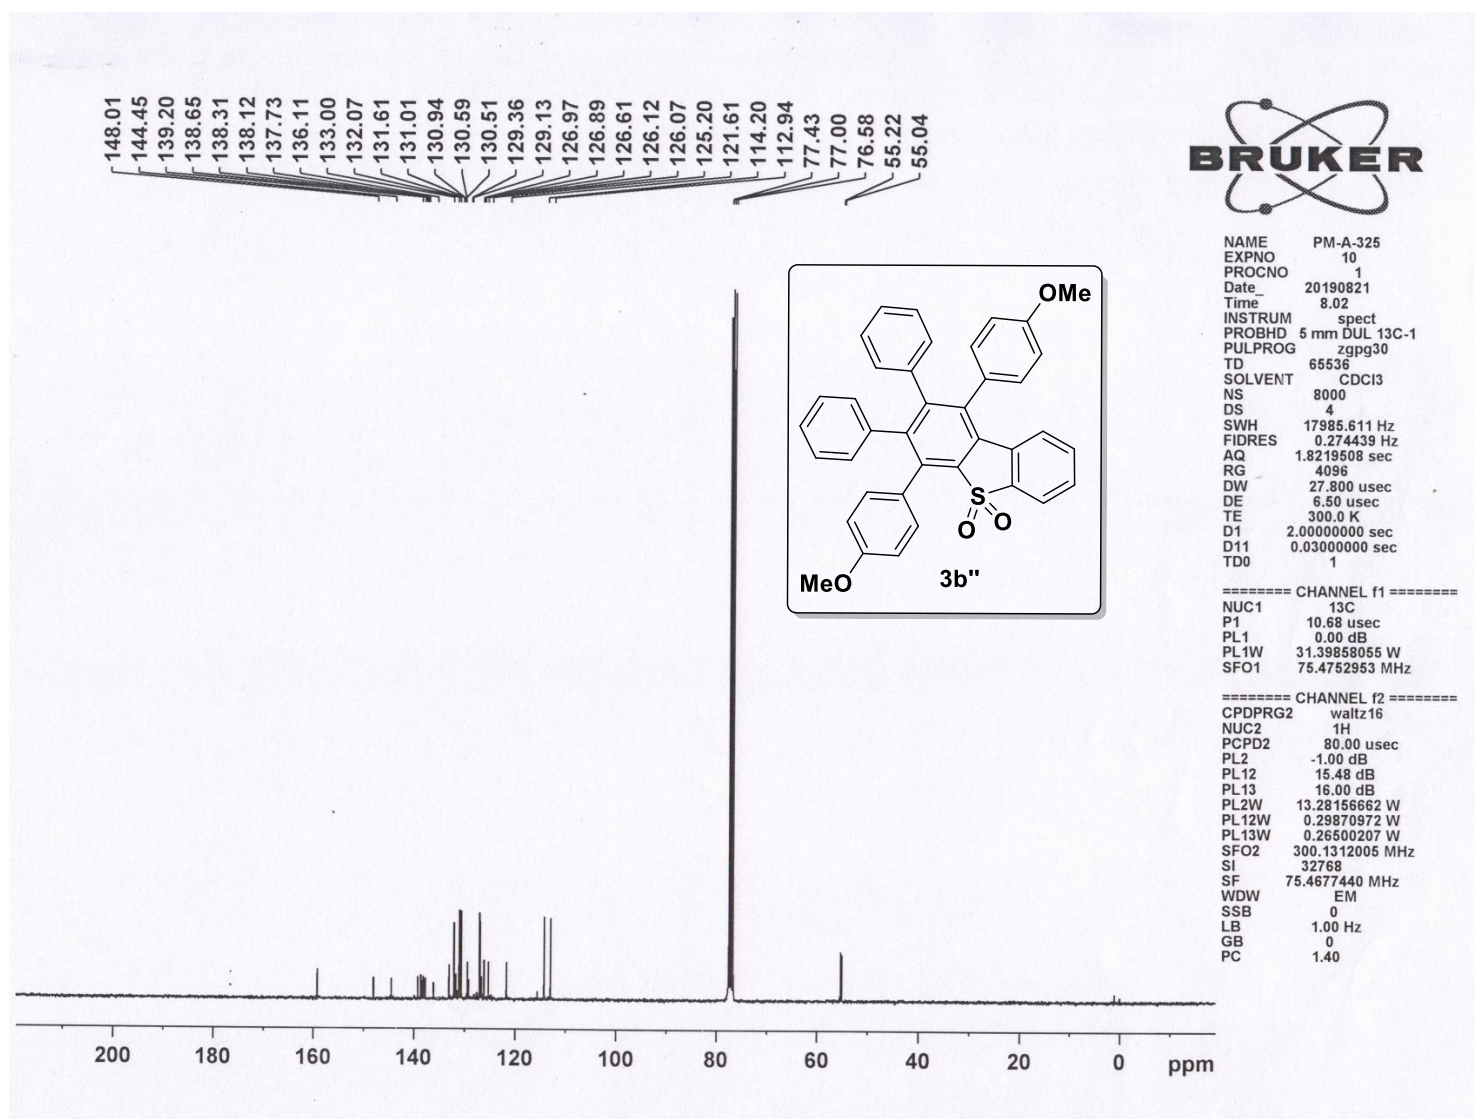

<sup>13</sup>C-NMR (75 MHz, CDCl<sub>3</sub>) spectrum of compound **3b''**

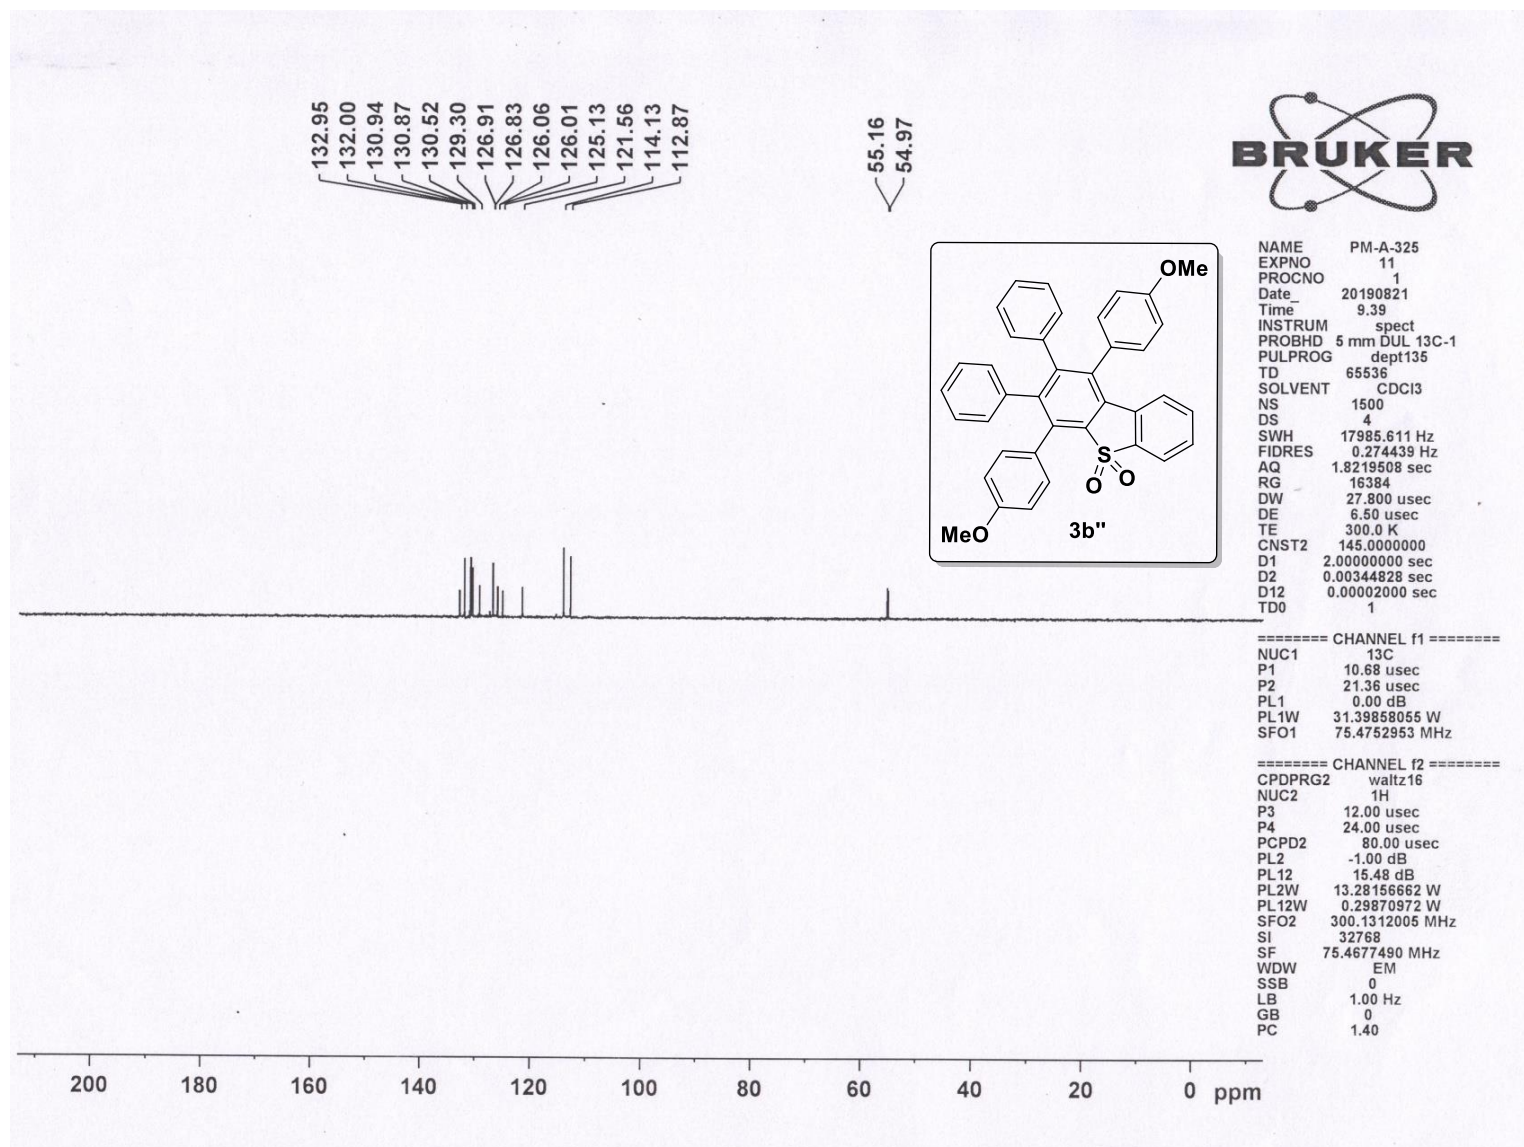

DEPT-135 NMR (75 MHz, CDCl<sub>3</sub>) spectrum of compound **3b''**



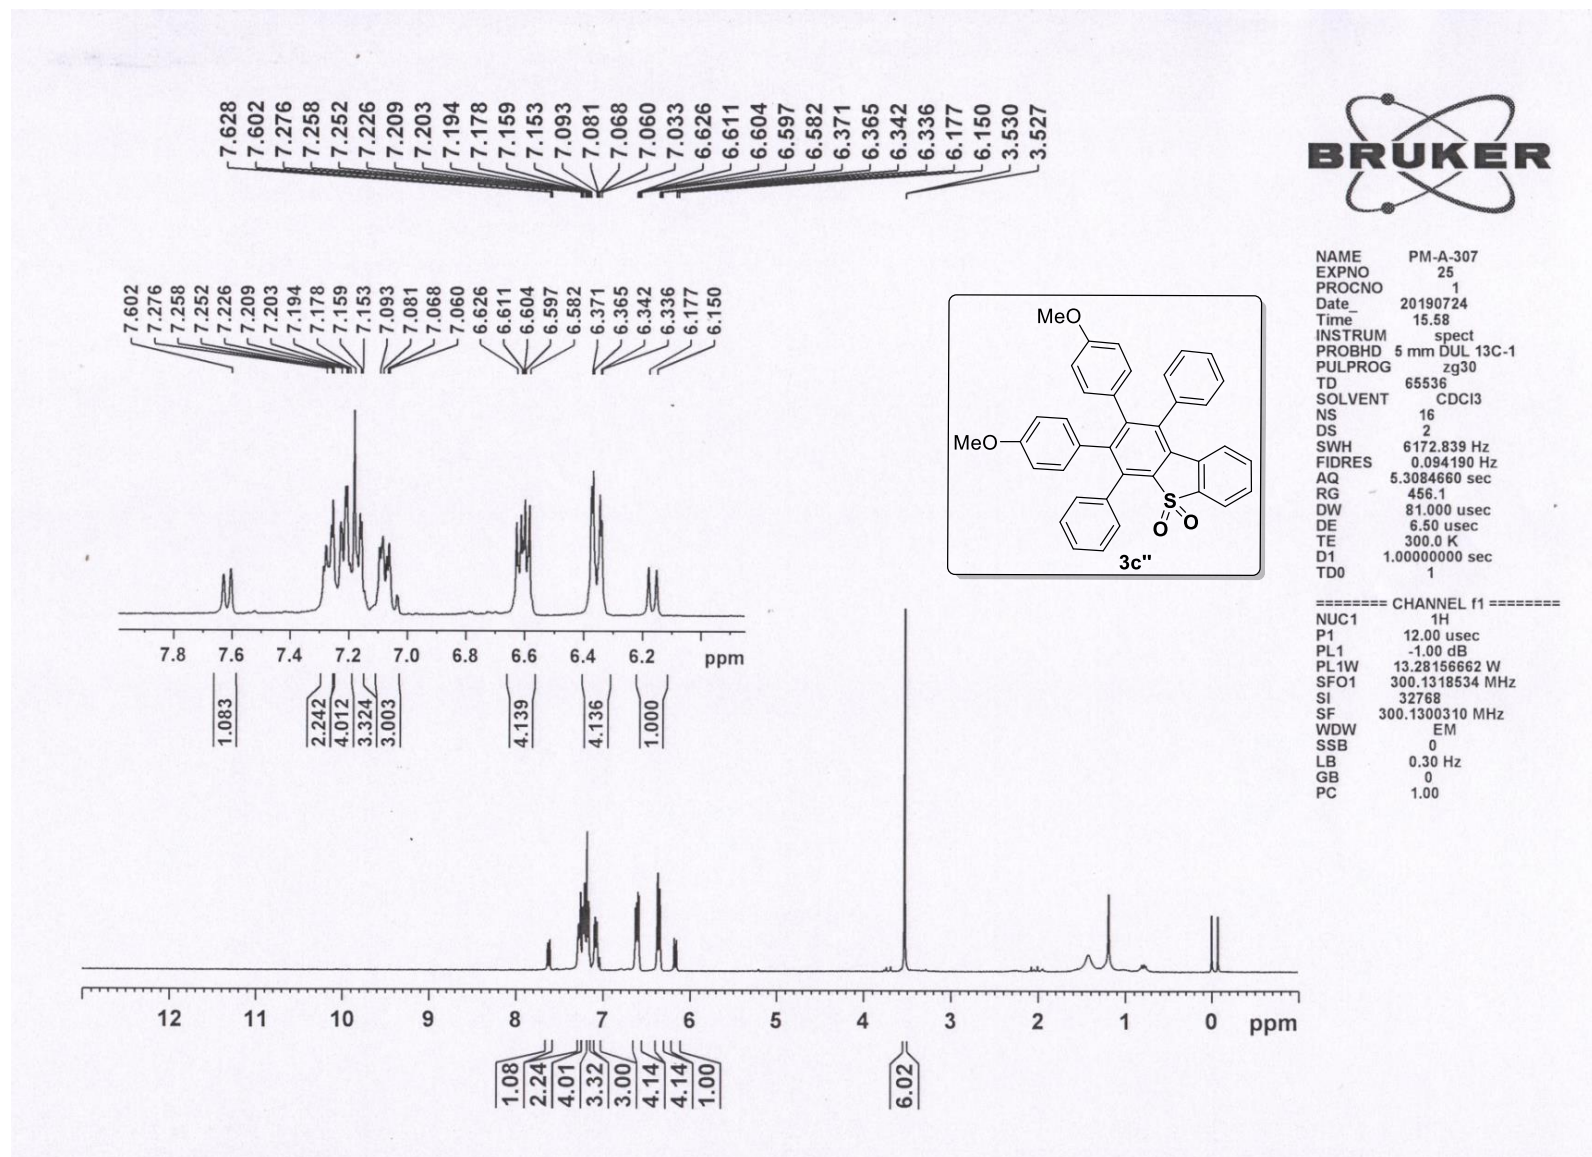

<sup>1</sup>H-NMR (300 MHz, CDCl<sub>3</sub>) spectrum of compound **3c''**

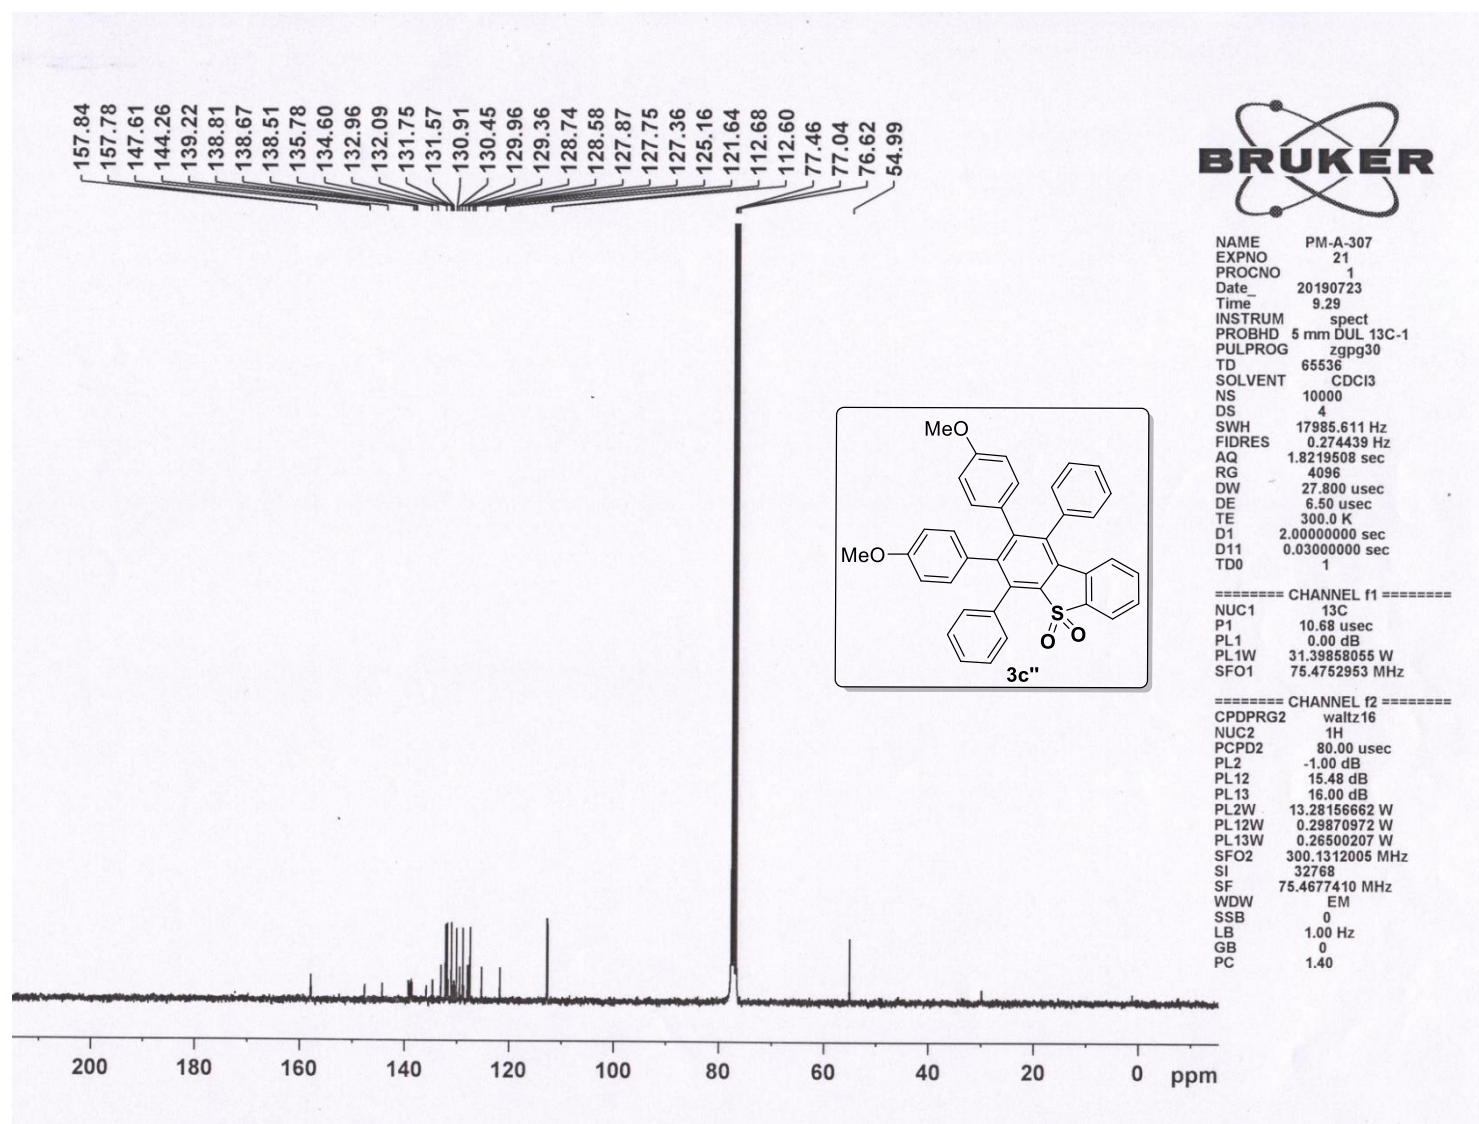

<sup>13</sup>C-NMR (75 MHz, CDCl<sub>3</sub>) spectrum of compound 3c''

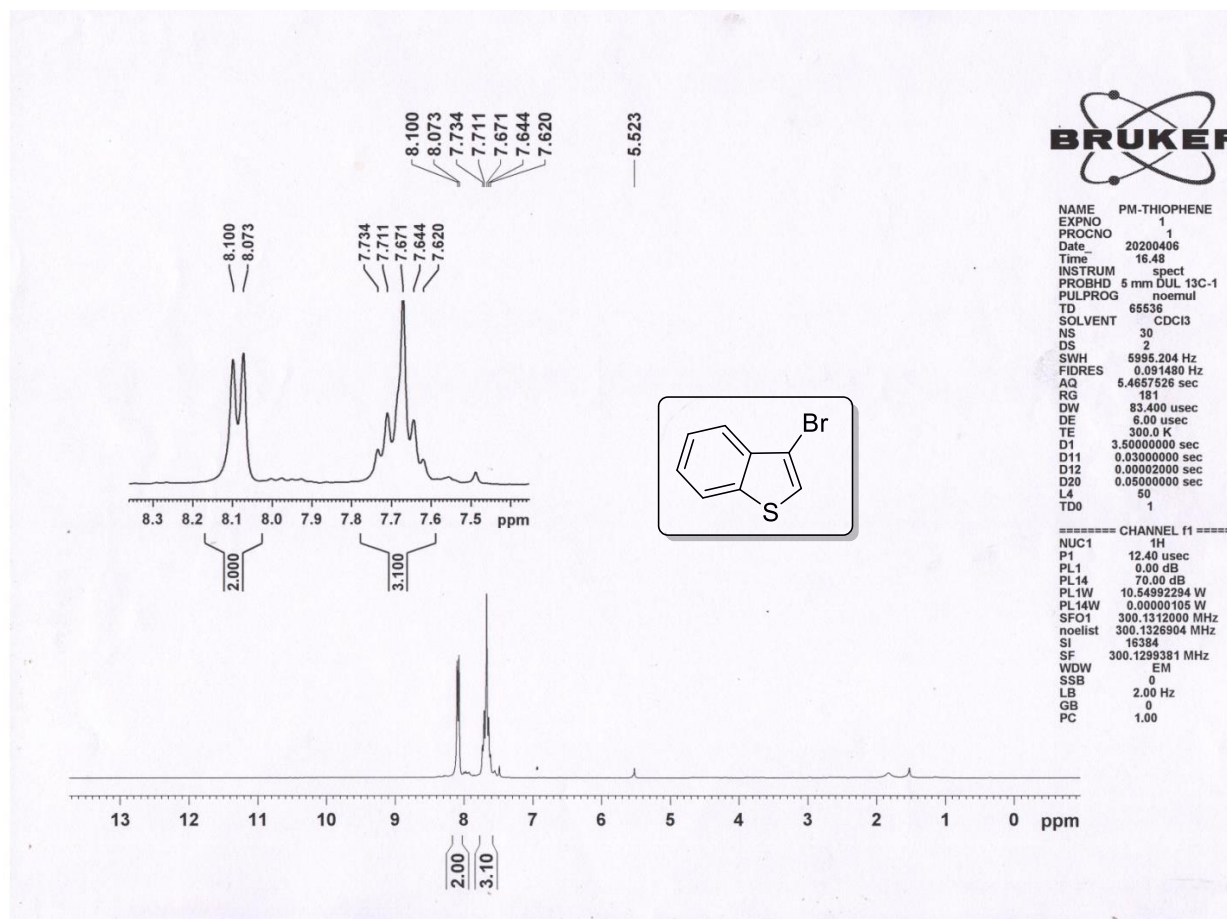

$^1\text{H}$ -NMR (300 MHz,  $\text{CDCl}_3$ ) spectrum of 3-bromobenzothiophene





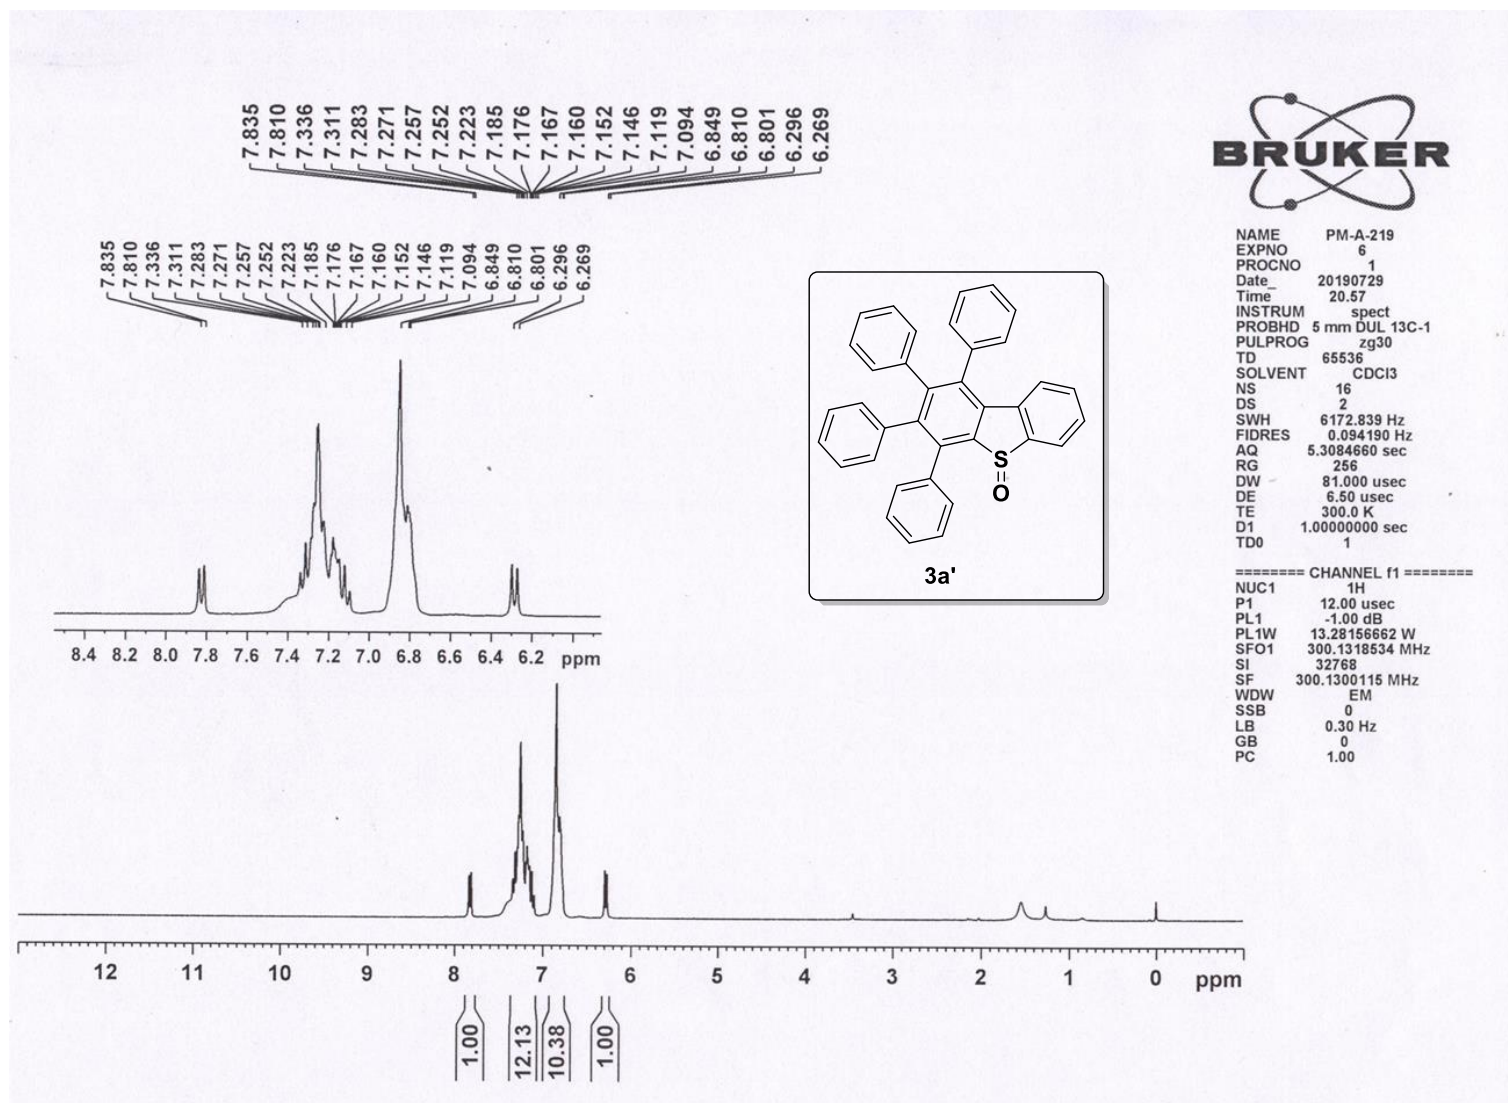

$^1\text{H}$  NMR (300 MHz,  $\text{CDCl}_3$ ) spectrum of compound **3a'**

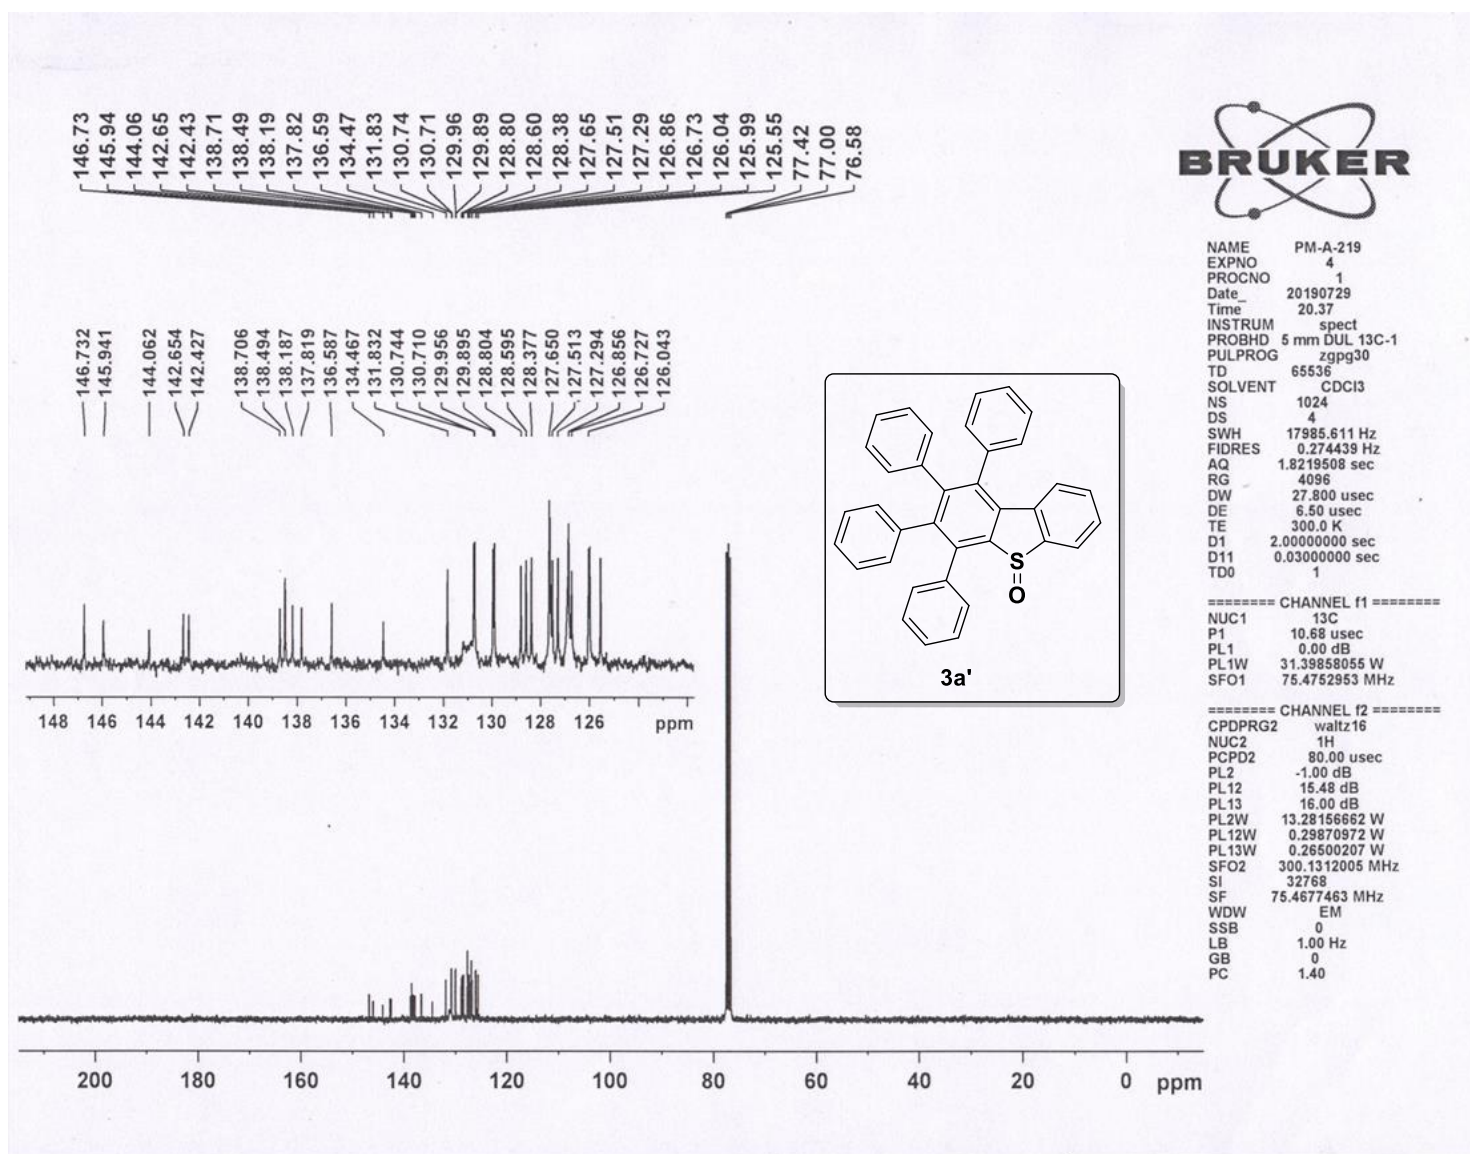

$^{13}\text{C}$  NMR (75 MHz,  $\text{CDCl}_3$ ) spectrum of compound **3a'**

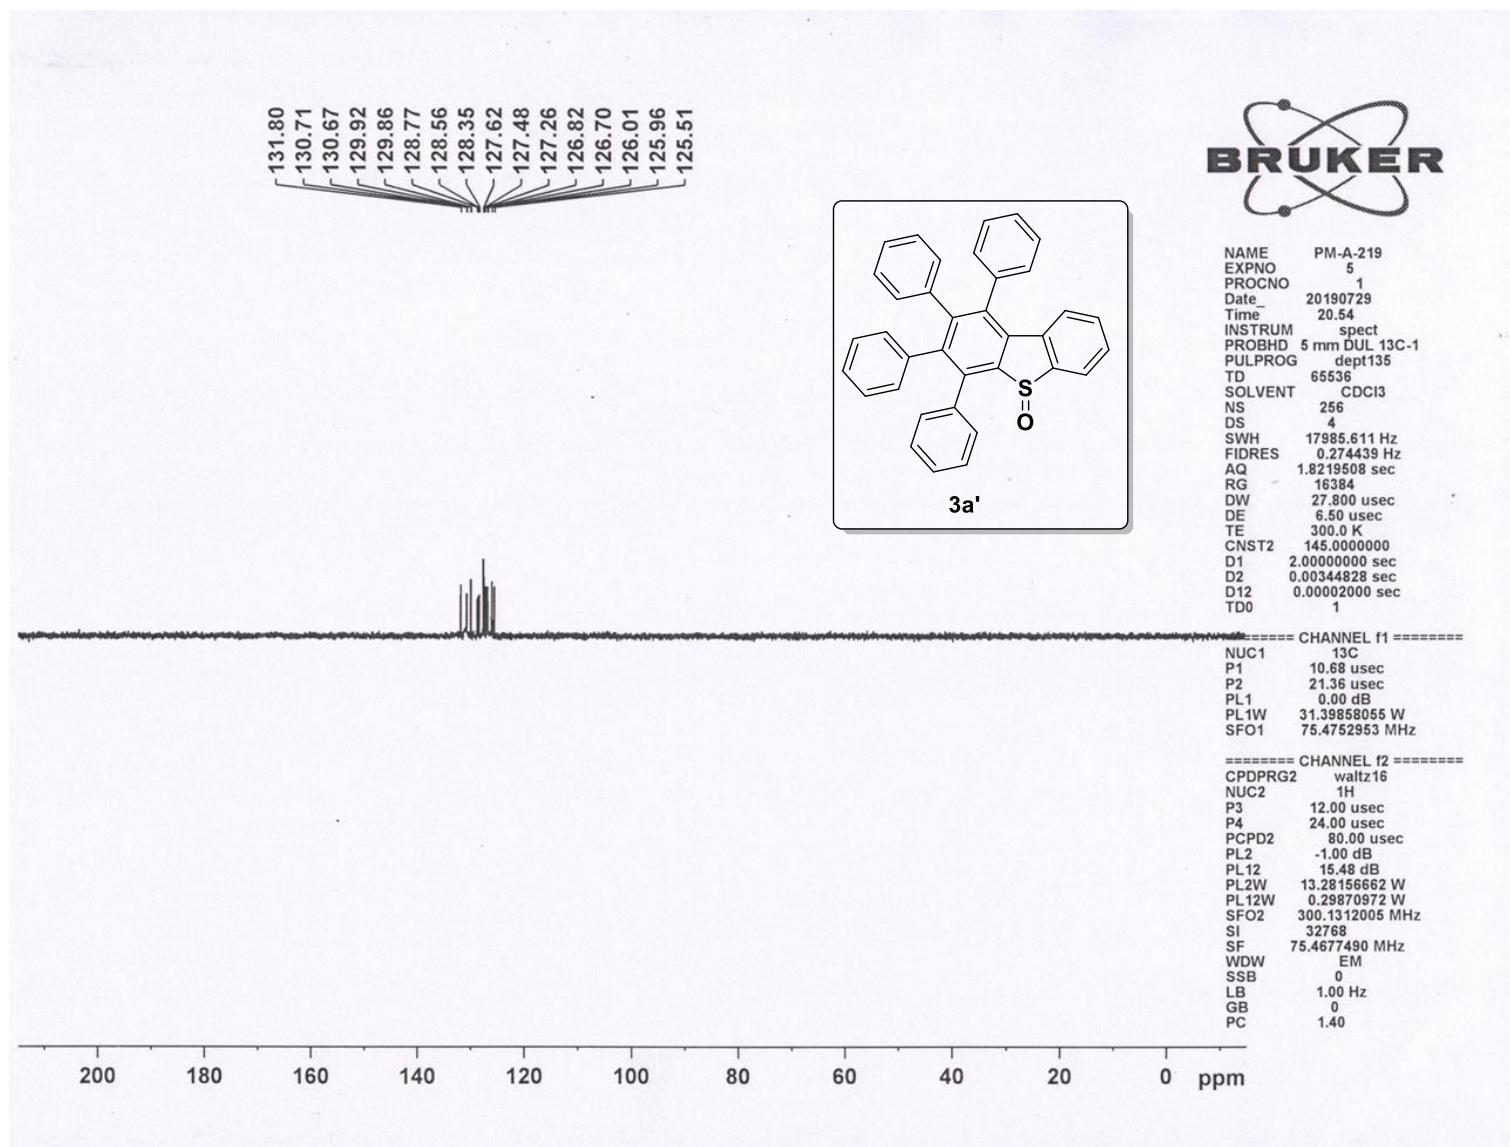

DEPT-135 (75 MHz, CDCl<sub>3</sub>) NMR spectrum of compound **3a'**



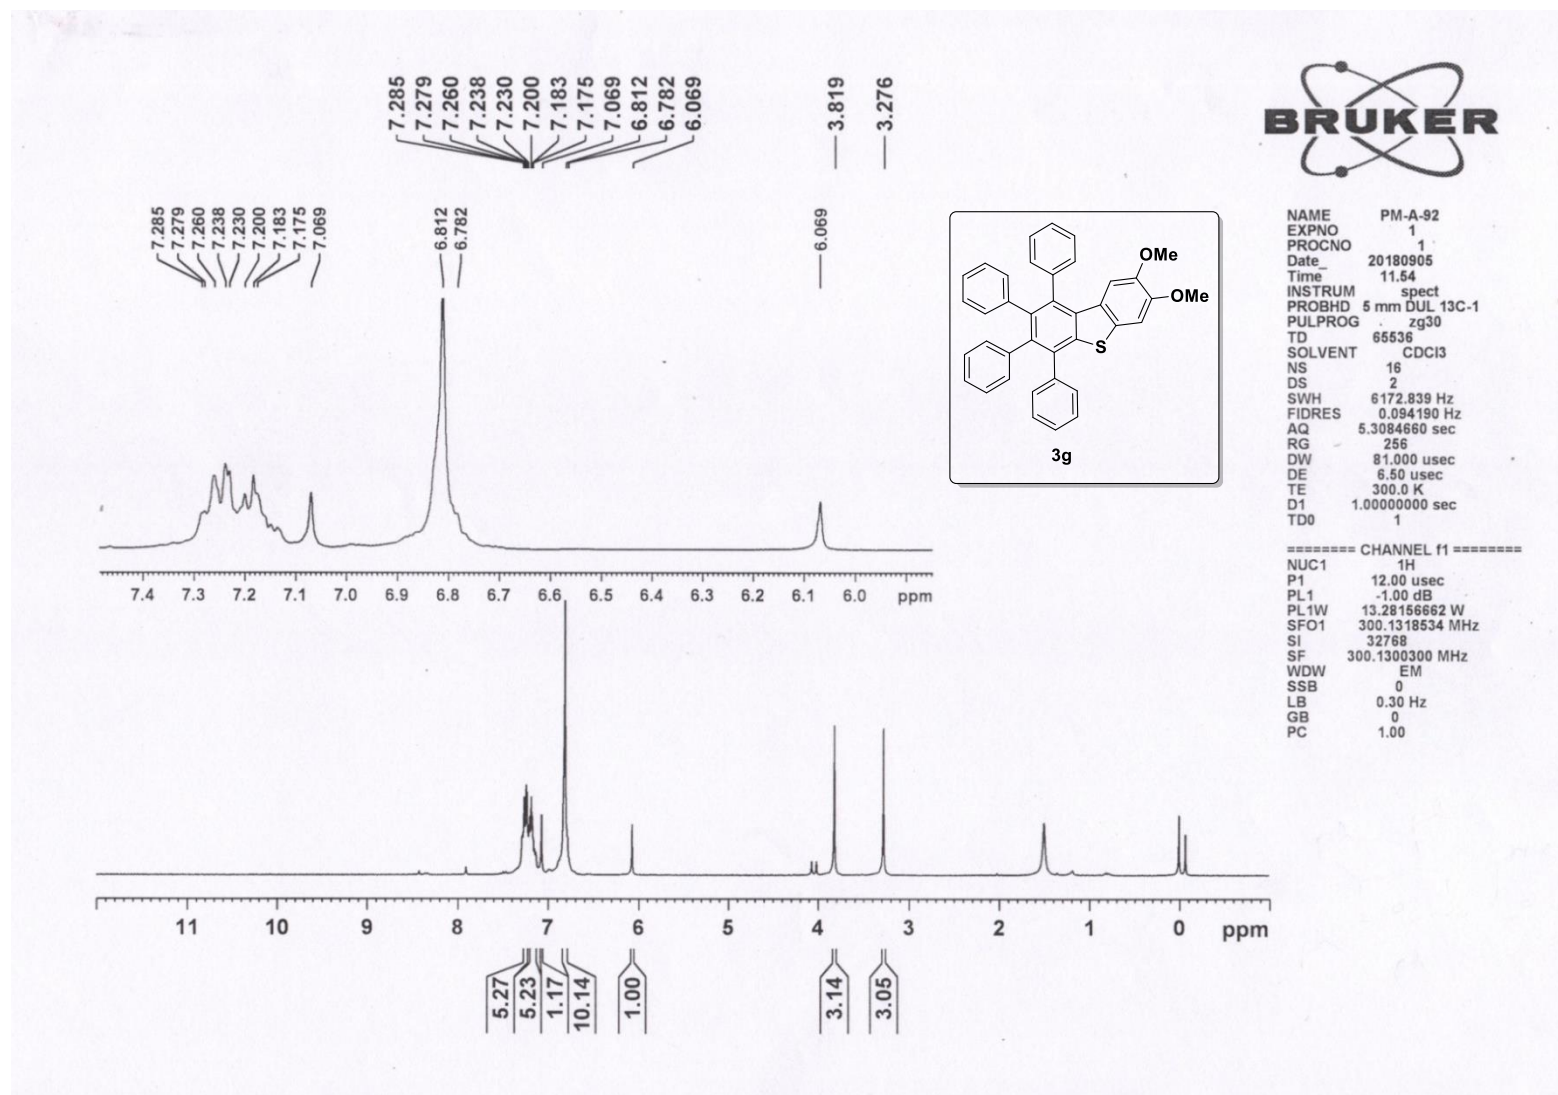

$^1\text{H}$ -NMR (300 MHz,  $\text{CDCl}_3$ ) spectrum of compound **3g**



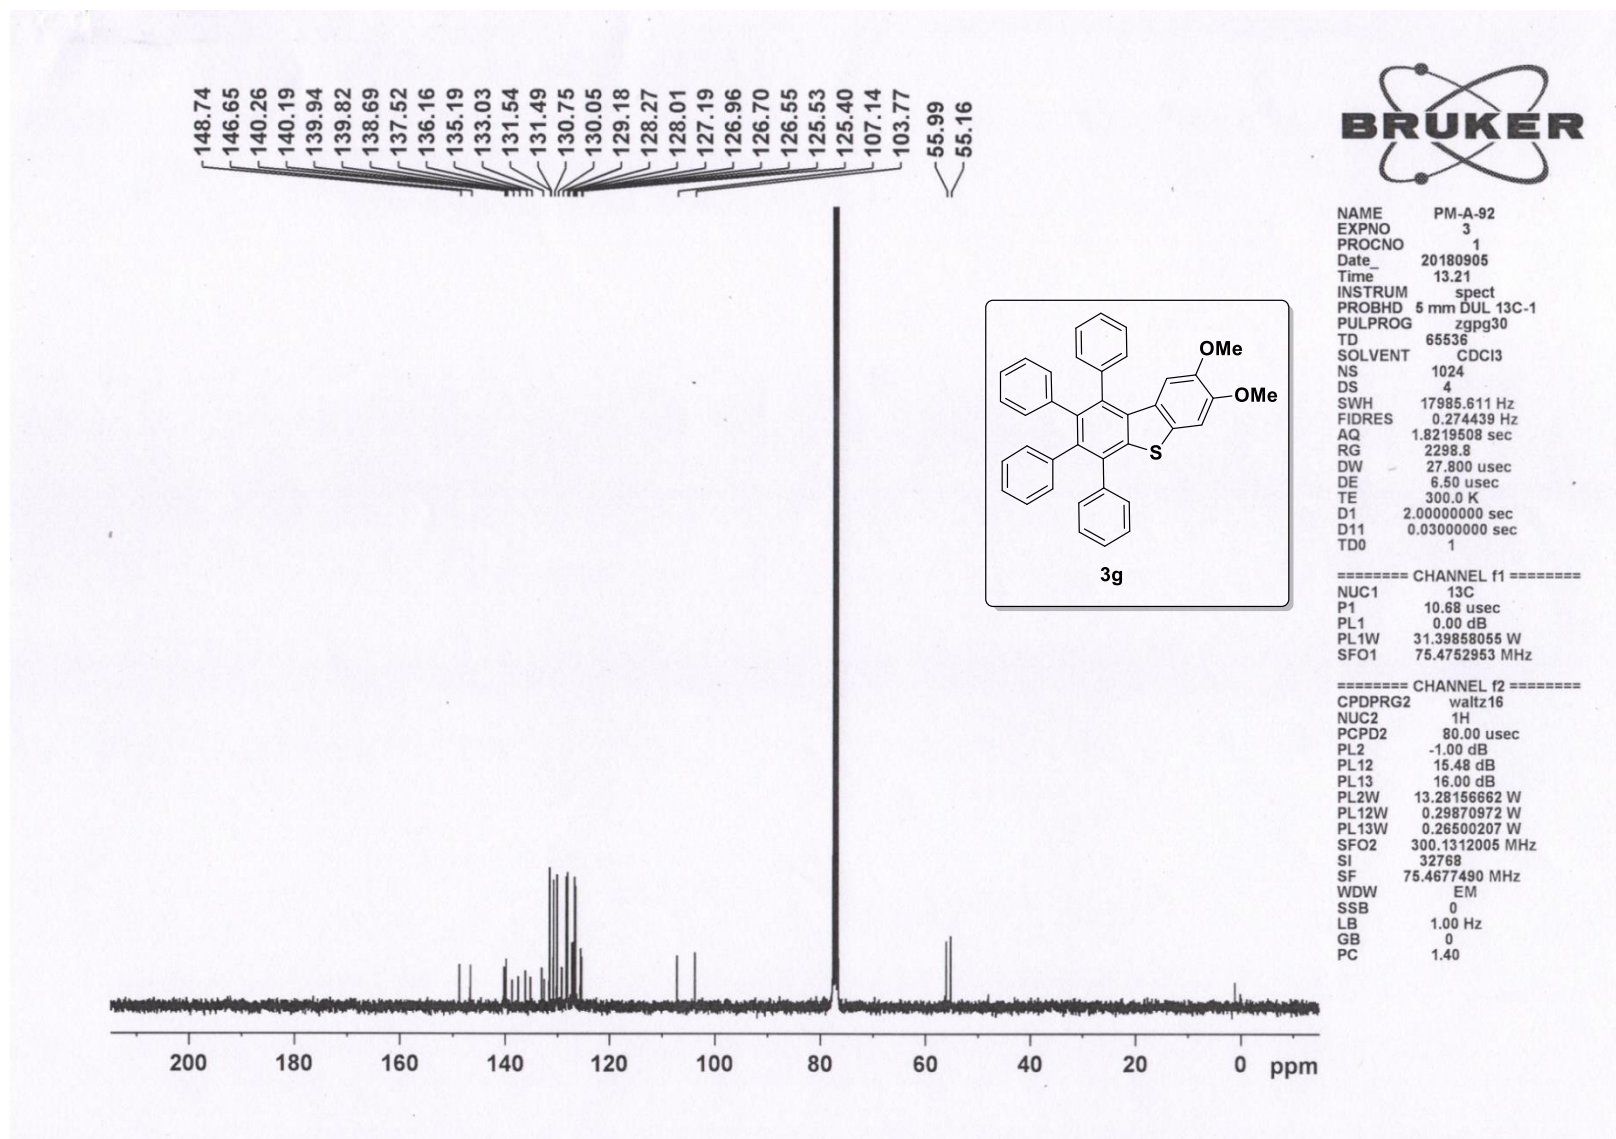

$^{13}\text{C}$ -NMR (75 MHz,  $\text{CDCl}_3$ ) spectrum of compound **3g**

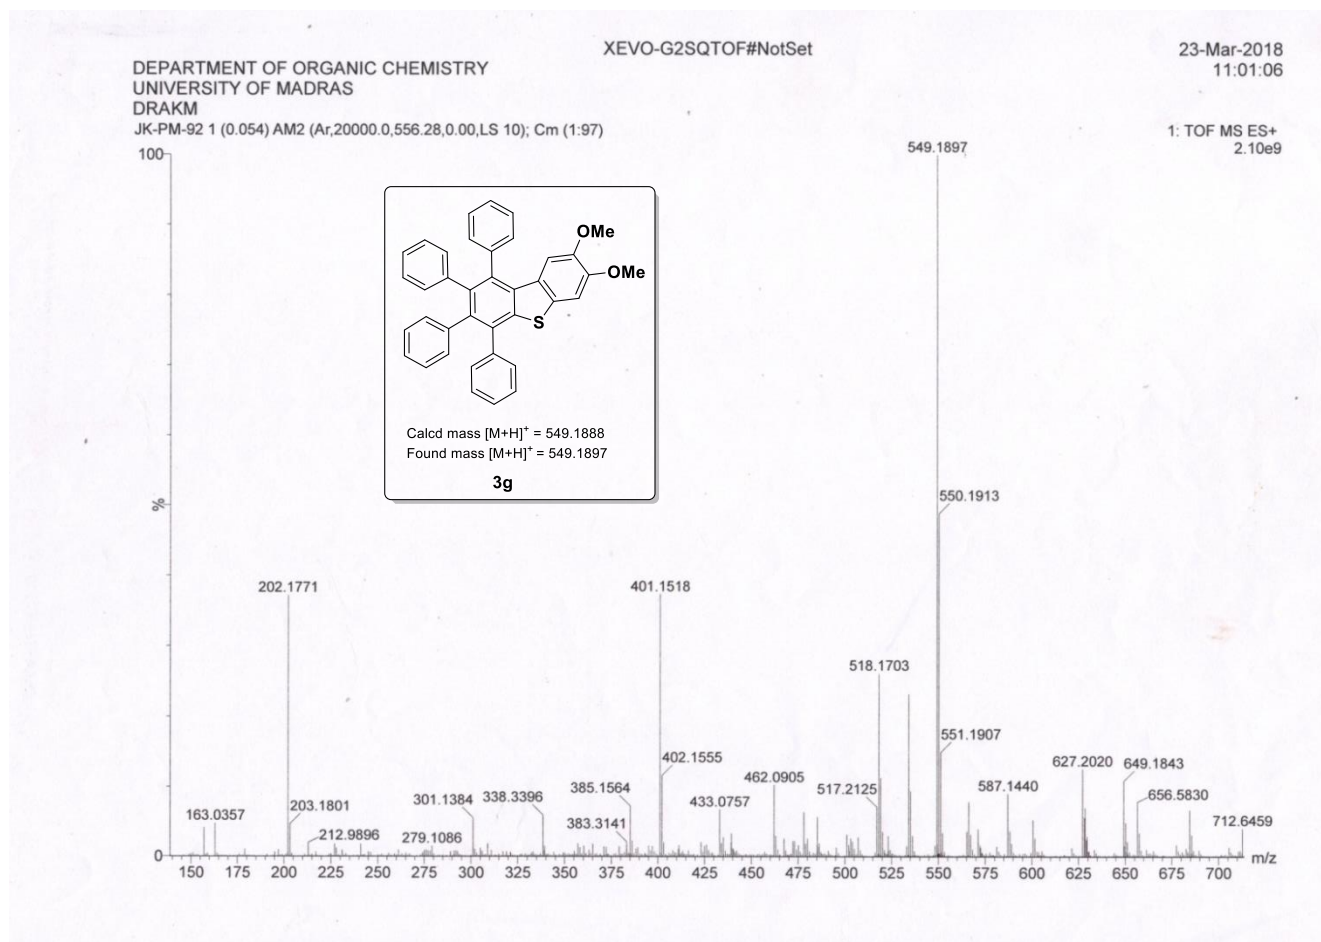

HRMS spectrum of compound **3g**

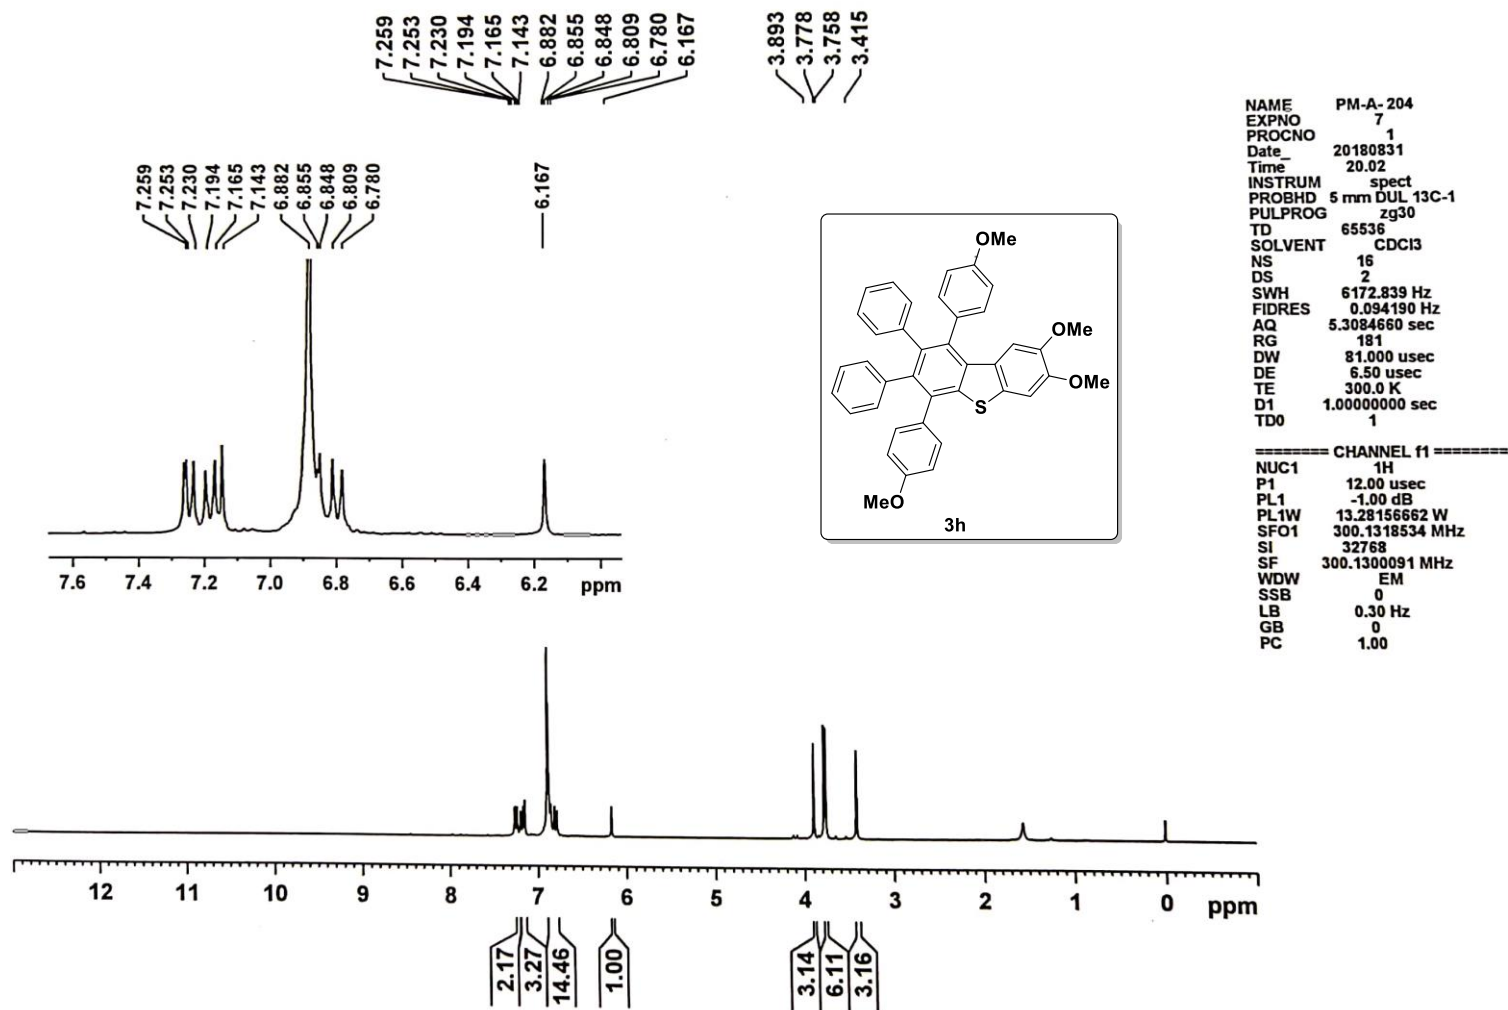

<sup>1</sup>H-NMR (300 MHz, CDCl<sub>3</sub>) spectrum of compound **3h**

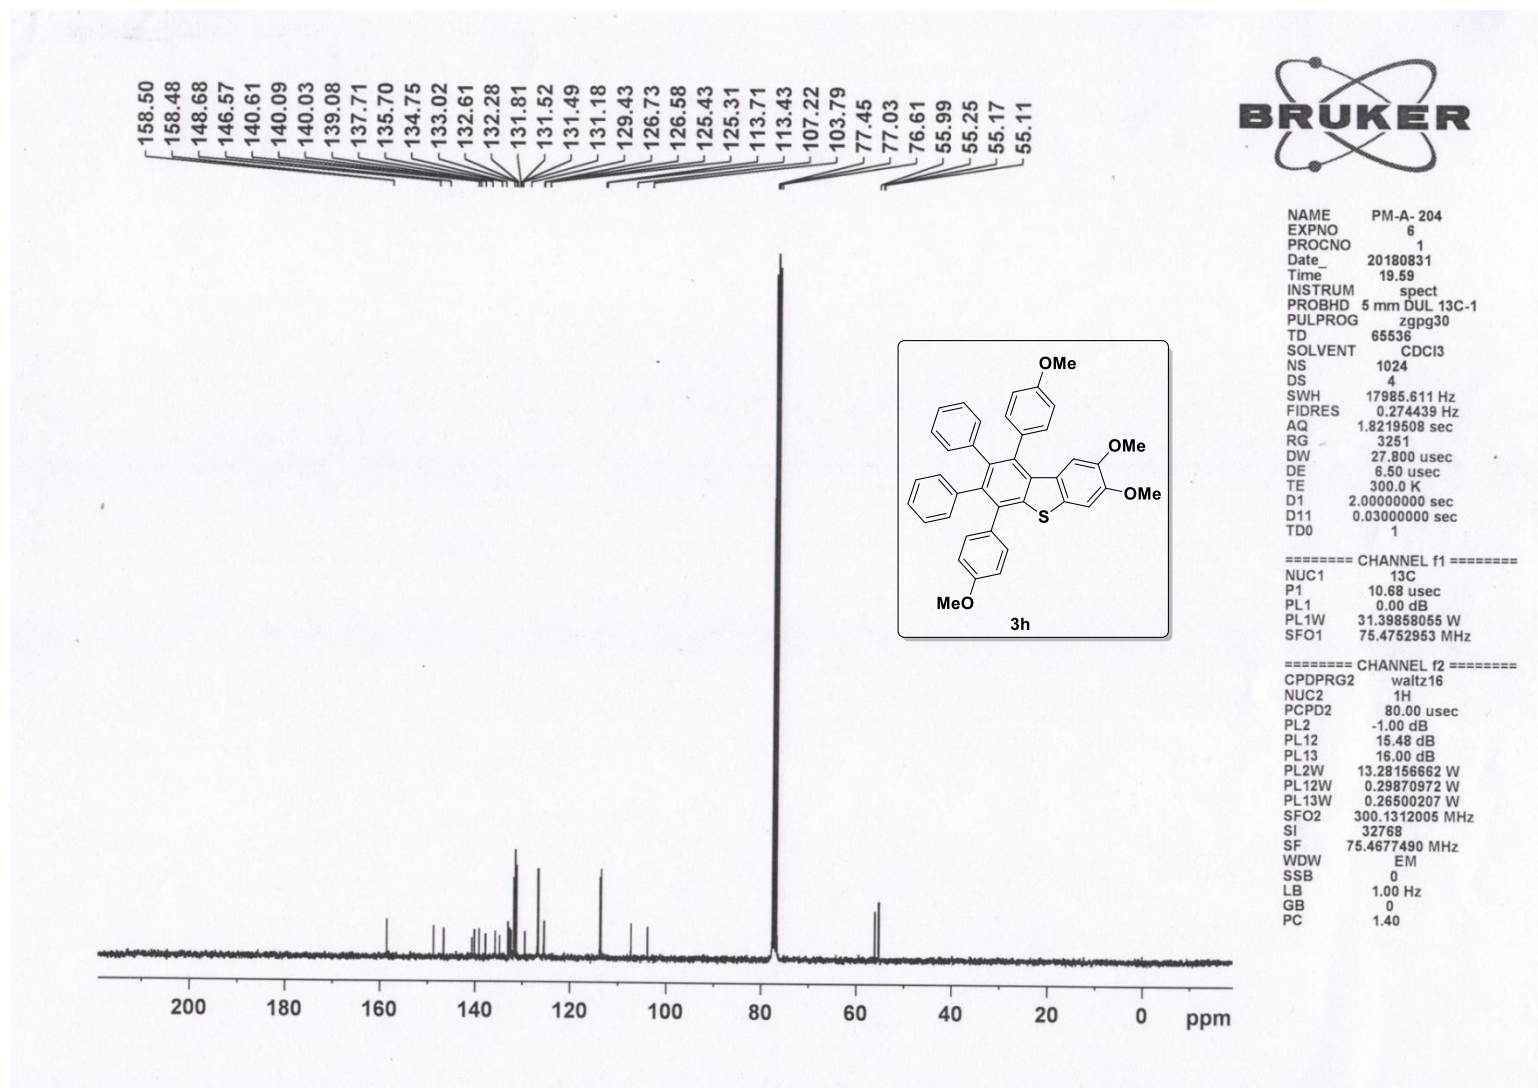

<sup>13</sup>C-NMR (75 MHz, CDCl<sub>3</sub>) spectrum of compound **3h**

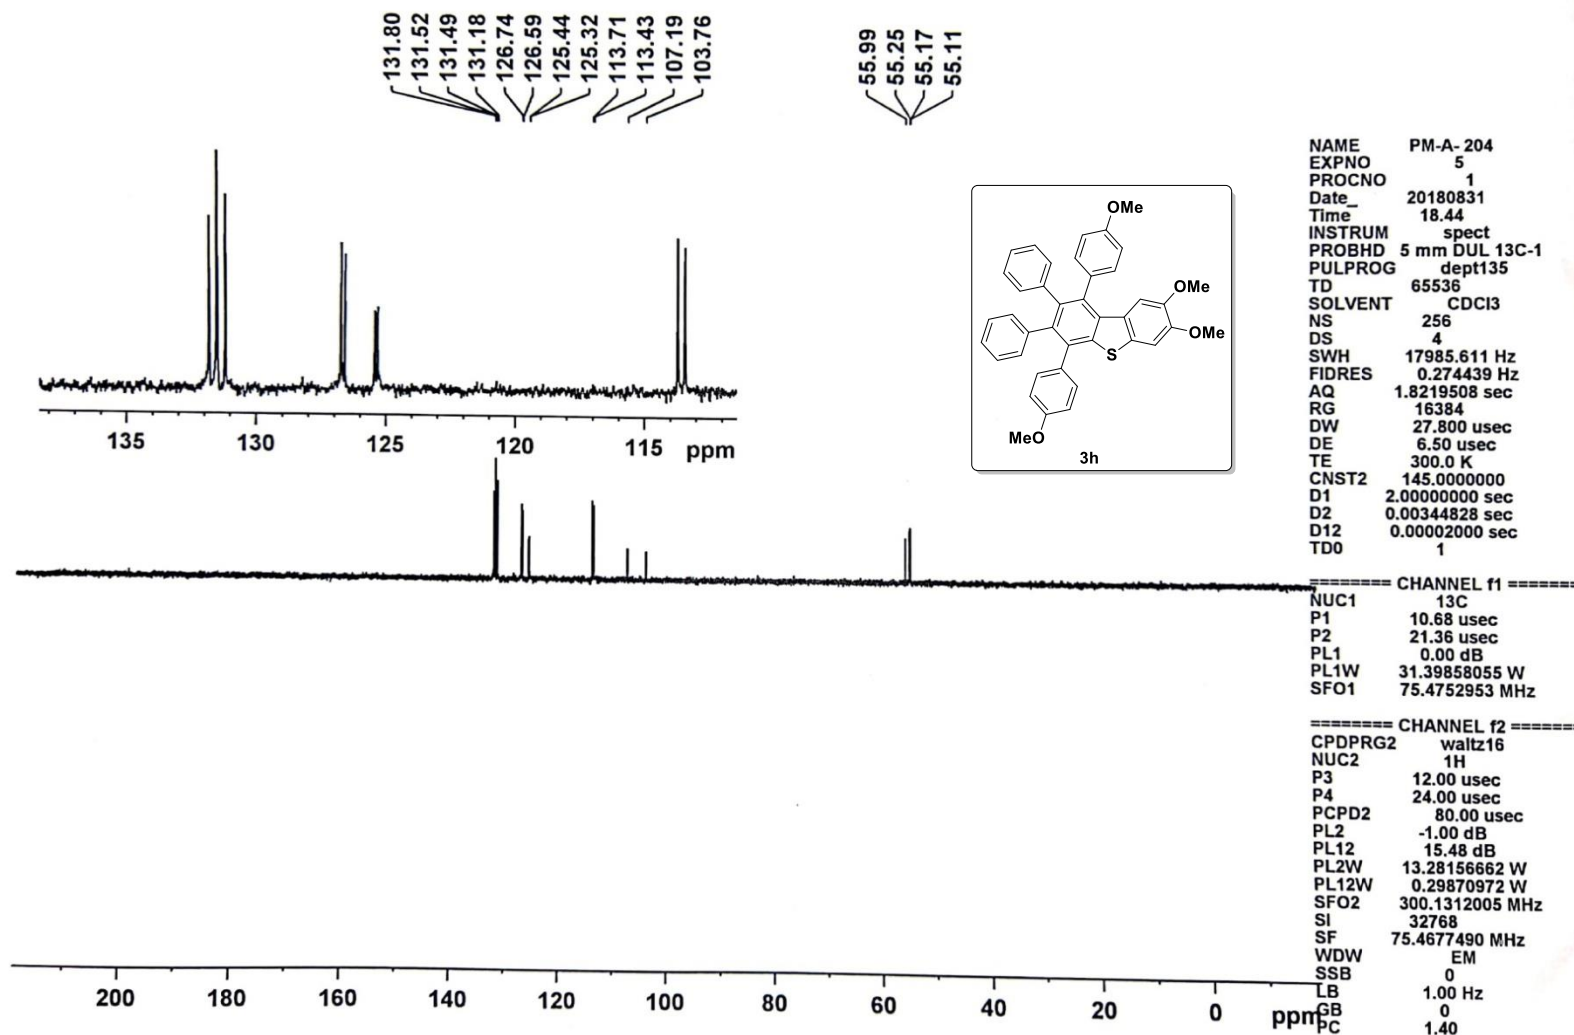

DEPT-135 (75 MHz, CDCl<sub>3</sub>) NMR spectrum of compound **3h**



spa50219  
VAK-Dm-192  
iitm\_PROTON-5to15 CDCl<sub>3</sub> /opt/topspin nmr 1

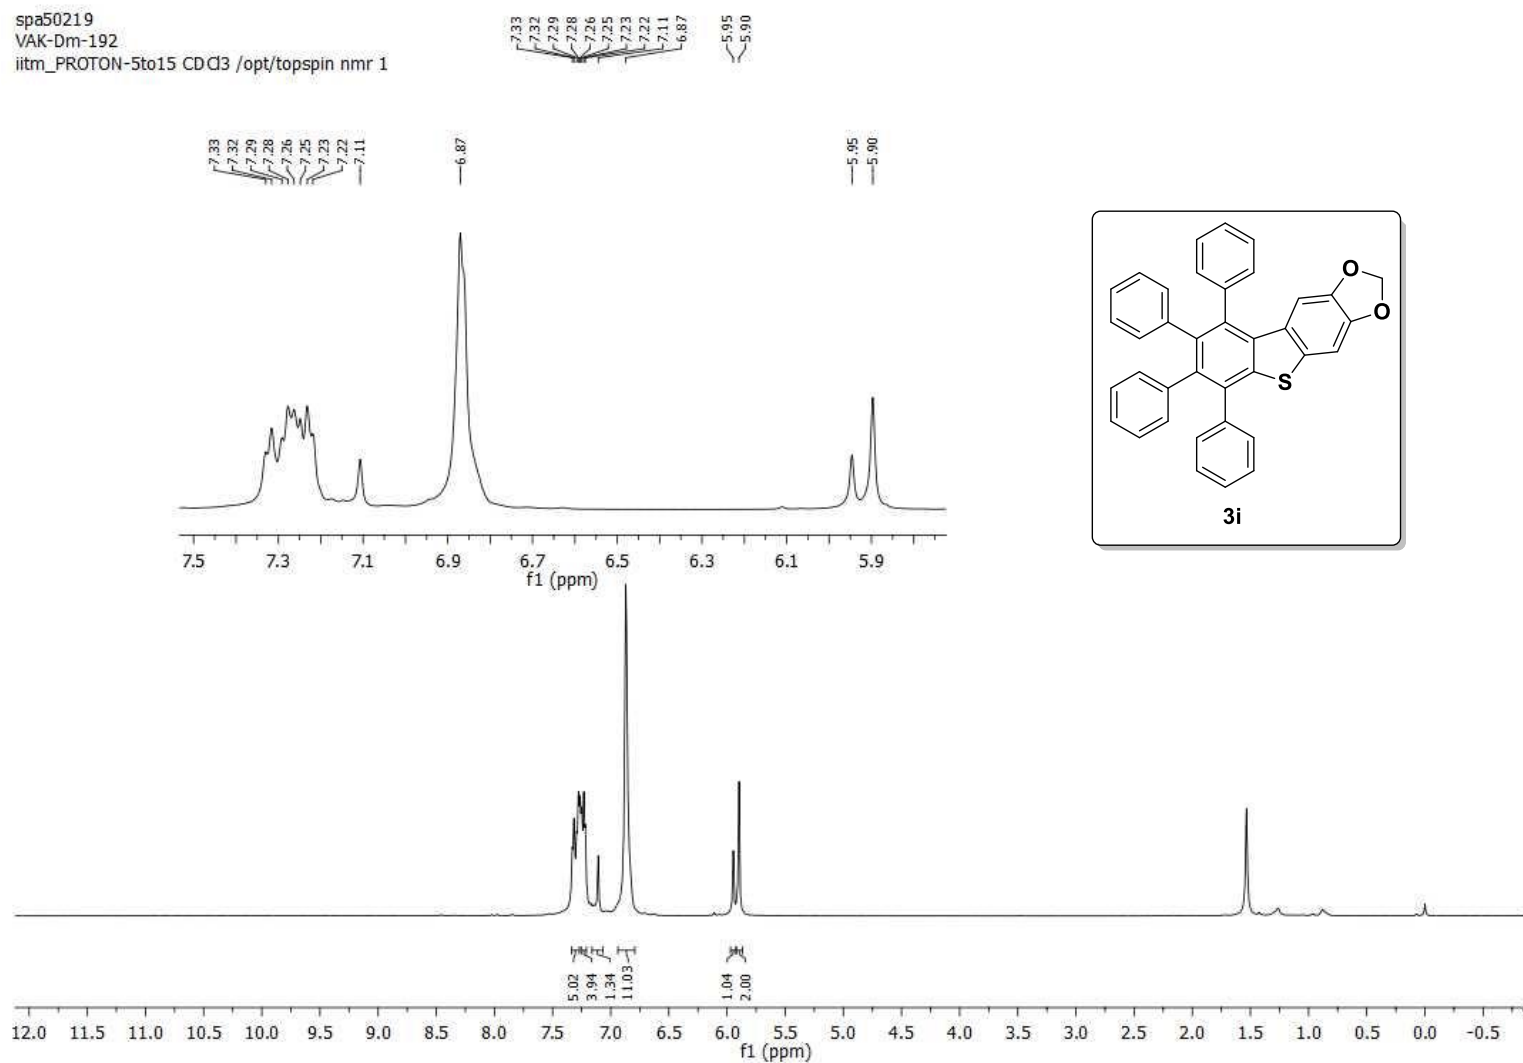

<sup>1</sup>H-NMR (400 MHz, CDCl<sub>3</sub>) spectrum of compound **3i**



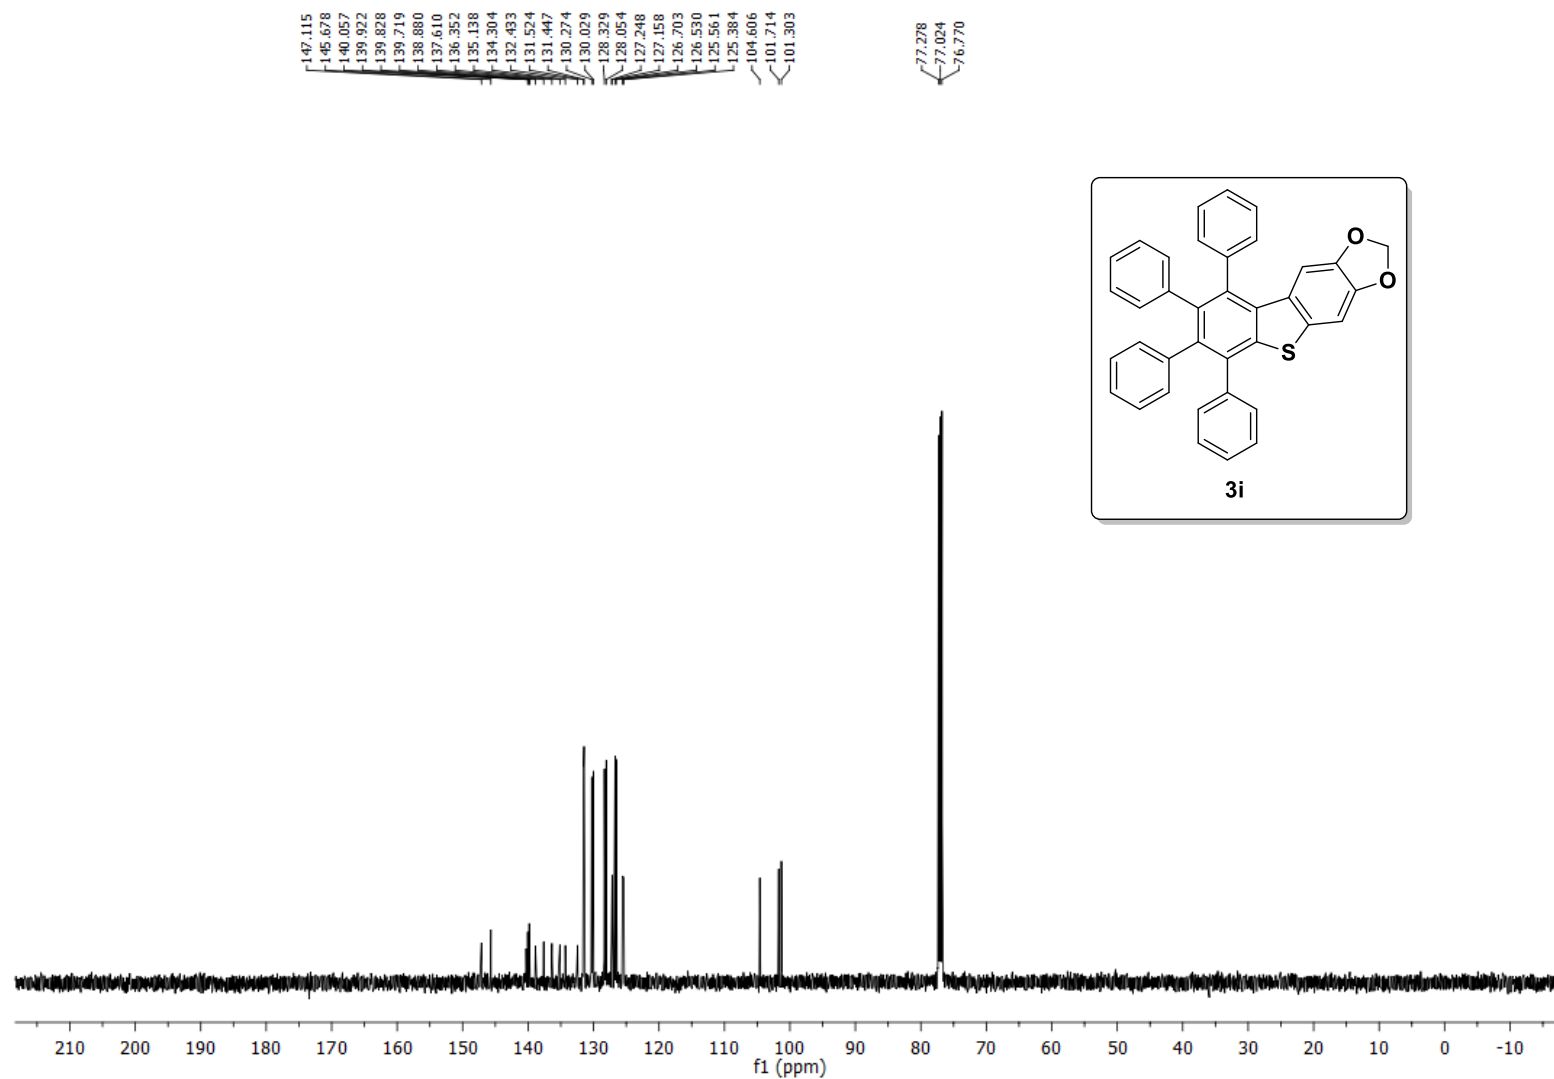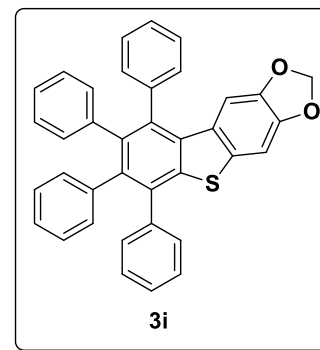

$^{13}\text{C}$ -NMR (100 MHz,  $\text{CDCl}_3$ ) spectrum of compound **3i**

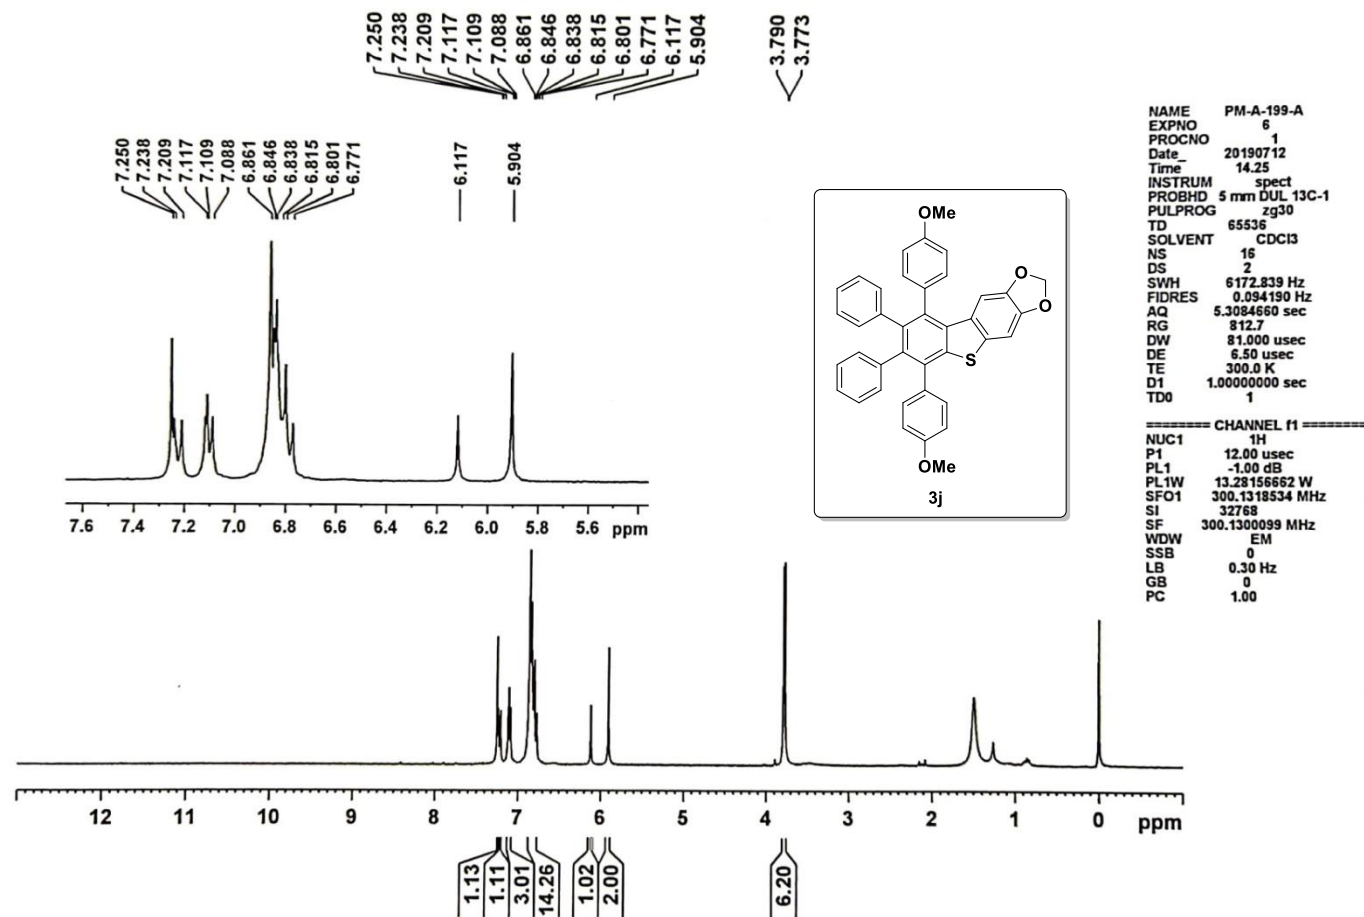

<sup>1</sup>H-NMR (300 MHz, CDCl<sub>3</sub>) spectrum of compound **3j**

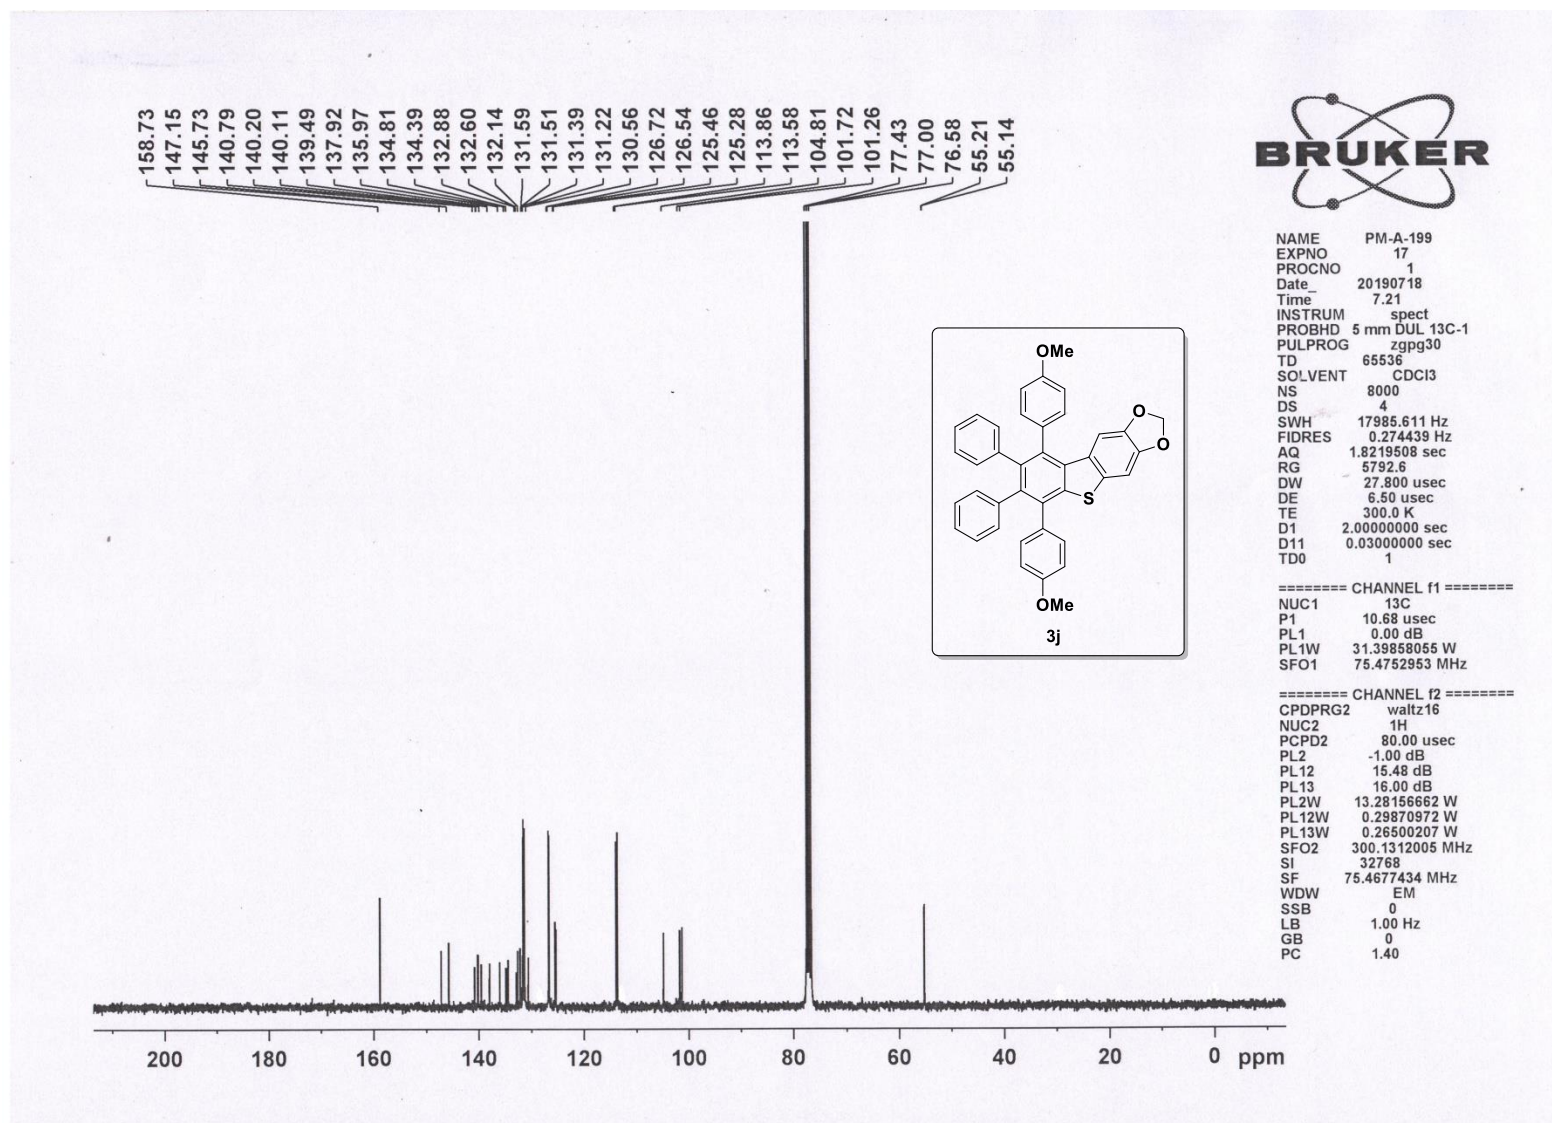

$^{13}\text{C}$ -NMR (75 MHz,  $\text{CDCl}_3$ ) spectrum of compound **3j**

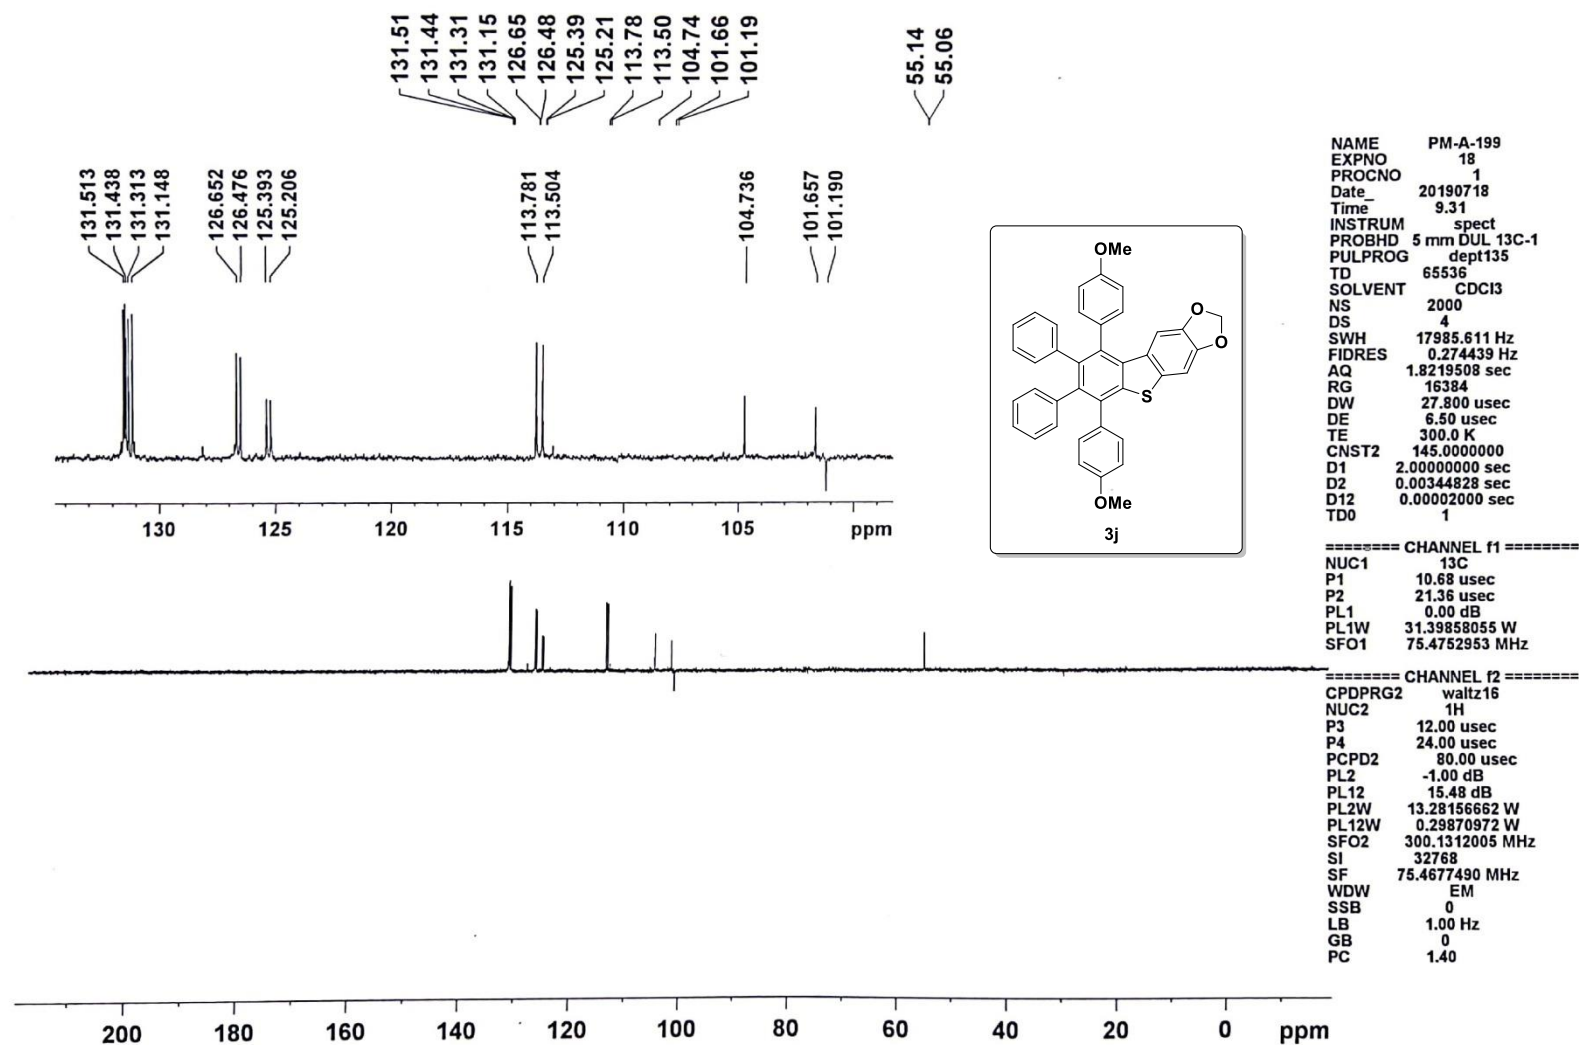

DEPT-135 NMR (75 MHz, CDCl<sub>3</sub>) spectrum of compound **3j**

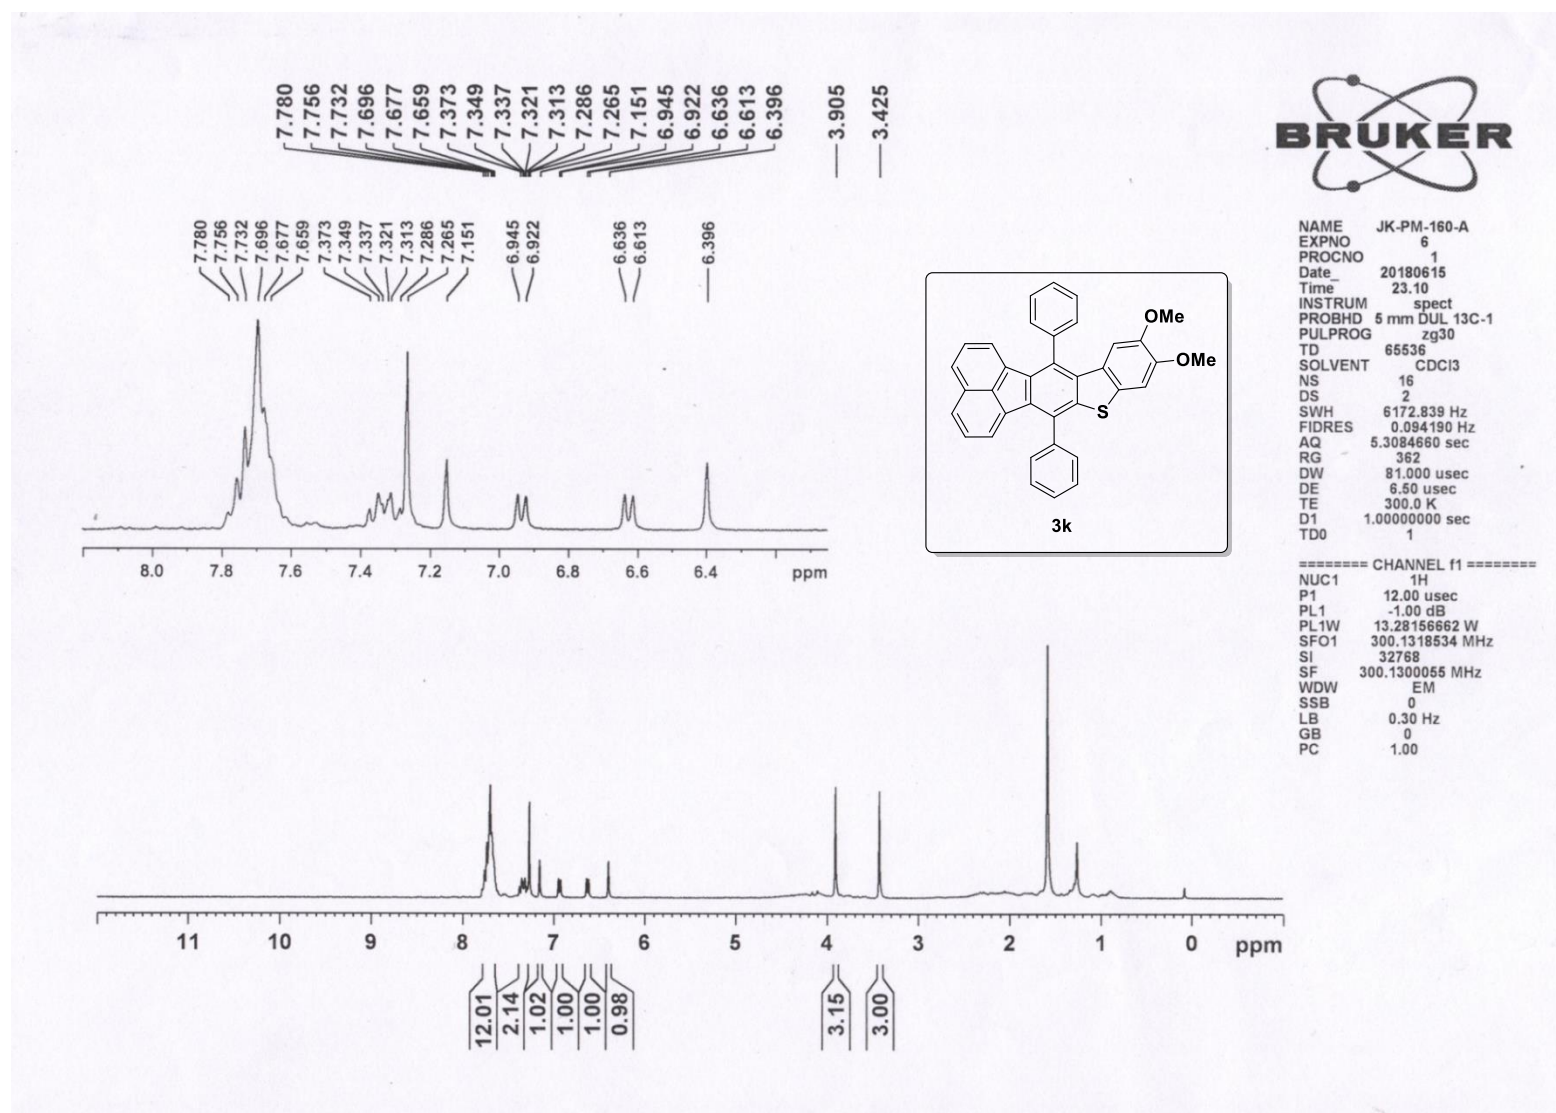

<sup>1</sup>H-NMR (300 MHz, CDCl<sub>3</sub>) spectrum of compound **3k**



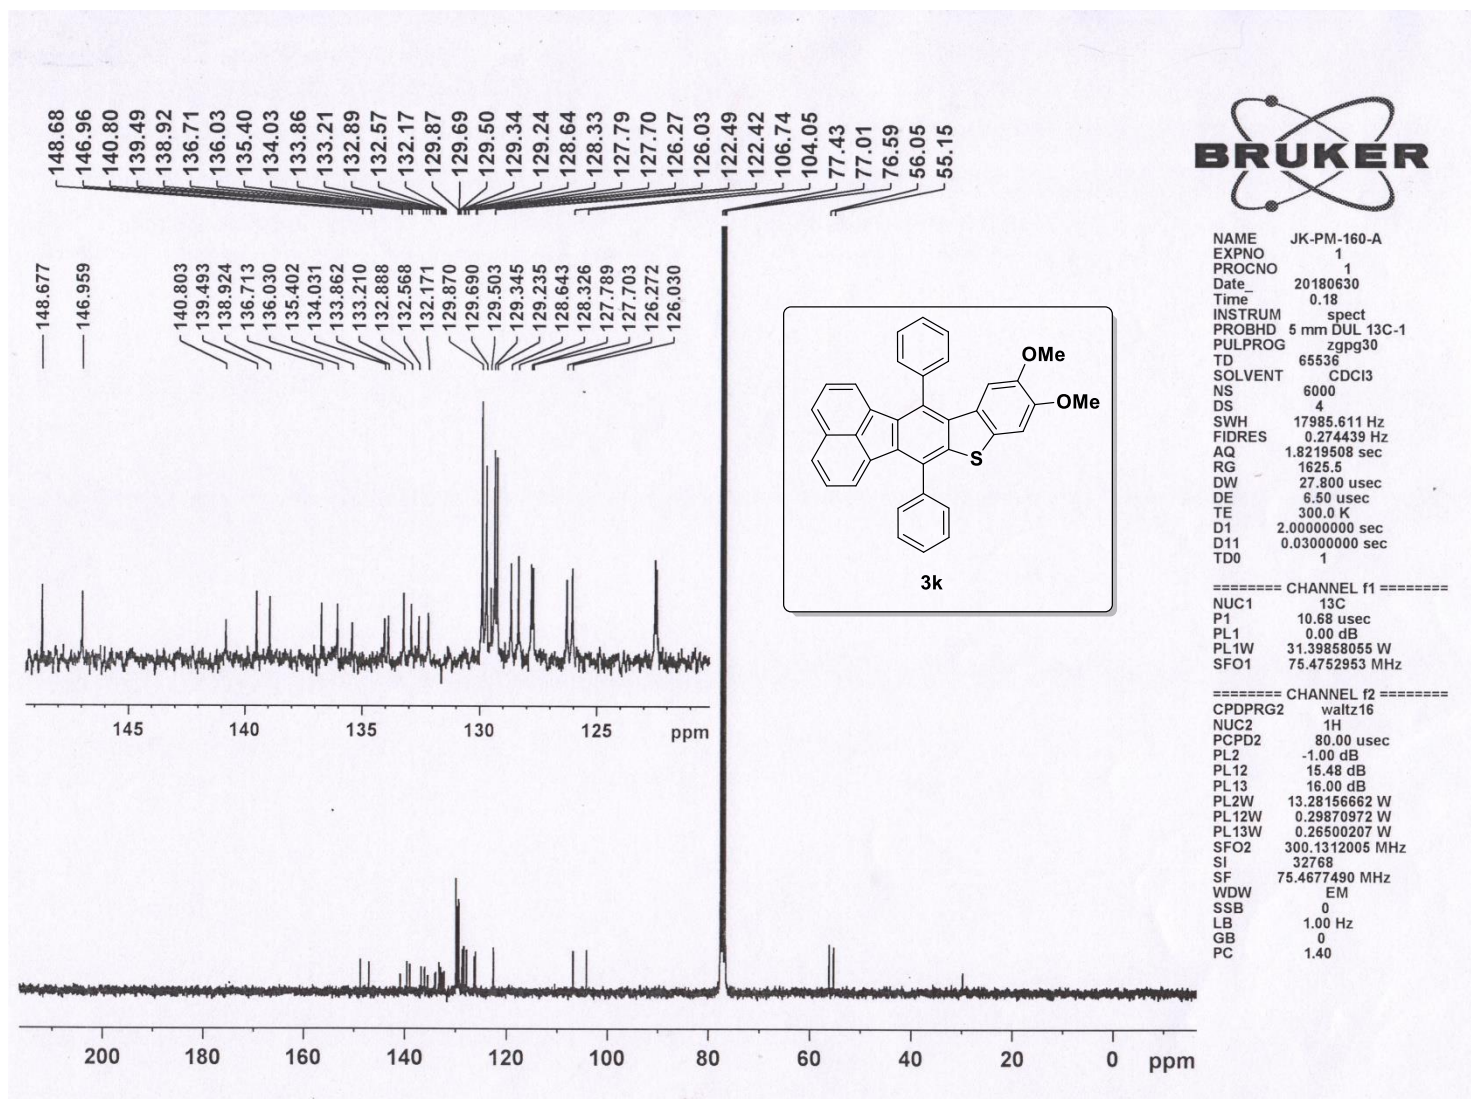

$^{13}\text{C}$ -NMR (75 MHz,  $\text{CDCl}_3$ ) spectrum of compound **3k**



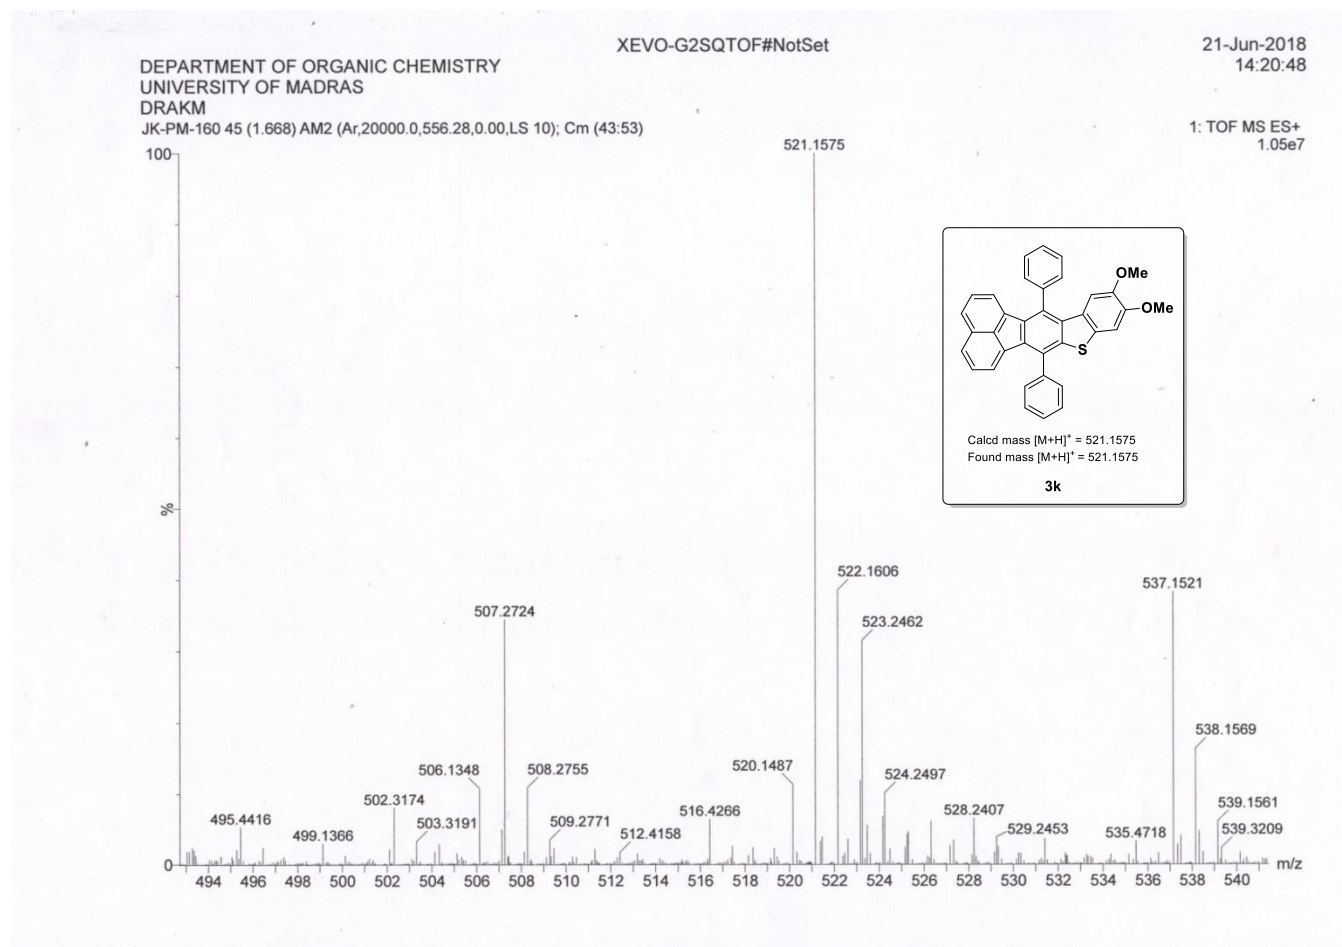

HRMS spectrum of compound **3k**

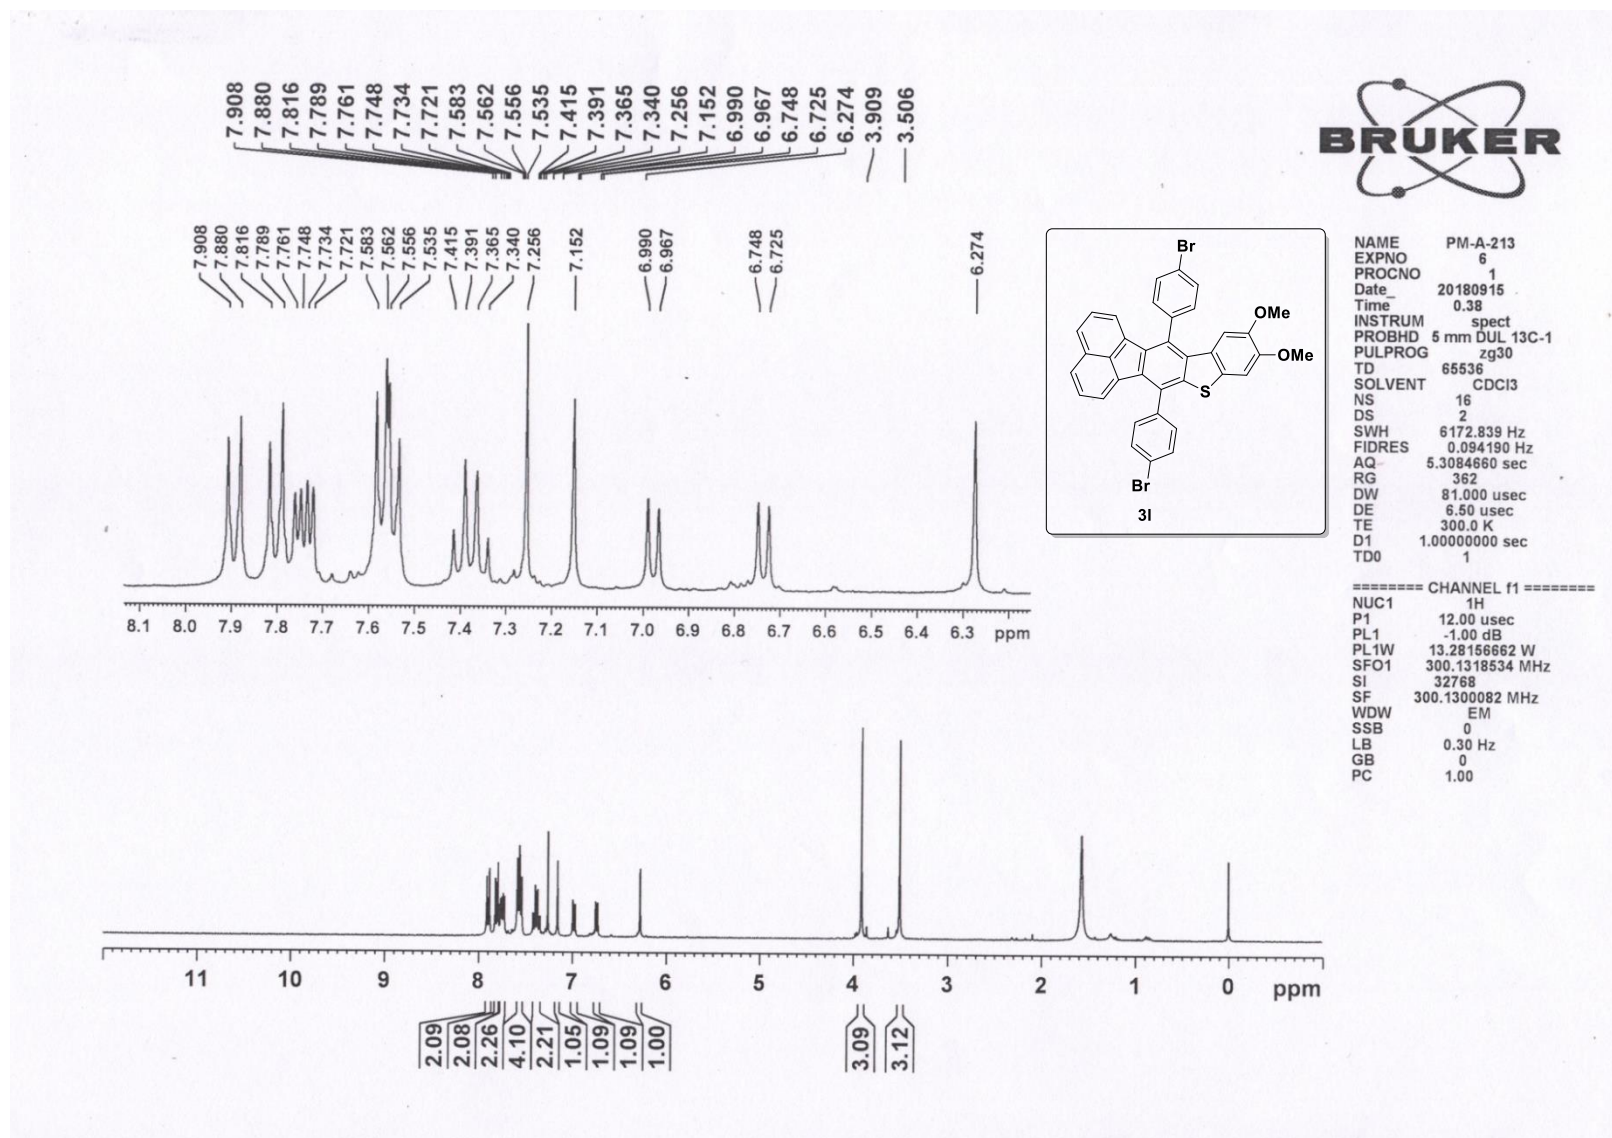

<sup>1</sup>H-NMR (300 MHz, CDCl<sub>3</sub>) spectrum of compound **3l**

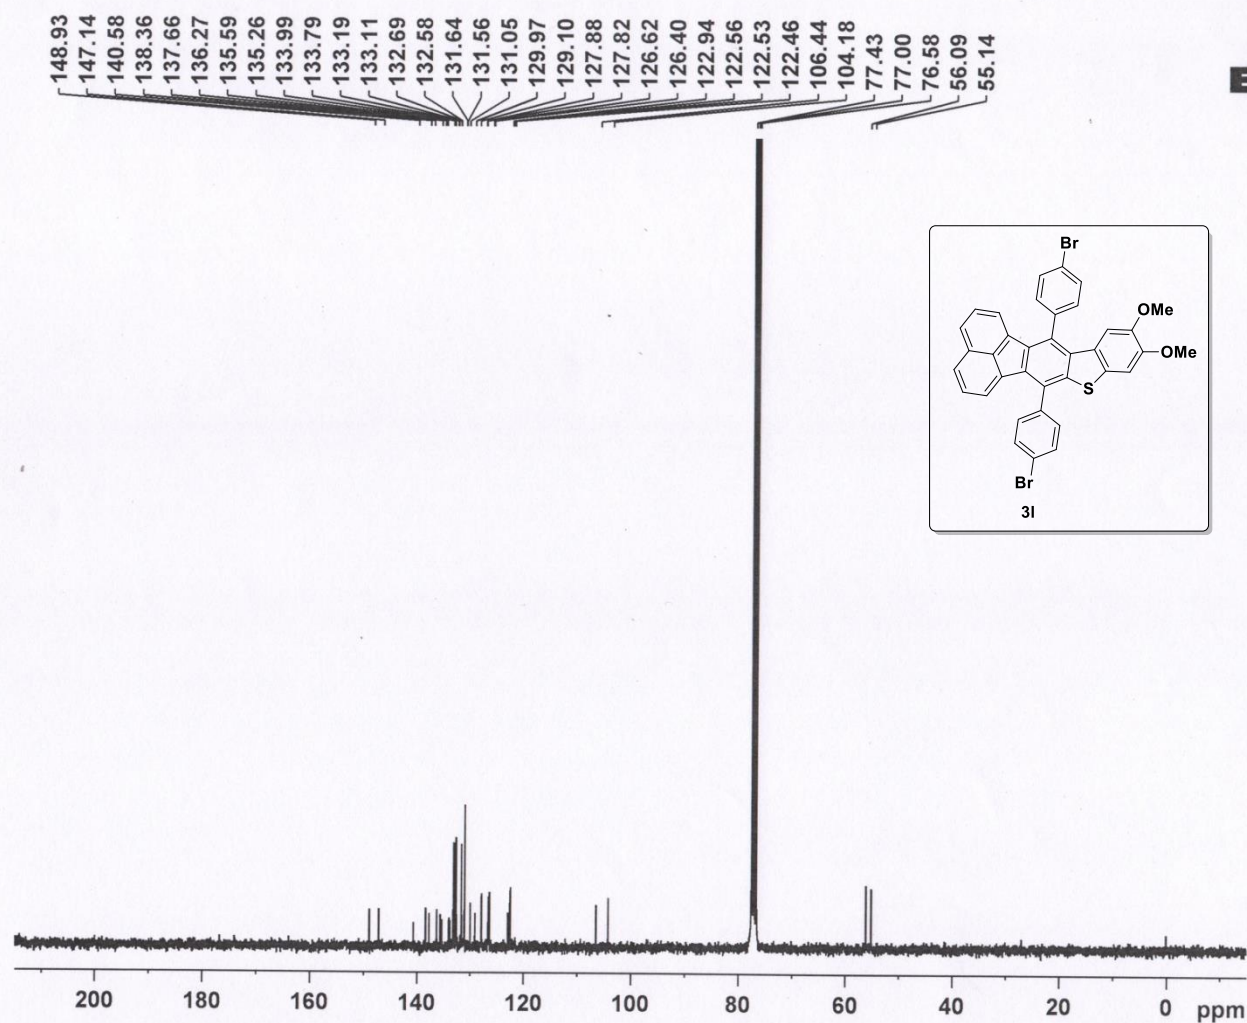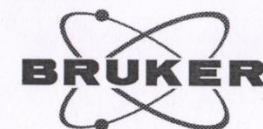

NAME PM-A-213  
 EXPNO 7  
 PROCNO 1  
 Date\_ 20180915  
 Time 3.54  
 INSTRUM spect  
 PROBHD 5 mm DUL 13C-1  
 PULPROG zgpg30  
 TD 65536  
 SOLVENT  $\text{CDCl}_3$   
 NS 3000  
 DS 4  
 SWH 17985.611 Hz  
 FIDRES 0.274439 Hz  
 AQ 1.8219508 sec  
 RG 1625.5  
 DW 27.800 usec  
 DE 6.50 usec  
 TE 300.0 K  
 D1 2.00000000 sec  
 D11 0.03000000 sec  
 TDO 1

===== CHANNEL f1 =====  
 NUC1  $^{13}\text{C}$   
 P1 10.68 usec  
 PL1 0.00 dB  
 PL1W 31.39858055 W  
 SFO1 75.4752953 MHz

===== CHANNEL f2 =====  
 CPDPRG2 waltz16  
 NUC2  $^1\text{H}$   
 PCPD2 80.00 usec  
 PL2 -1.00 dB  
 PL12 15.48 dB  
 PL13 16.00 dB  
 PL2W 13.28156662 W  
 PL12W 0.29870972 W  
 PL13W 0.26500207 W  
 SFO2 300.1312005 MHz  
 SI 32768  
 SF 75.4677490 MHz  
 WDW EM  
 SSB 0  
 LB 1.00 Hz  
 GB 0  
 PC 1.40

$^{13}\text{C}$ -NMR (75 MHz,  $\text{CDCl}_3$ ) spectrum of compound **3l**



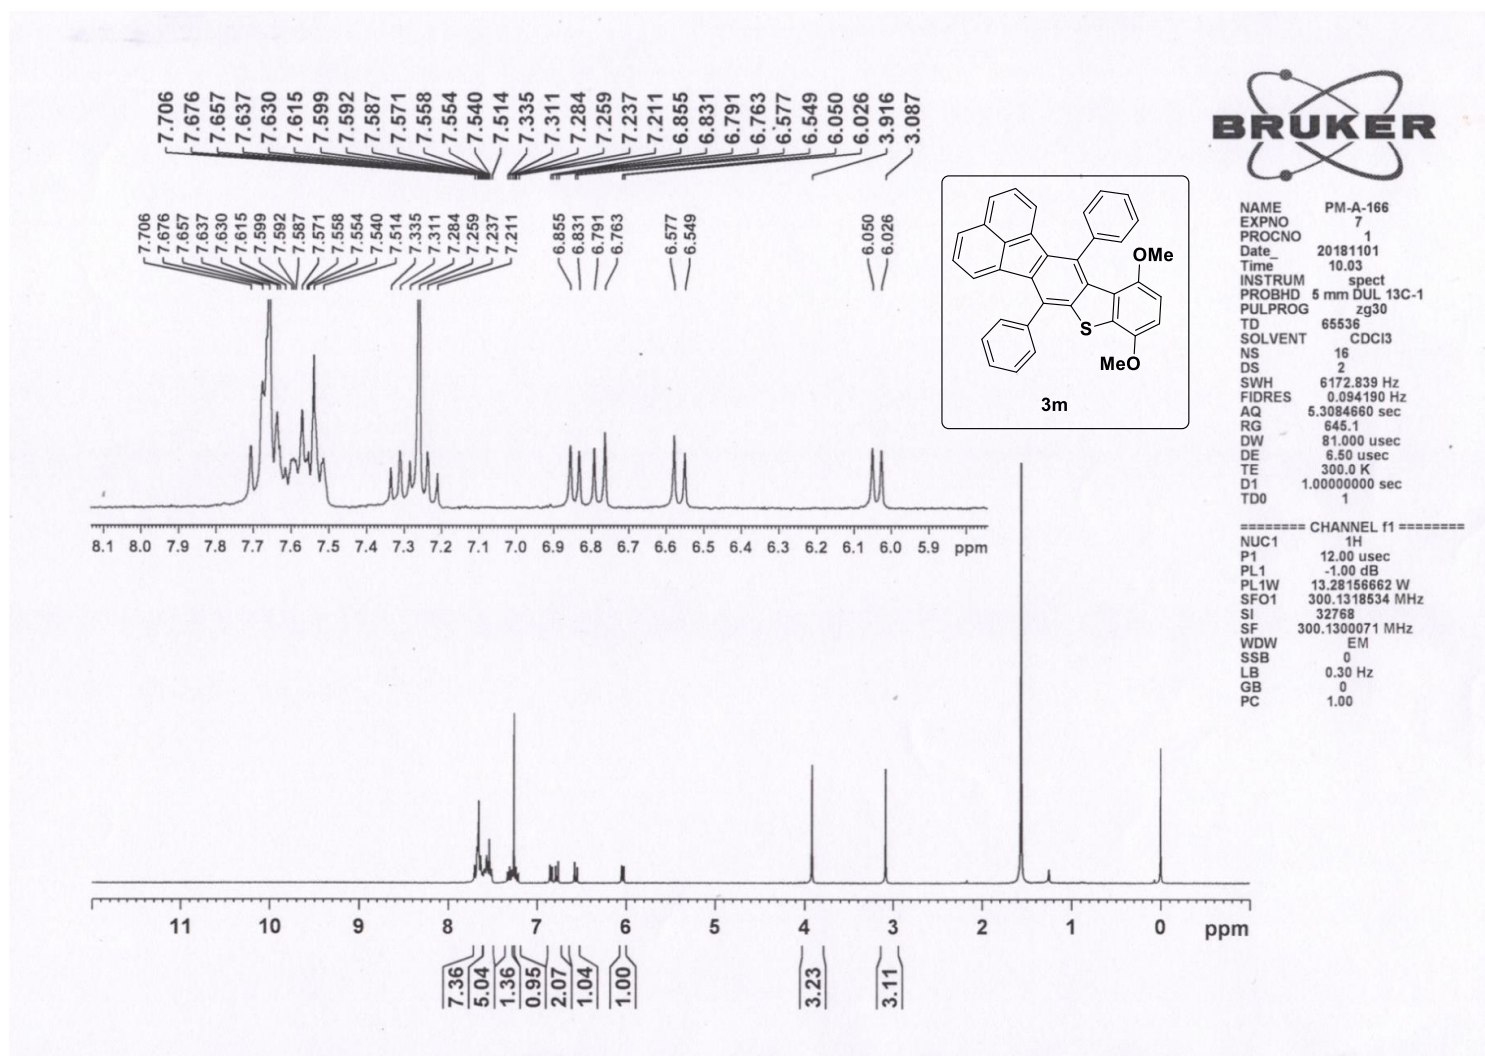

<sup>1</sup>H-NMR (300 MHz, CDCl<sub>3</sub>) spectrum of compound **3m**

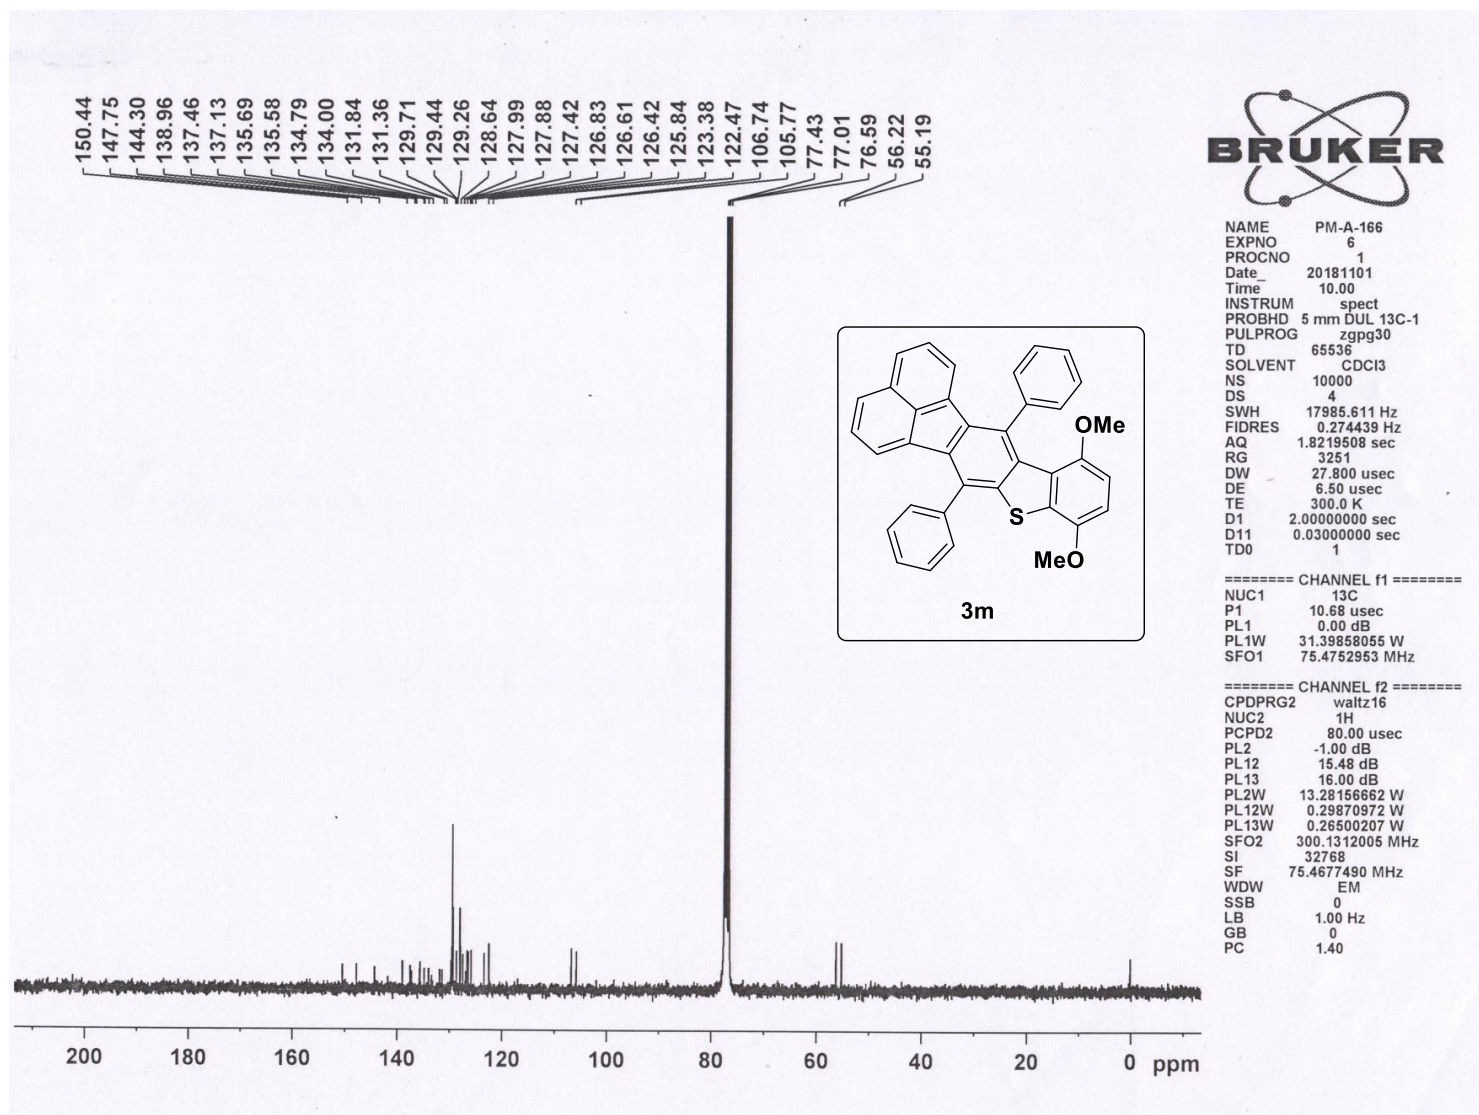

$^{13}\text{C}$ -NMR (75 MHz,  $\text{CDCl}_3$ ) spectrum of compound **3m**



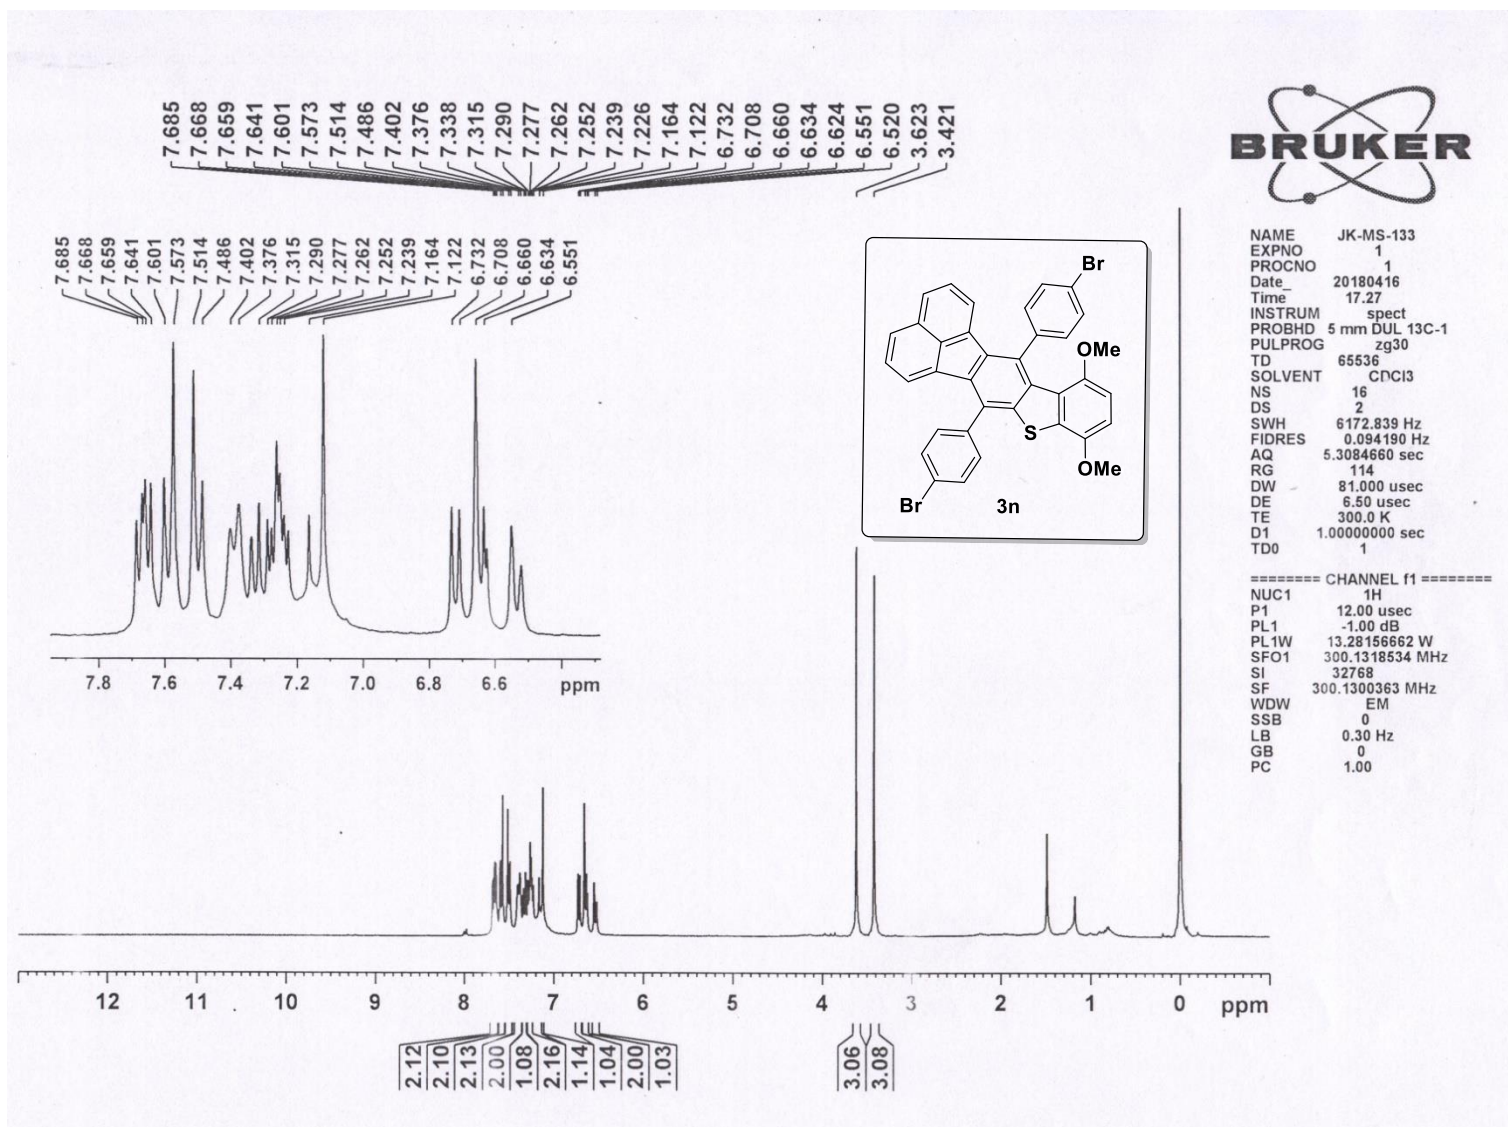

<sup>1</sup>H-NMR (300 MHz, CDCl<sub>3</sub>) spectrum of compound **3n**

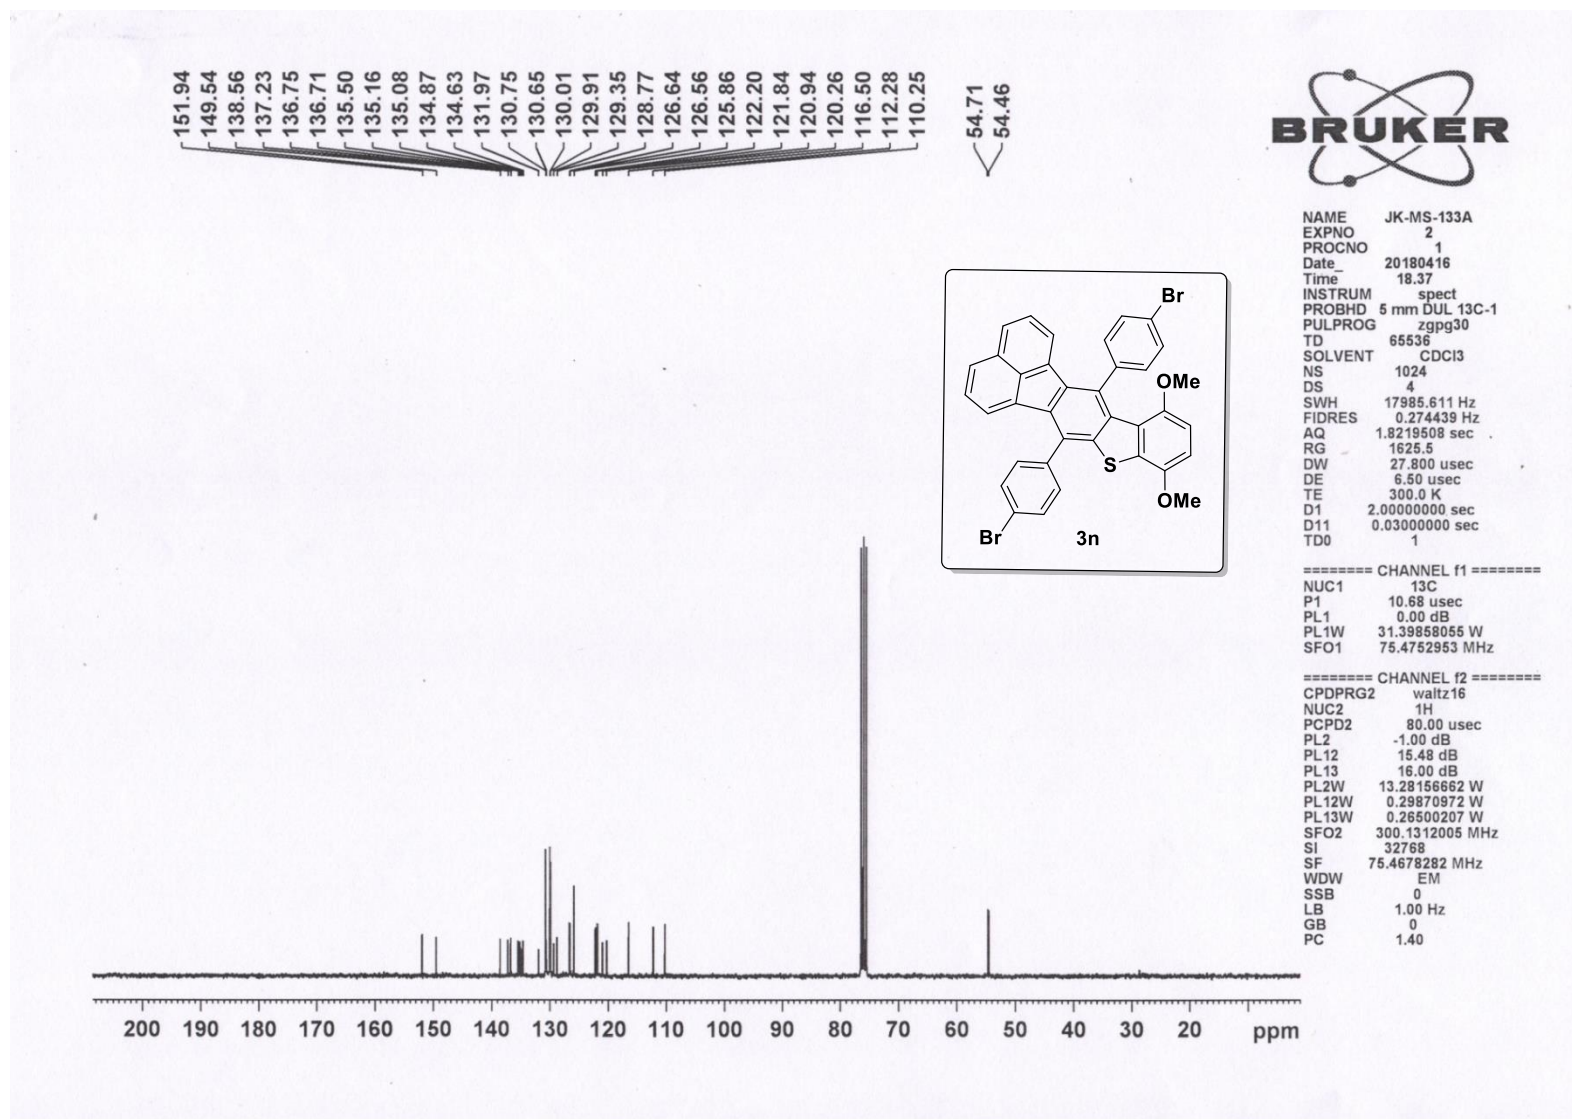

$^{13}\text{C}$ -NMR (75 MHz,  $\text{CDCl}_3$ ) spectrum of compound **3n**





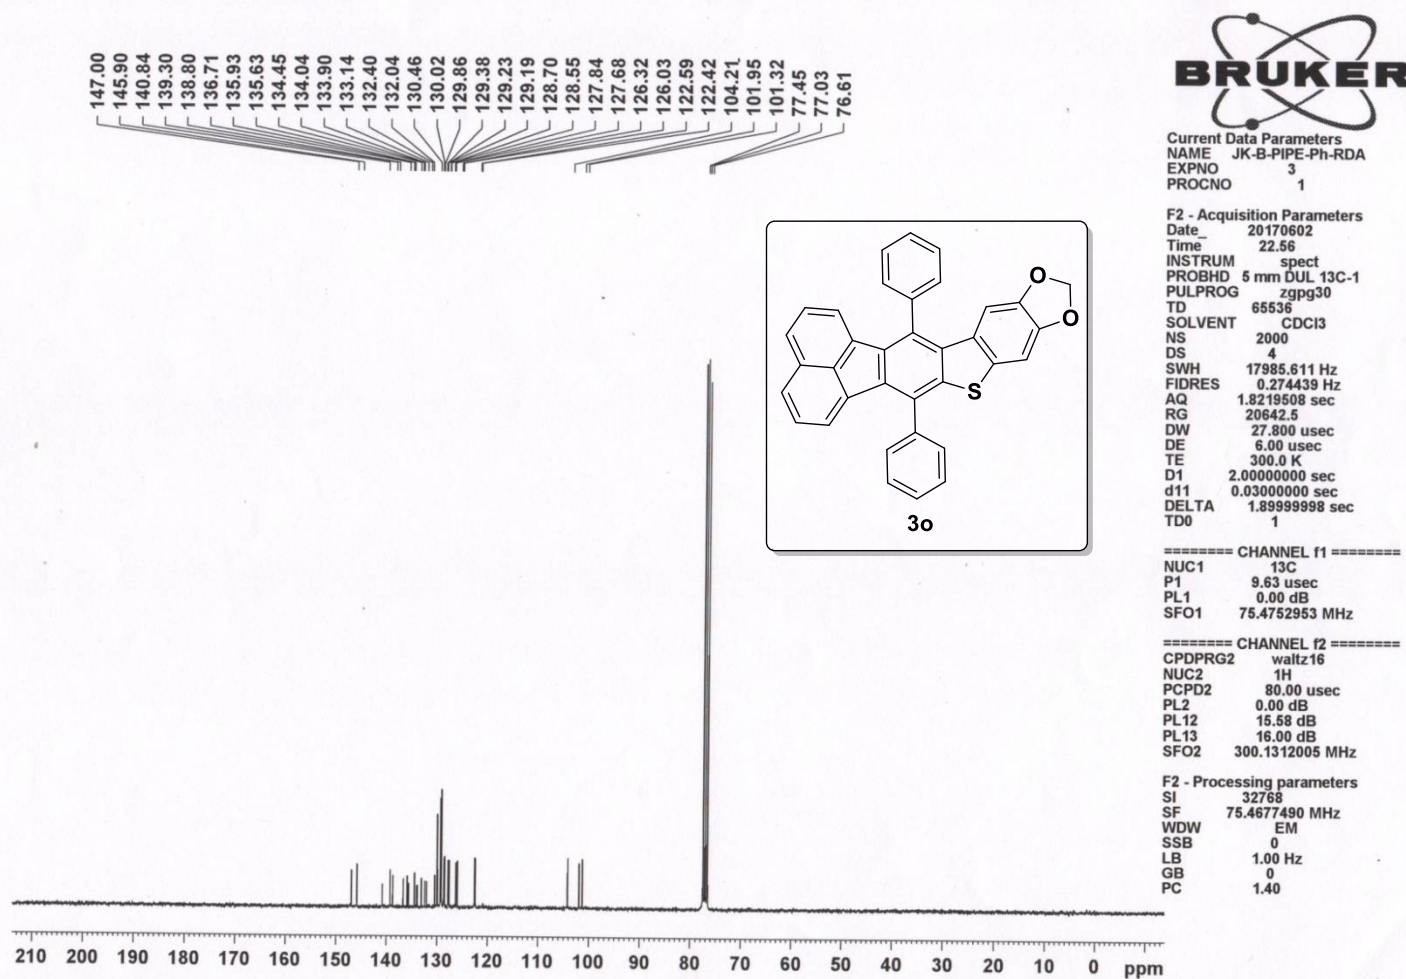

$^{13}\text{C}$ -NMR (75 MHz,  $\text{CDCl}_3$ ) spectrum of compound **3o**

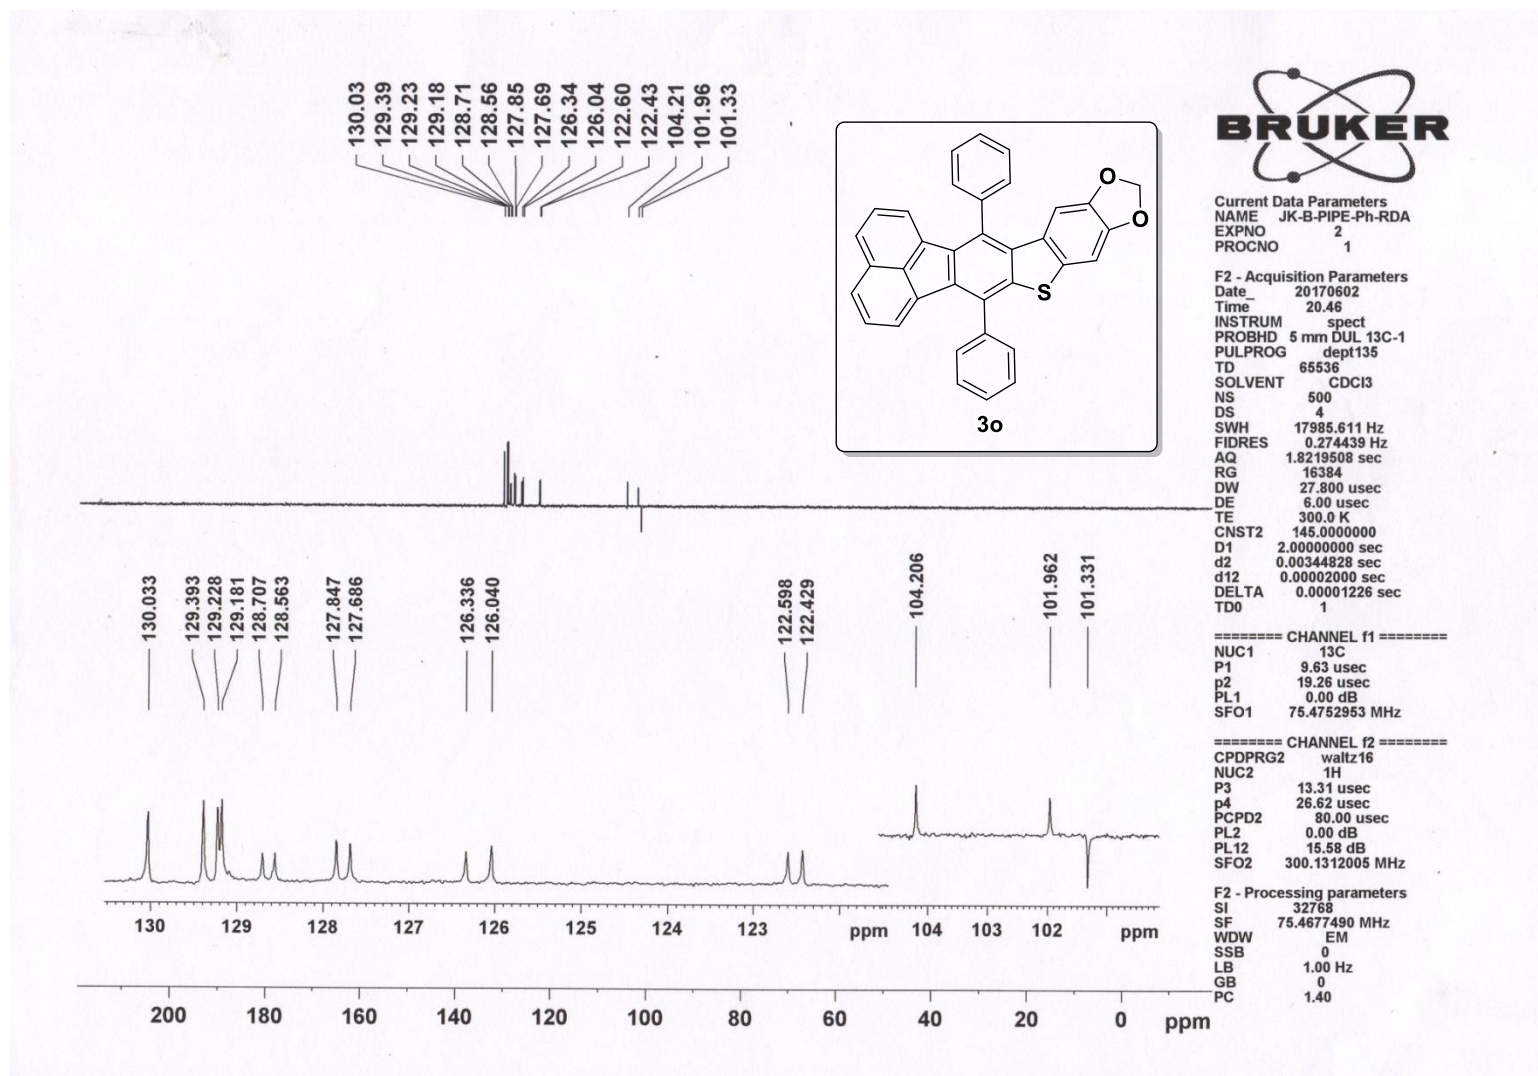

DEPT-135 NMR (75 MHz, CDCl<sub>3</sub>) spectrum of compound **3o**



DEPARTMENT OF ORGANIC CHEMISTRY  
UNIVERSITY OF MADRAS  
DRAKM  
JK-B-Ph 51 (1.888) AM2 (Ar,20000.0,556.28,0.00,LS 10)

XEVO-G2SQTOF#NotSet

02-Nov-2018  
12:36:42

1: TOF MS ES+  
1.53e6

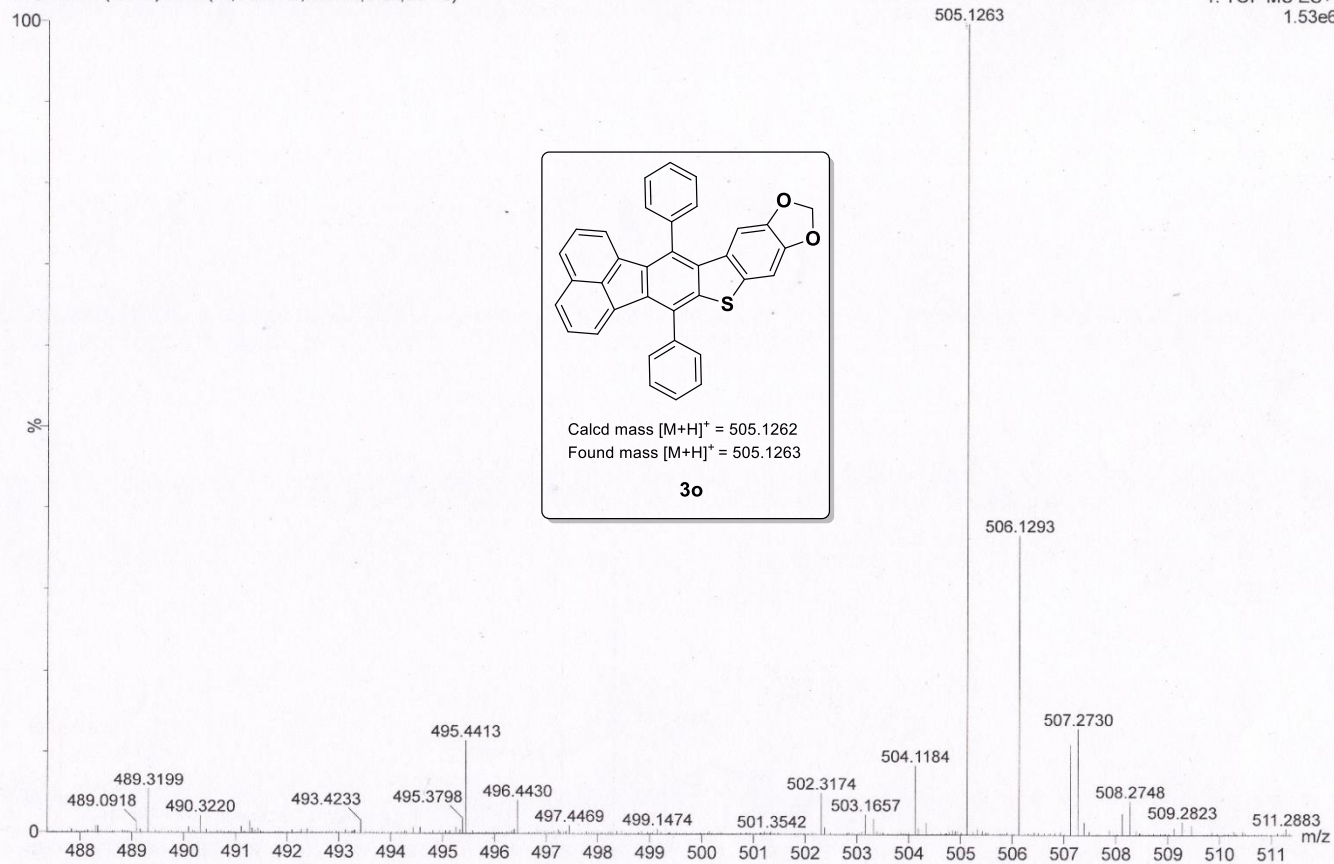

HRMS spectrum of compound **3o**

S123

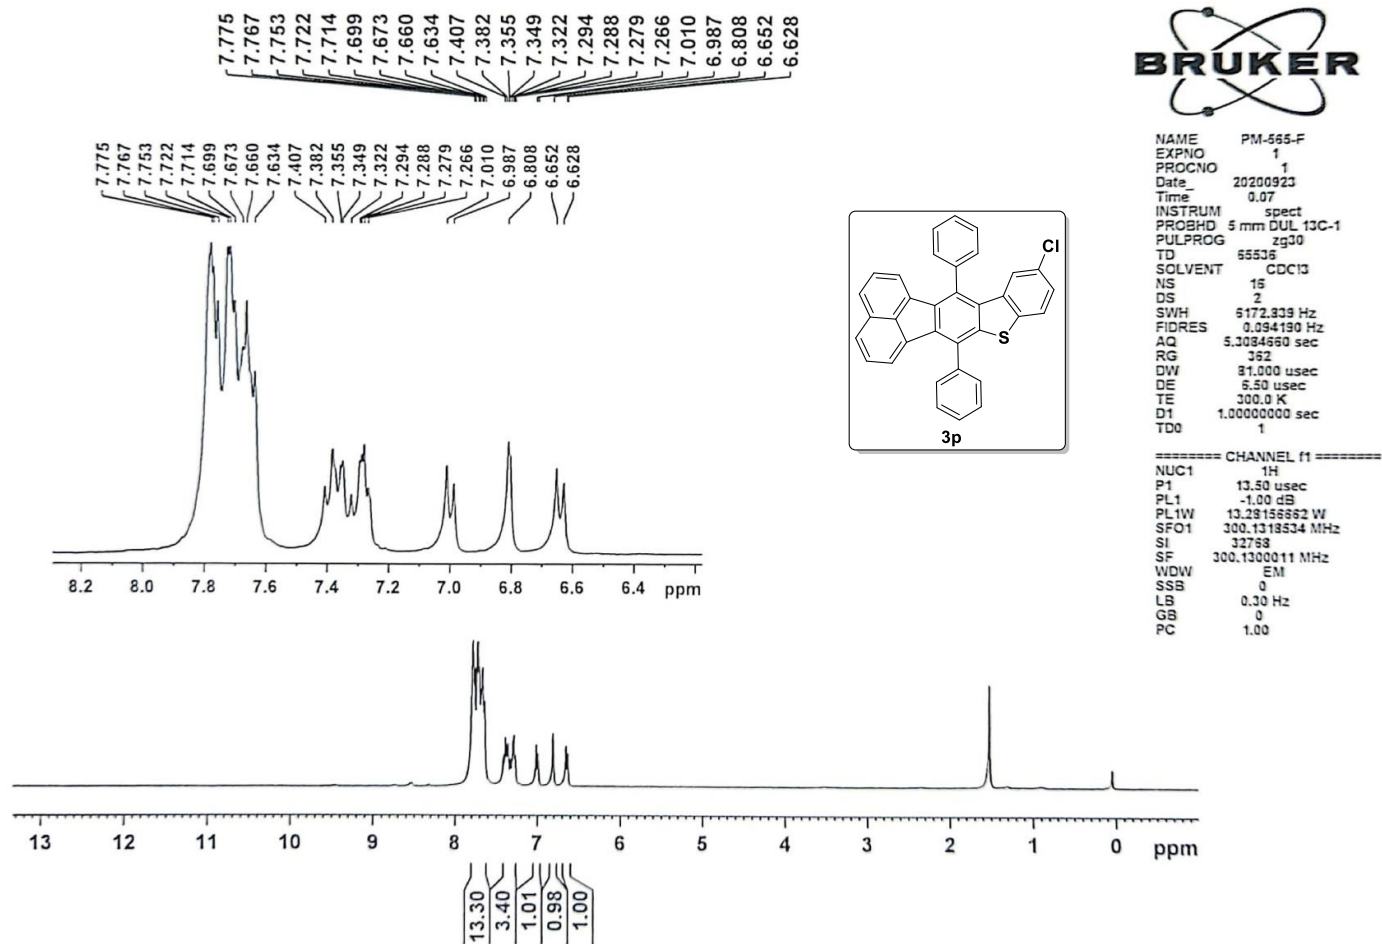

<sup>1</sup>H-NMR (300 MHz, CDCl<sub>3</sub>) spectrum of compound **3p**

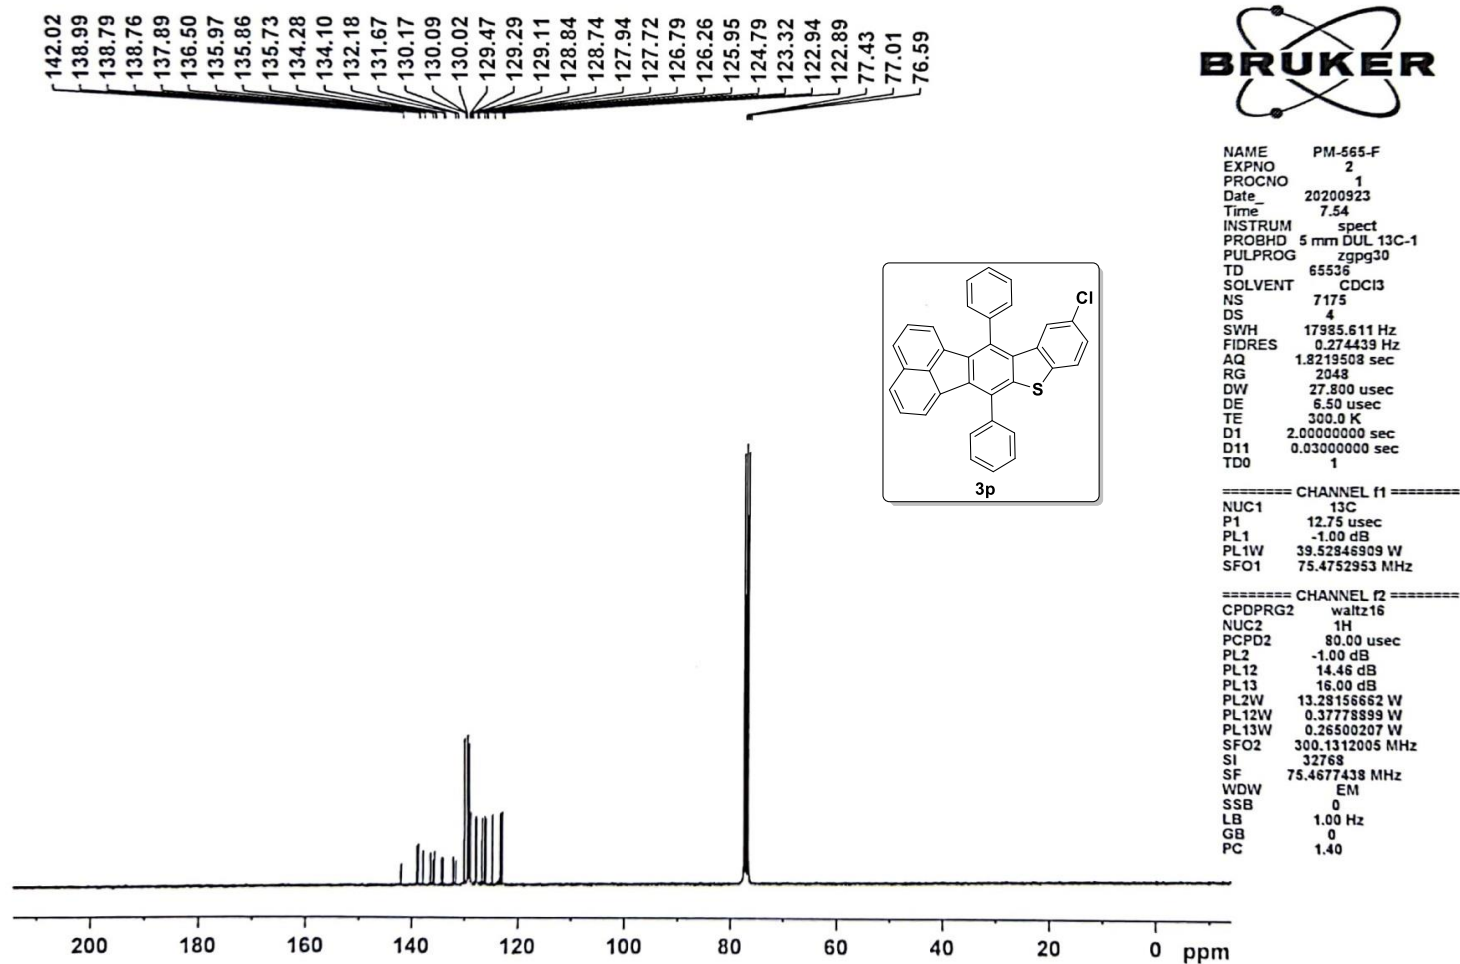

<sup>13</sup>C-NMR (75 MHz, CDCl<sub>3</sub>) spectrum of compound **3p**

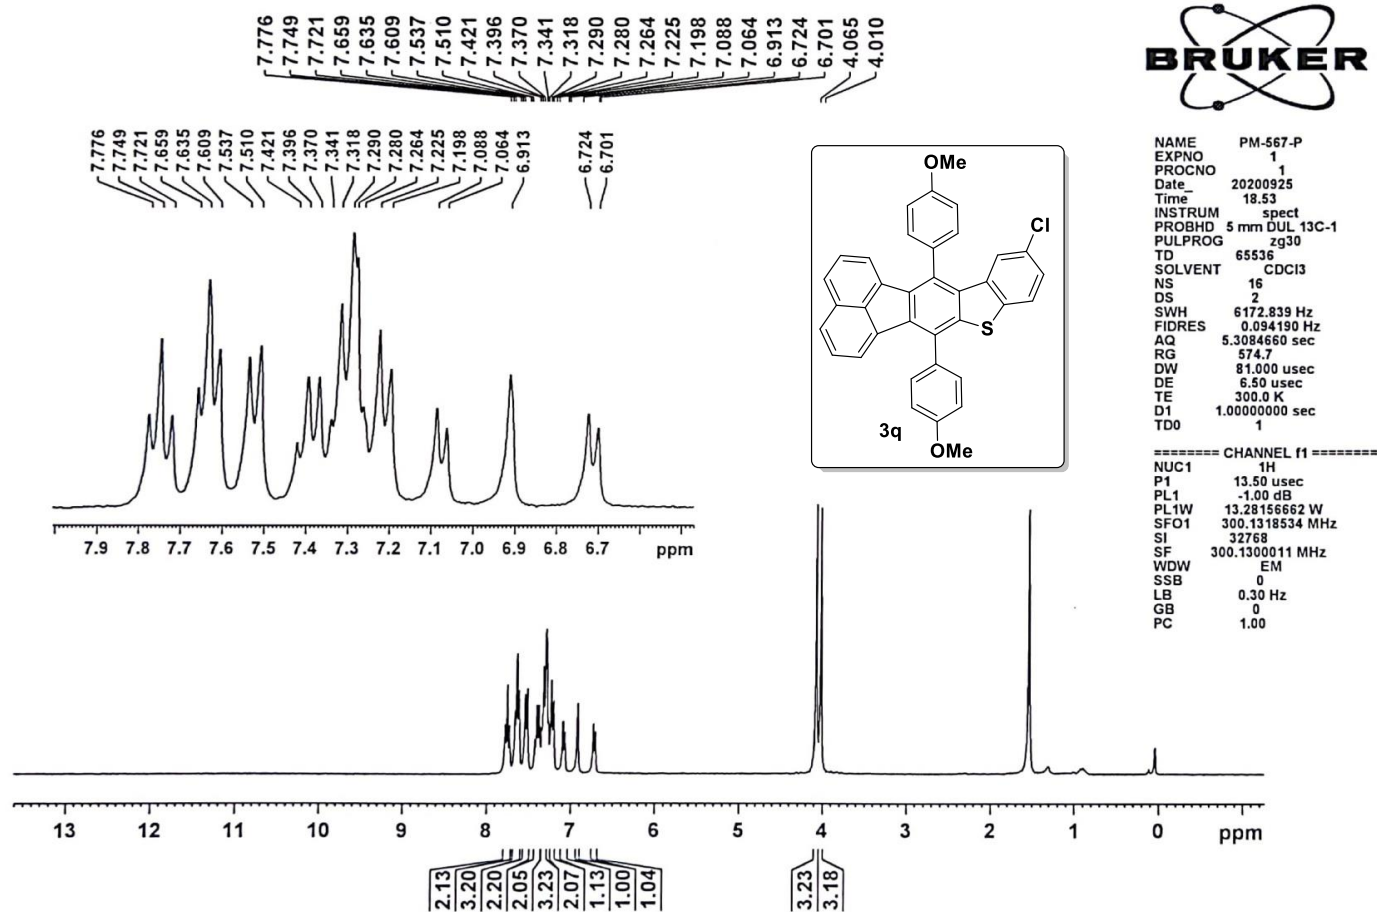

$^1\text{H}$ -NMR (300 MHz,  $\text{CDCl}_3$ ) spectrum of compound **3p**

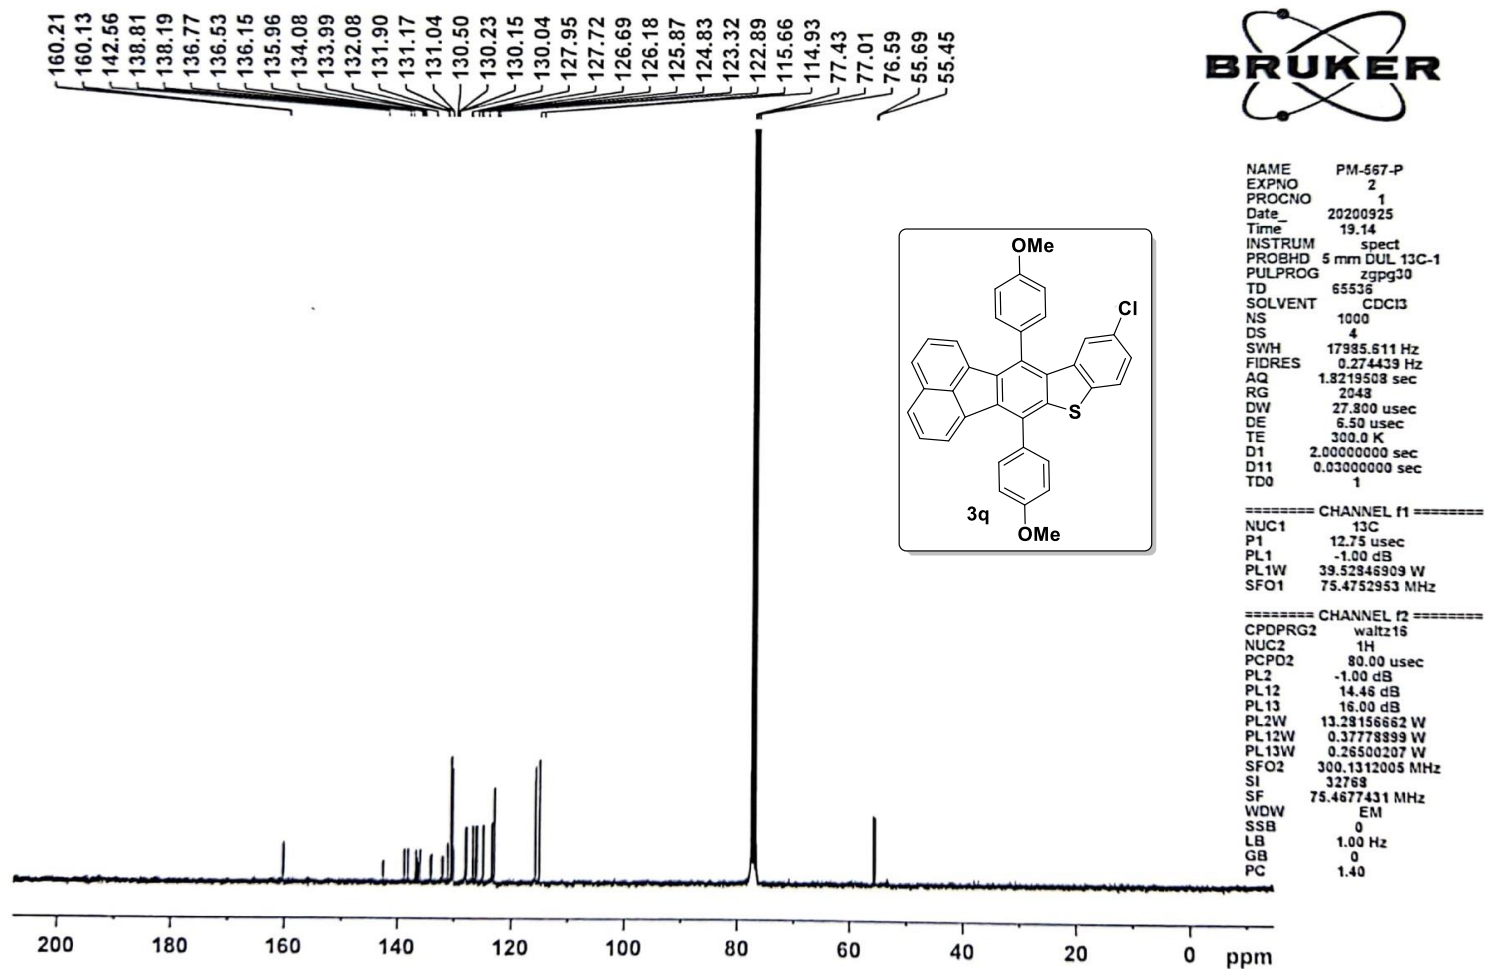

**<sup>13</sup>C-NMR (75 MHz, CDCl<sub>3</sub>) spectrum of compound 3q**



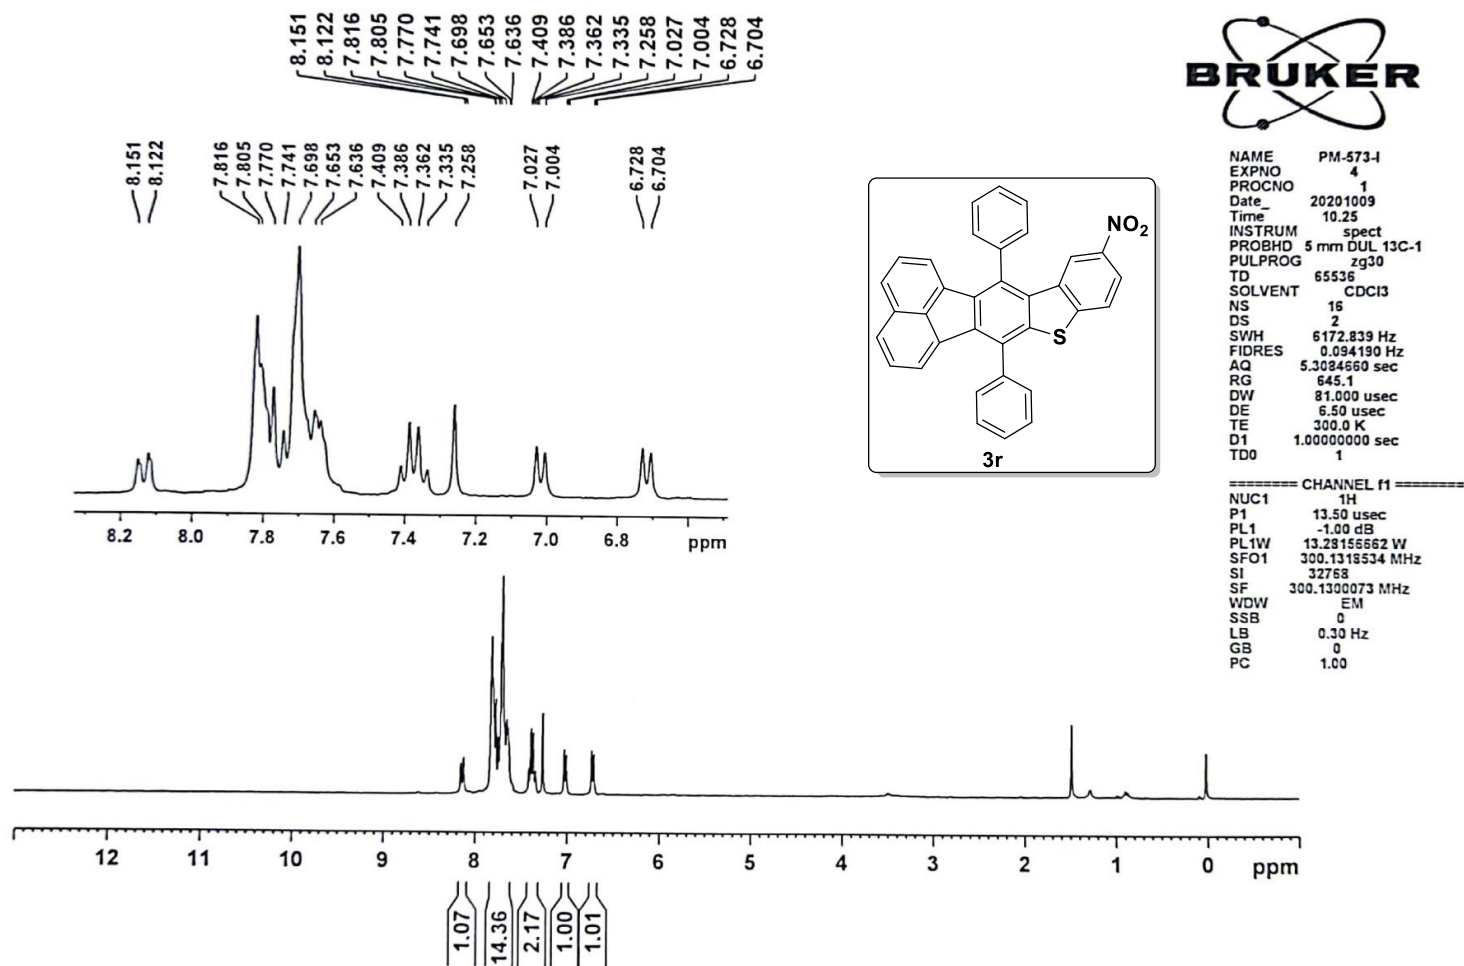

<sup>1</sup>H-NMR (300 MHz, CDCl<sub>3</sub>) spectrum of compound **3r**

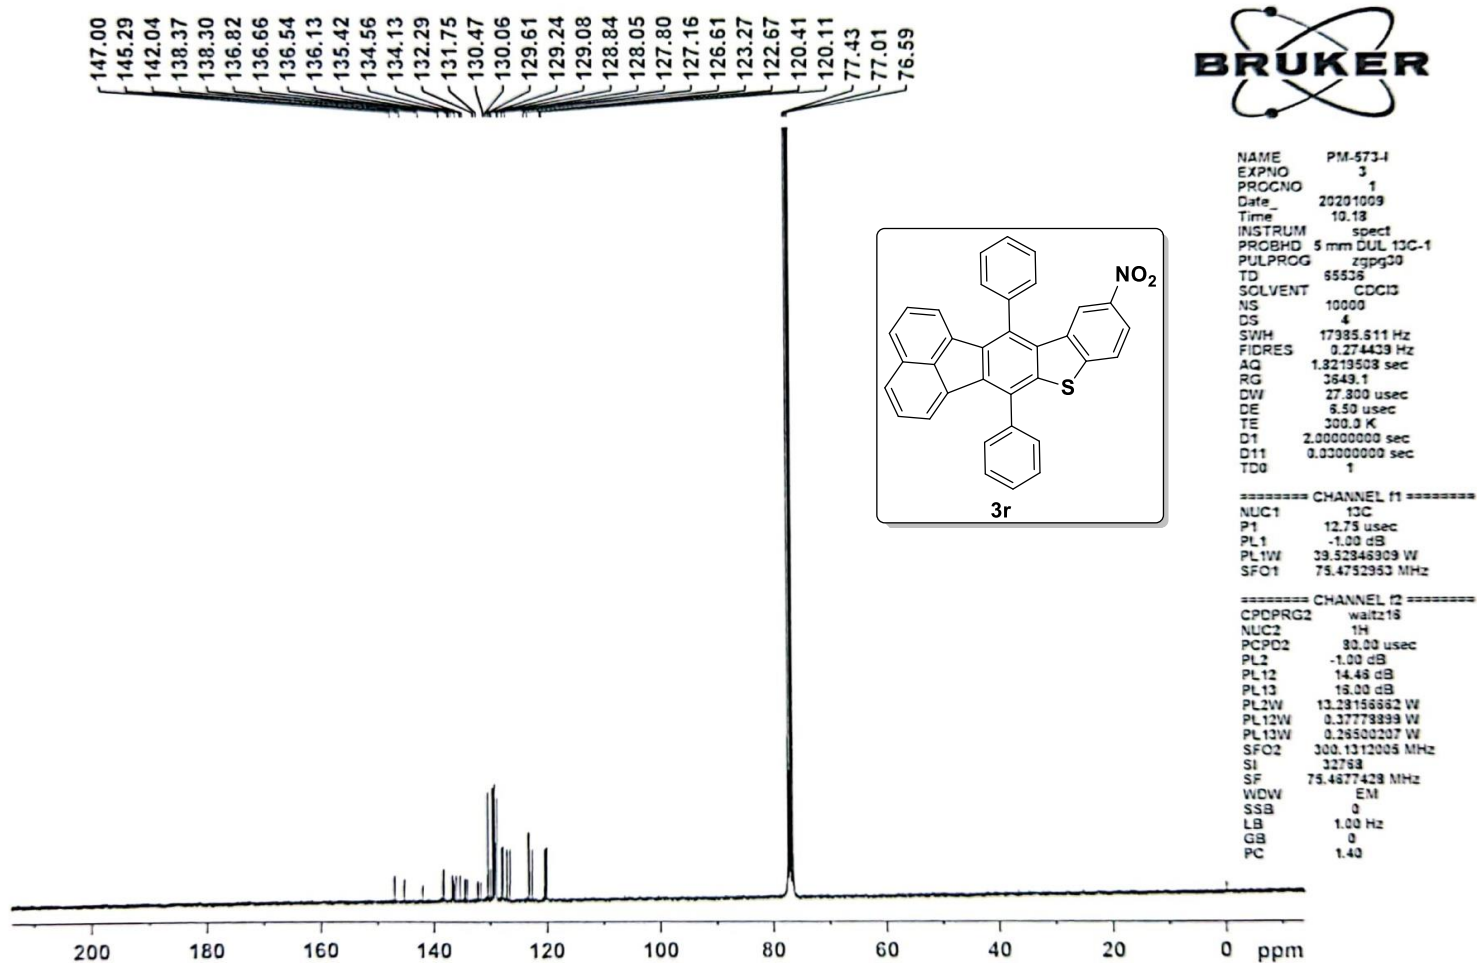

$^{13}\text{C}$ -NMR (75 MHz,  $\text{CDCl}_3$ ) spectrum of compound **3r**



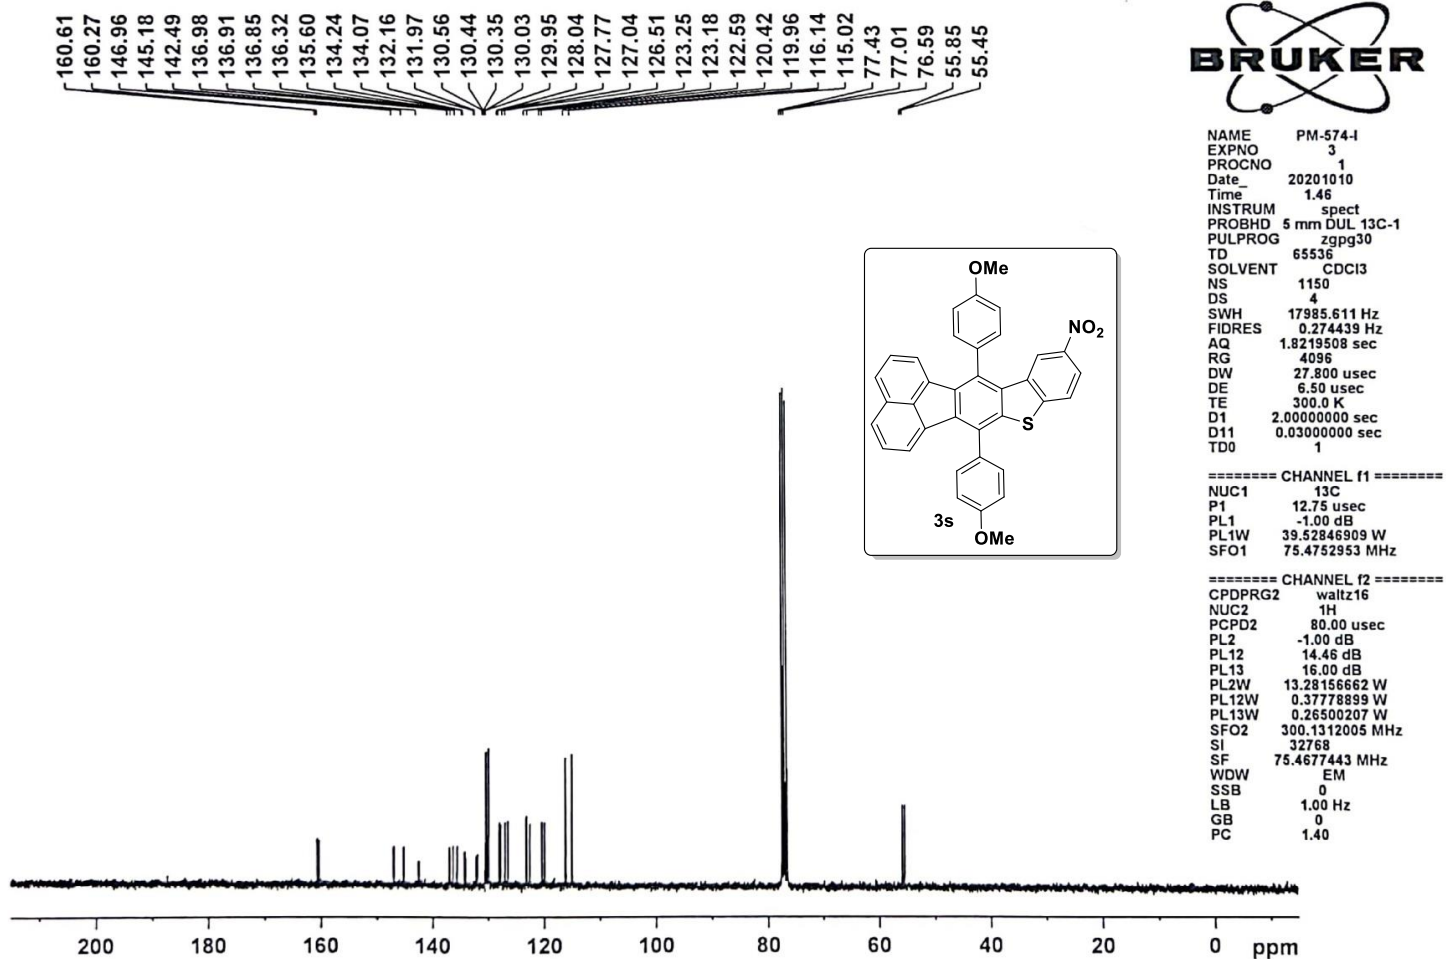

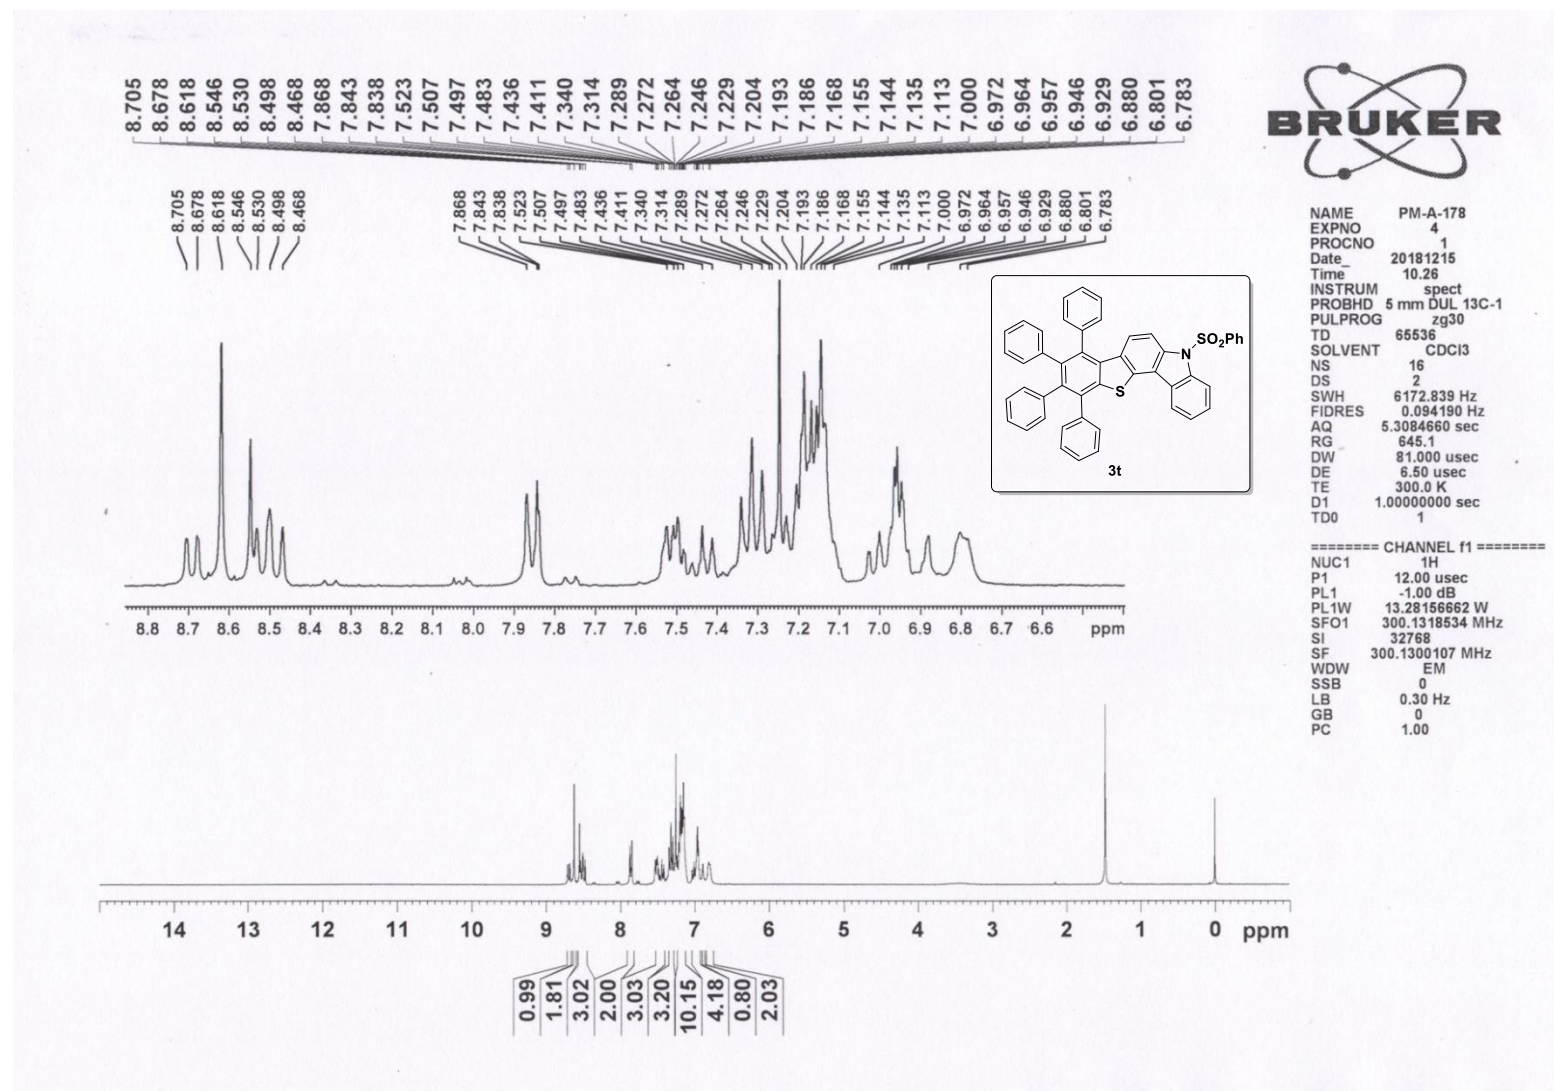

<sup>1</sup>H-NMR (300 MHz, CDCl<sub>3</sub>) spectrum of compound **3t**



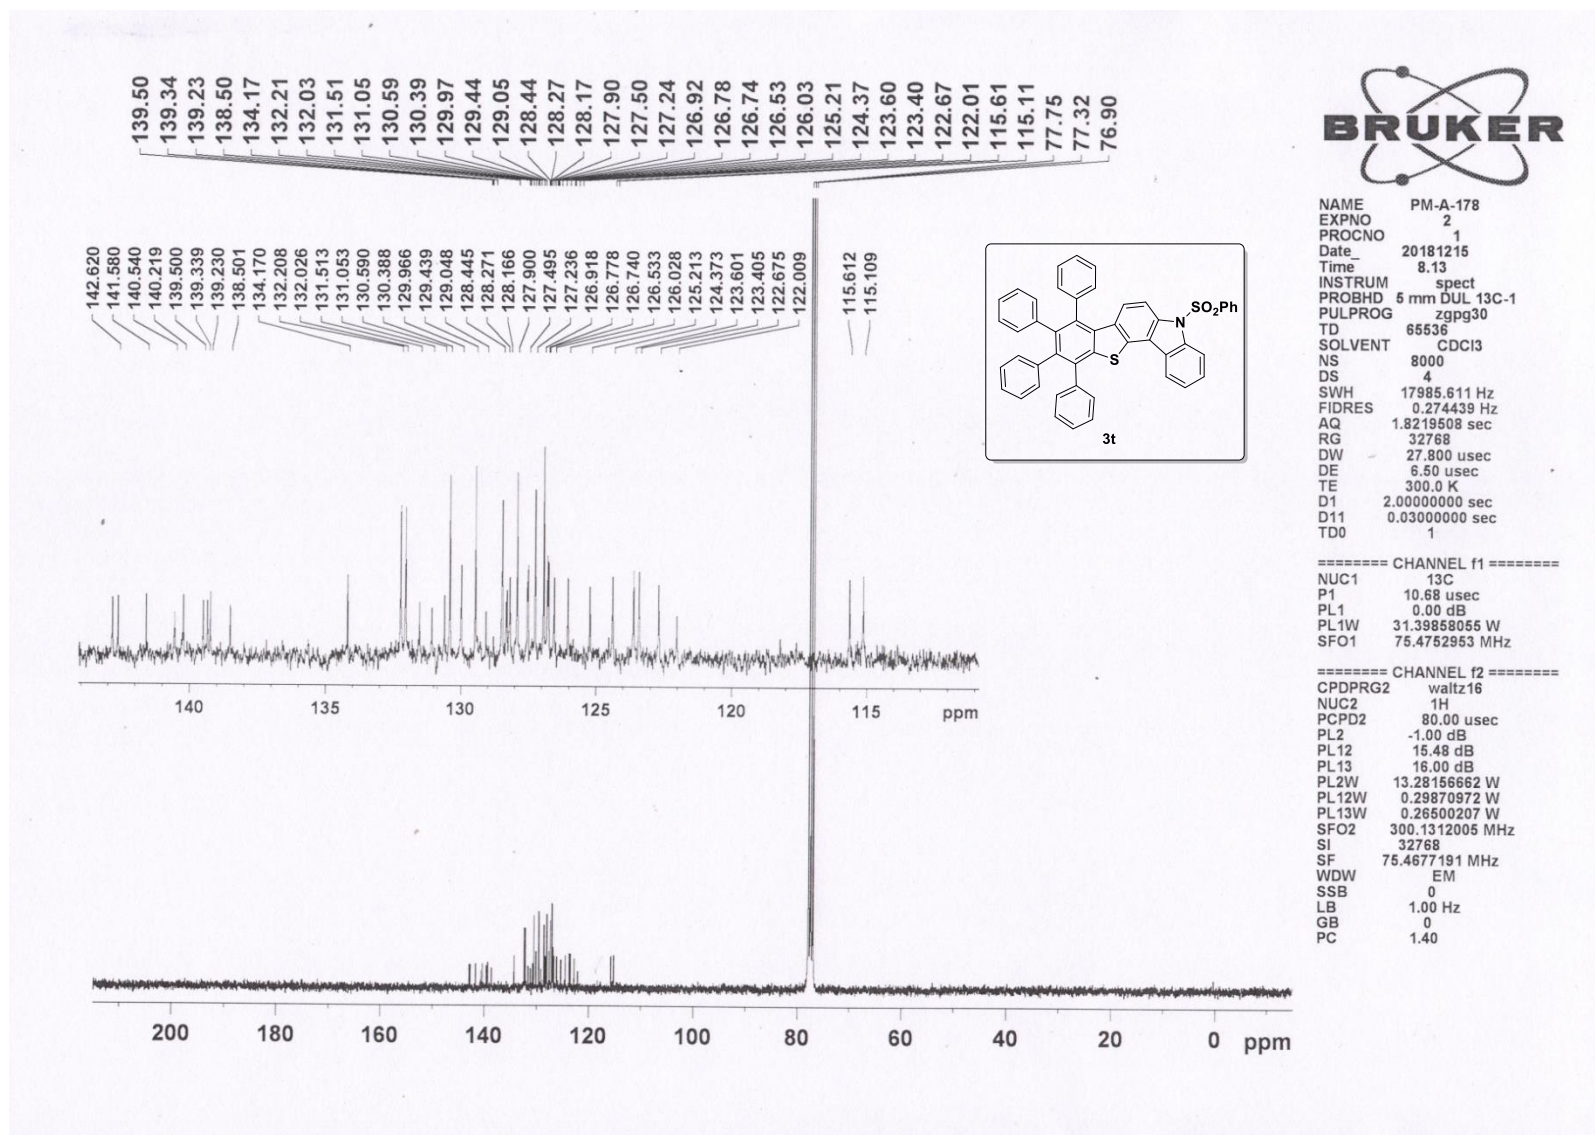

$^{13}\text{C}$ -NMR (75 MHz,  $\text{CDCl}_3$ ) spectrum of compound **3t**

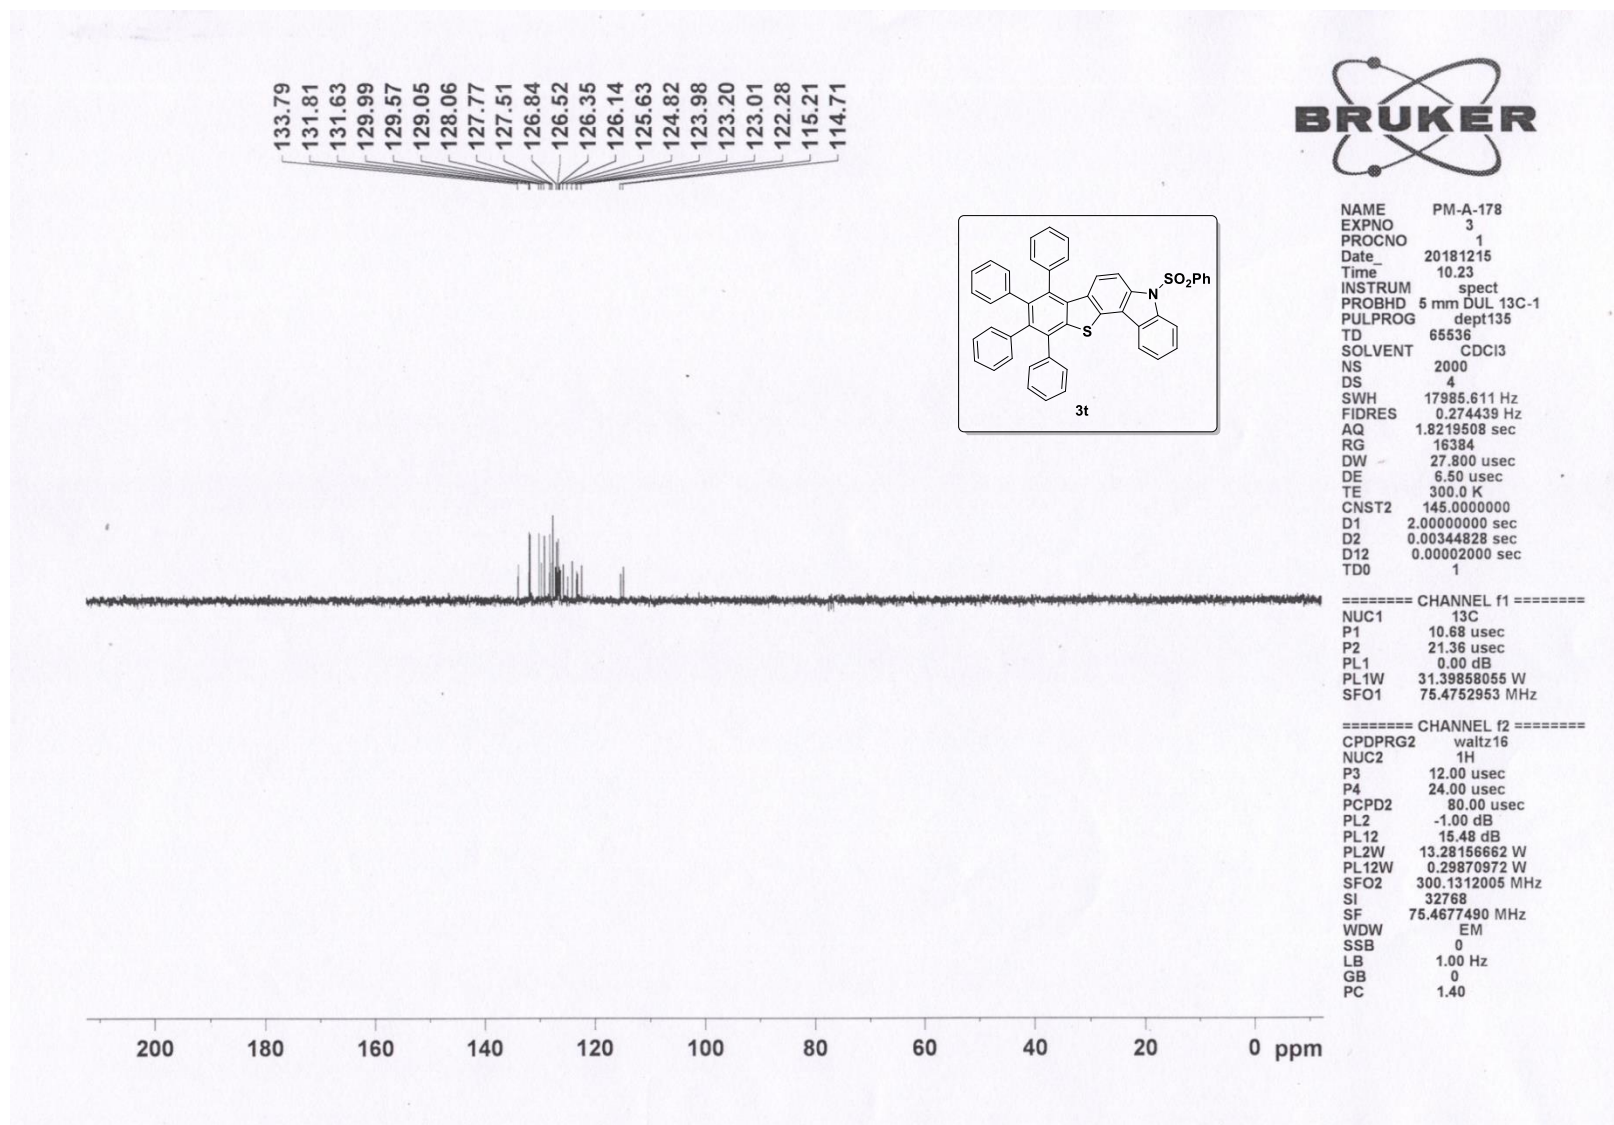

DEPT-135NMR (75 MHz, CDCl<sub>3</sub>) spectrum of compound **3t**

spa50219  
VAK-Dm-151  
iitm\_PROTON-5to15 CDCl<sub>3</sub> /opt/topspin nmr 5

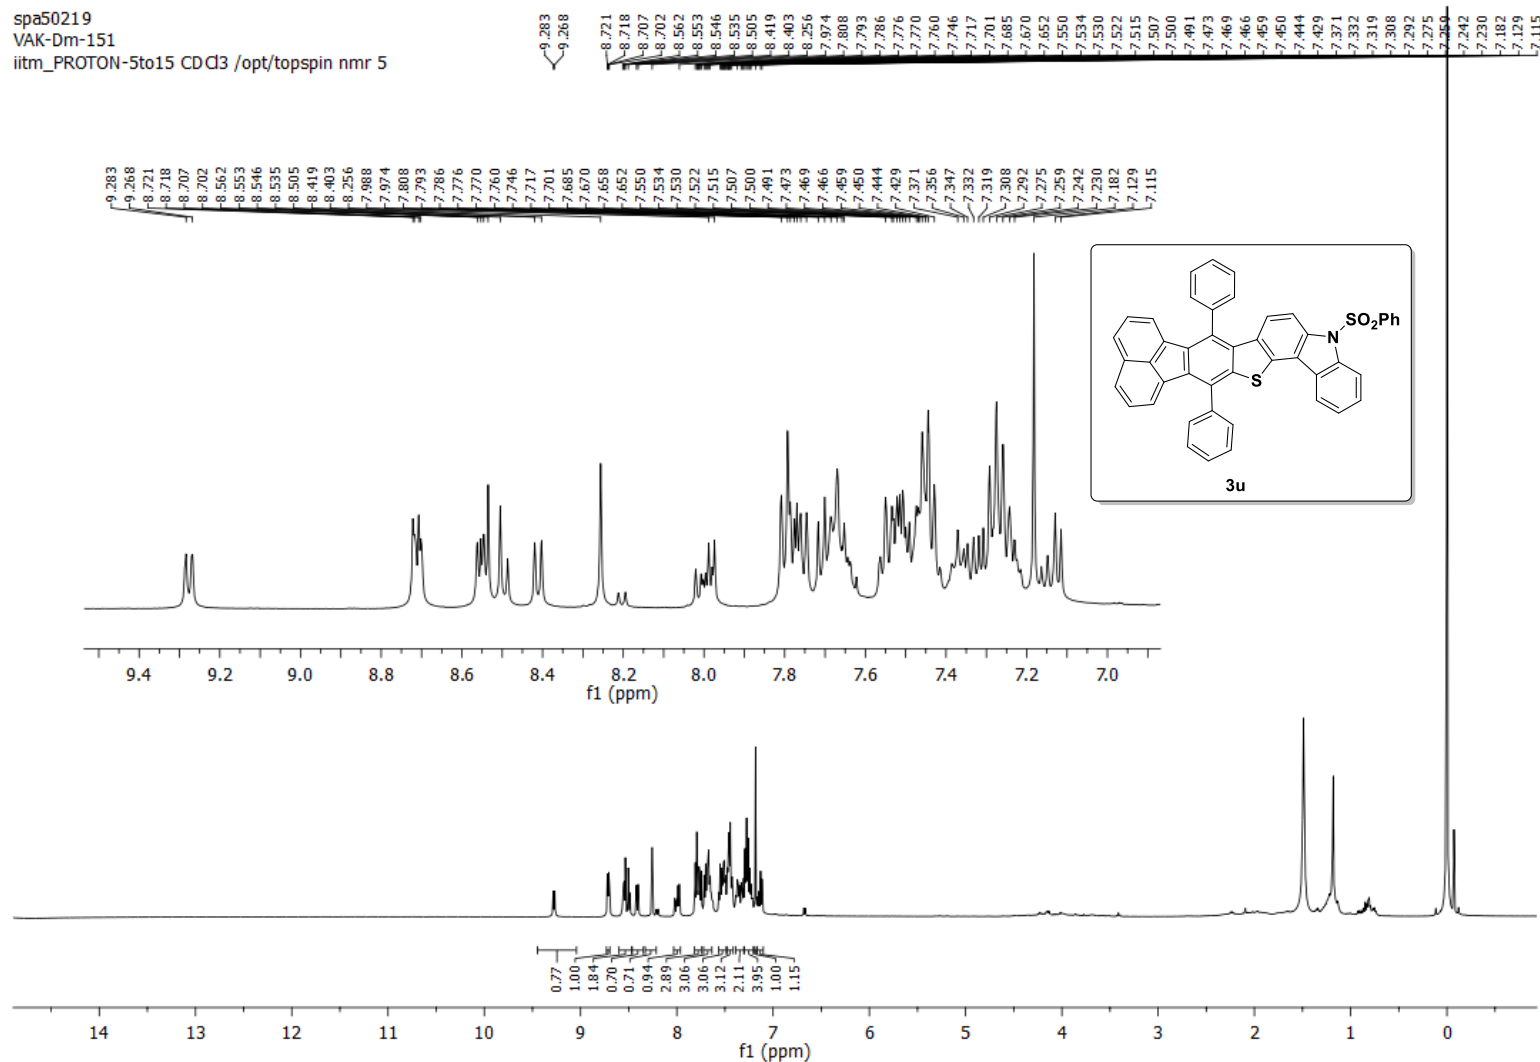

<sup>1</sup>H-NMR (300 MHz, CDCl<sub>3</sub>) spectrum of compound **3u**

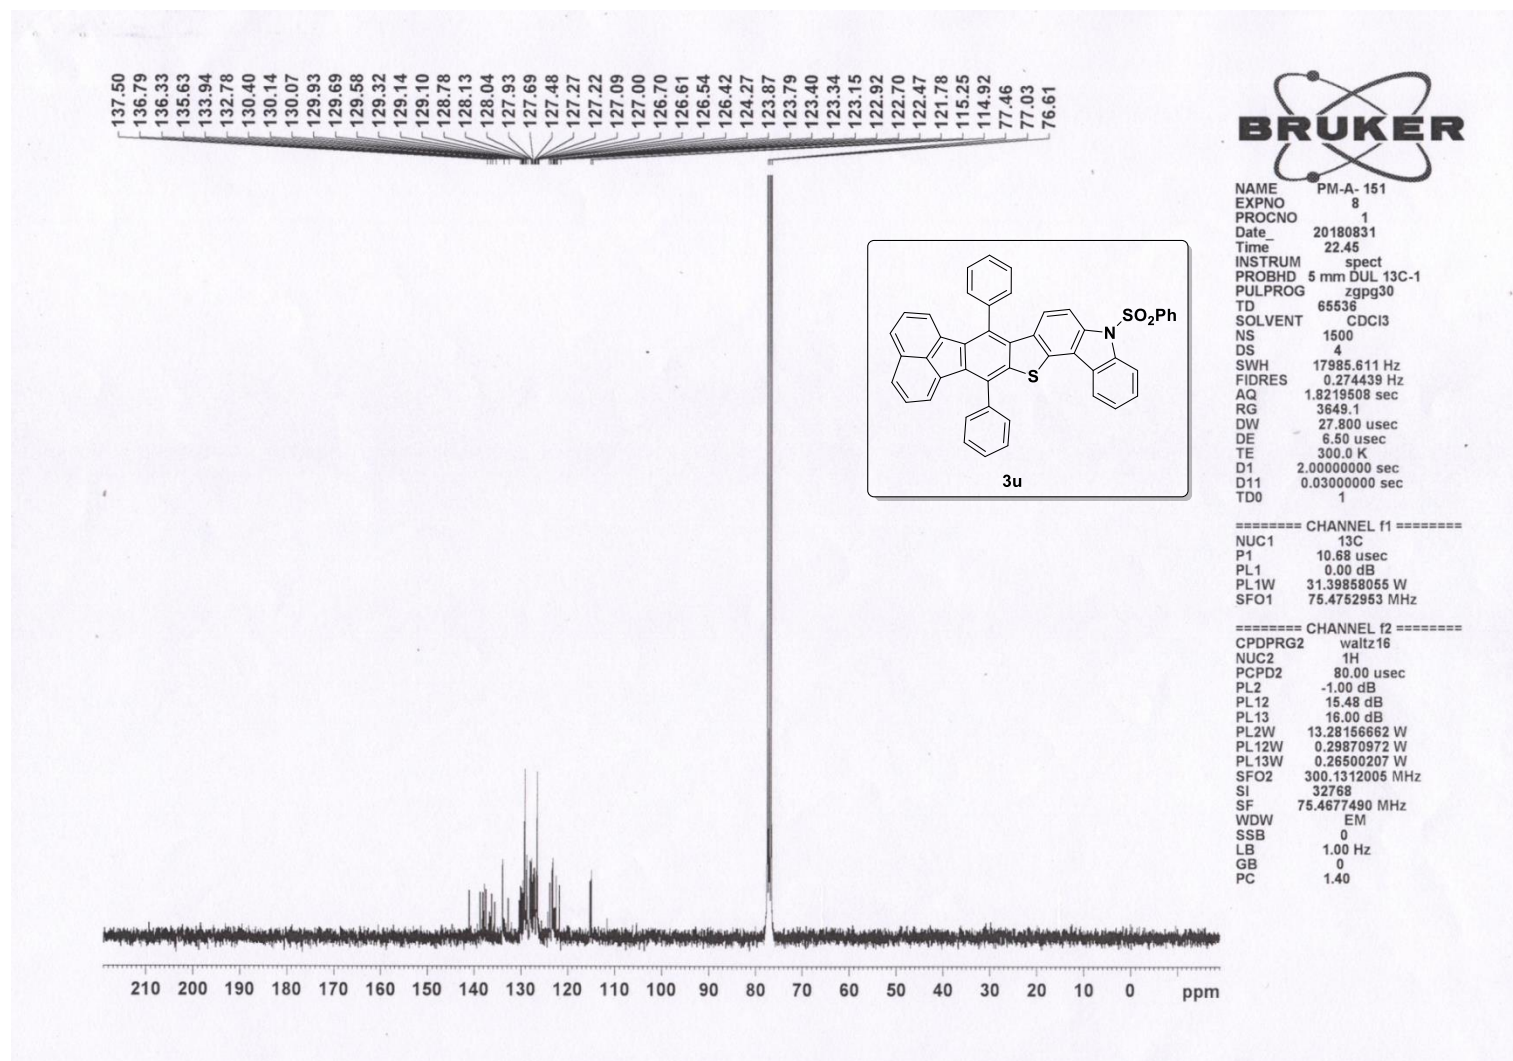

$^{13}\text{C}$ -NMR (75 MHz,  $\text{CDCl}_3$ ) spectrum of compound **3u**



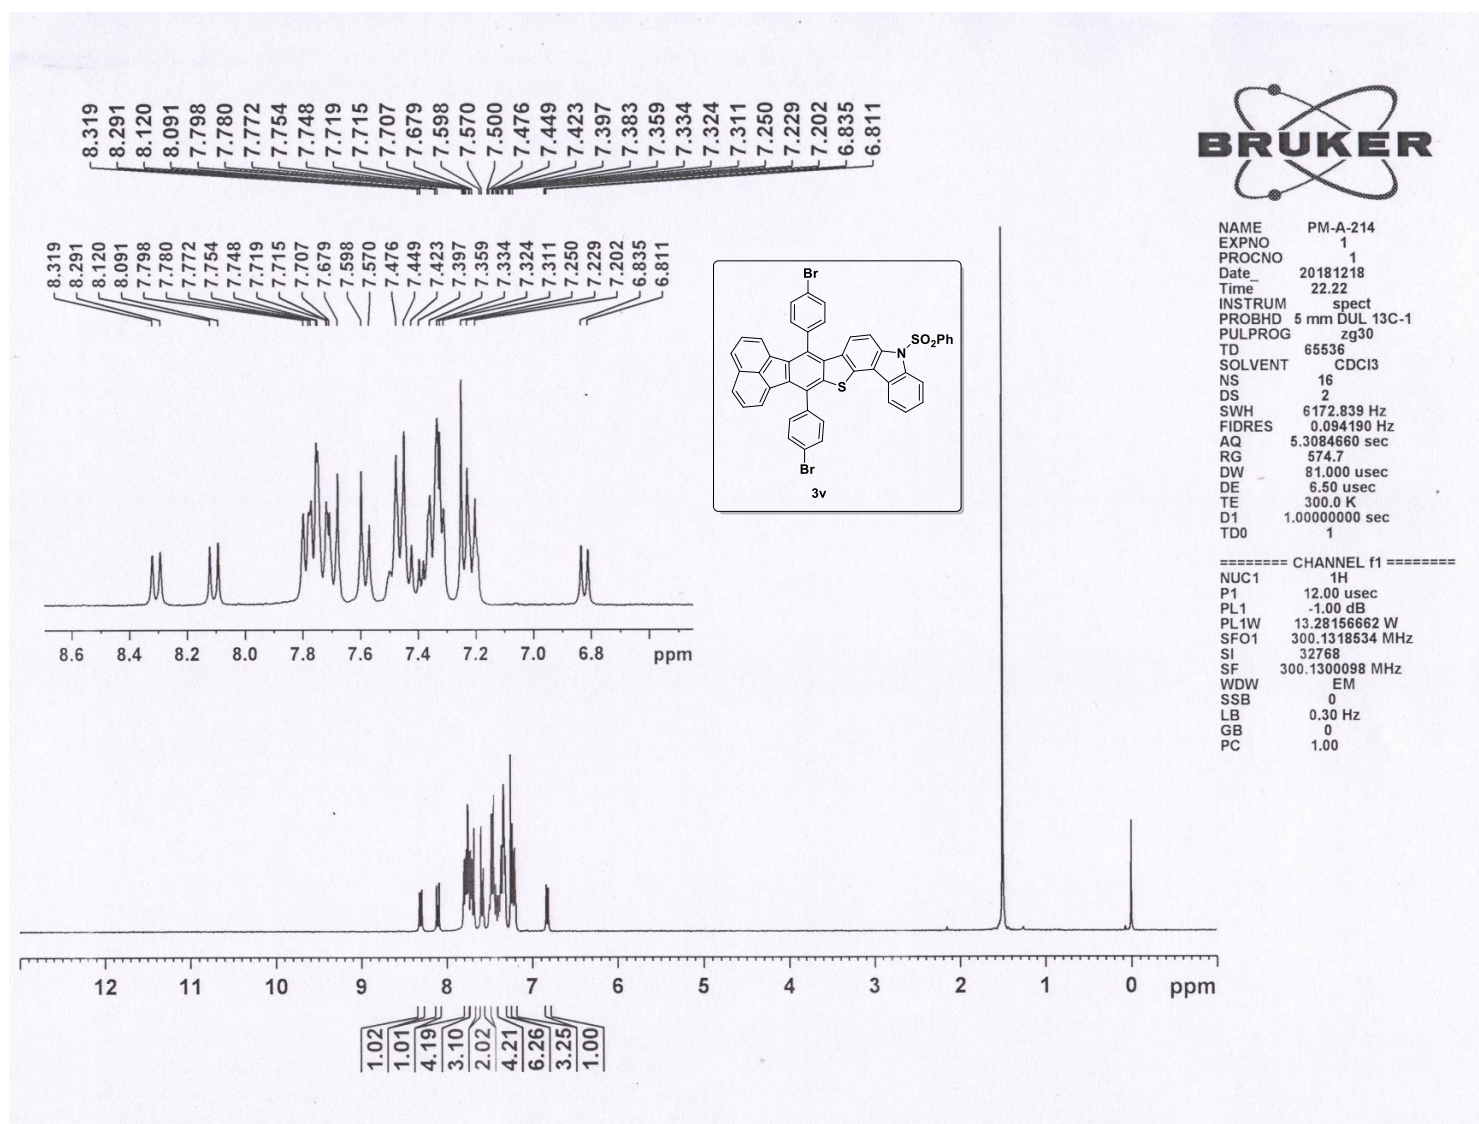

**<sup>1</sup>H-NMR (300 MHz, CDCl<sub>3</sub>) spectrum of compound **3v****



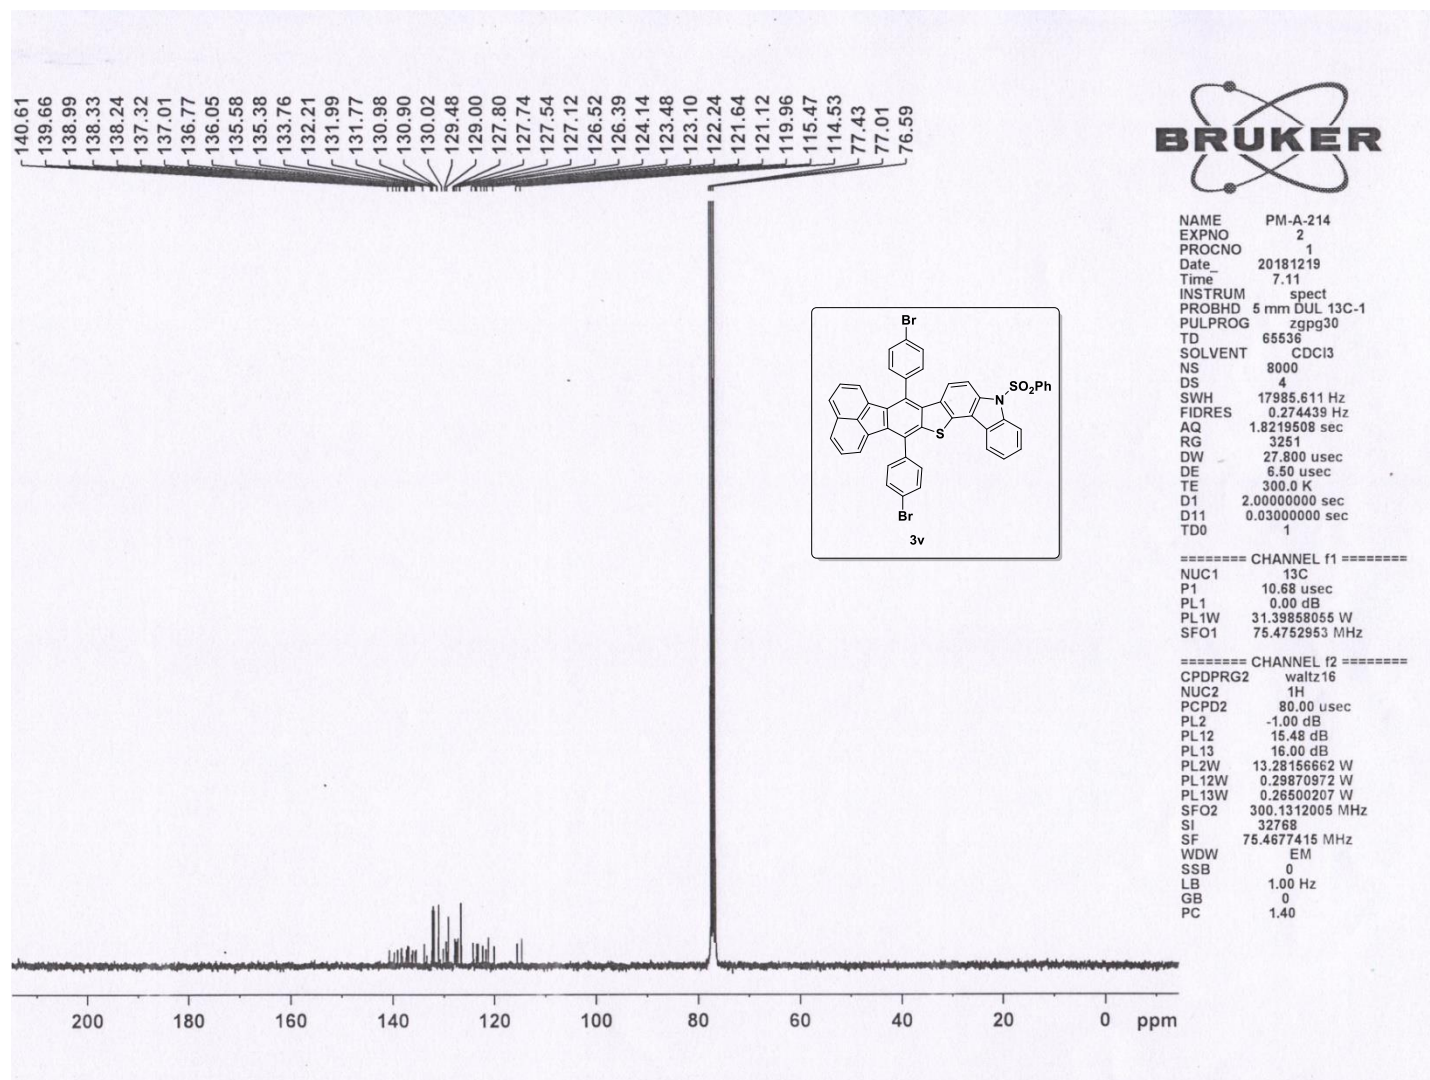

$^{13}\text{C}$ -NMR (75 MHz,  $\text{CDCl}_3$ ) spectrum of compound **3v**

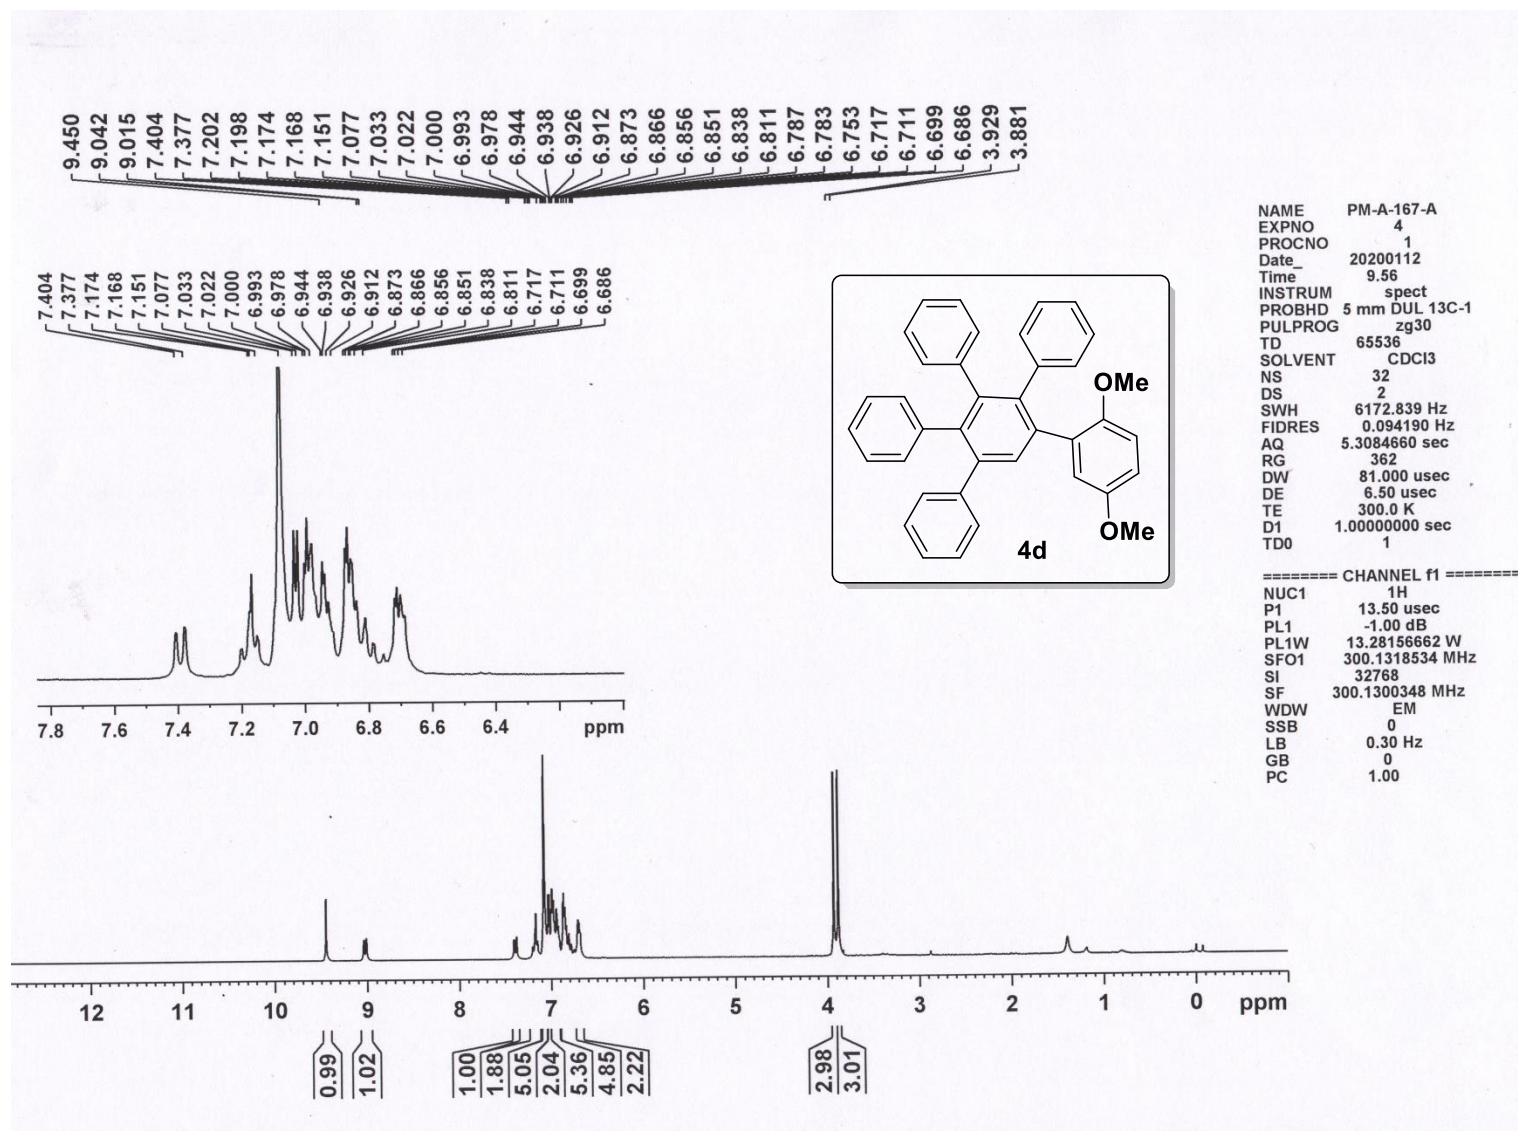

<sup>1</sup>H-NMR (300 MHz, CDCl<sub>3</sub>) spectrum of compound **4d**

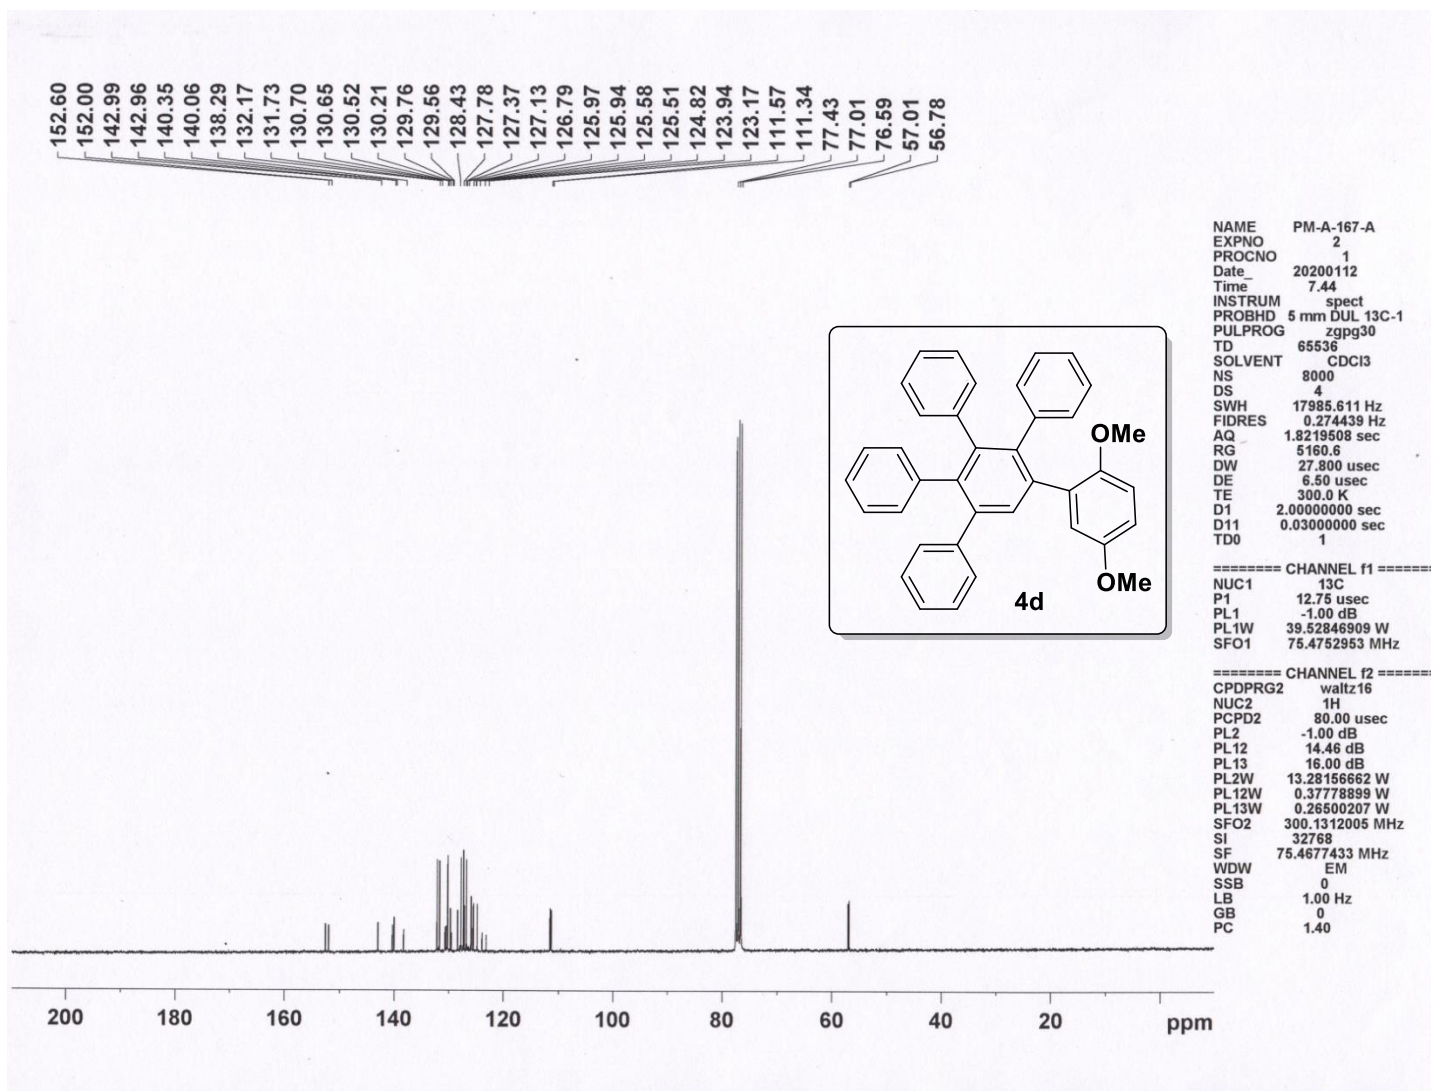

<sup>13</sup>C-NMR (75 MHz, CDCl<sub>3</sub>) spectrum of compound **4d**



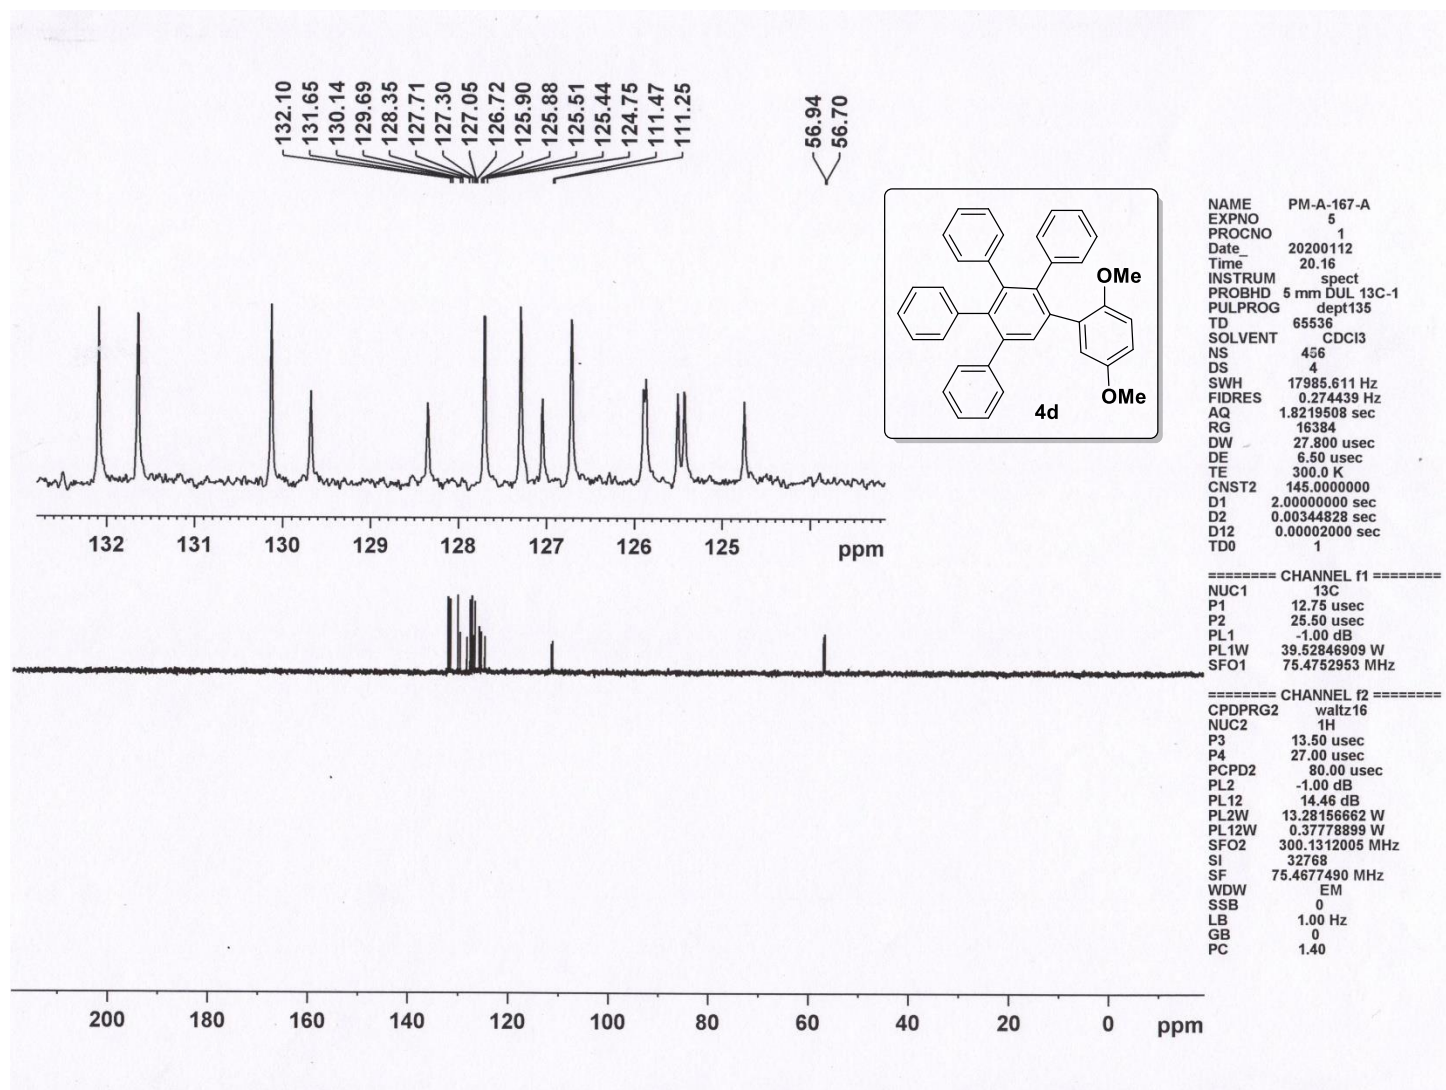

DEPT-135 (75 MHz,  $\text{CDCl}_3$ ) NMR spectrum of **4d**

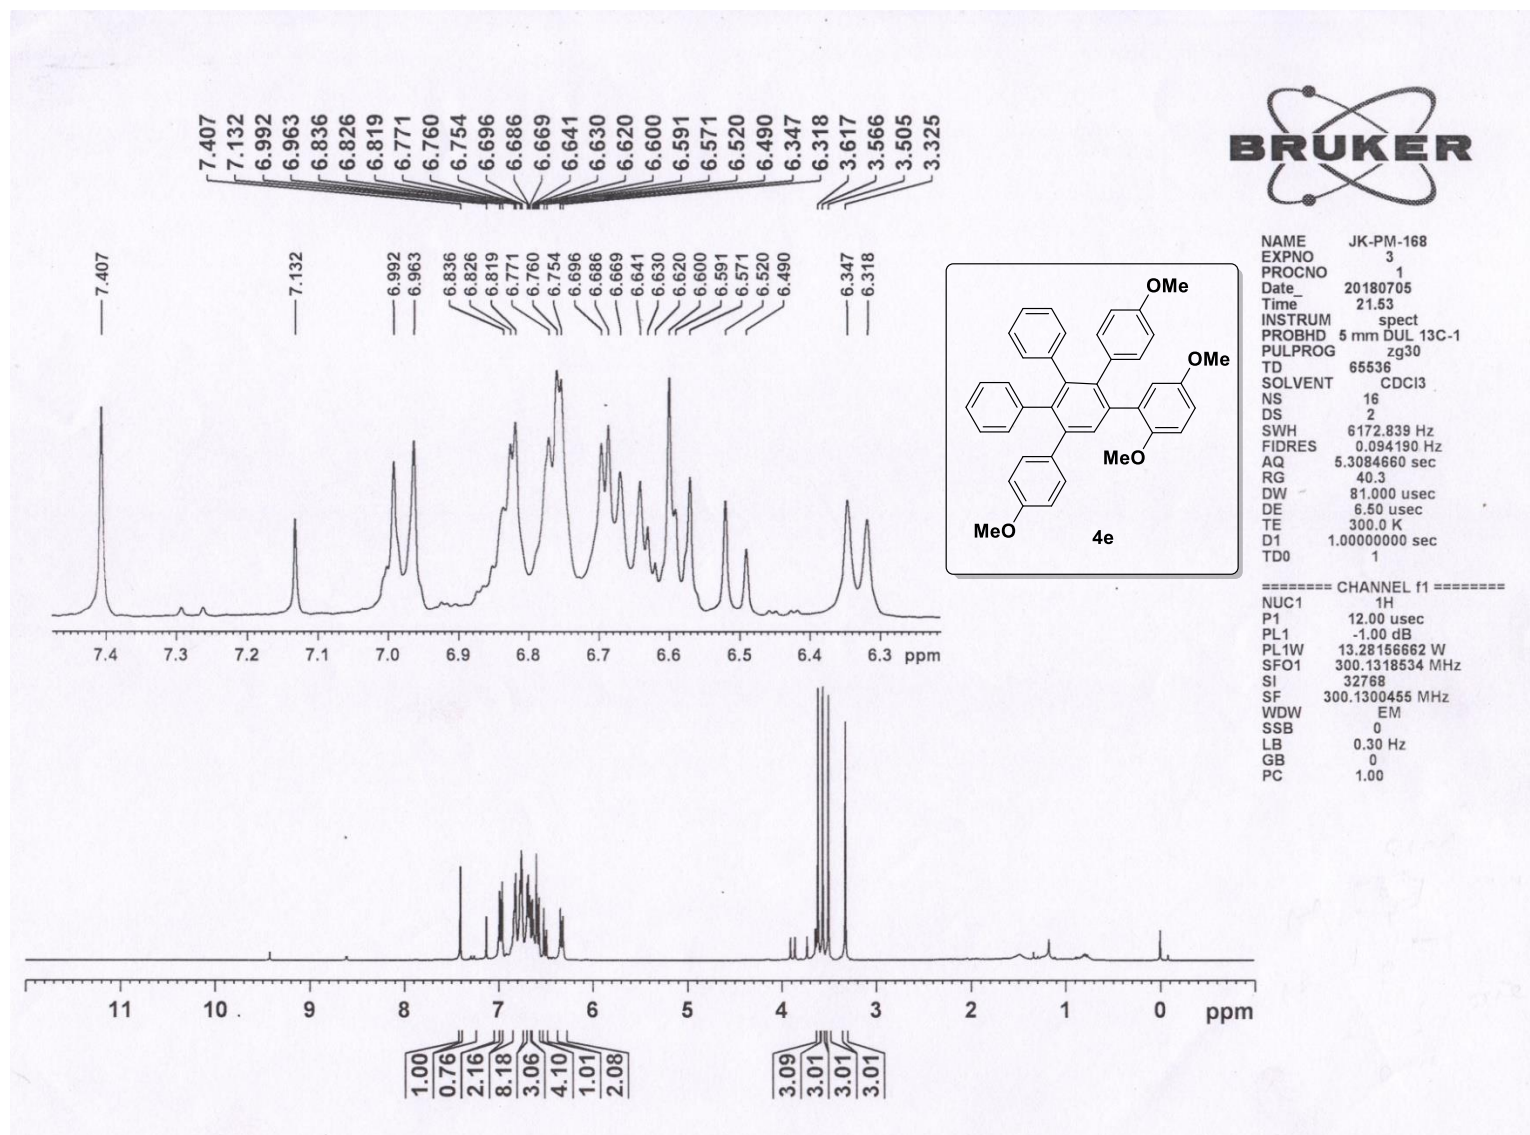

<sup>1</sup>H-NMR (300 MHz, CDCl<sub>3</sub>) spectrum of compound **4e**



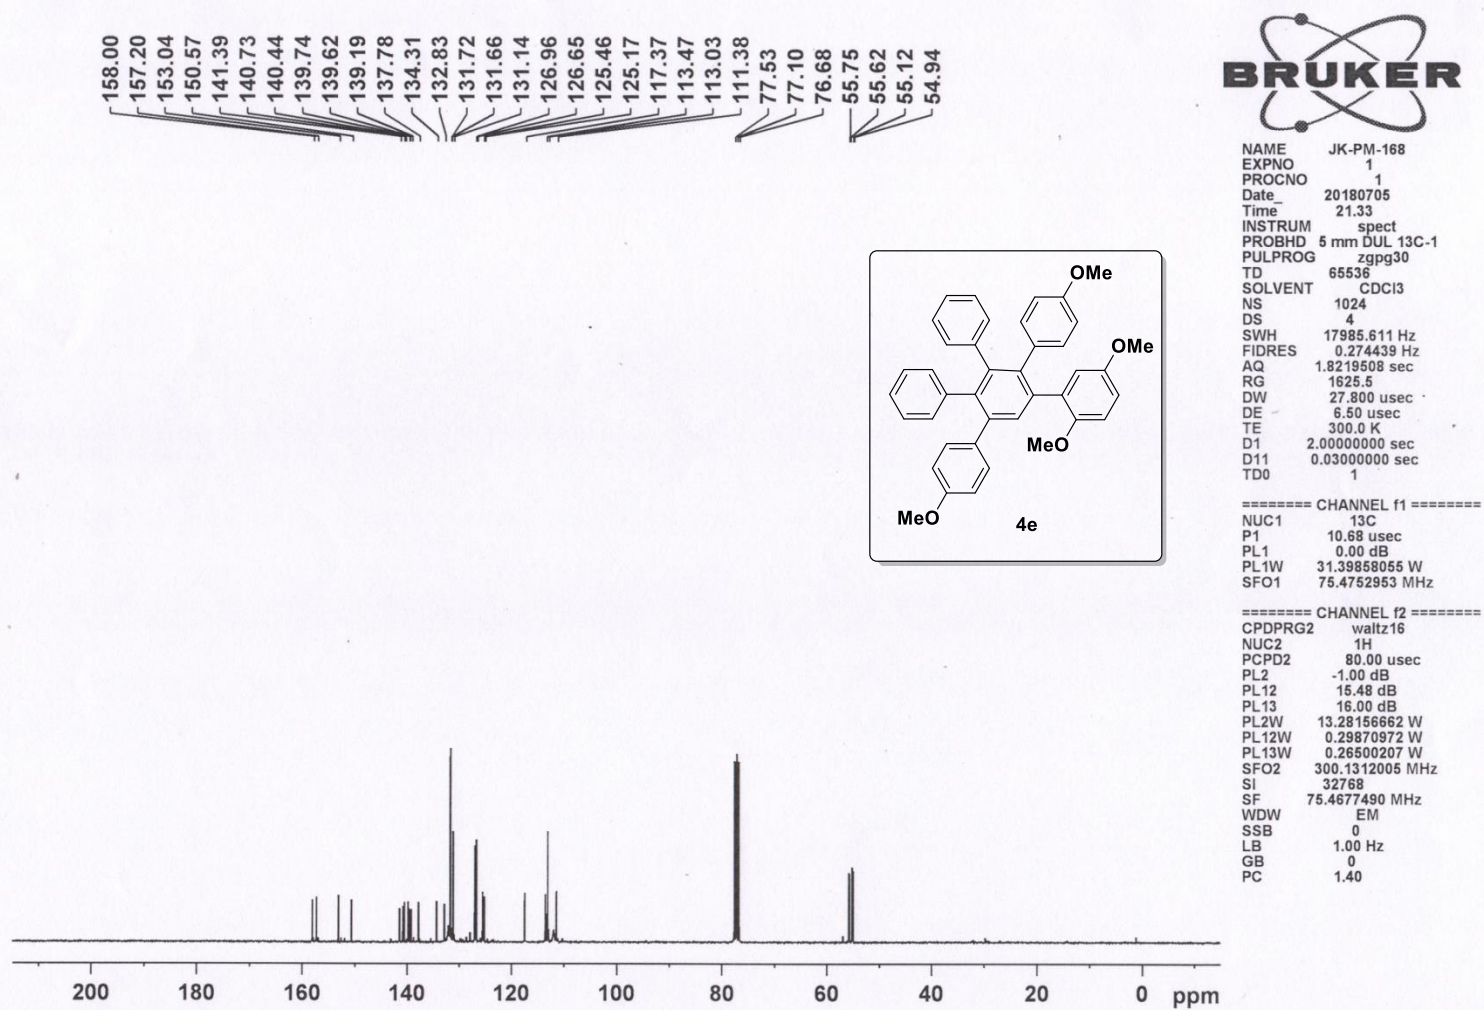

$^{13}\text{C}$ -NMR (75 MHz,  $\text{CDCl}_3$ ) spectrum of compound **4e**

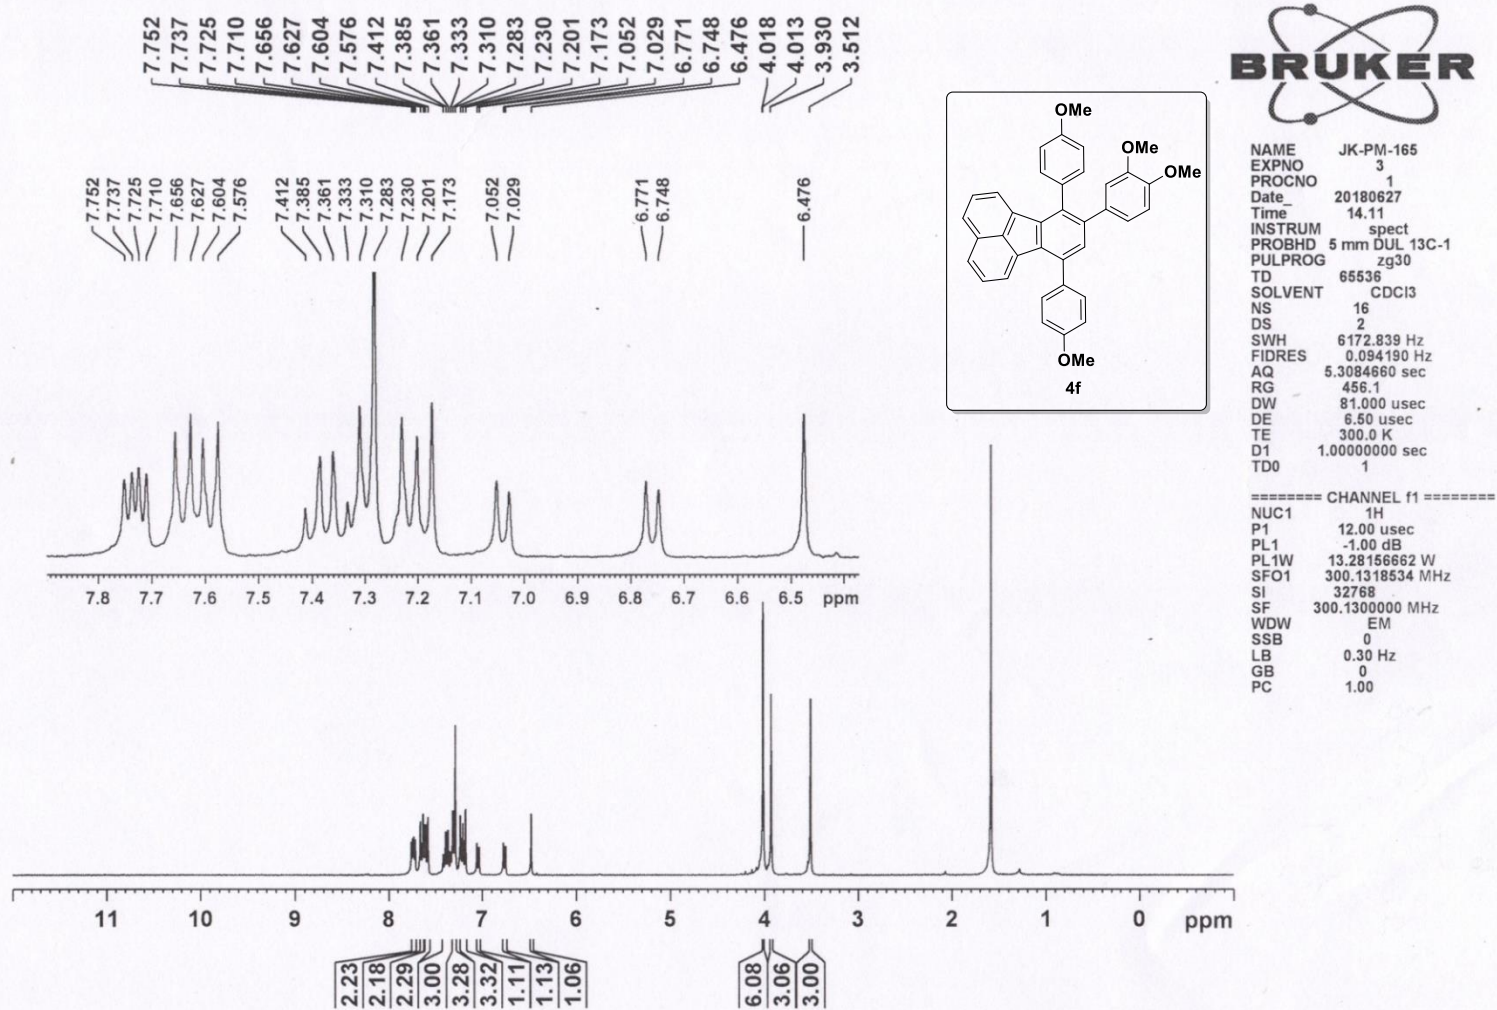

<sup>1</sup>H-NMR (300 MHz, CDCl<sub>3</sub>) spectrum of compound **4f**

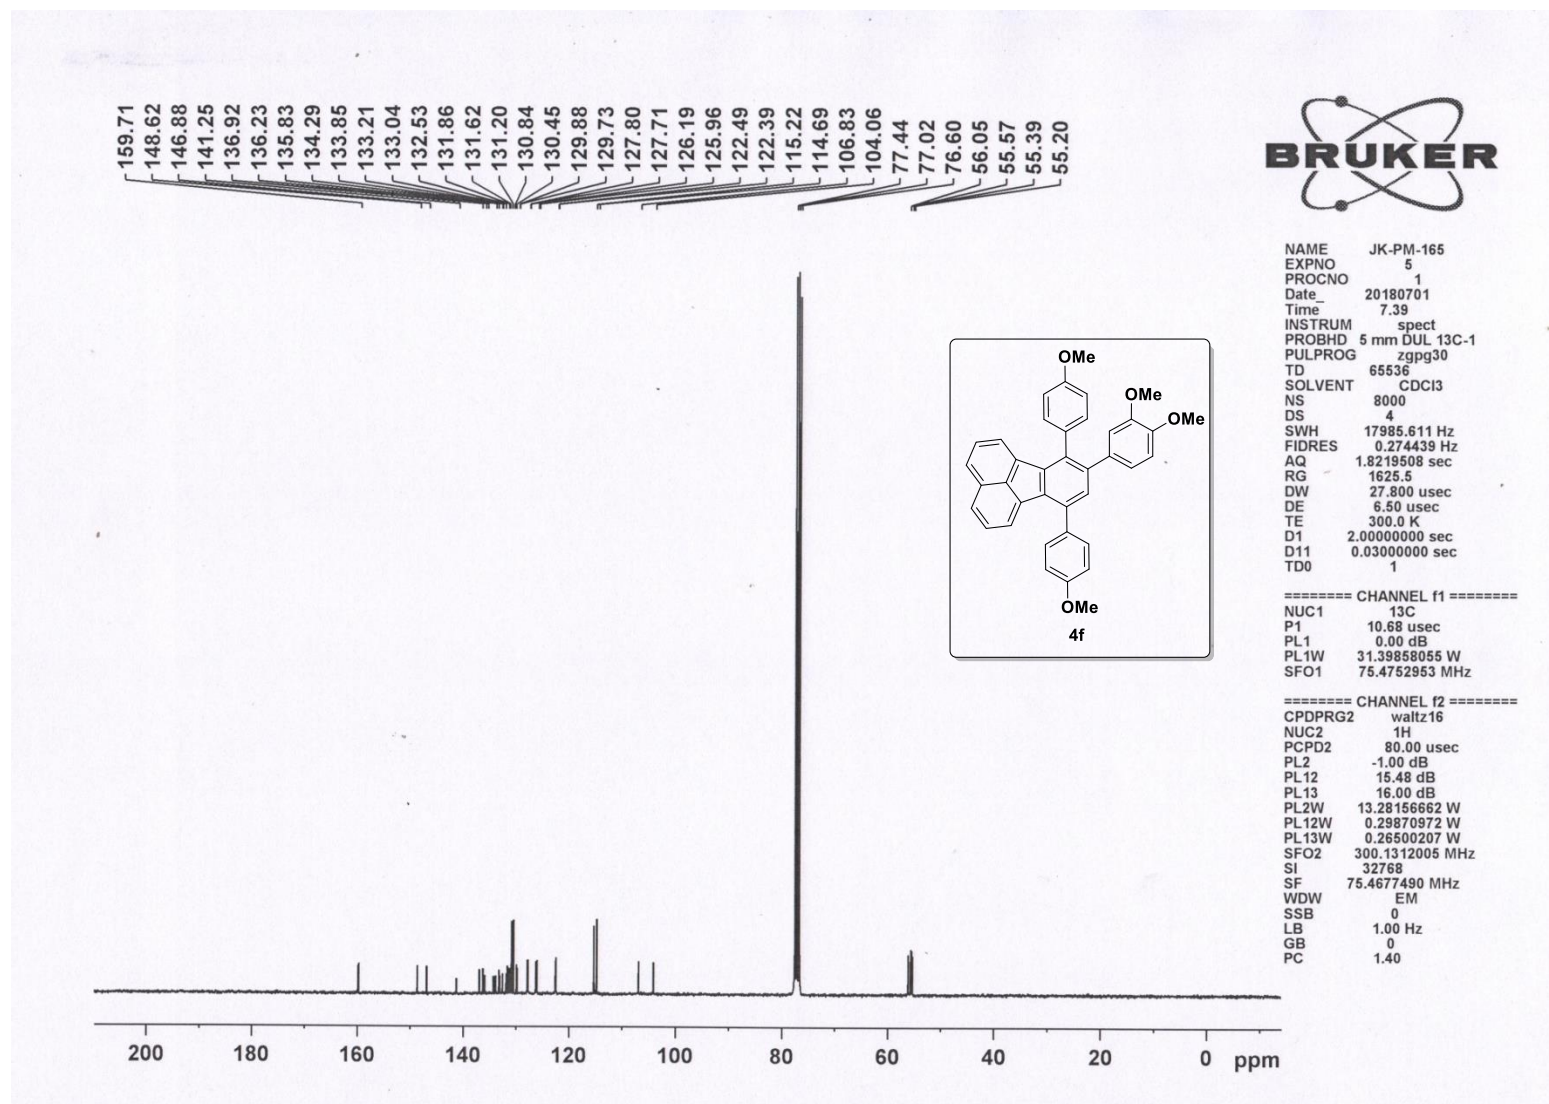

$^{13}\text{C}$ -NMR (75 MHz,  $\text{CDCl}_3$ ) spectrum of compound **4f**



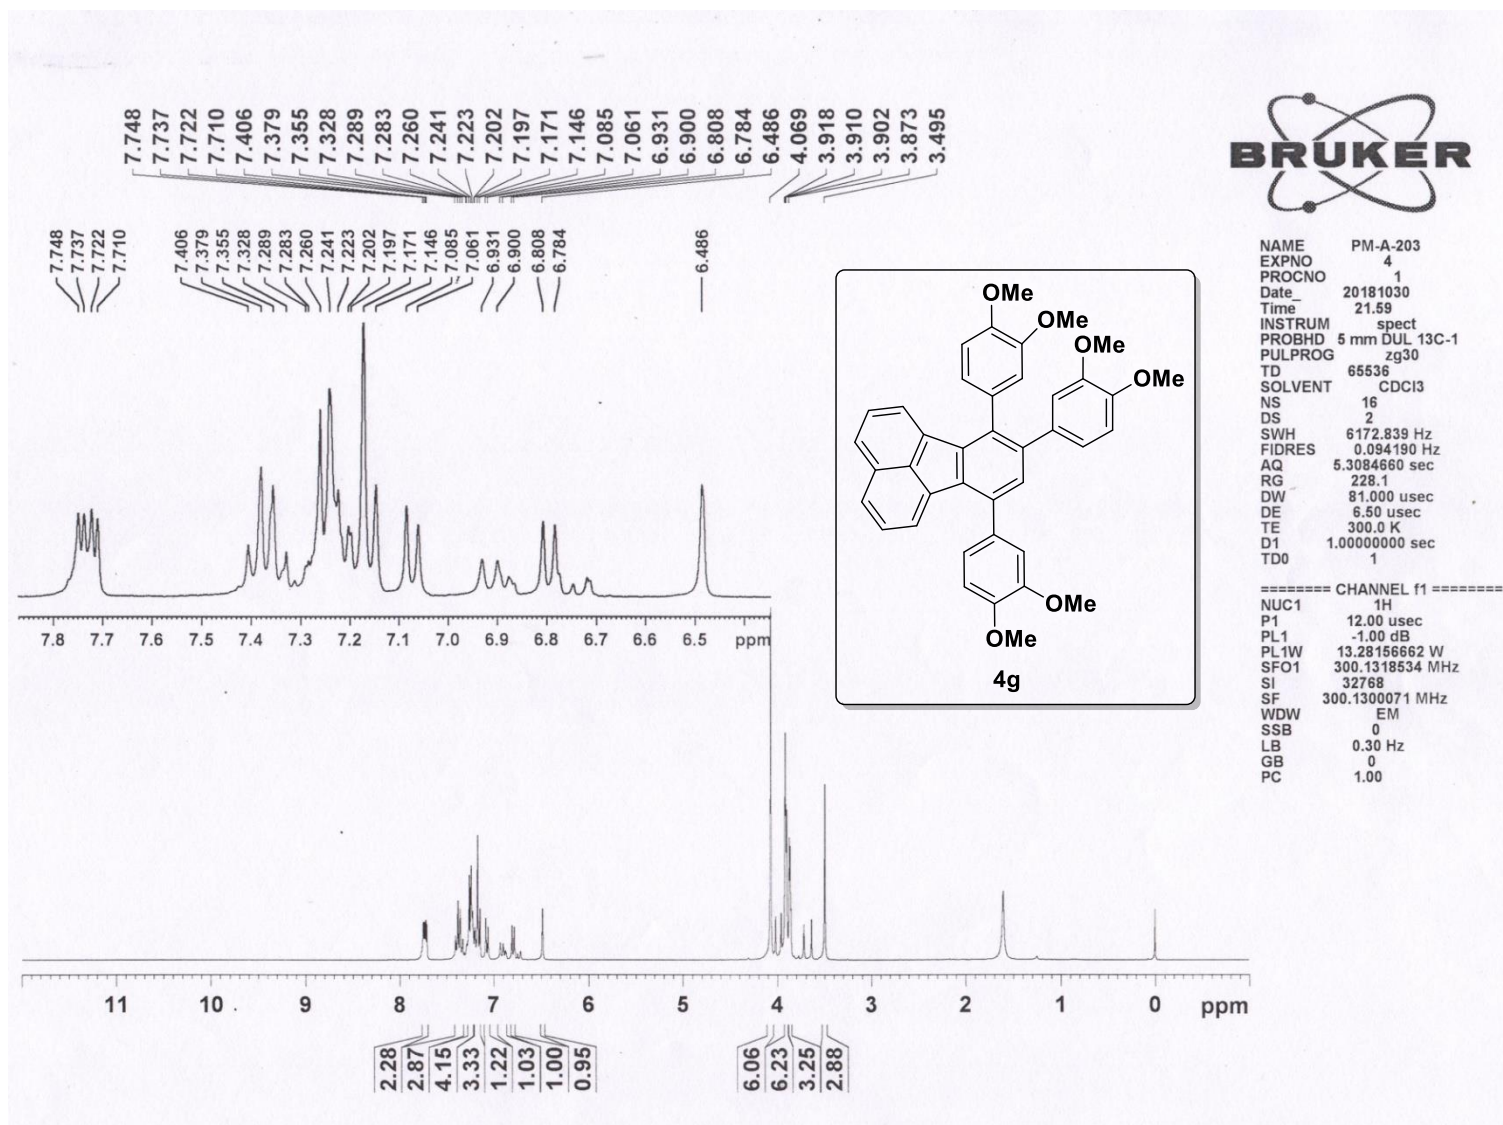

<sup>1</sup>H-NMR (300 MHz, CDCl<sub>3</sub>) spectrum of compound **4g**

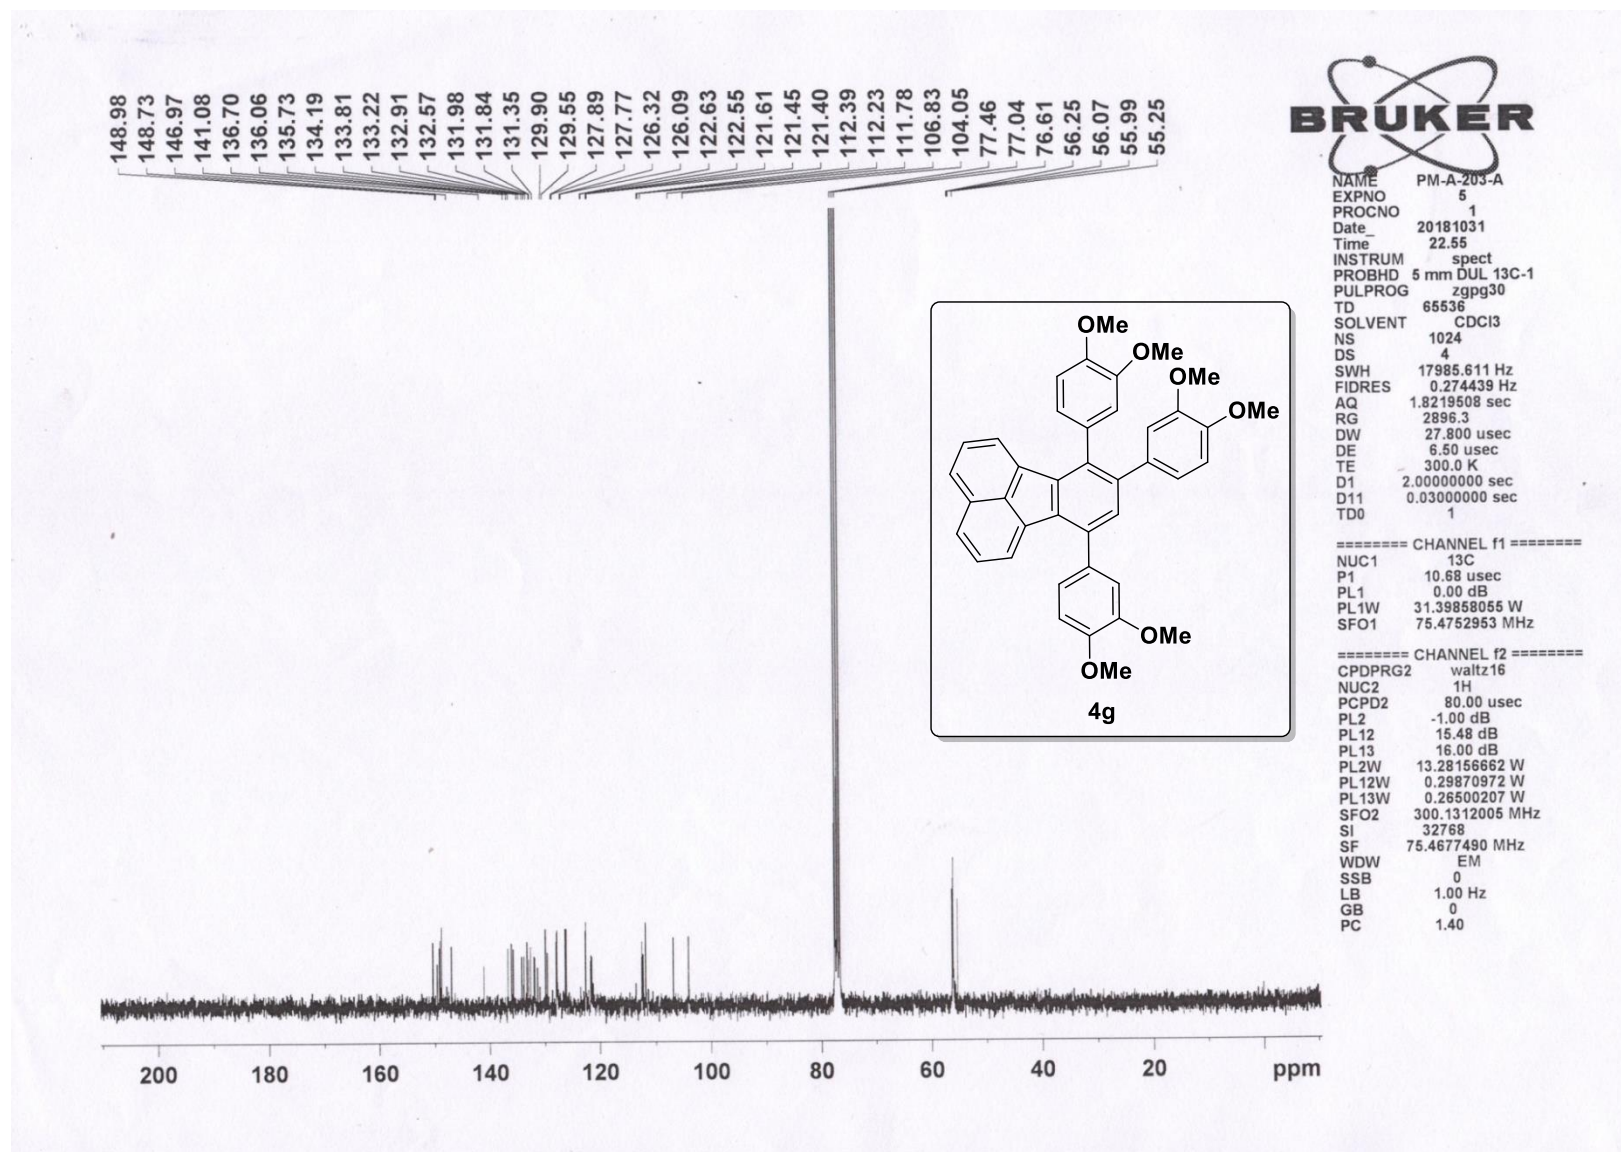

<sup>13</sup>C-NMR (75 MHz, CDCl<sub>3</sub>) spectrum of compound **4g**



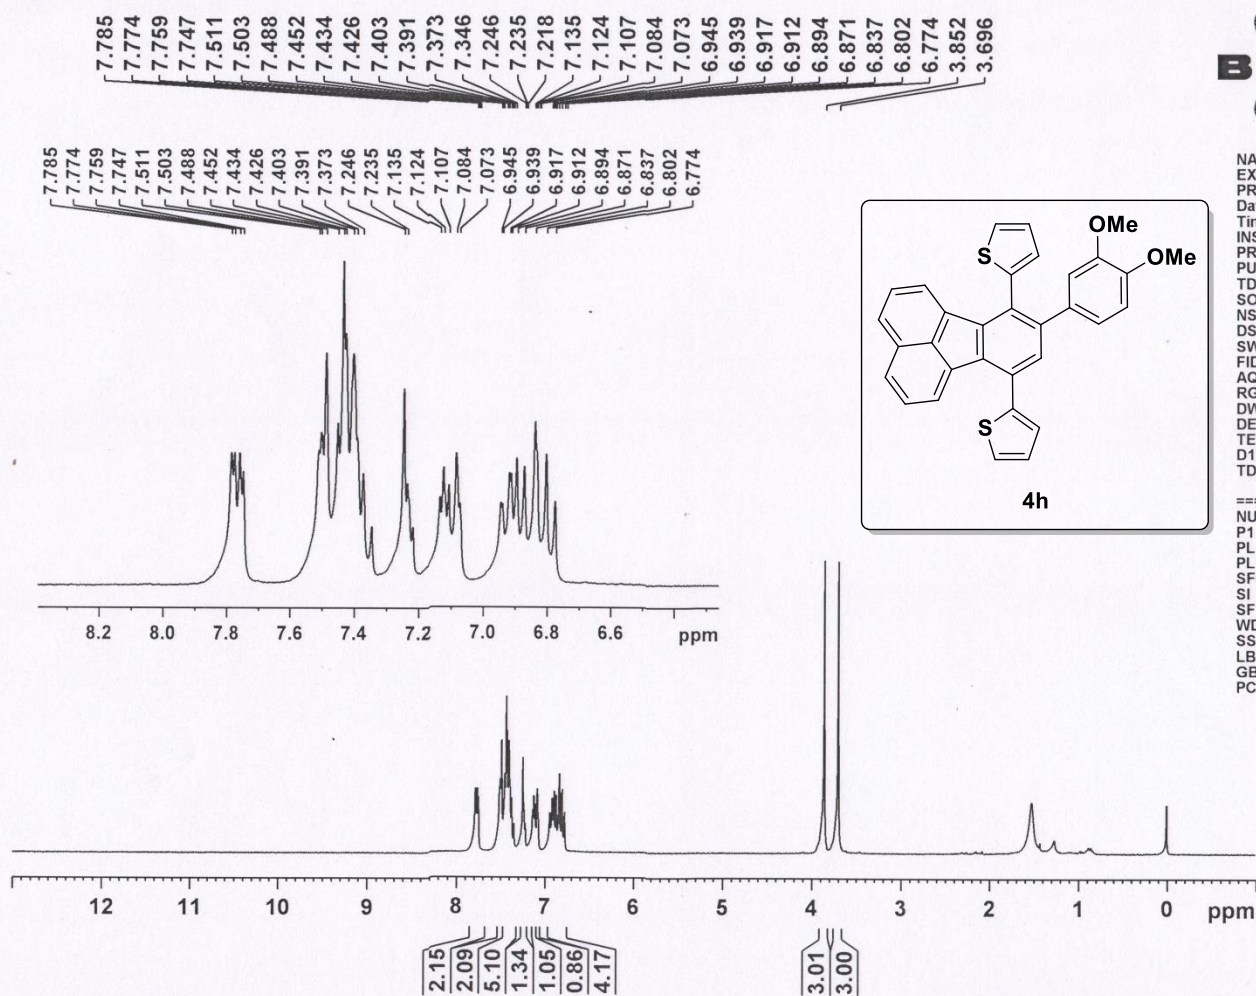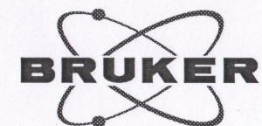

NAME PM-A-191  
 EXPNO 1  
 PROCNO 1  
 Date\_ 20190725  
 Time 11.27  
 INSTRUM spect  
 PROBHD 5 mm DUL 13C-1  
 PULPROG zg30  
 TD 65536  
 SOLVENT CDCl3  
 NS 16  
 DS 2  
 SWH 6172.839 Hz  
 FIDRES 0.094190 Hz  
 AQ 5.3084660 sec  
 RG 322.5  
 DW 81.000 usec  
 DE 6.50 usec  
 TE 300.0 K  
 D1 1.00000000 sec  
 TD0 1

===== CHANNEL f1 =====  
 NUC1 1H  
 P1 12.00 usec  
 PL1 -1.00 dB  
 PL1W 13.28156662 W  
 SFO1 300.1318534 MHz  
 SI 32768  
 SF 300.1300110 MHz  
 WDW EM  
 SSB 0  
 LB 0.30 Hz  
 GB 0  
 PC 1.00

<sup>1</sup>H-NMR (300 MHz, CDCl<sub>3</sub>) spectrum of compound **4h**

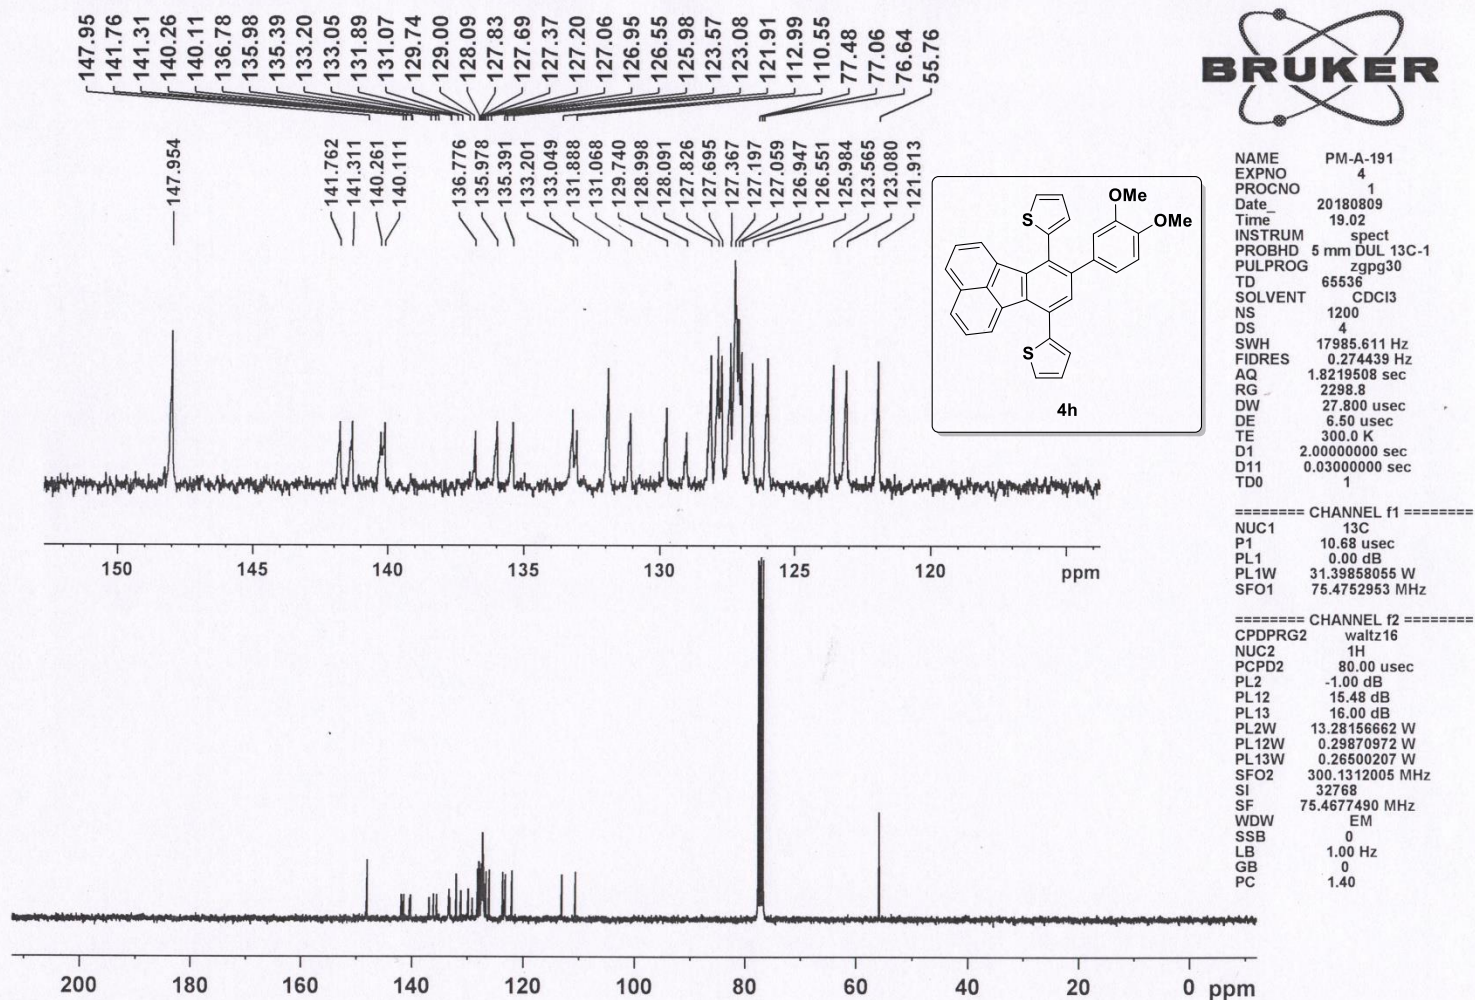

$^{13}\text{C}$ -NMR (75 MHz,  $\text{CDCl}_3$ ) spectrum of compound **4h**



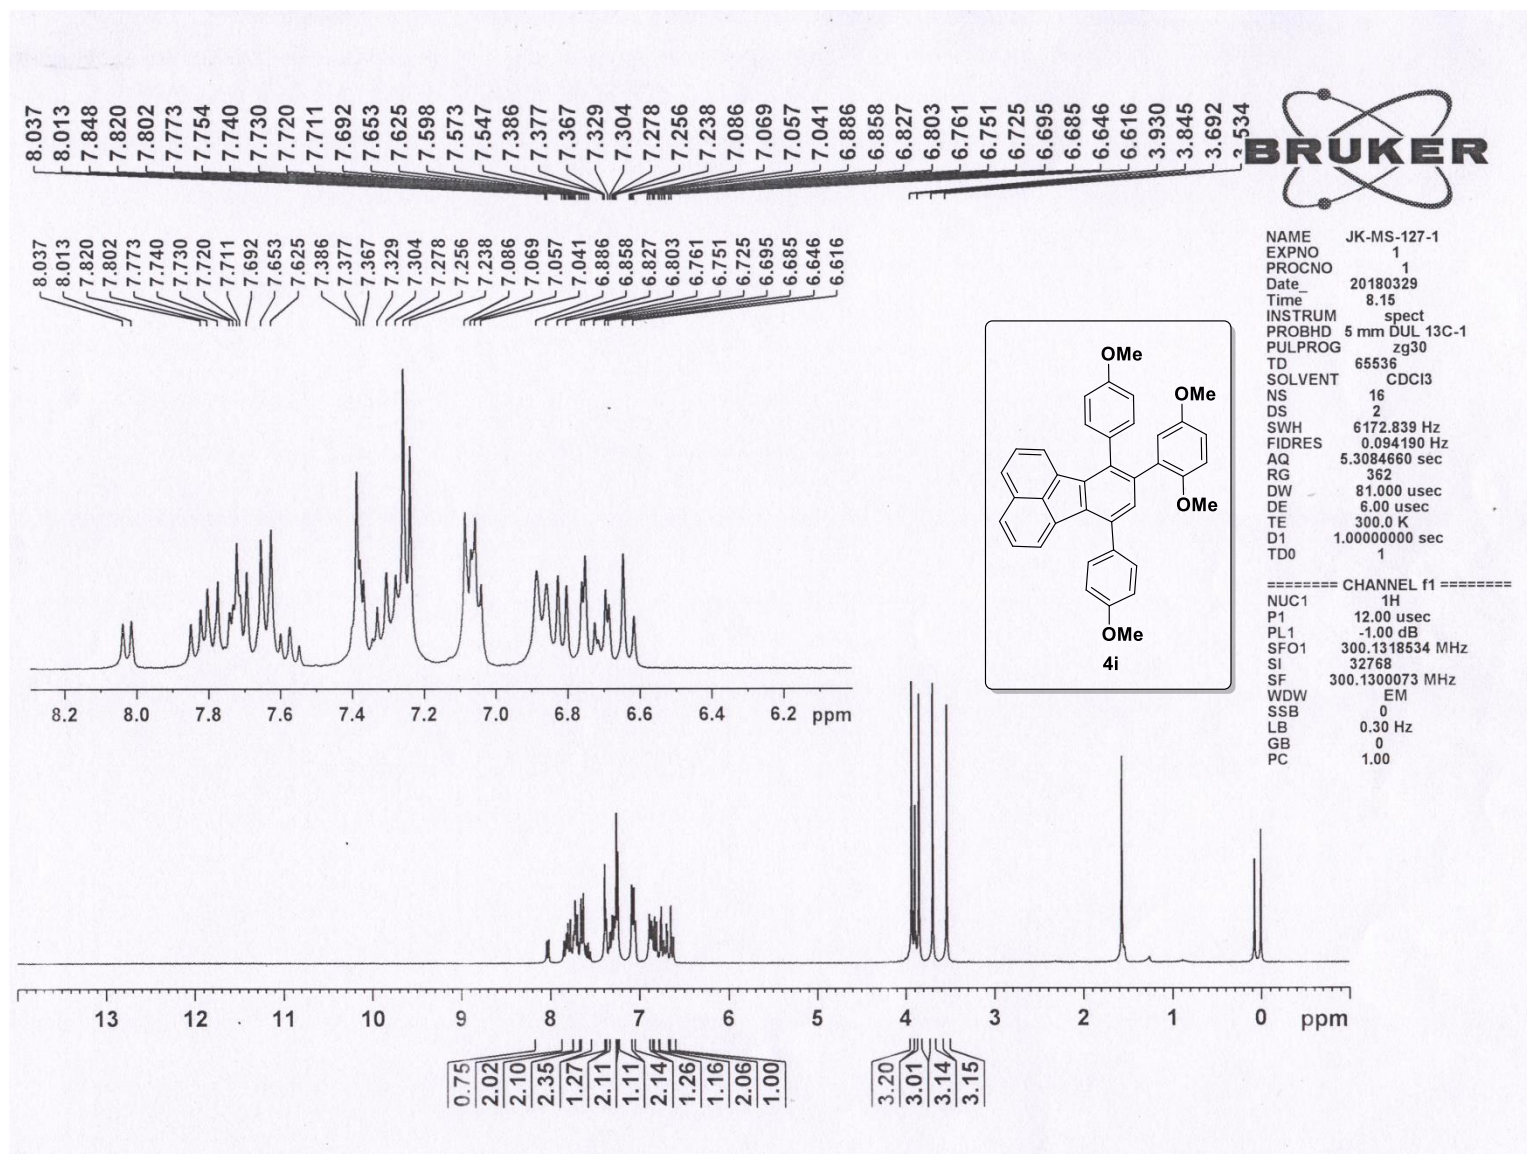

<sup>1</sup>H-NMR (300 MHz, CDCl<sub>3</sub>) spectrum of compound **4i**

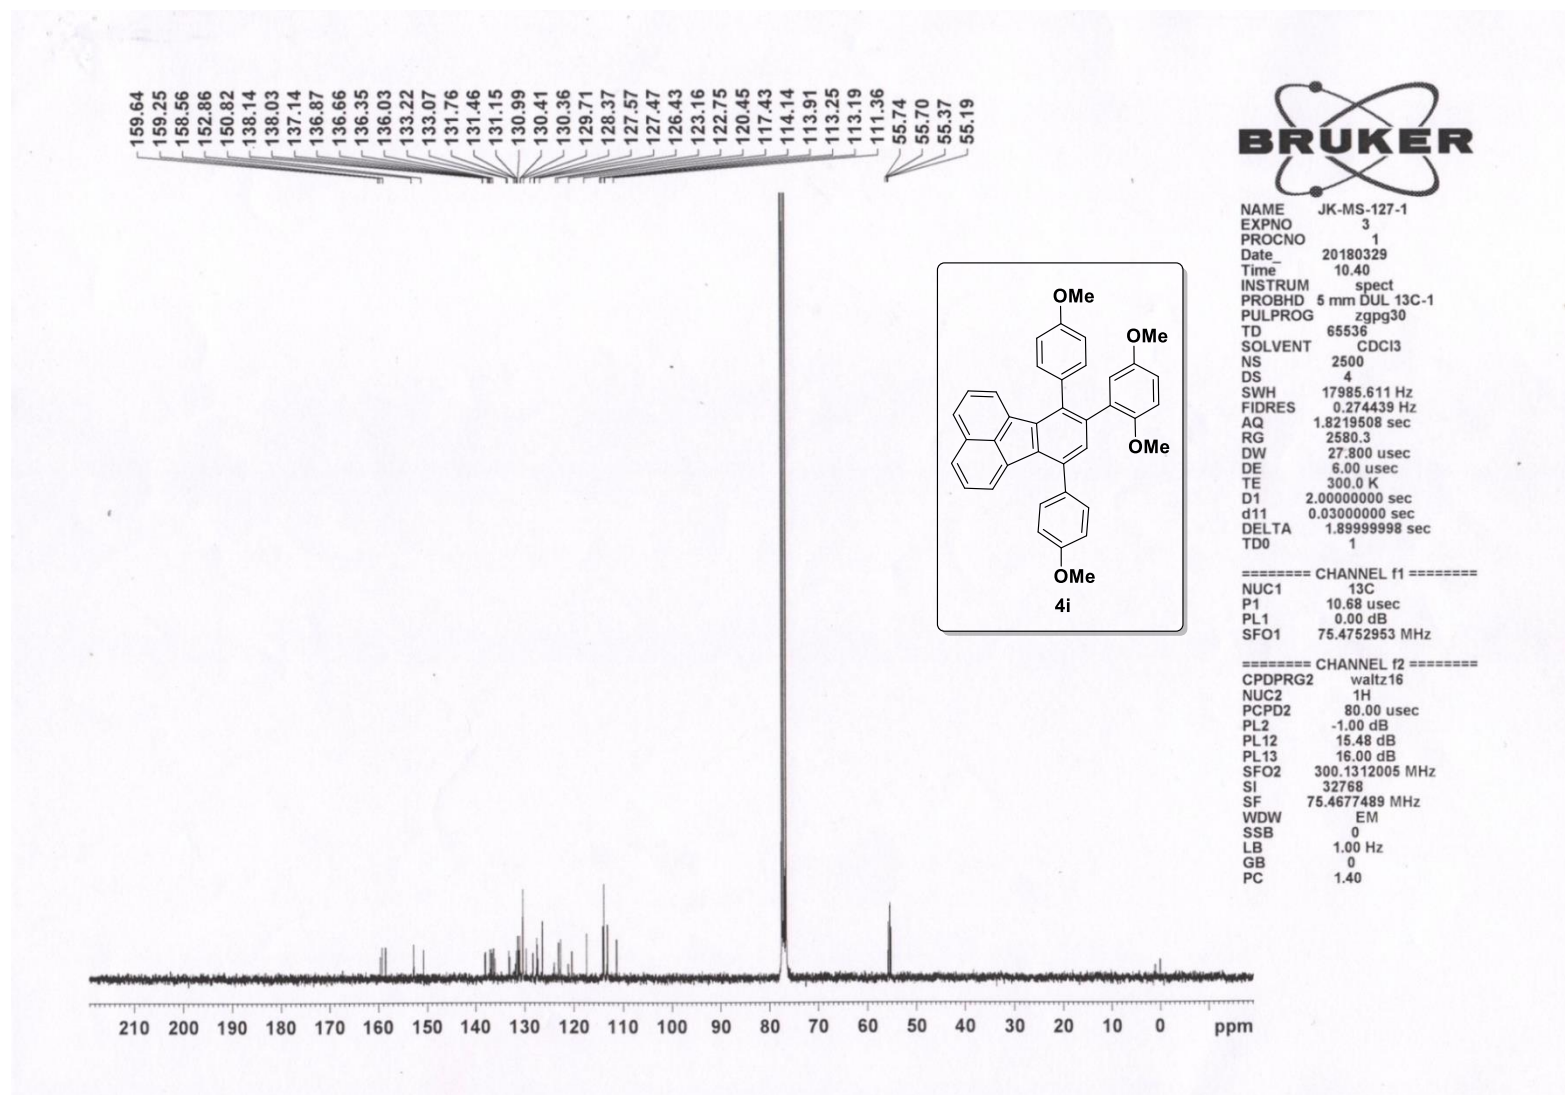

$^{13}\text{C}$ -NMR (75 MHz,  $\text{CDCl}_3$ ) spectrum of compound **4i**

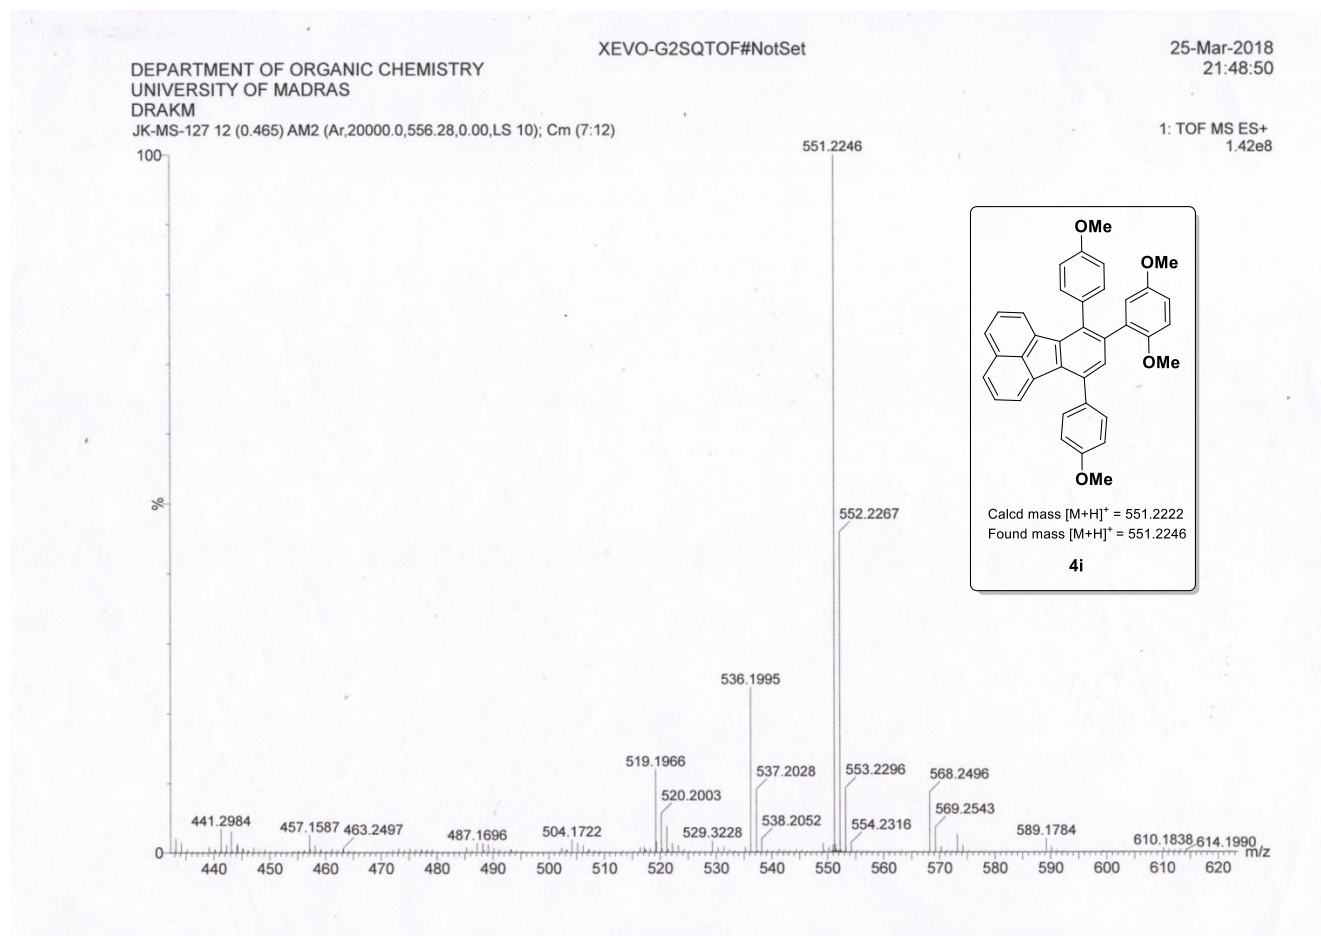

HRMS spectrum of compound **4i**





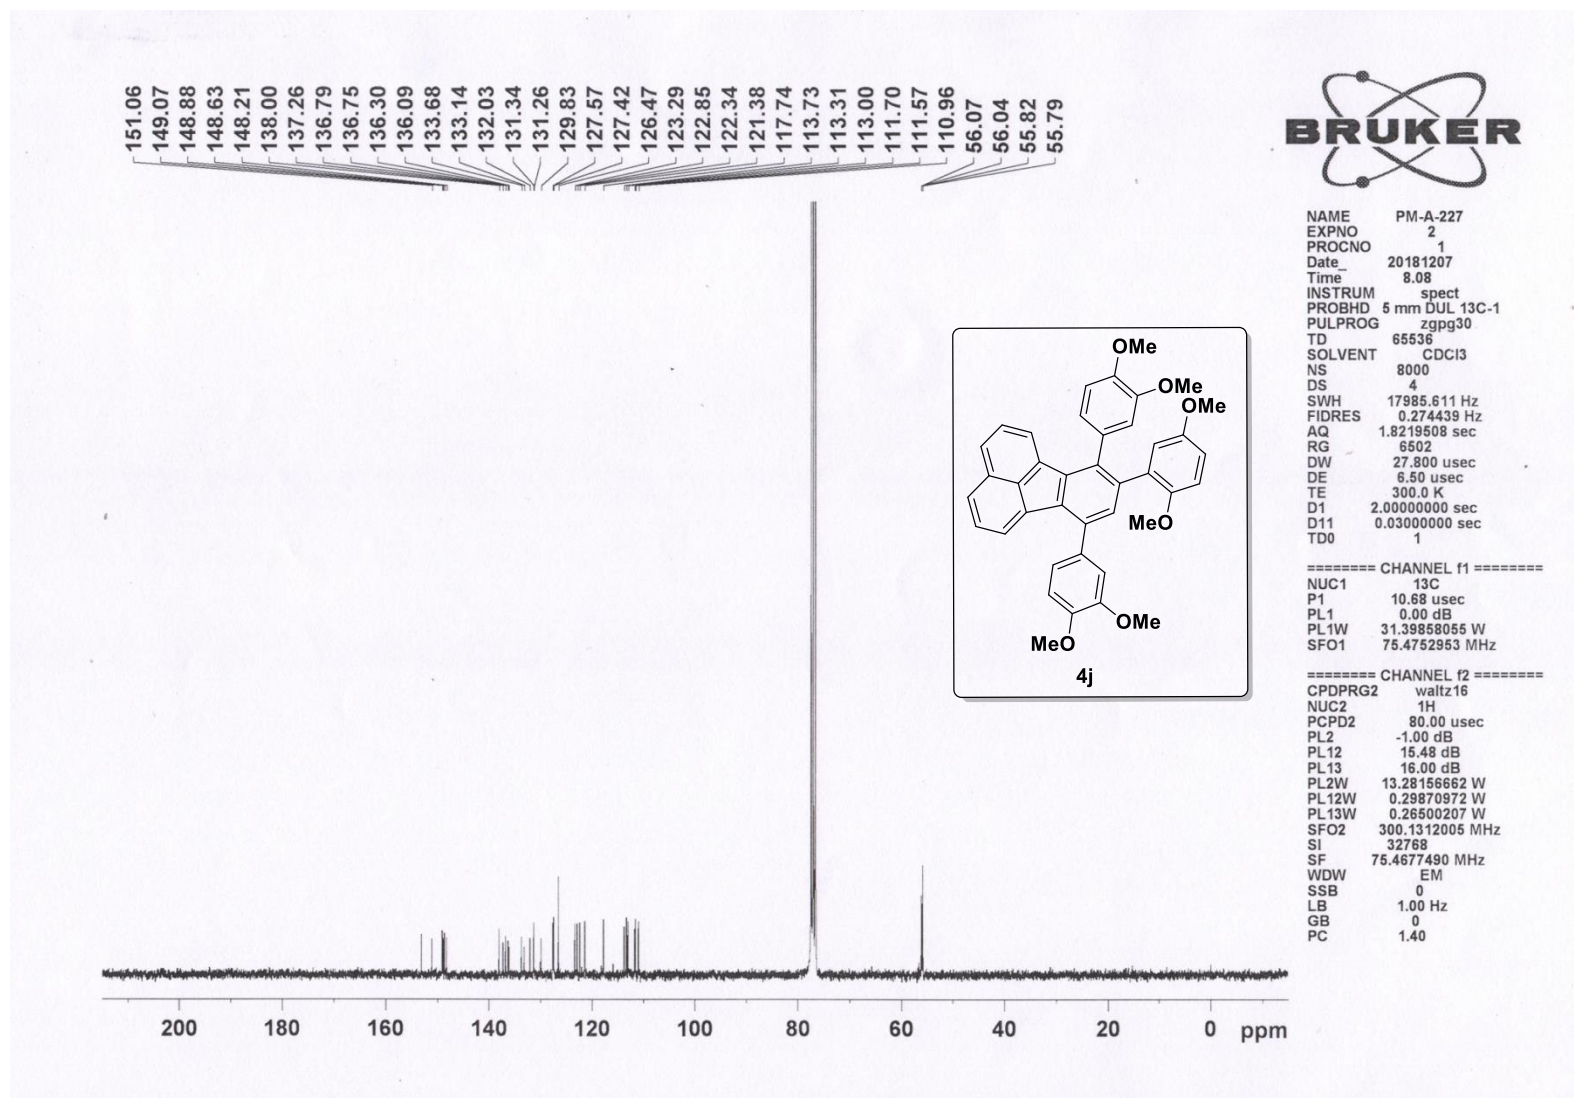

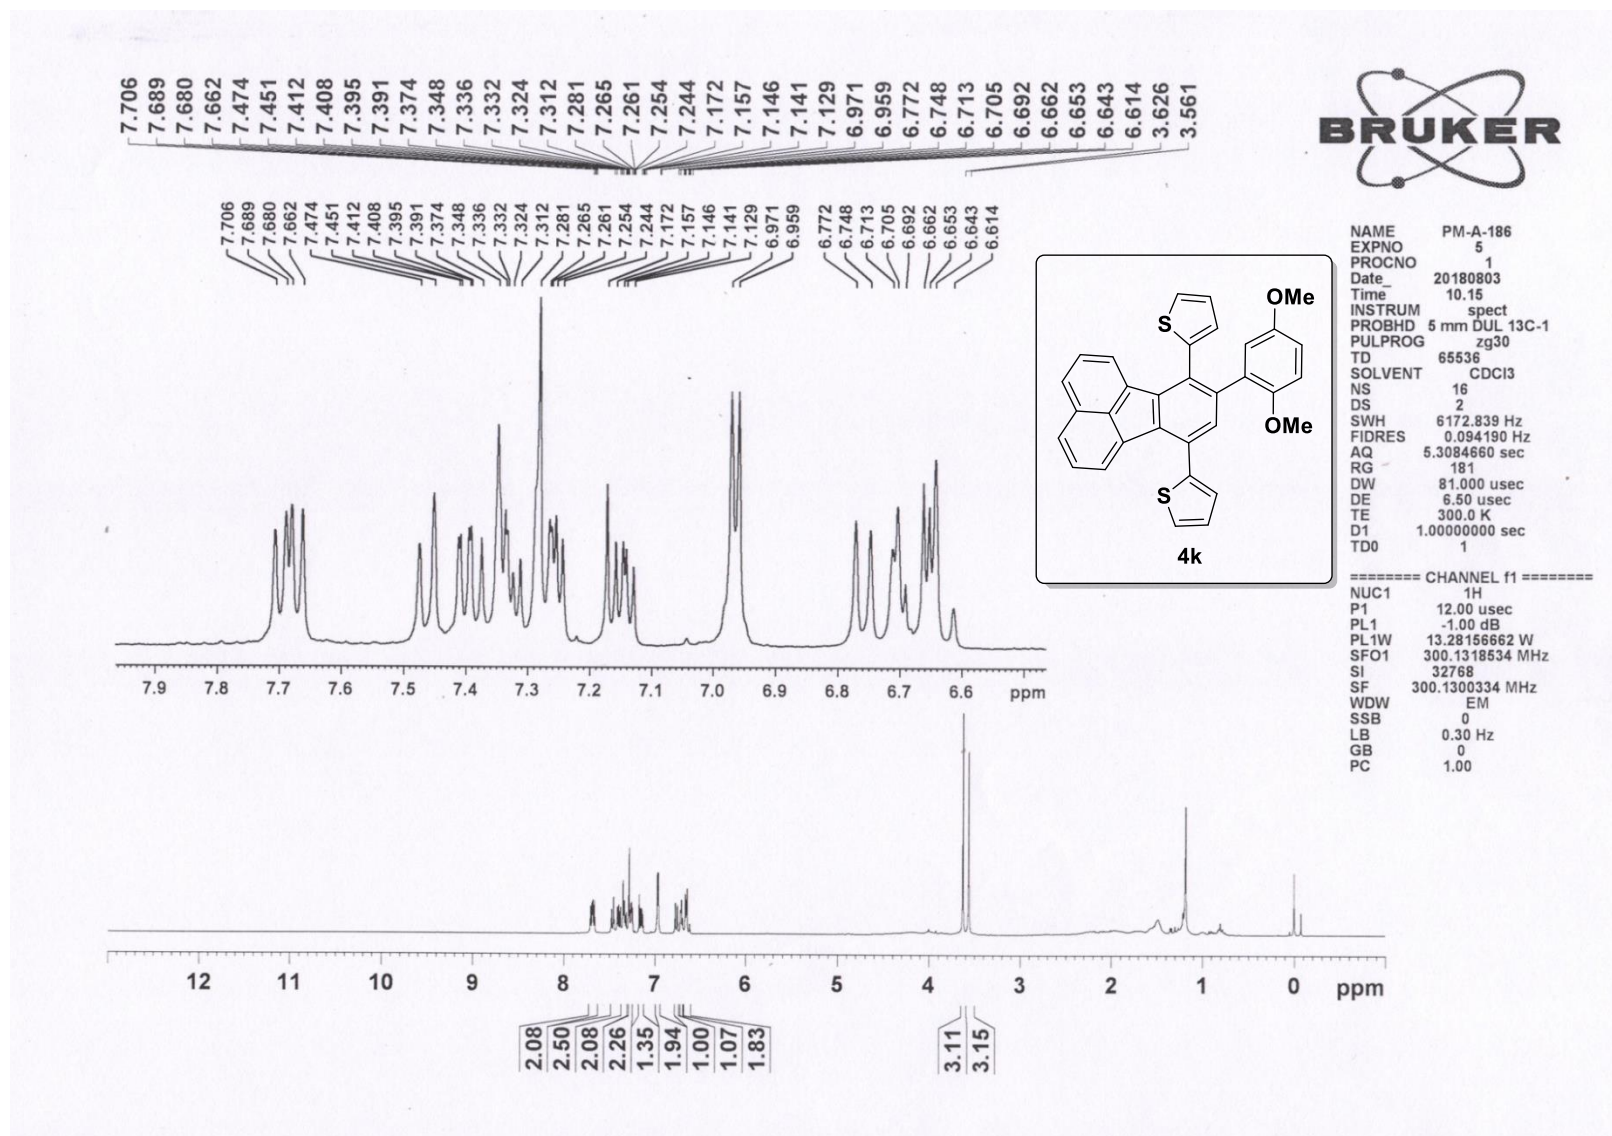

<sup>1</sup>H-NMR (300 MHz, CDCl<sub>3</sub>) spectrum of compound **4k**



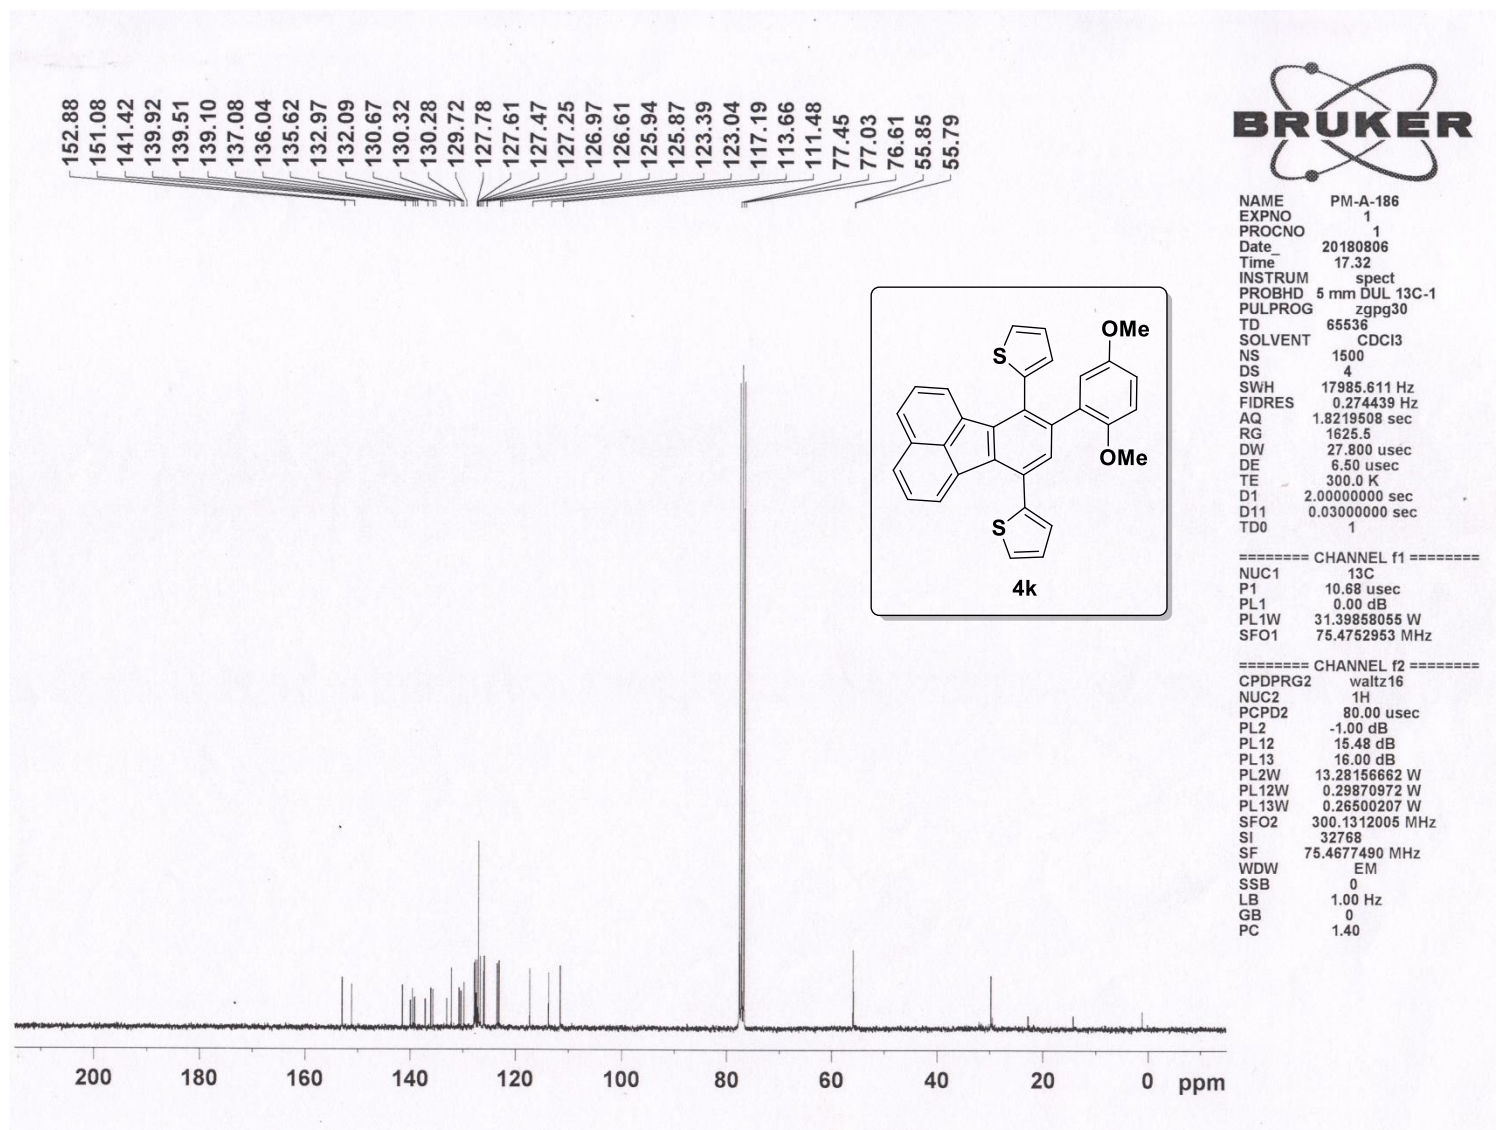

<sup>13</sup>C-NMR (75 MHz, CDCl<sub>3</sub>) spectrum of compound **4k**

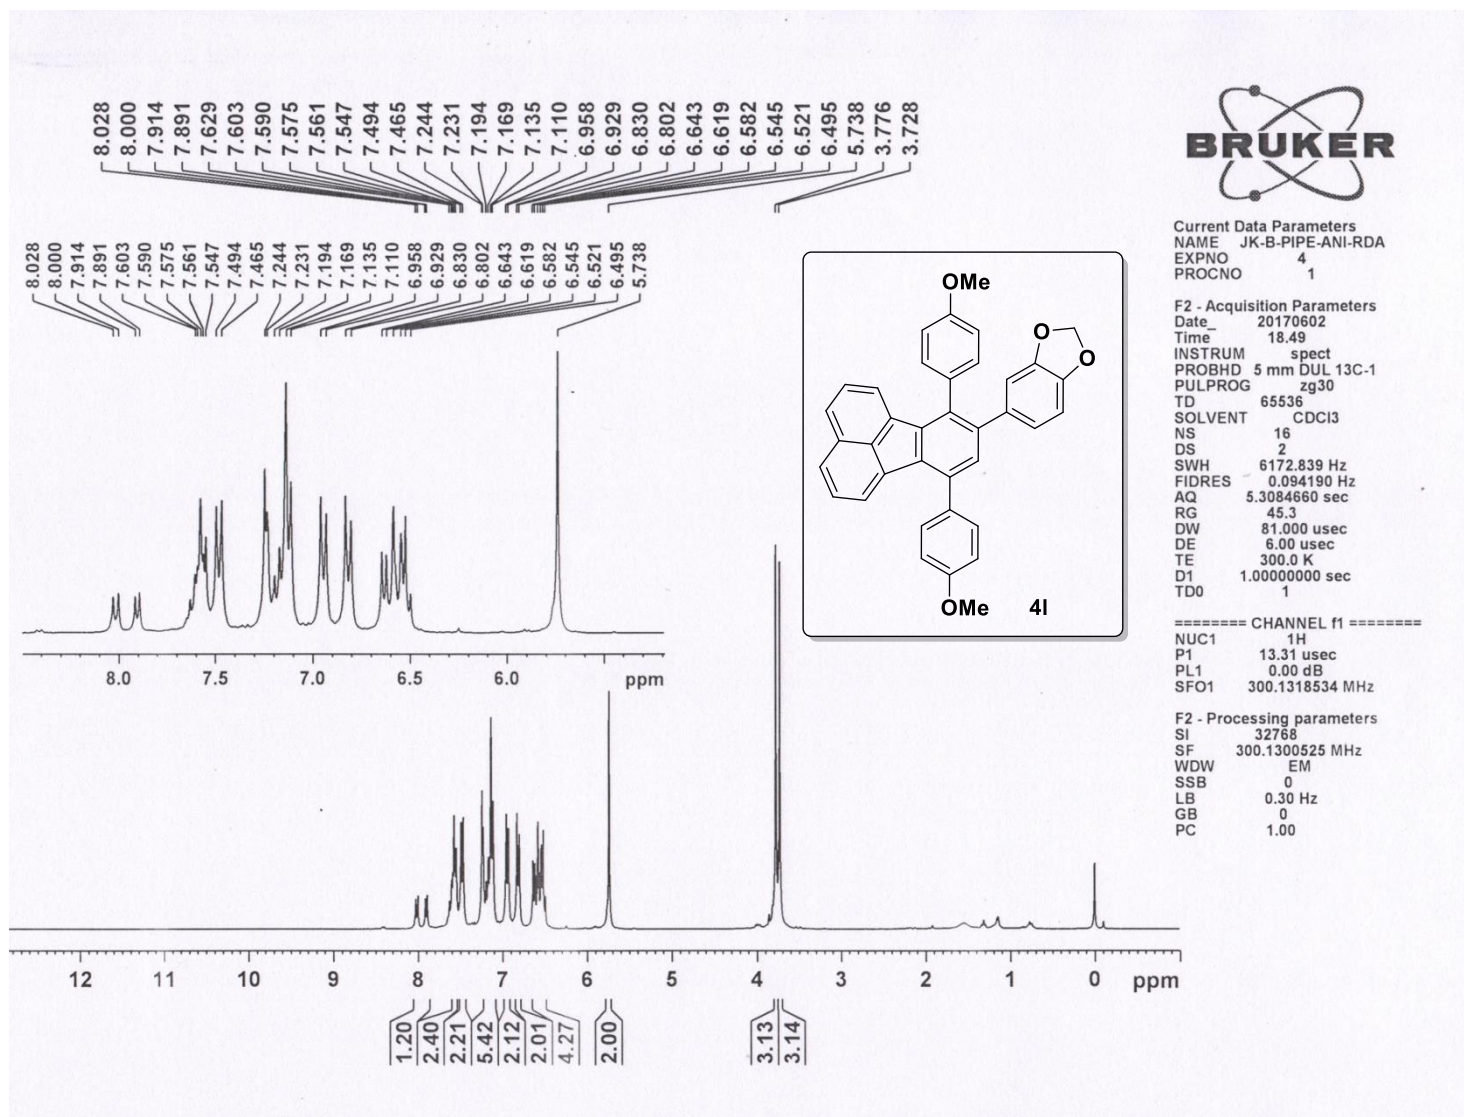

<sup>1</sup>H-NMR (300 MHz, CDCl<sub>3</sub>) spectrum of compound **4I**



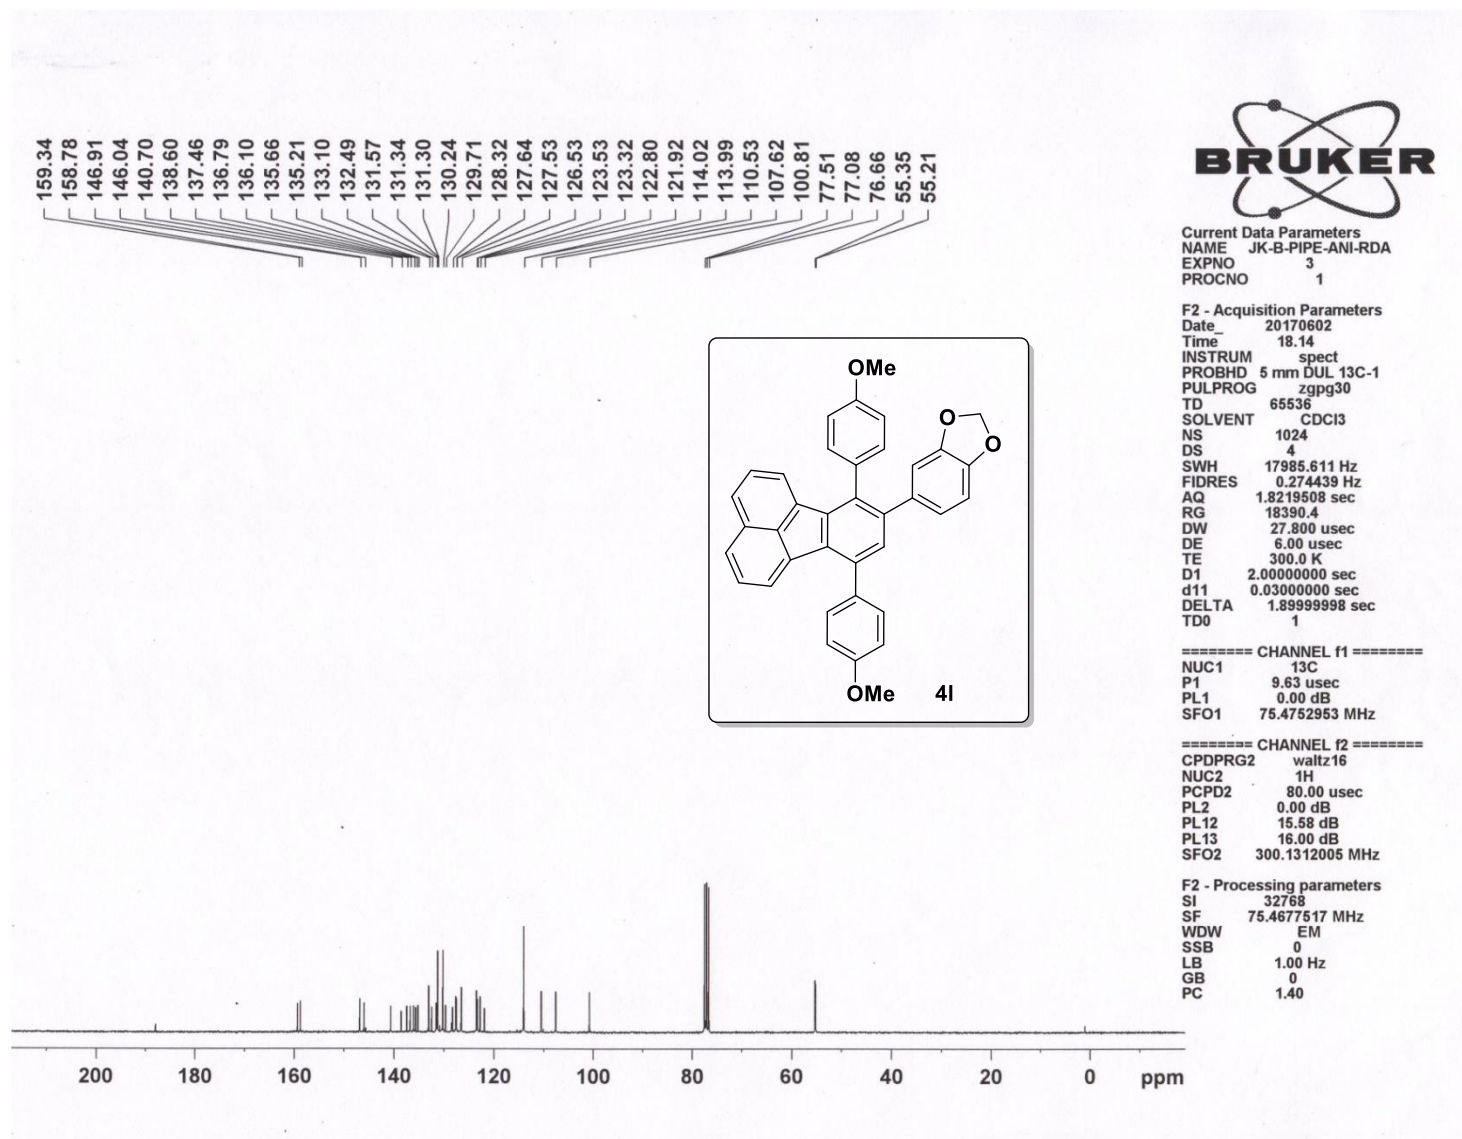

<sup>13</sup>C-NMR (75 MHz, CDCl<sub>3</sub>) spectrum of compound **4l**

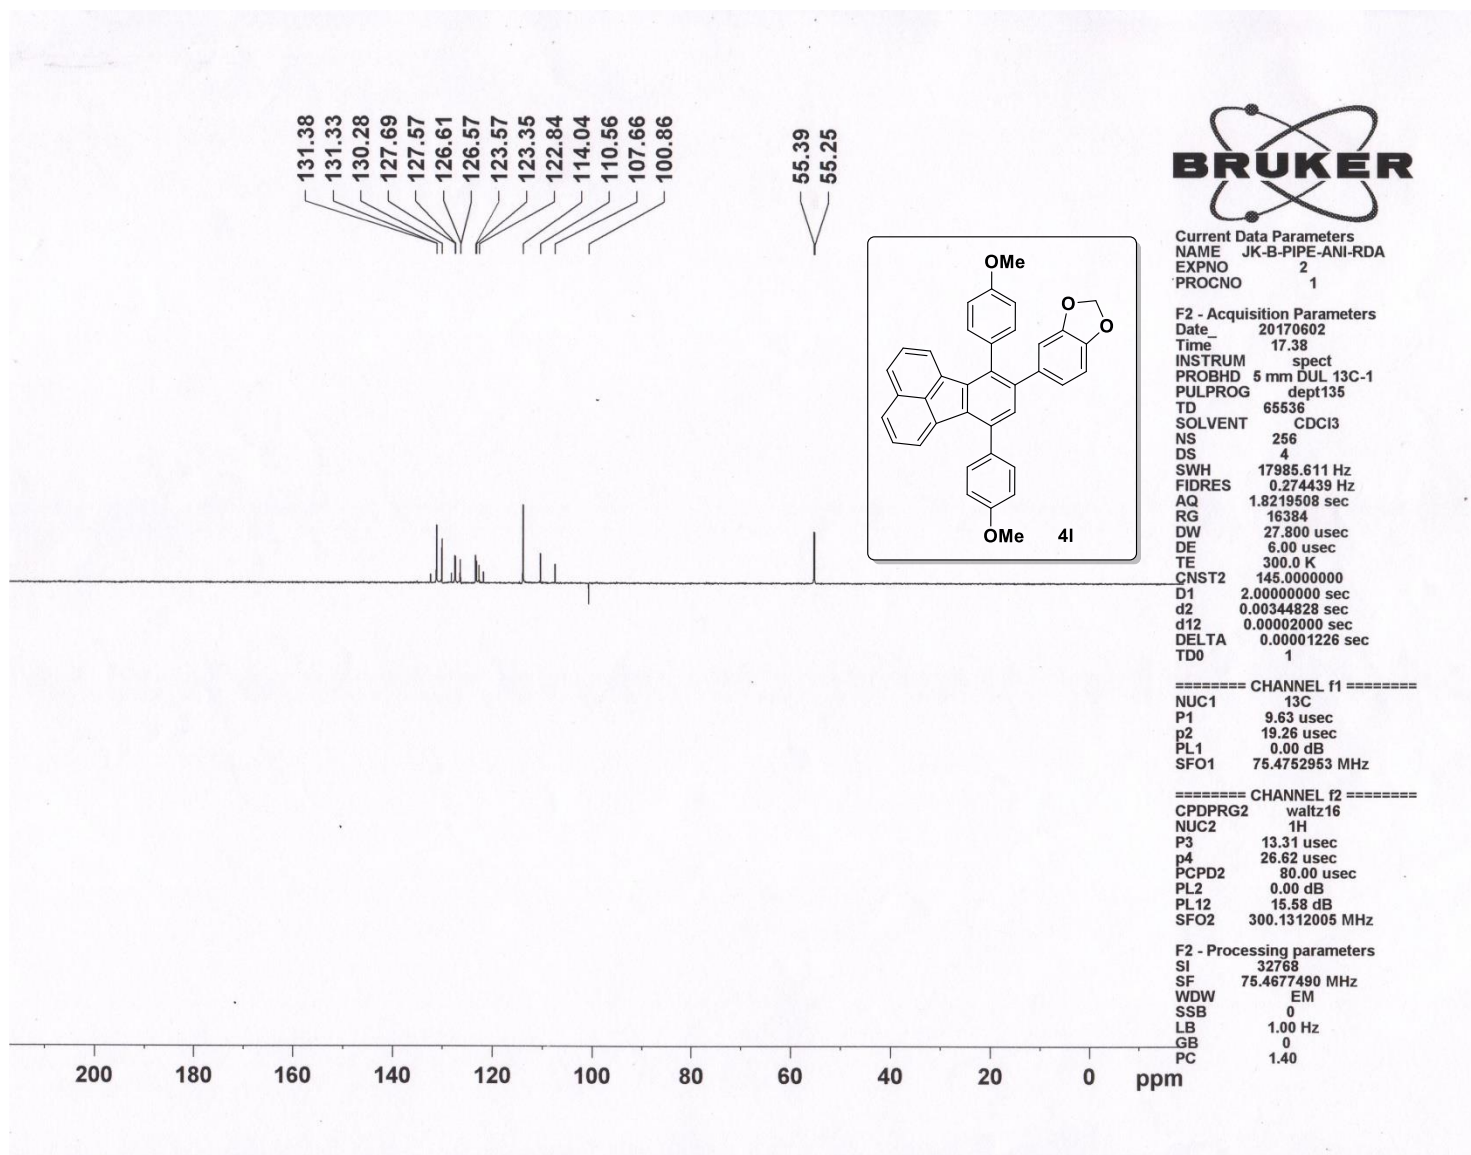

DEPT-135NMR (75 MHz, CDCl<sub>3</sub>) spectrum of compound **4l**

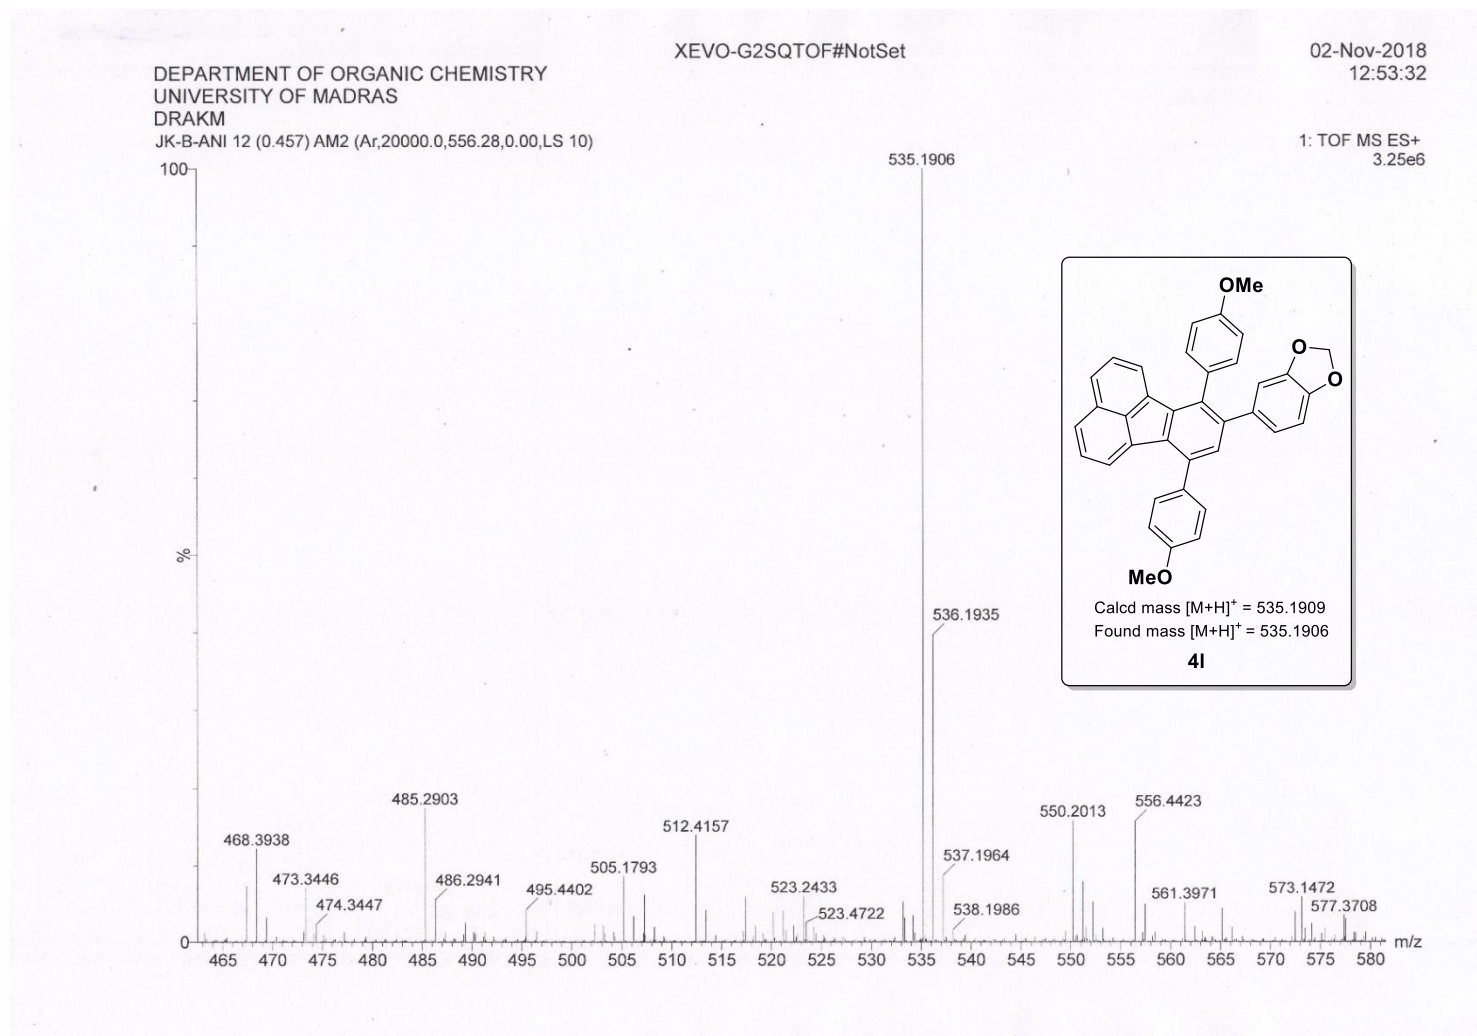

HRMS spectrum of compound **4I**

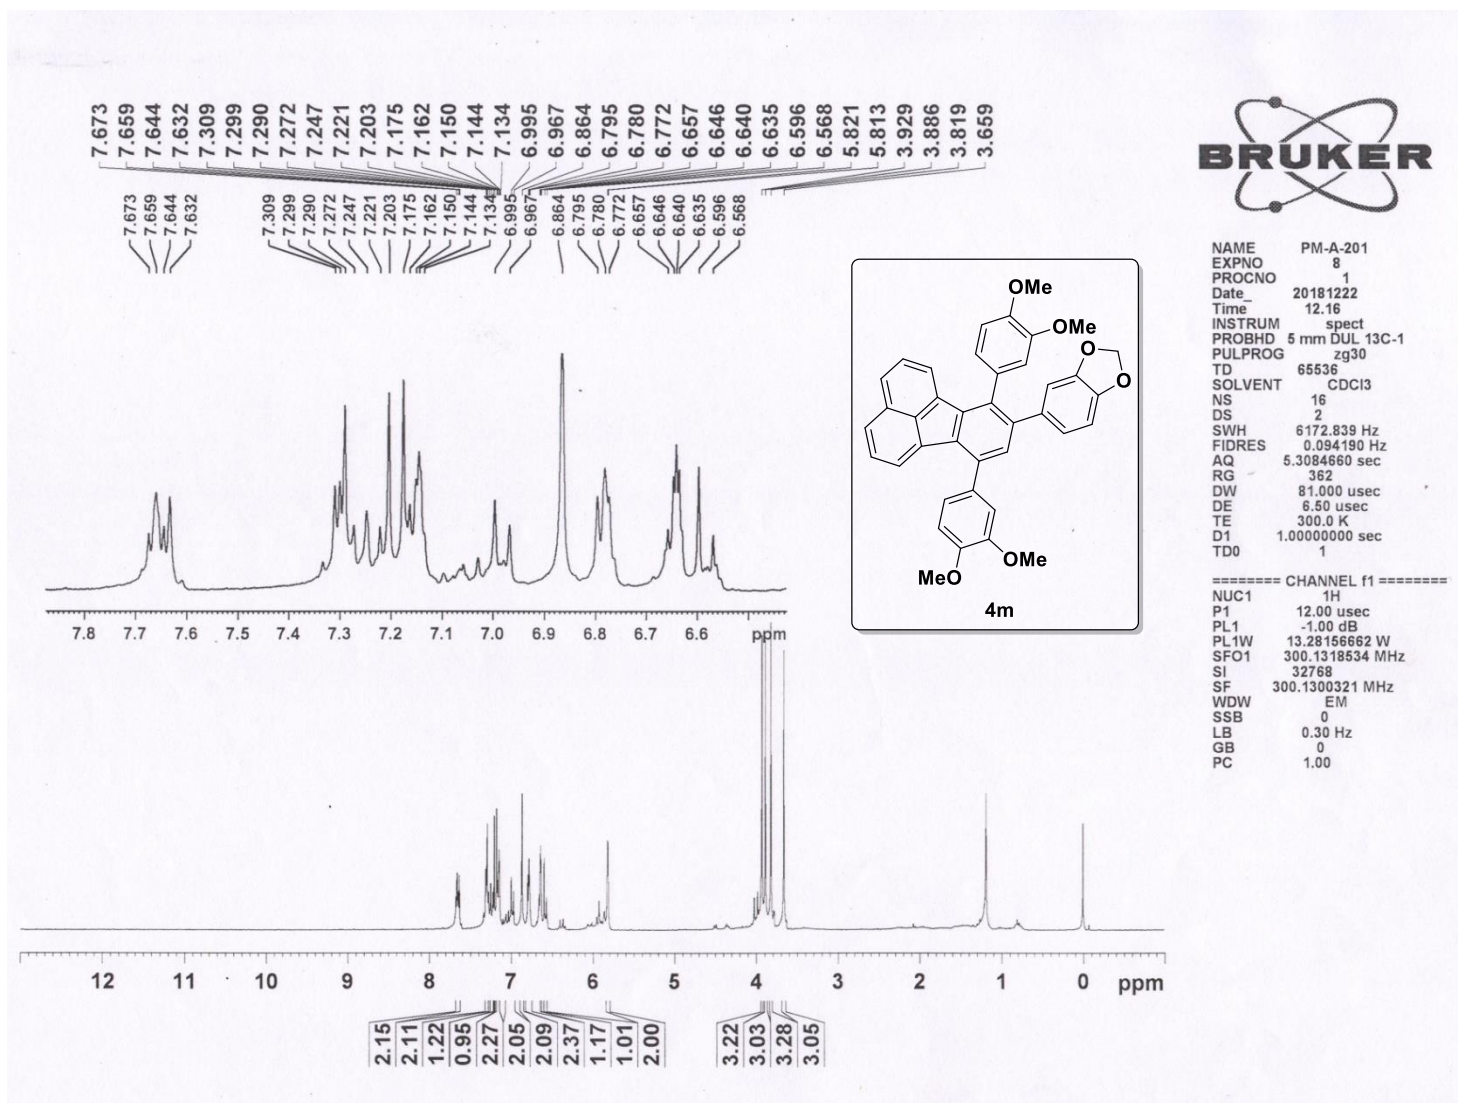

<sup>1</sup>H-NMR (300 MHz, CDCl<sub>3</sub>) spectrum of compound **4m**



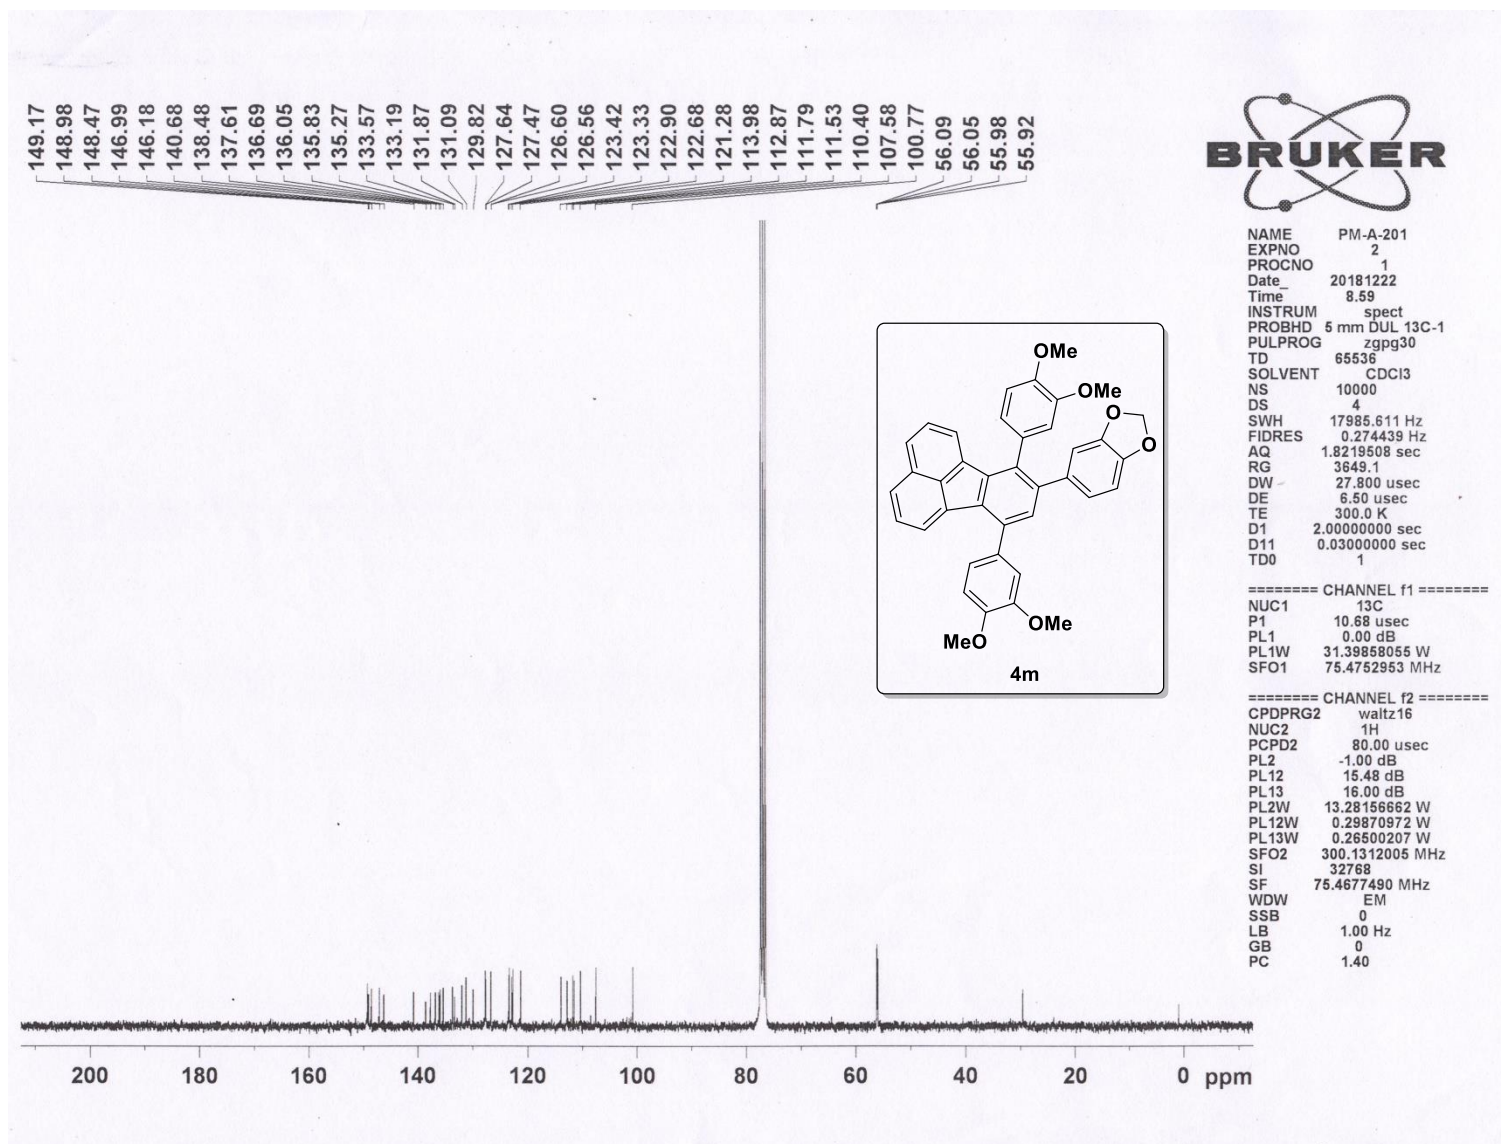

$^{13}\text{C}$ -NMR (75 MHz,  $\text{CDCl}_3$ ) spectrum of compound **4m**



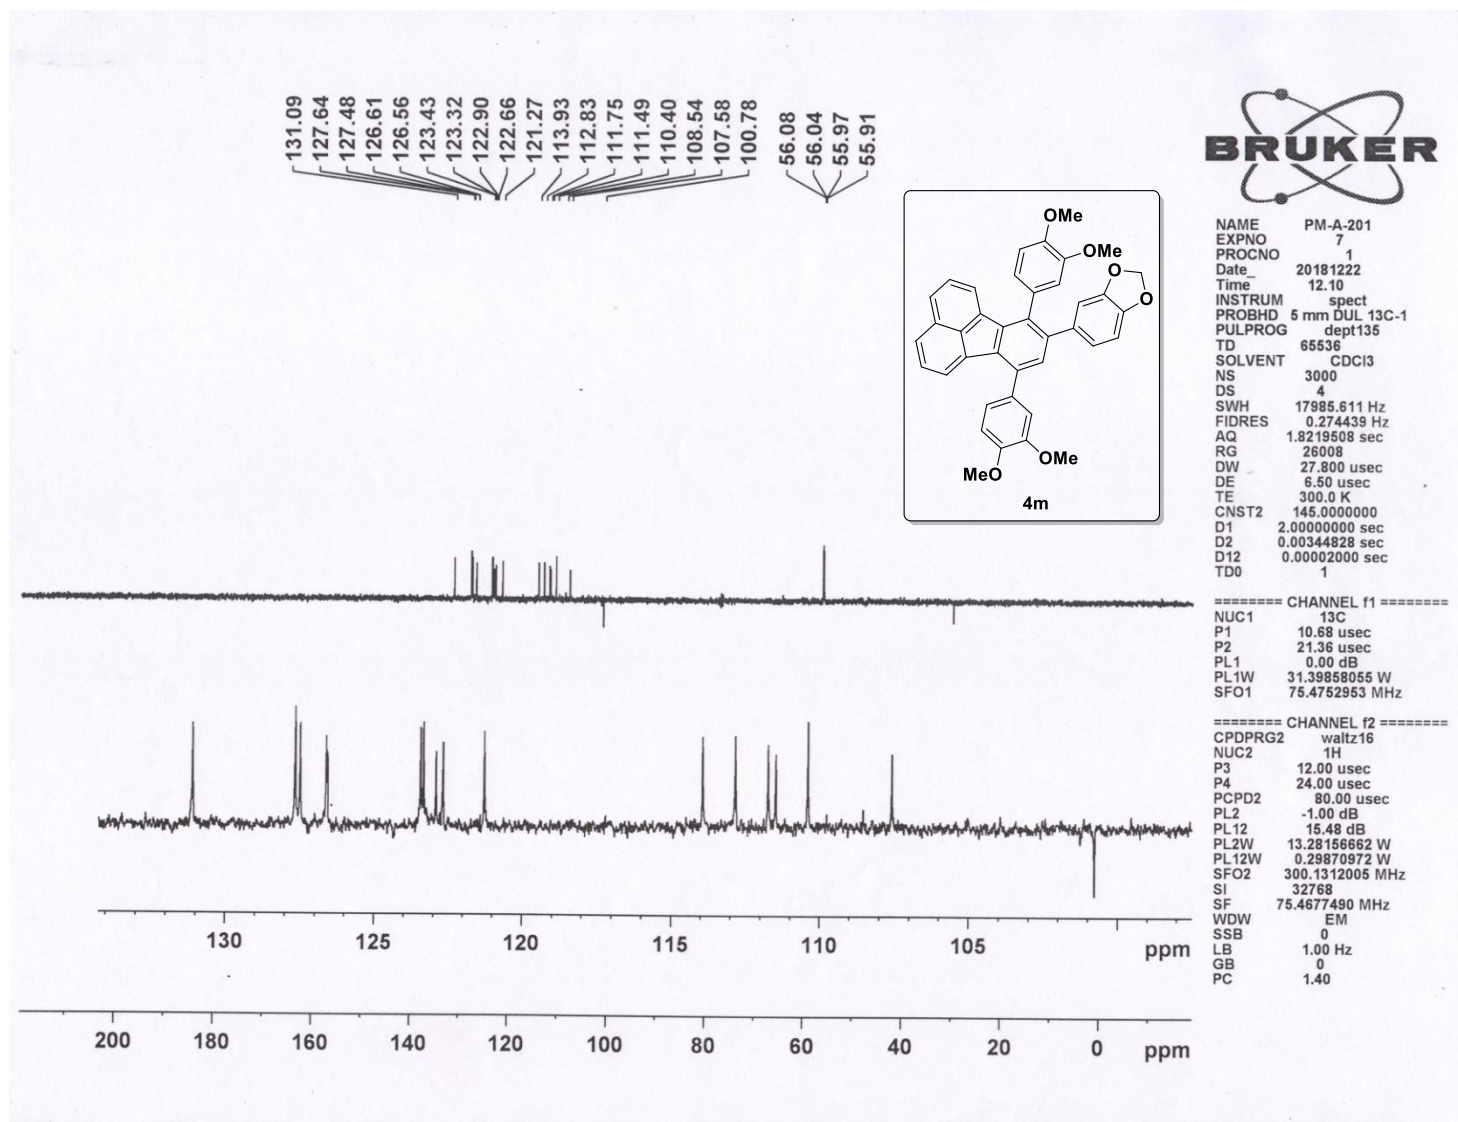

DEPT-135 NMR (75 MHz, CDCl<sub>3</sub>) spectrum of compound **4m**

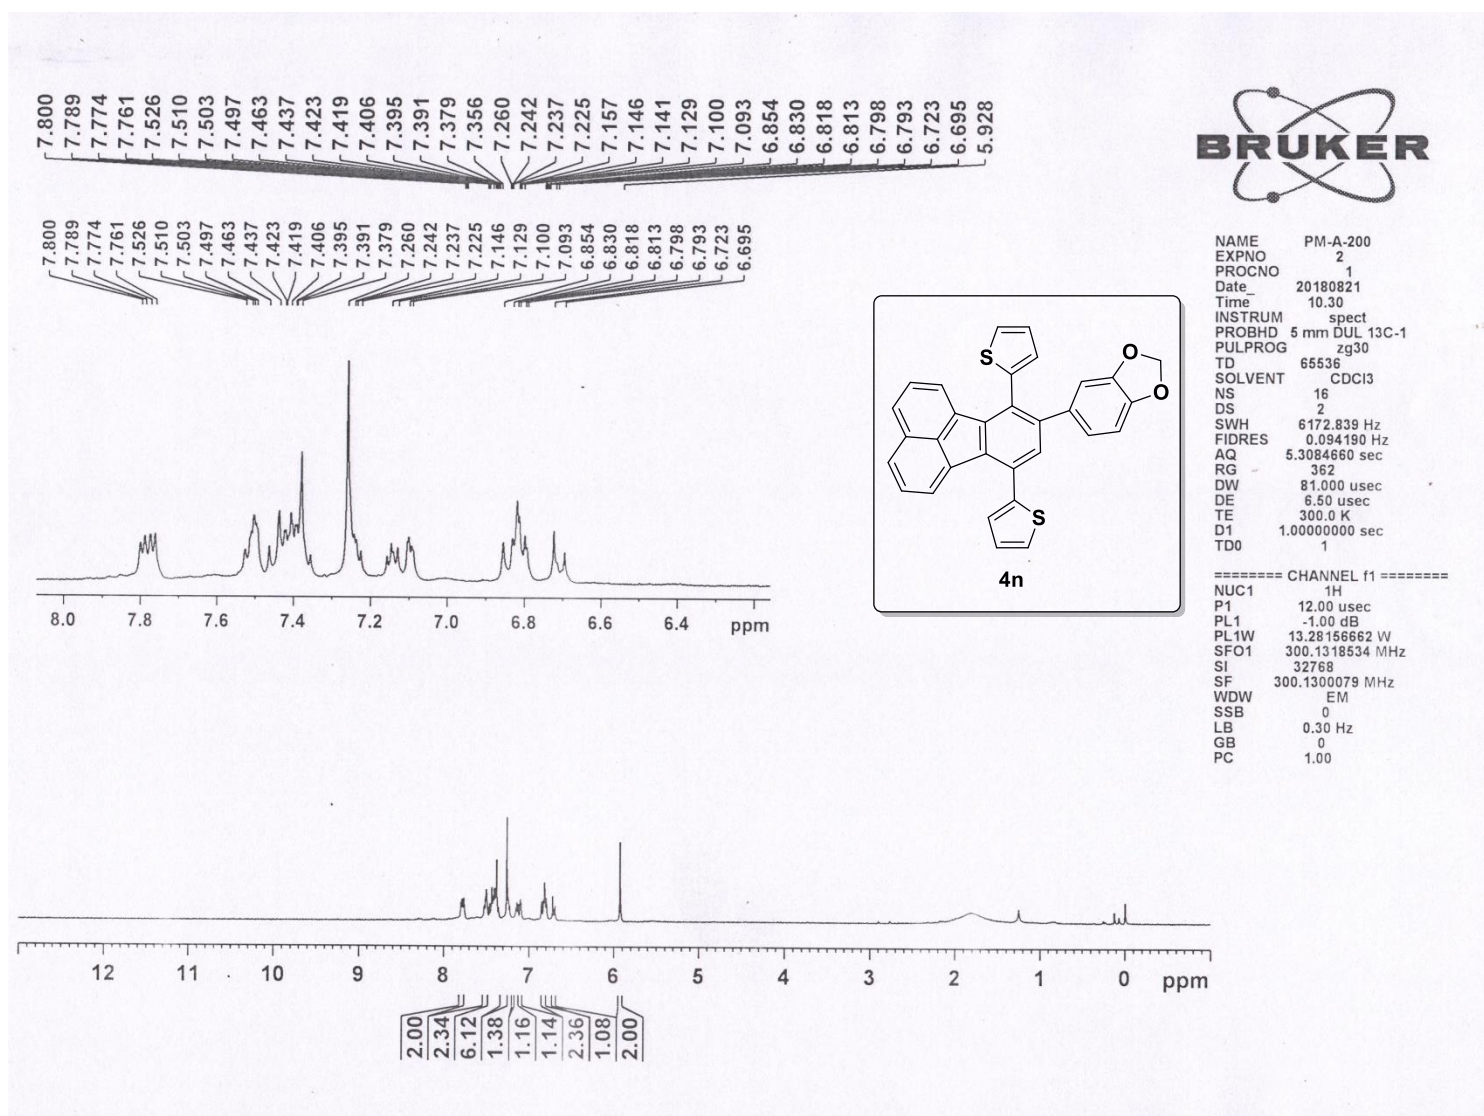

<sup>1</sup>H-NMR (300 MHz, CDCl<sub>3</sub>) spectrum of compound **4n**

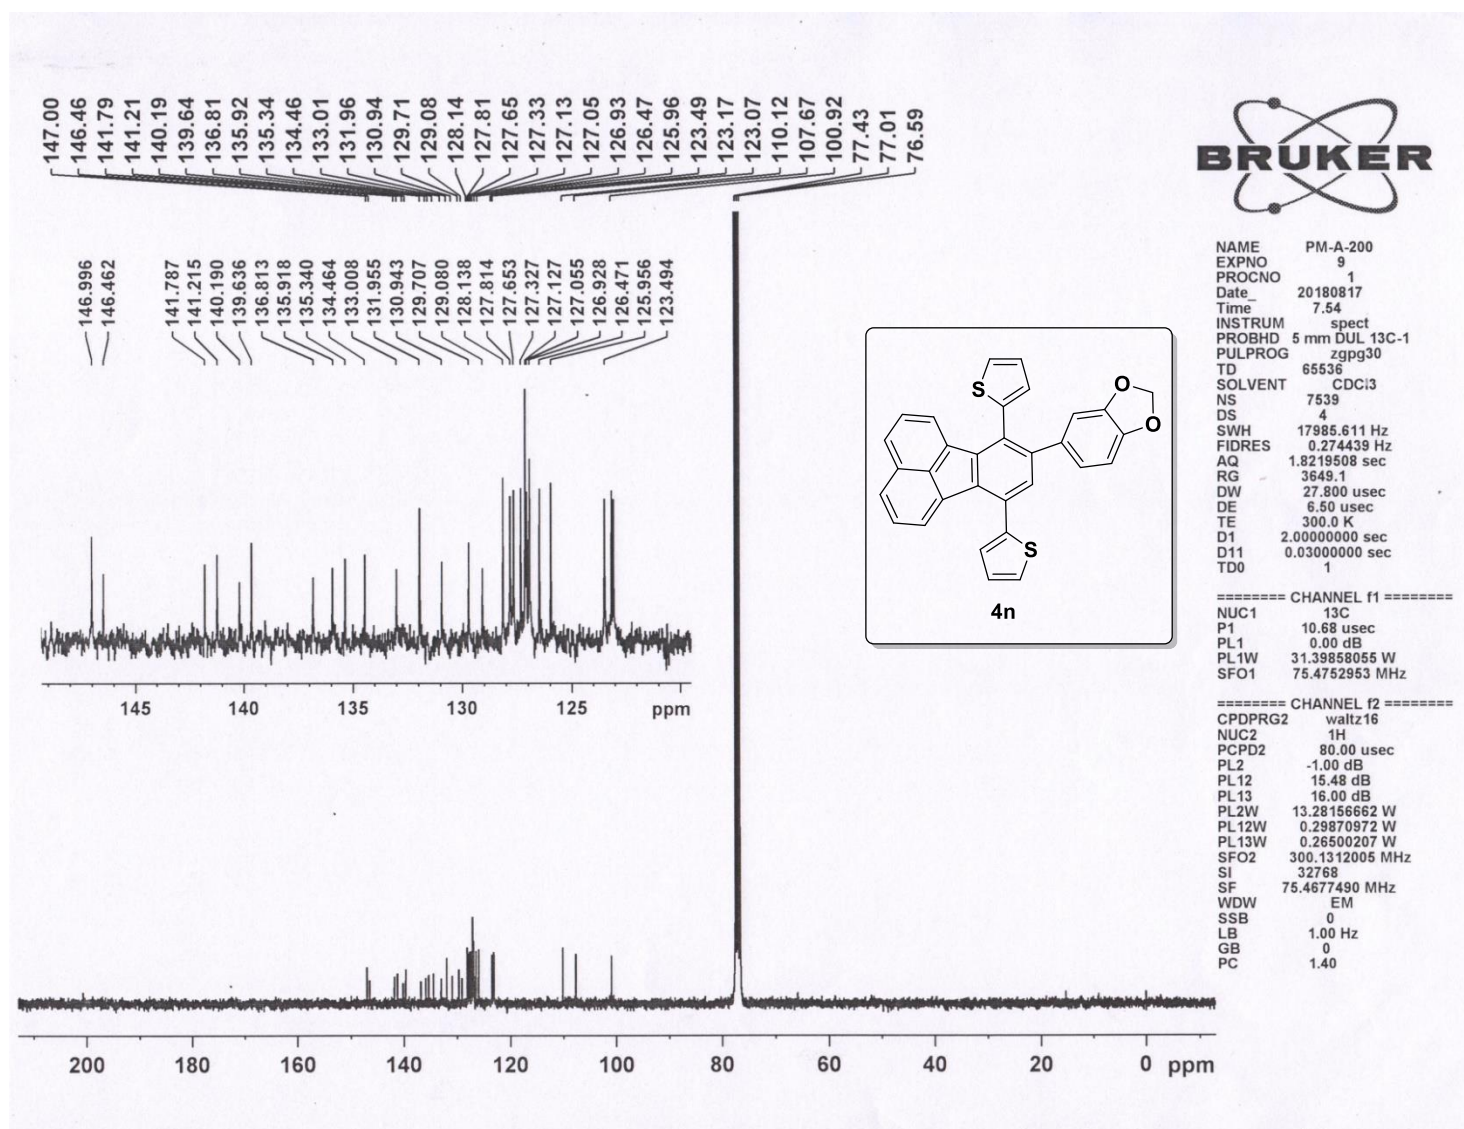

<sup>13</sup>C-NMR (75 MHz, CDCl<sub>3</sub>) spectrum of compound **4n**



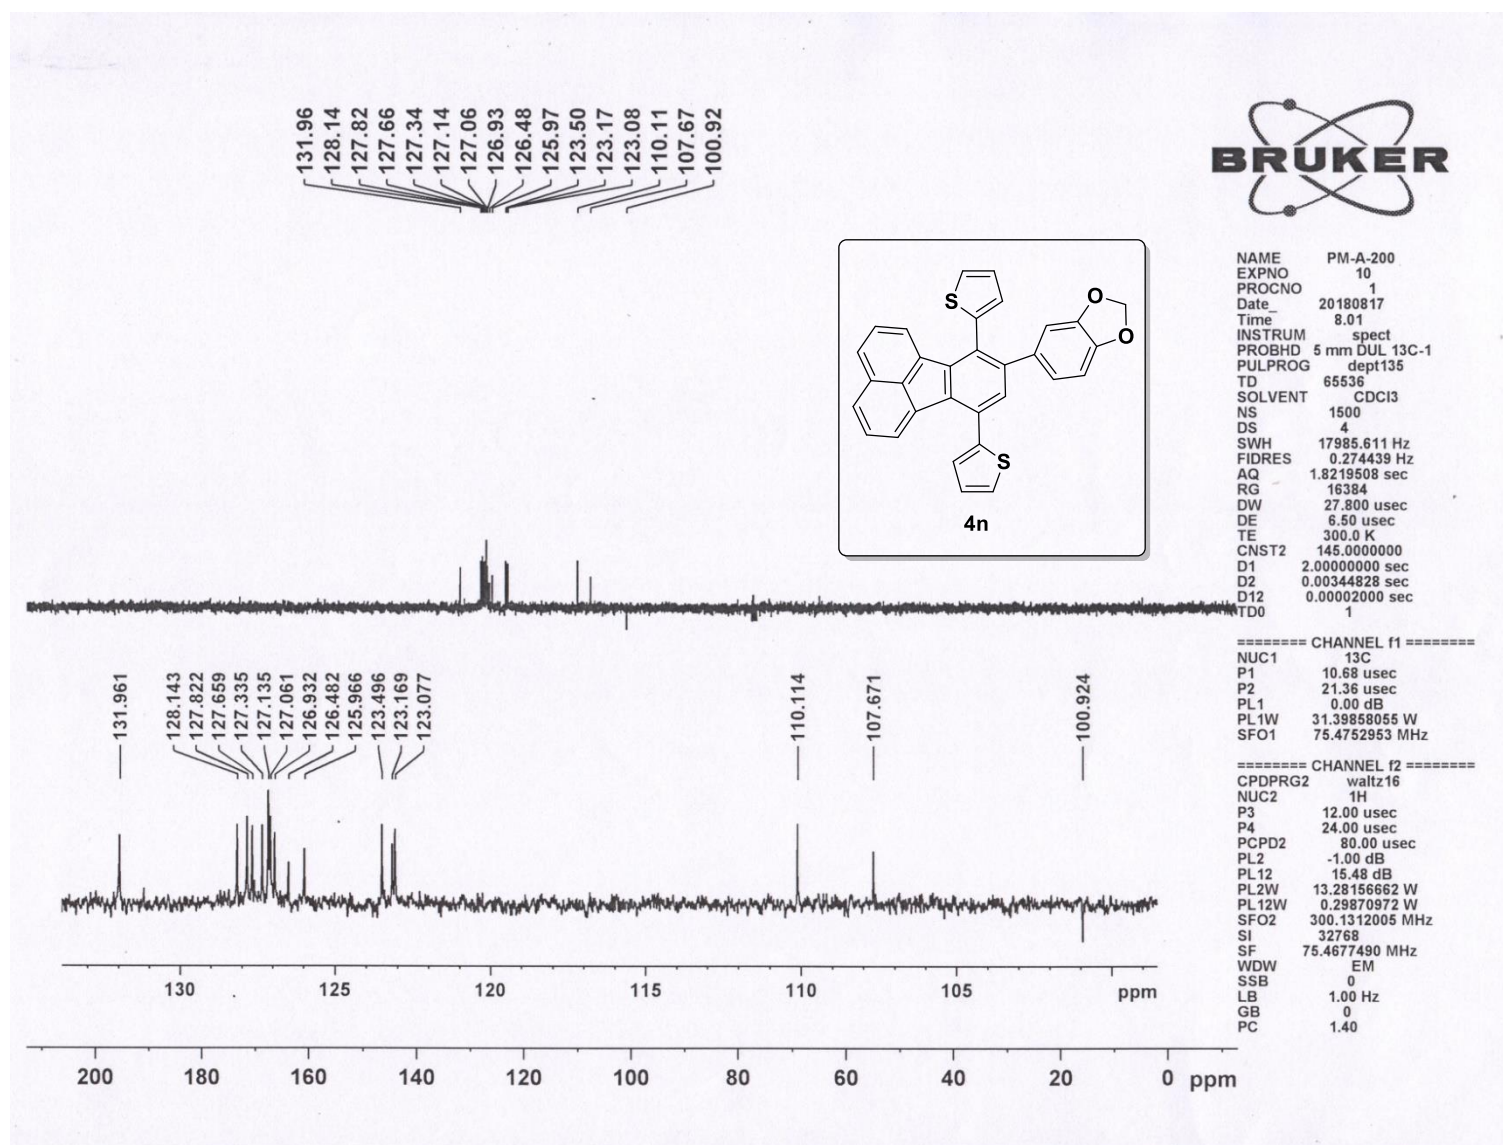

DEPARTMENT OF ORGANIC CHEMISTRY  
UNIVERSITY OF MADRAS  
DRAKM  
PM-A-200 39 (1.448) AM2 (Ar,20000.0,556.28,0.00,LS 10)

XEVO-G2SQTOF#NotSet

28-Nov-2018  
12:44:40

1: TOF MS ES+  
2.75e6

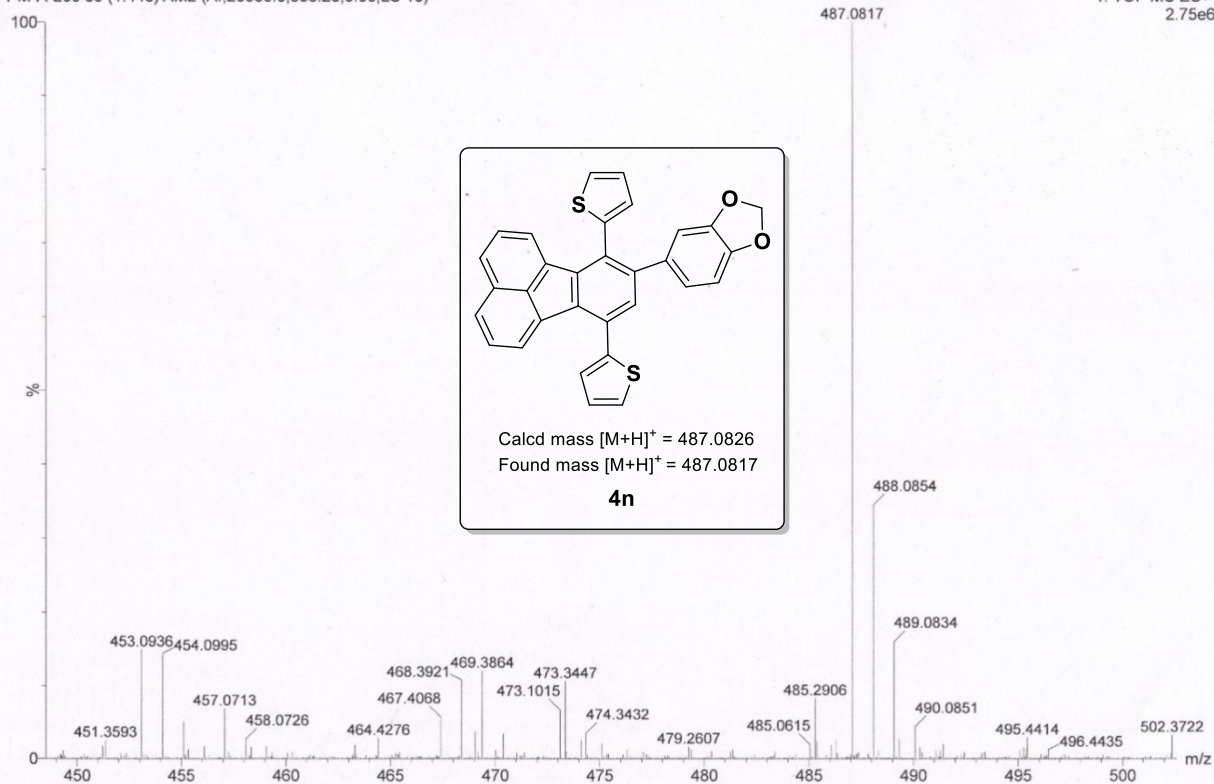

HRMS spectrum of compound **4n**



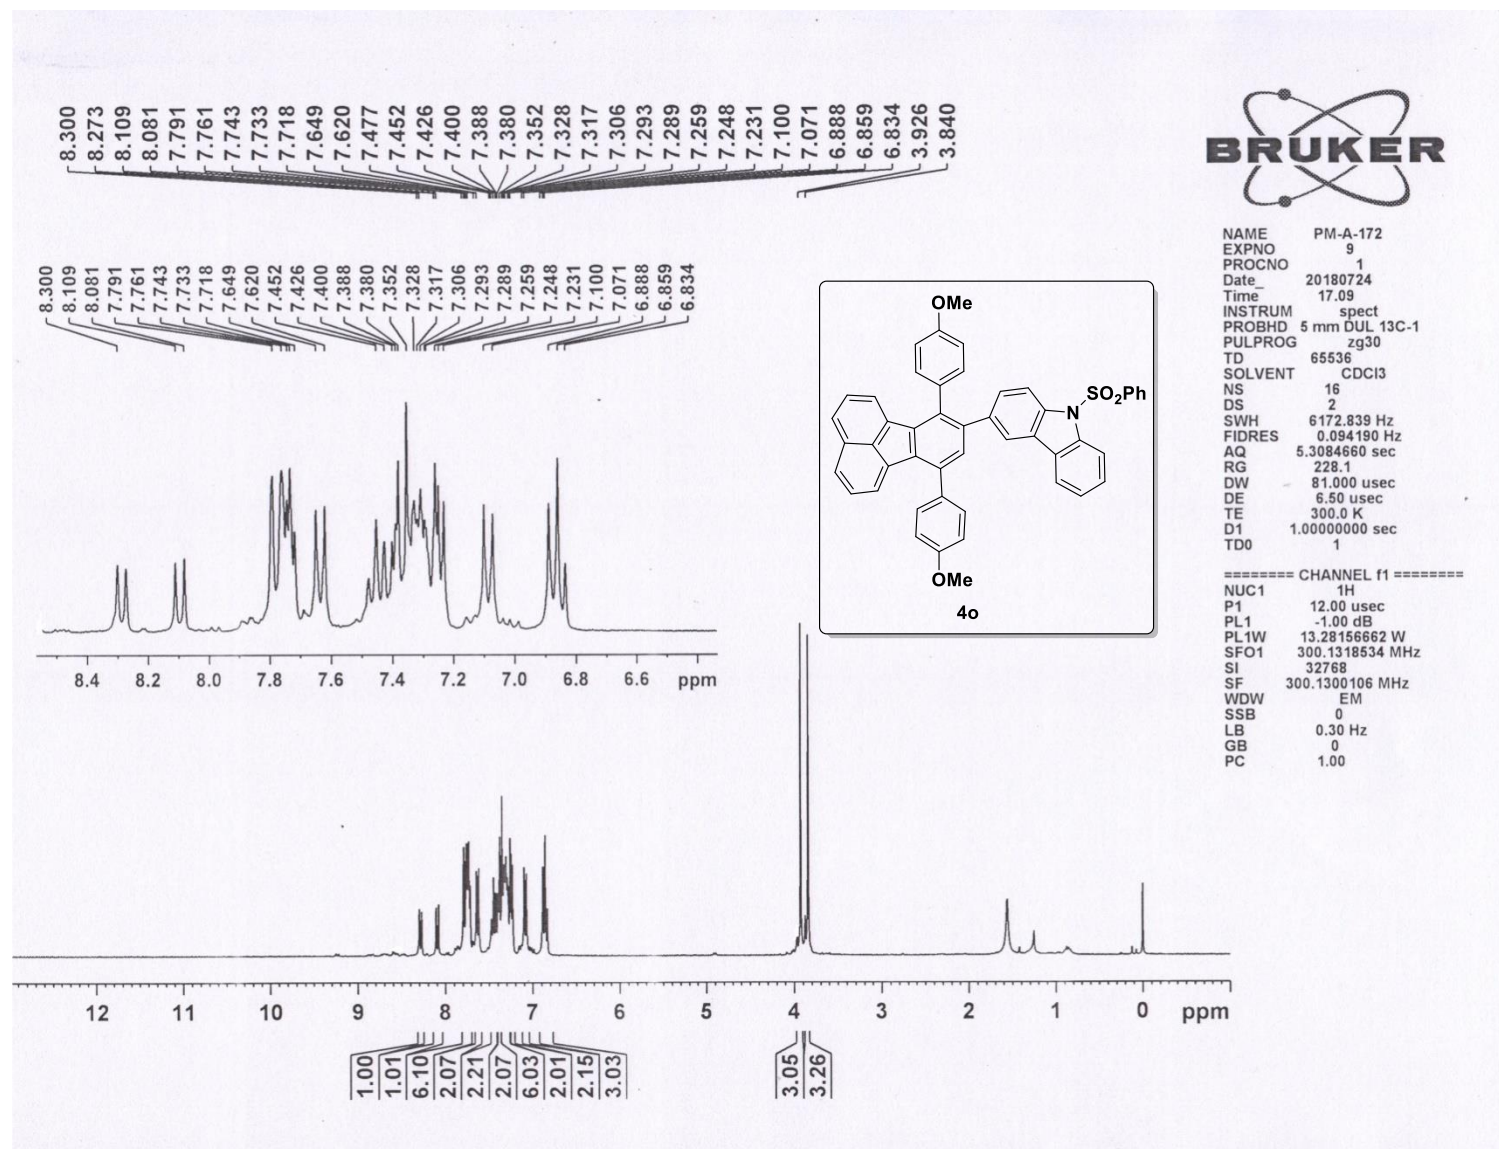

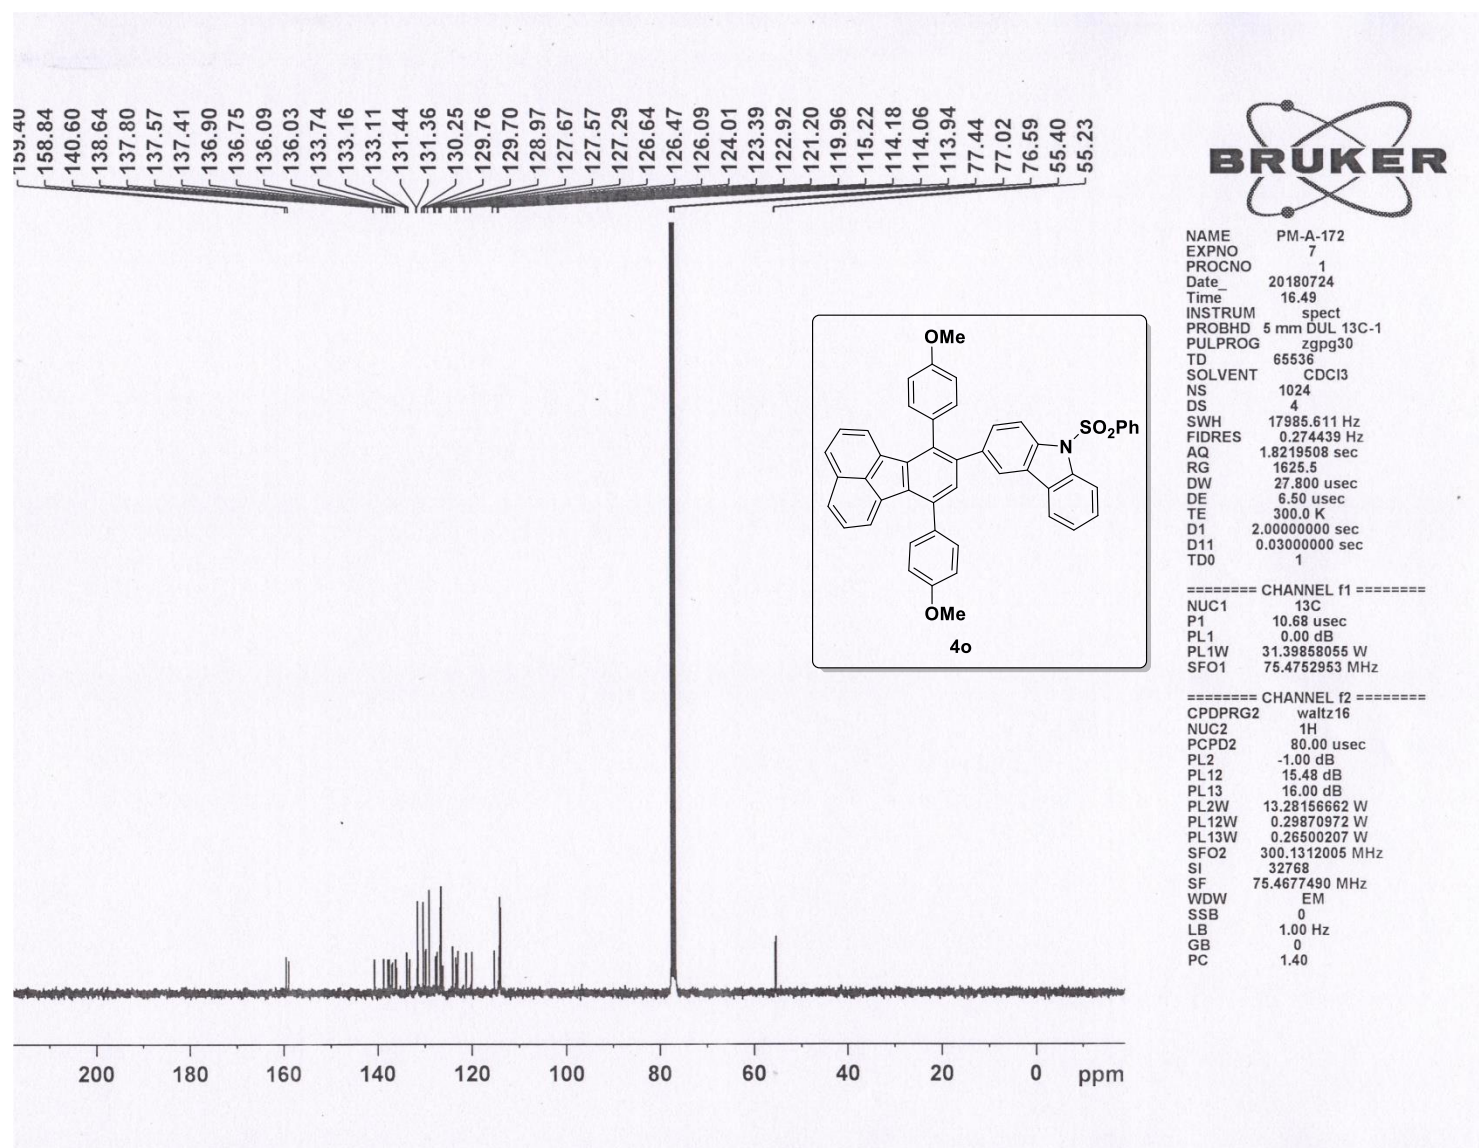

<sup>13</sup>C-NMR (75 MHz, CDCl<sub>3</sub>) spectrum of compound **4o**



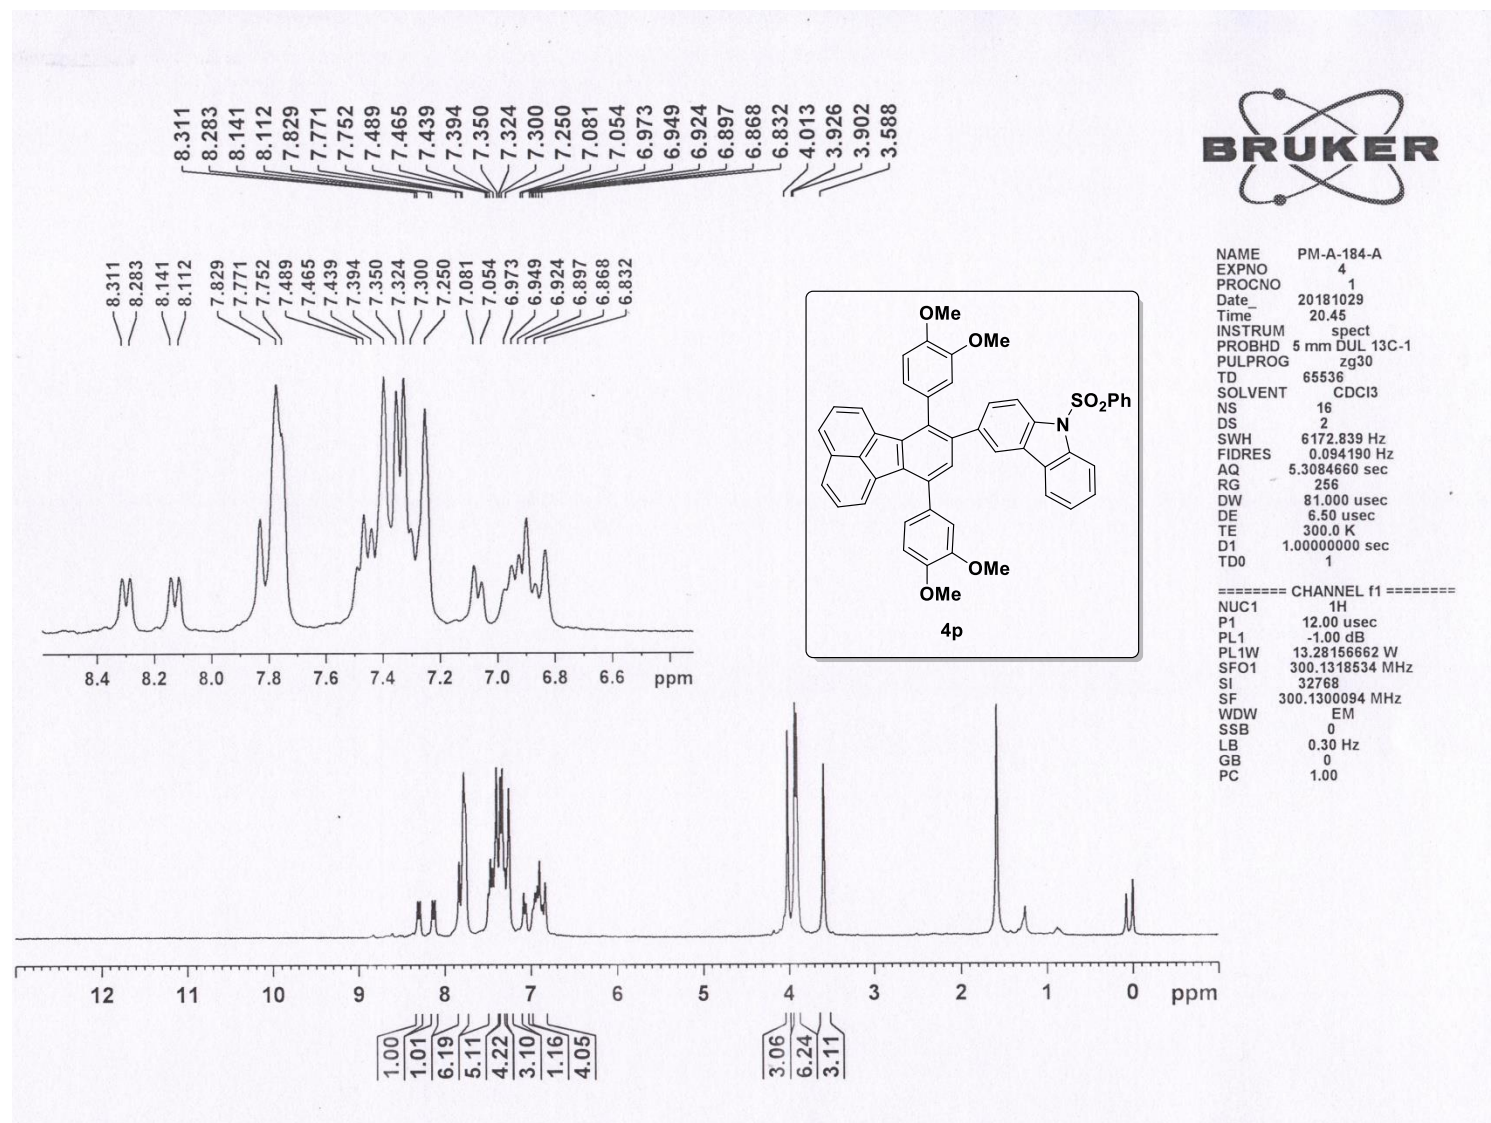

<sup>1</sup>H-NMR (300 MHz, CDCl<sub>3</sub>) spectrum of compound **4p**

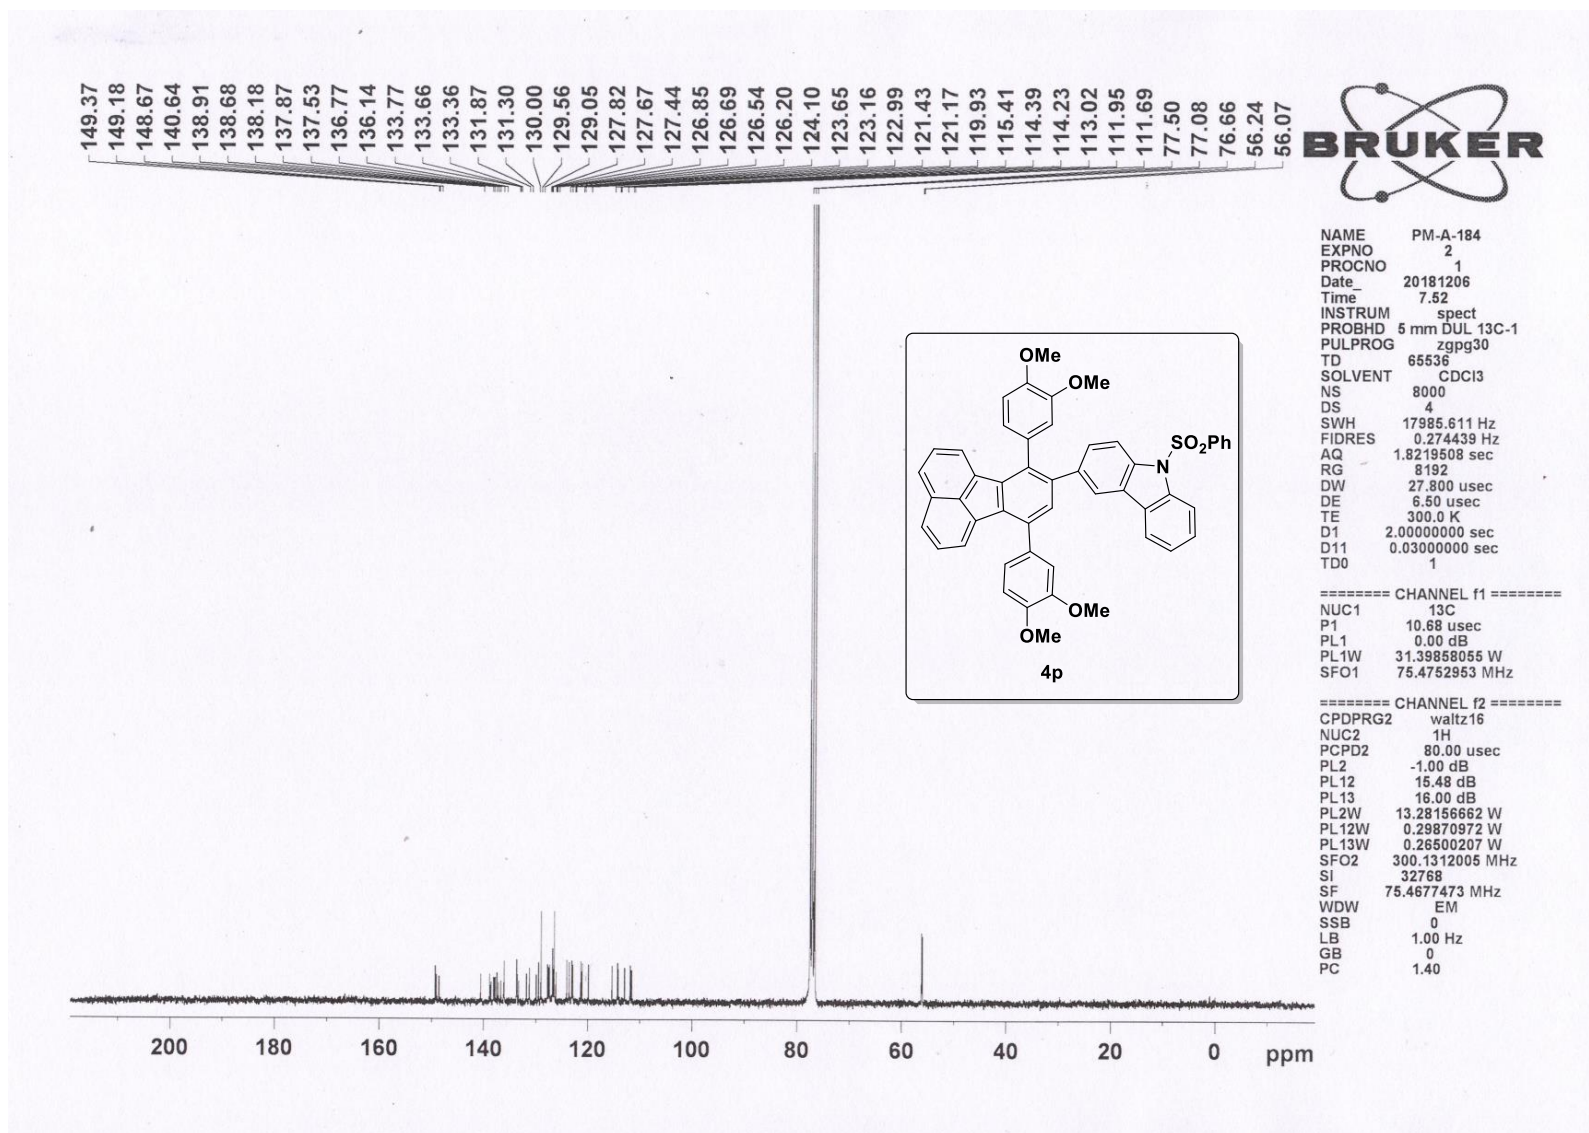

$^{13}\text{C}$ -NMR (75 MHz,  $\text{CDCl}_3$ ) spectrum of compound **4p**



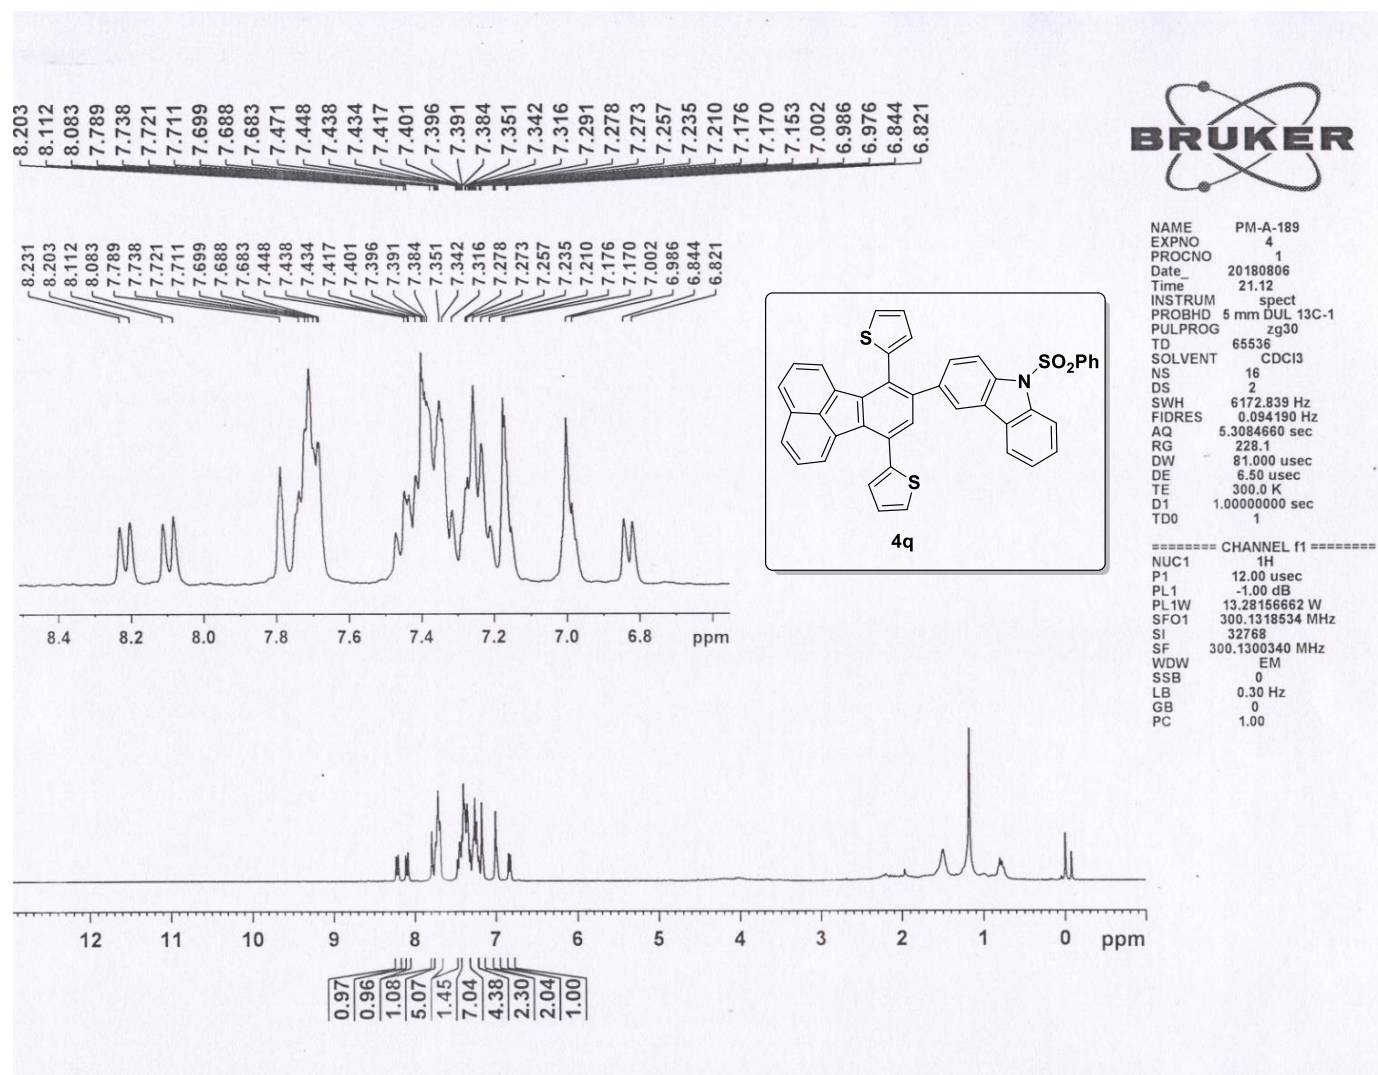

<sup>1</sup>H-NMR (300 MHz, CDCl<sub>3</sub>) spectrum of compound **4q**

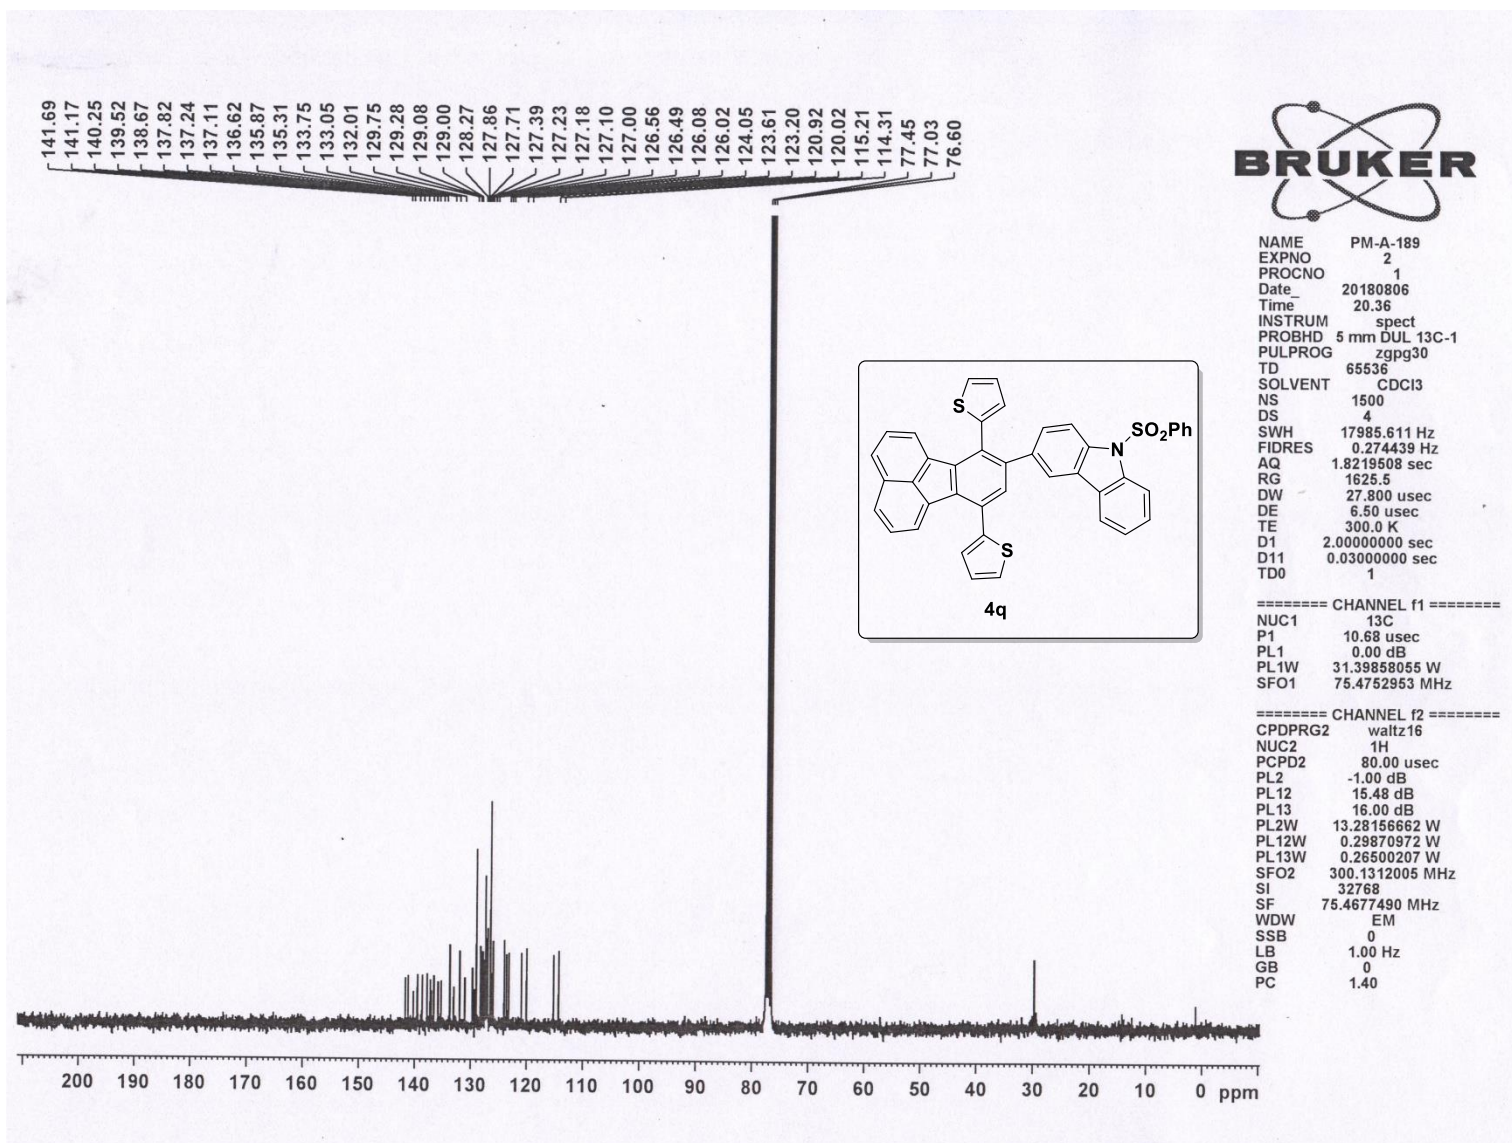

$^{13}\text{C}$ -NMR (75 MHz,  $\text{CDCl}_3$ ) spectrum of compound **4q**

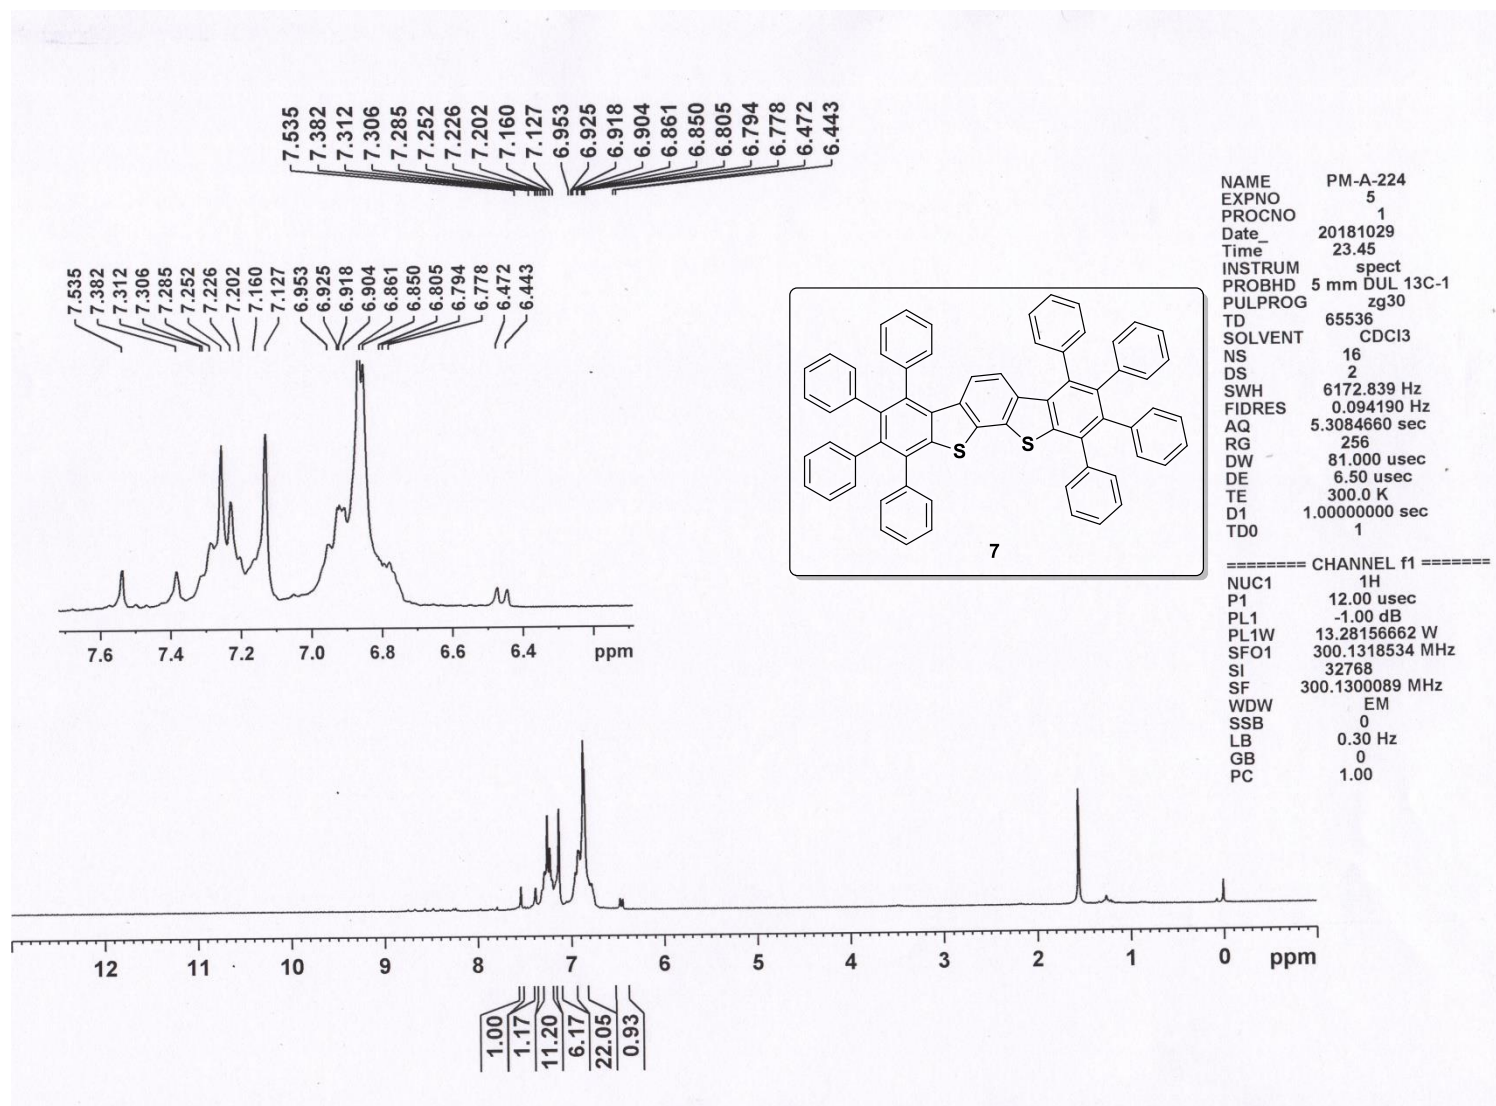

<sup>1</sup>H-NMR (300 MHz, CDCl<sub>3</sub>) spectrum of compound **7**



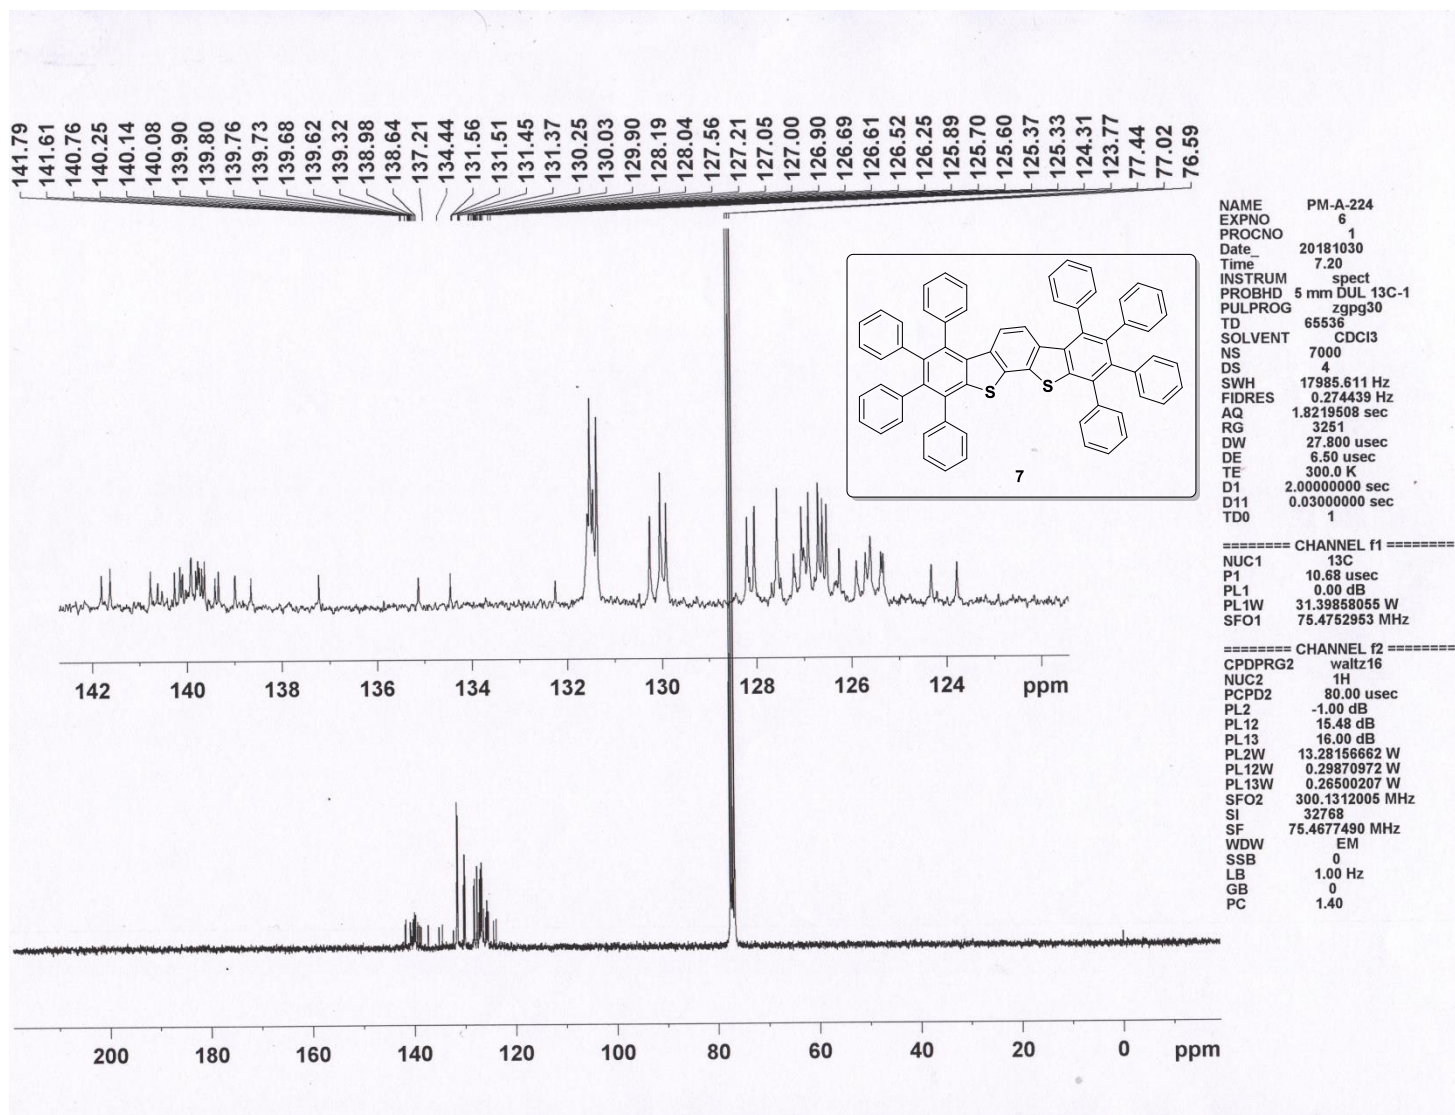

$^{13}\text{C}$ -NMR (75 MHz,  $\text{CDCl}_3$ ) spectrum of compound **7**



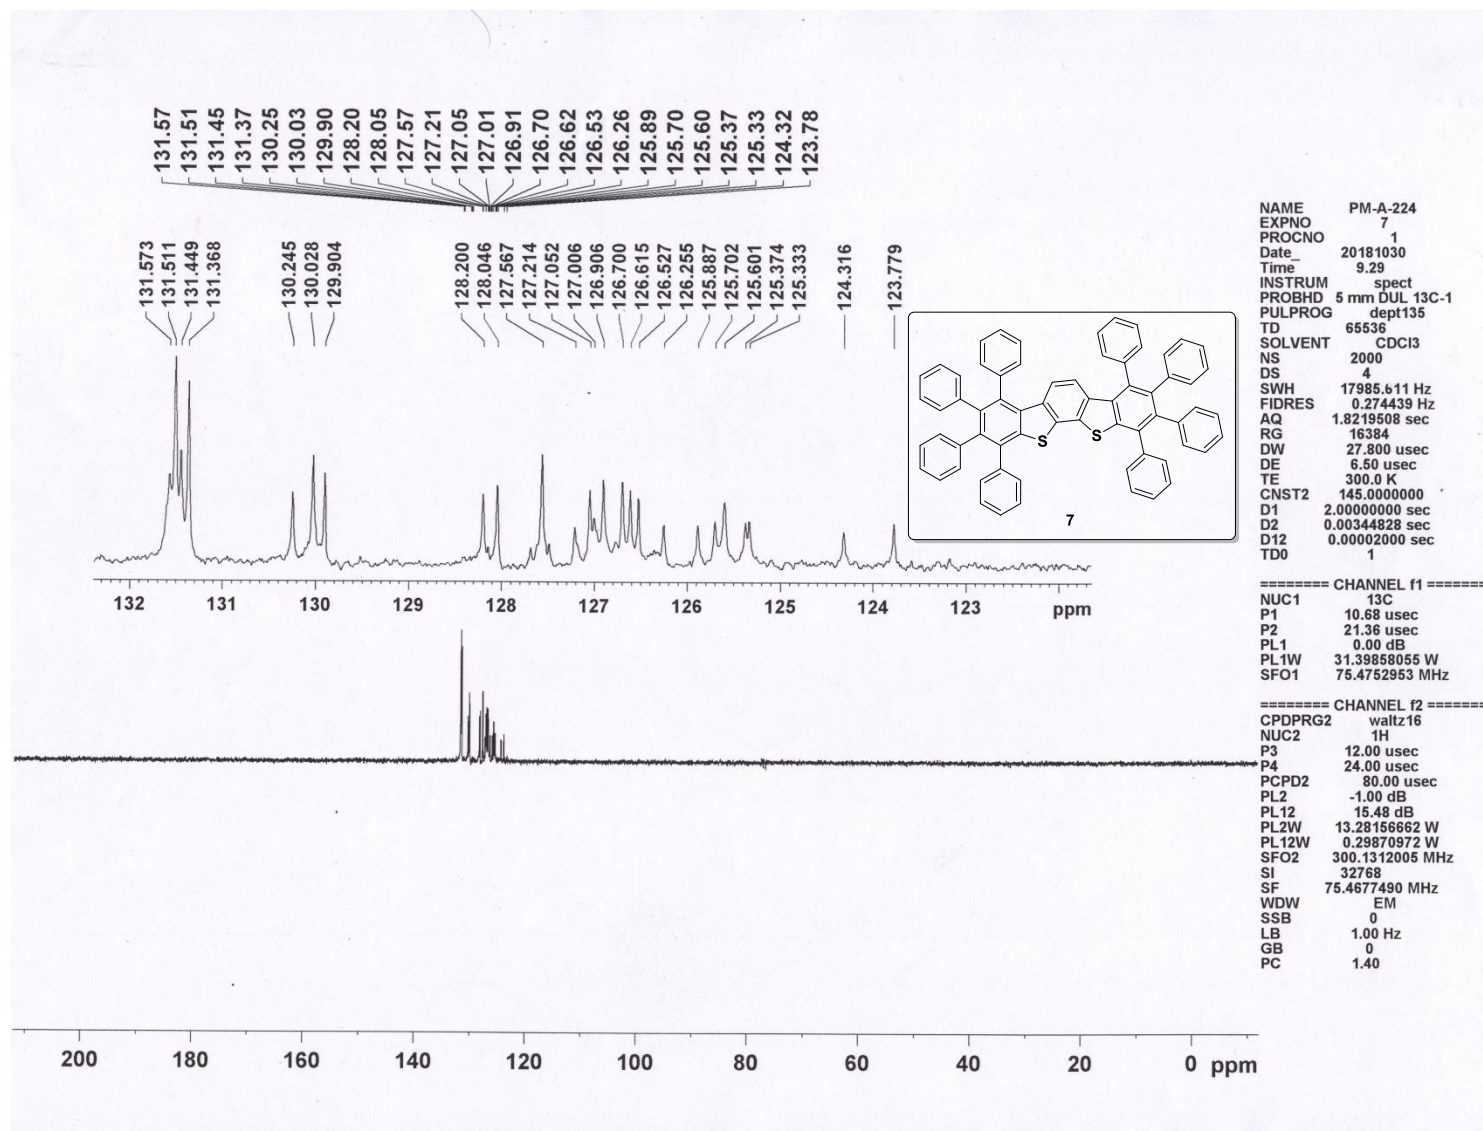

DEPT-135 NMR (75 MHz, CDCl<sub>3</sub>) spectrum of compound 7

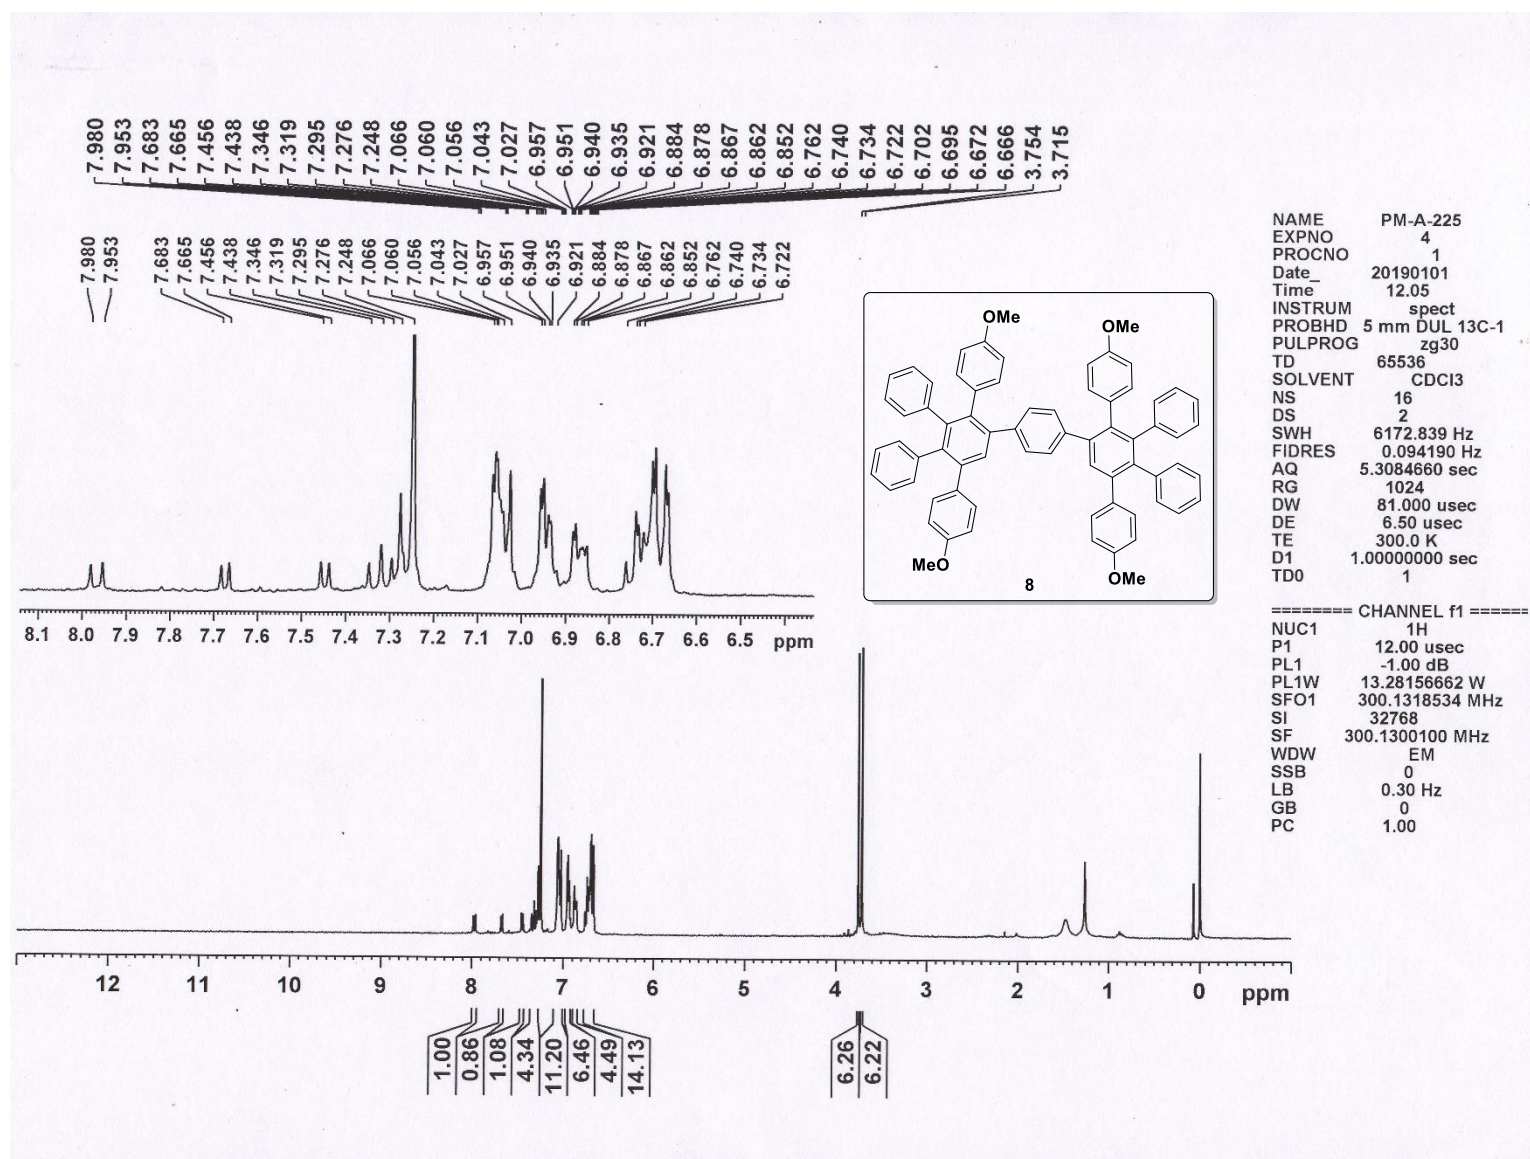

<sup>1</sup>H-NMR (300 MHz, CDCl<sub>3</sub>) spectrum of compound **8**



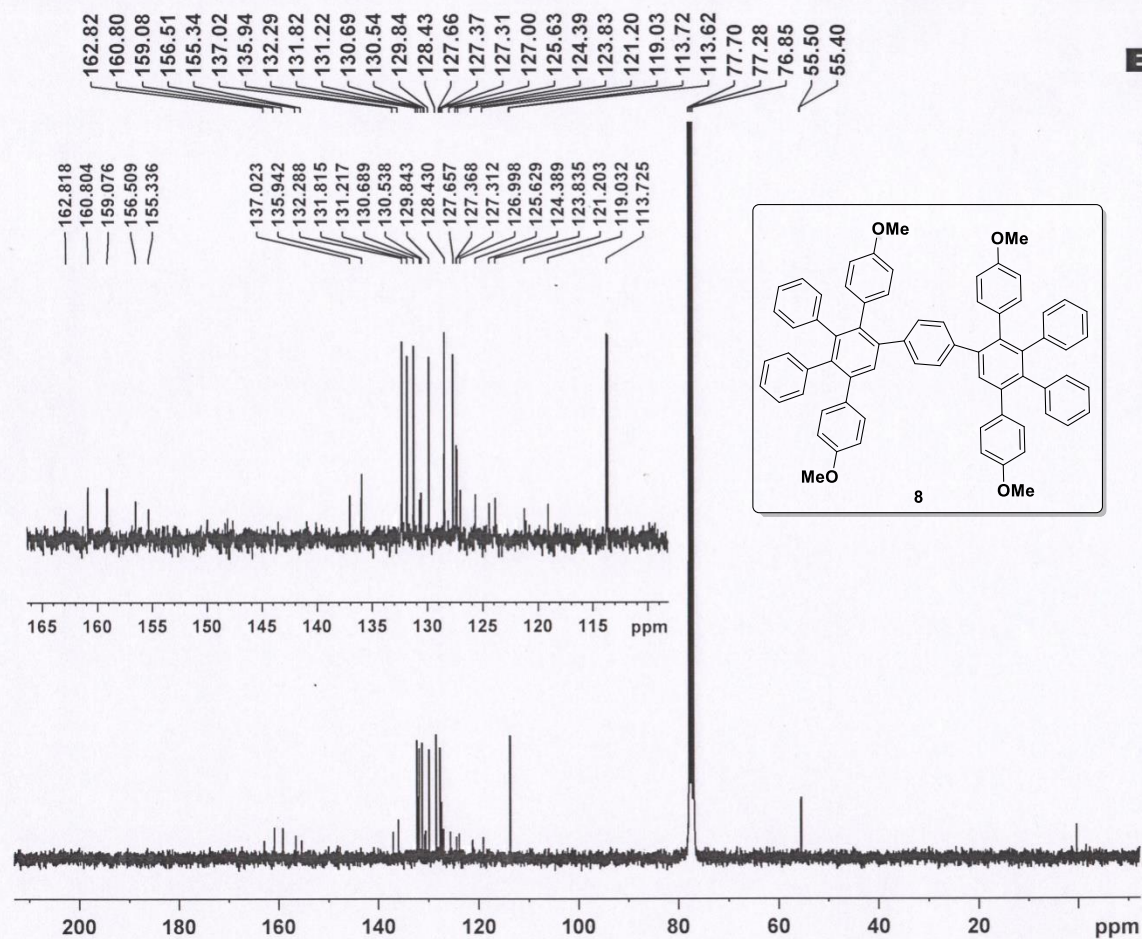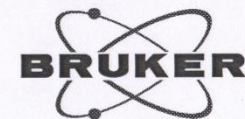

NAME PM-A-225  
EXPNO 3  
PROCNO 1  
Date\_ 20190101  
Time 12.02  
INSTRUM spect  
PROBHD 5 mm DUL 13C-1  
PULPROG zgpg30  
TD 65536  
SOLVENT CDCl<sub>3</sub>  
NS 15000  
DS 4  
SWH 17985.611 Hz  
FIDRES 0.274439 Hz  
AQ 1.8219508 sec  
RG 4096  
DW 27.800 usec  
DE 6.50 usec  
TE 300.0 K  
D1 2.00000000 sec  
D11 0.03000000 sec  
TD0 1

===== CHANNEL f1 =====  
NUC1 13C  
P1 10.68 usec  
PL1 0.00 dB  
PL1W 31.39858055 W  
SFO1 75.4752953 MHz

===== CHANNEL f2 =====  
CPDPRG2 waltz16  
NUC2 1H  
PCPD2 80.00 usec  
PL2 -1.00 dB  
PL12 15.48 dB  
PL13 16.00 dB  
PL2W 13.28156662 W  
PL12W 0.29870972 W  
PL13W 0.26500207 W  
SFO2 300.1312005 MHz  
SI 32768  
SF 75.4677220 MHz  
VDW EM  
SSB 0  
LB 1.00 Hz  
GB 0  
PC 1.40

<sup>13</sup>C-NMR (75 MHz, CDCl<sub>3</sub>) spectrum of compound 8

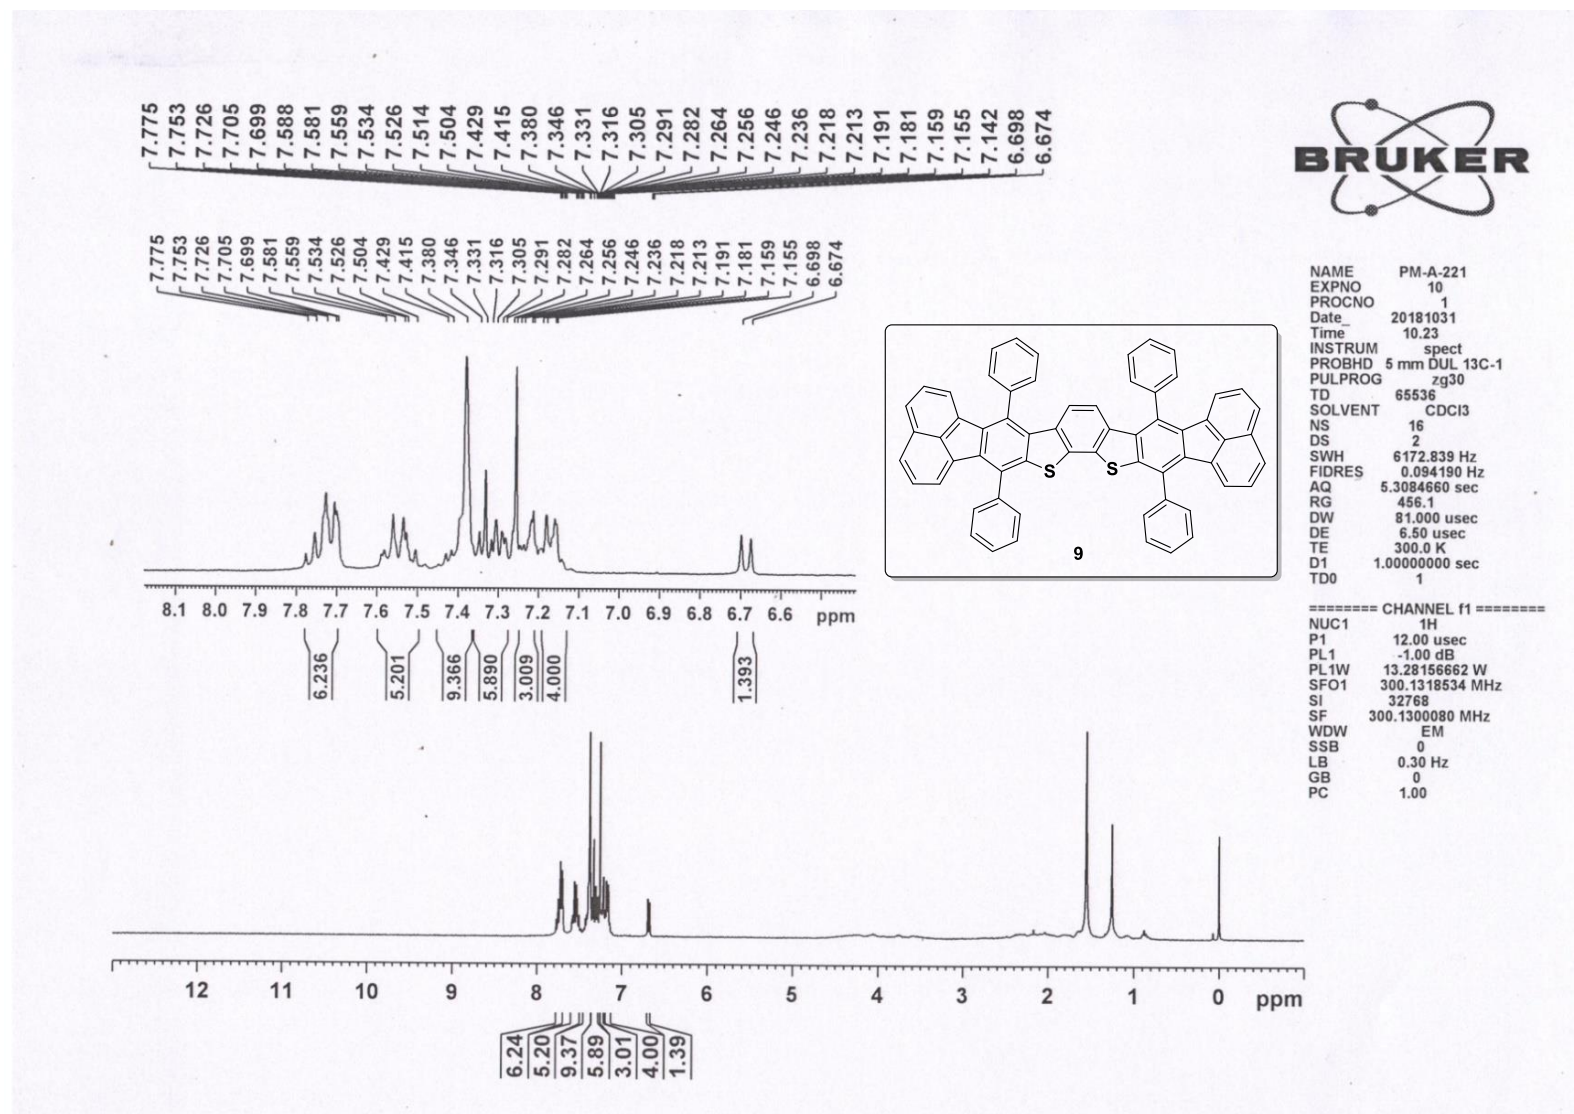

<sup>1</sup>H-NMR (300 MHz, CDCl<sub>3</sub>) spectrum of compound **9**



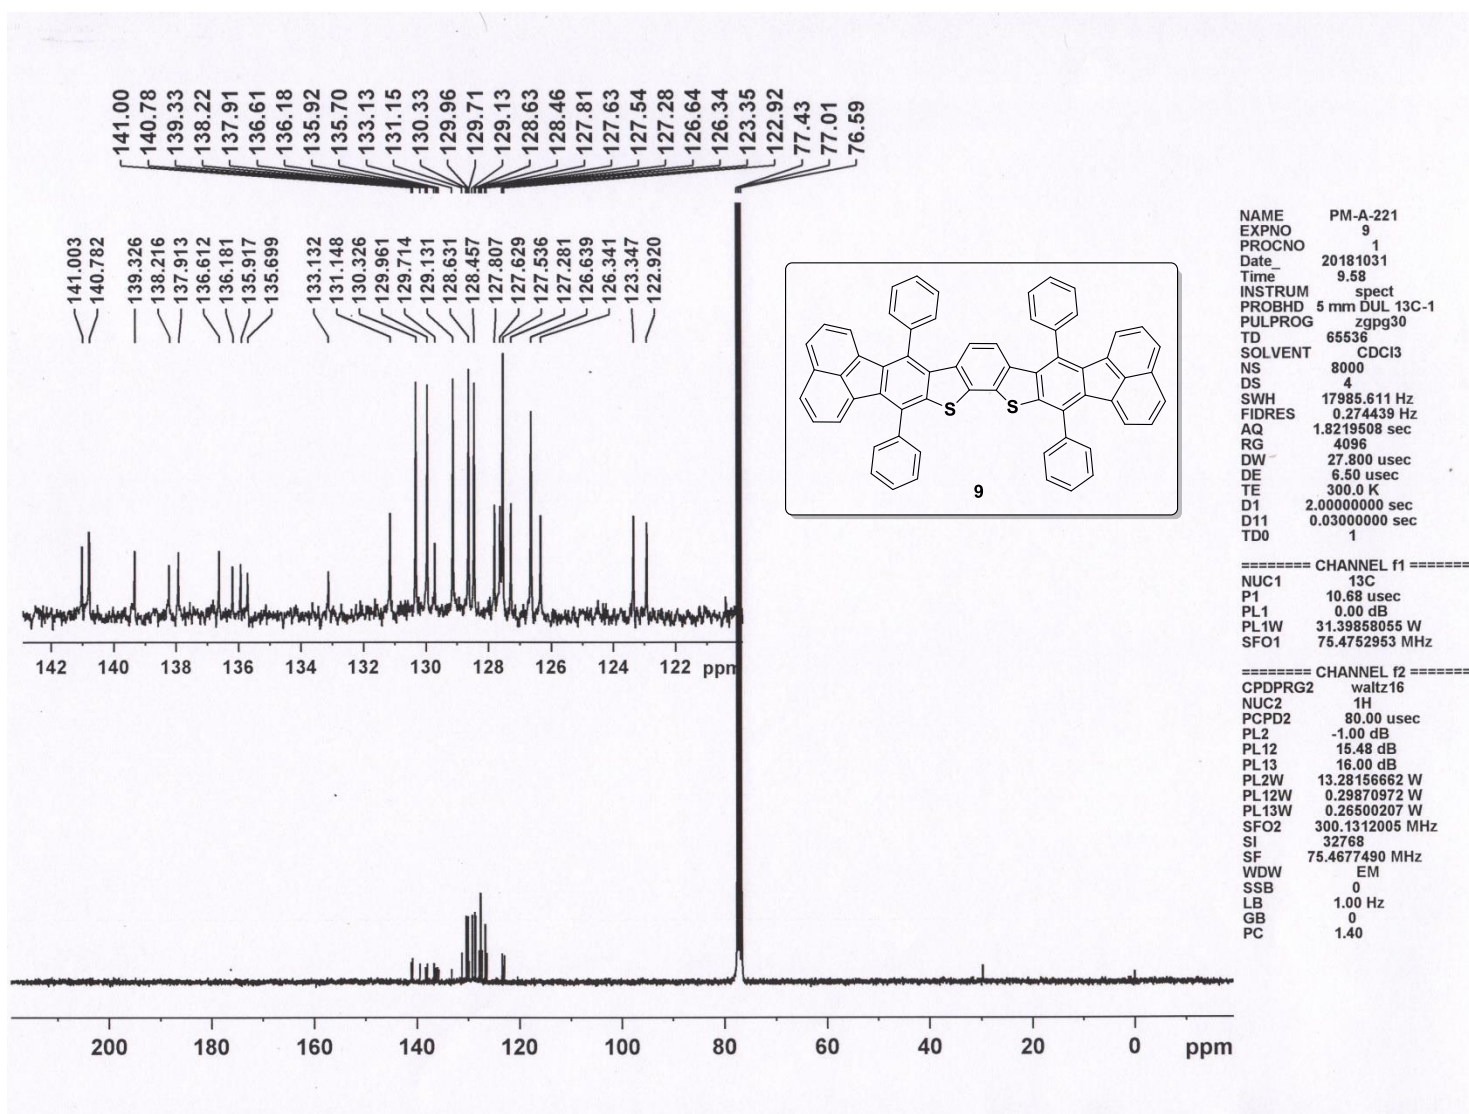

<sup>13</sup>C-NMR (75 MHz, CDCl<sub>3</sub>) spectrum of compound **9**

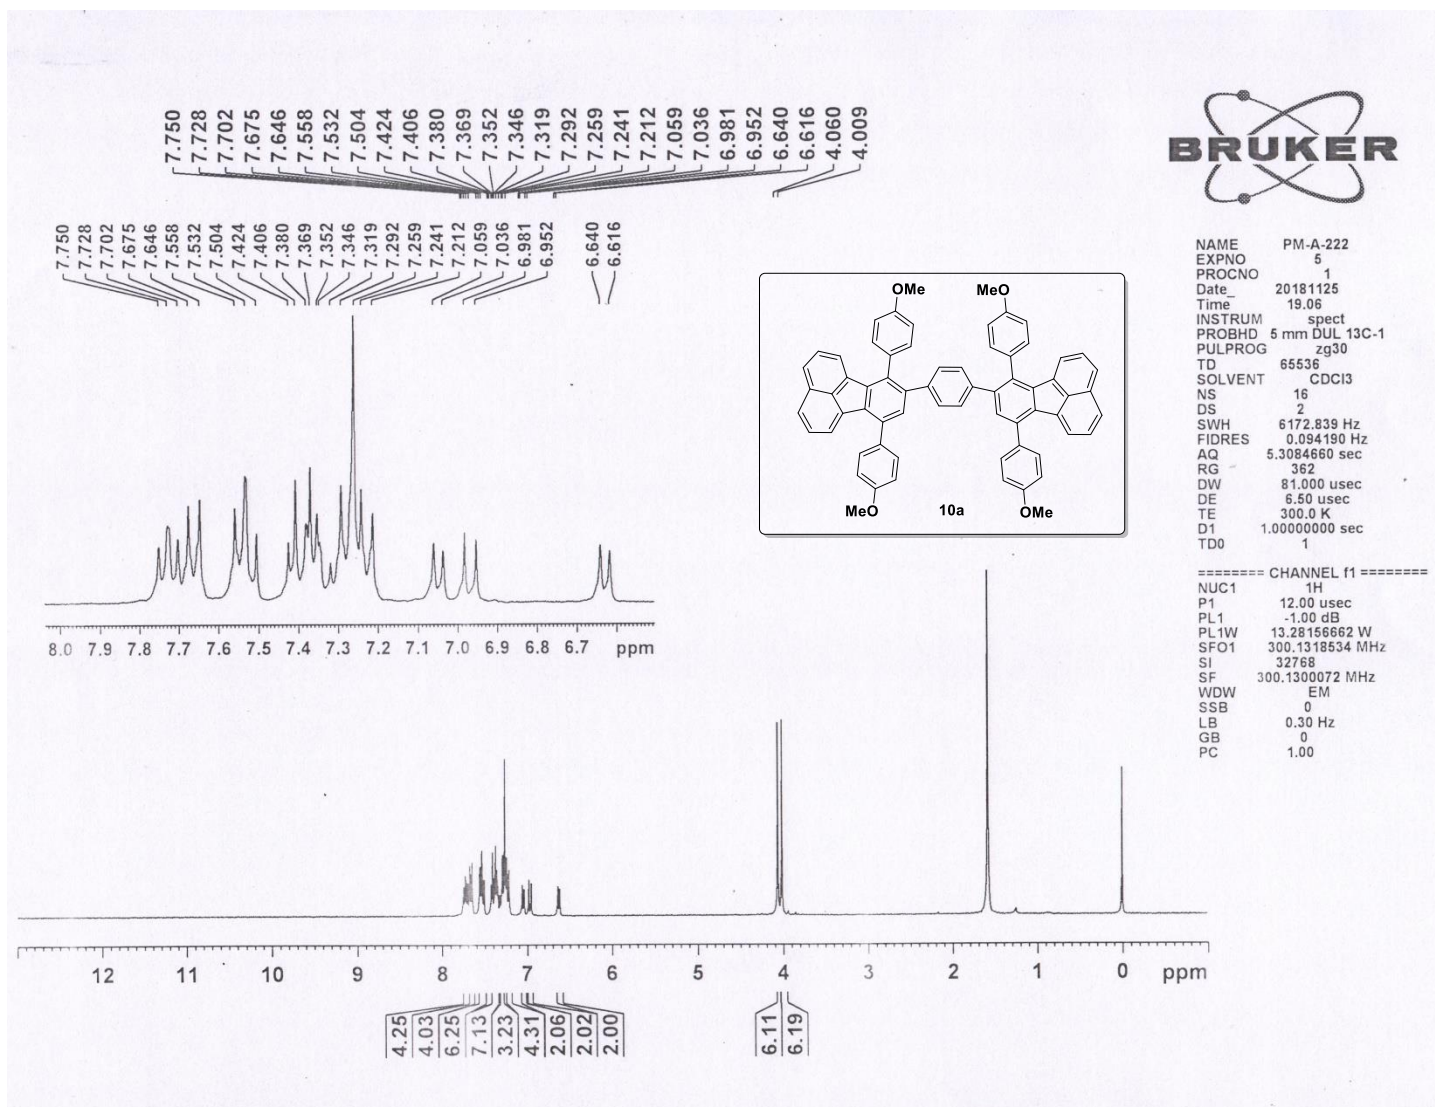

<sup>1</sup>H-NMR (300 MHz, CDCl<sub>3</sub>) spectrum of compound **10a**

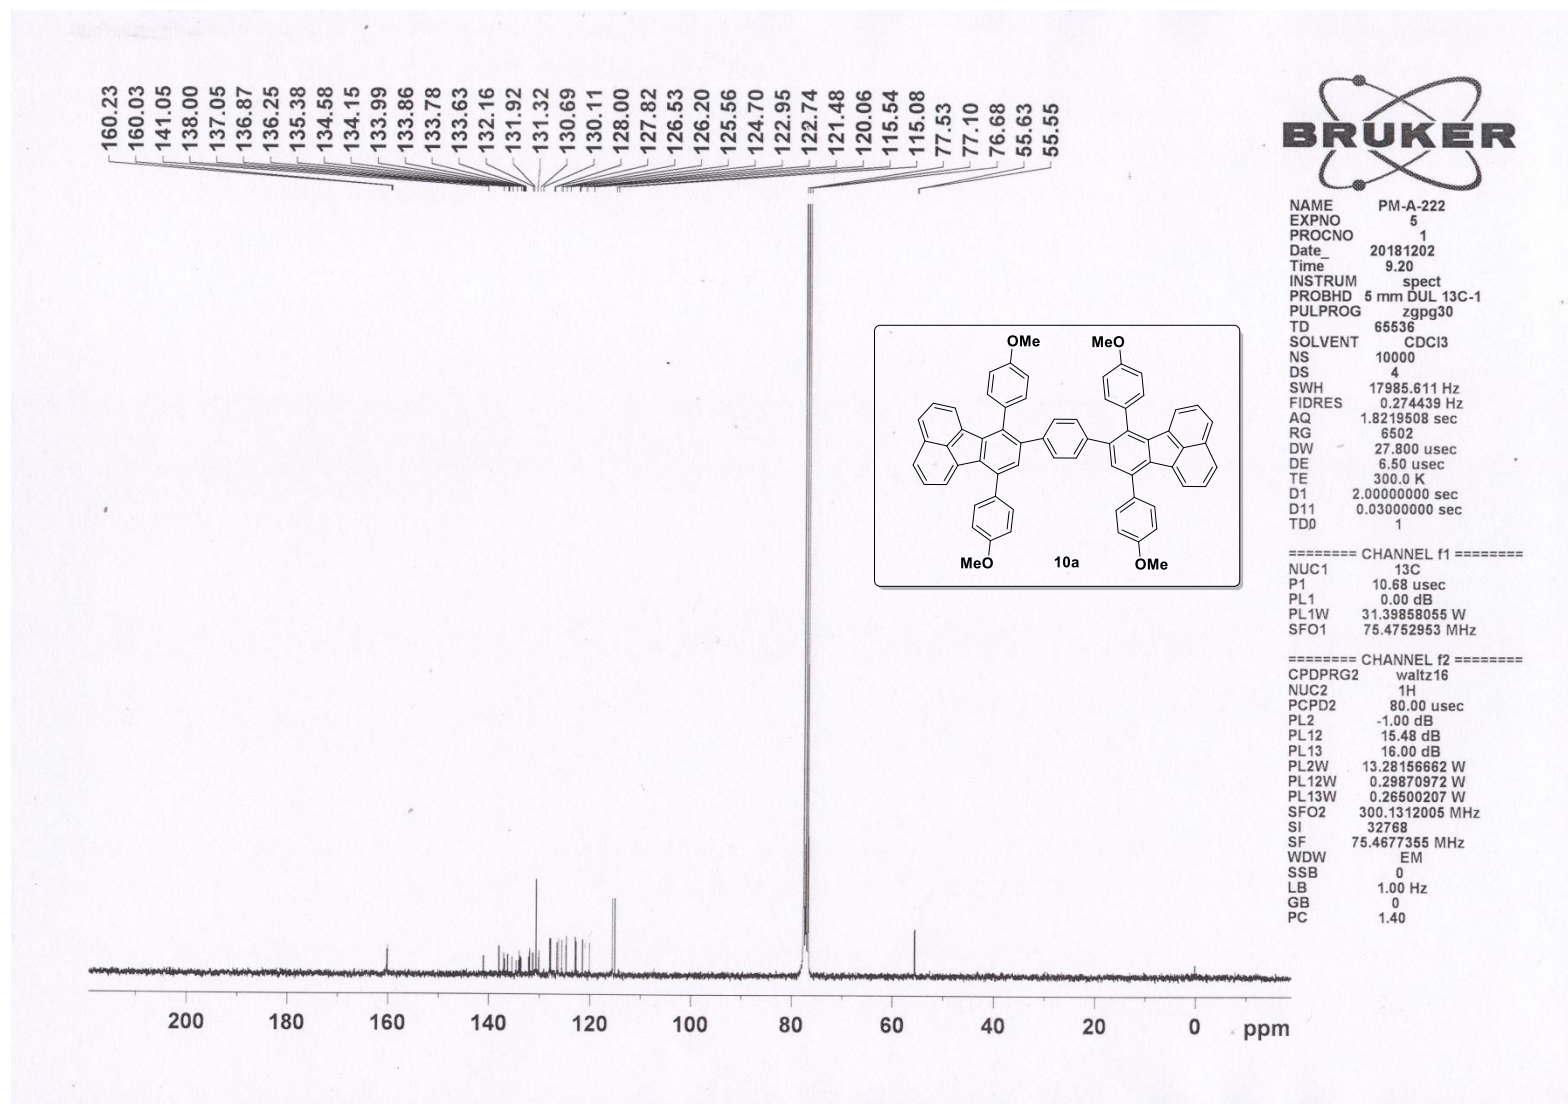

<sup>13</sup>C-NMR (75 MHz, CDCl<sub>3</sub>) spectrum of compound **10a**



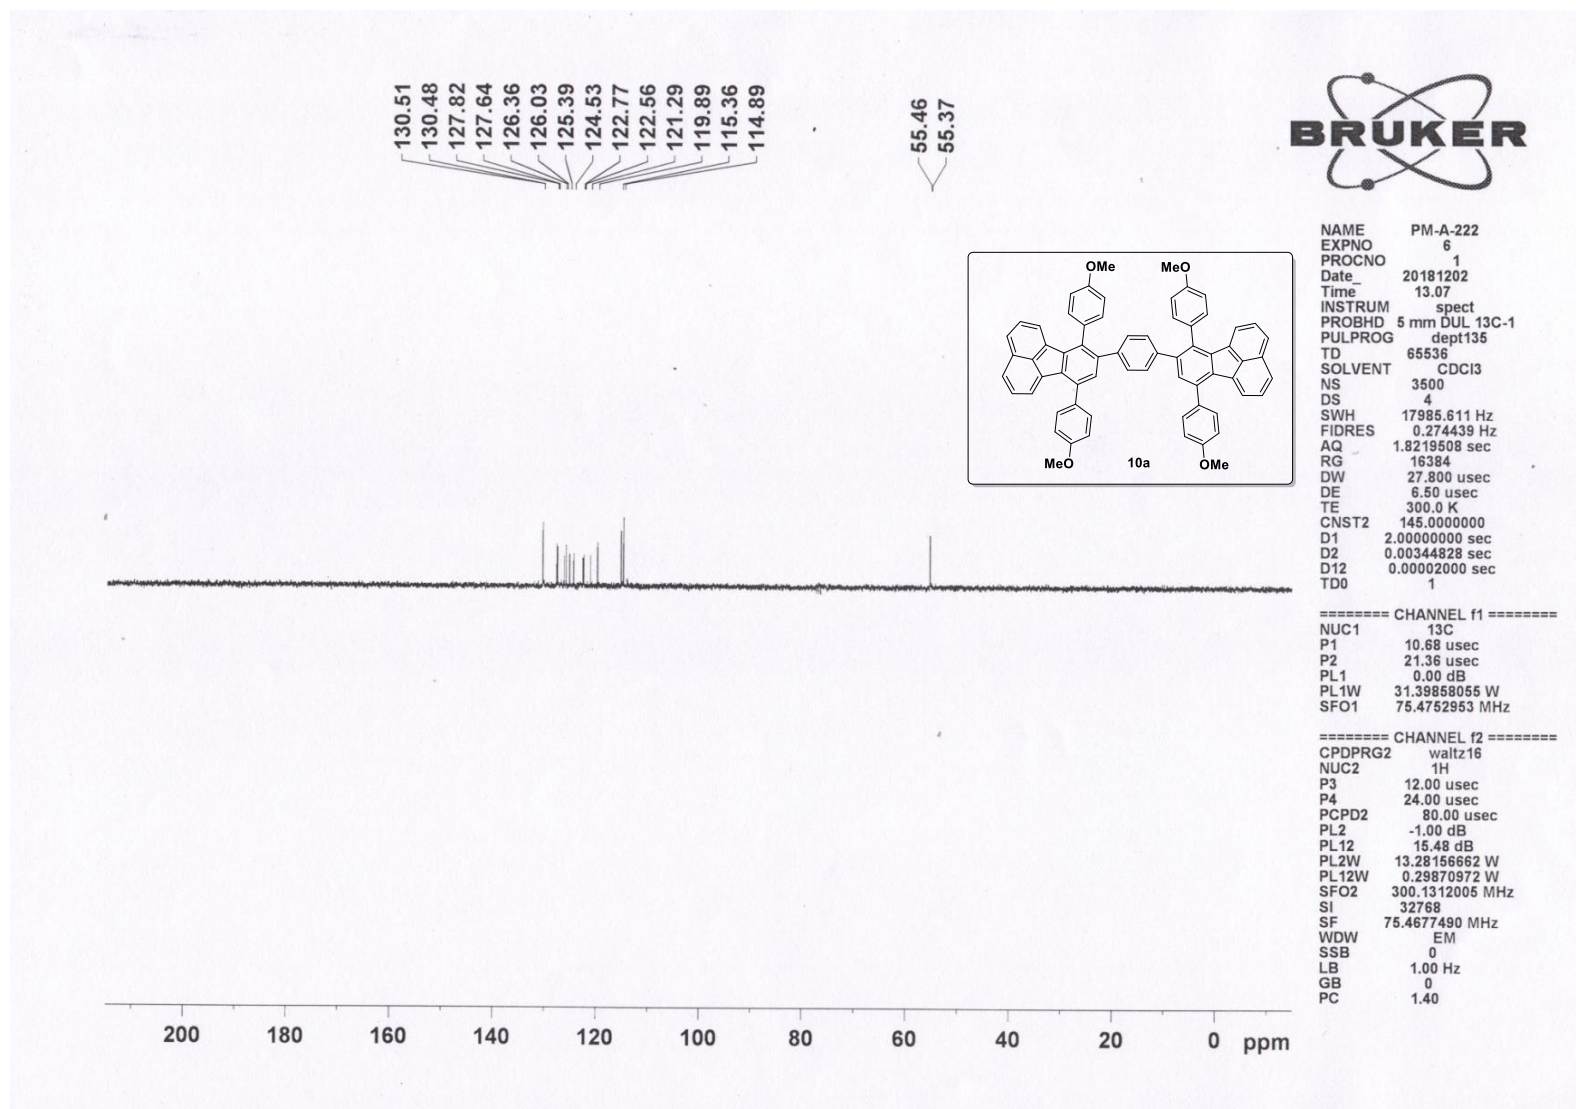

DEPT-135NMR (75 MHz, CDCl<sub>3</sub>) spectrum of compound **10a**



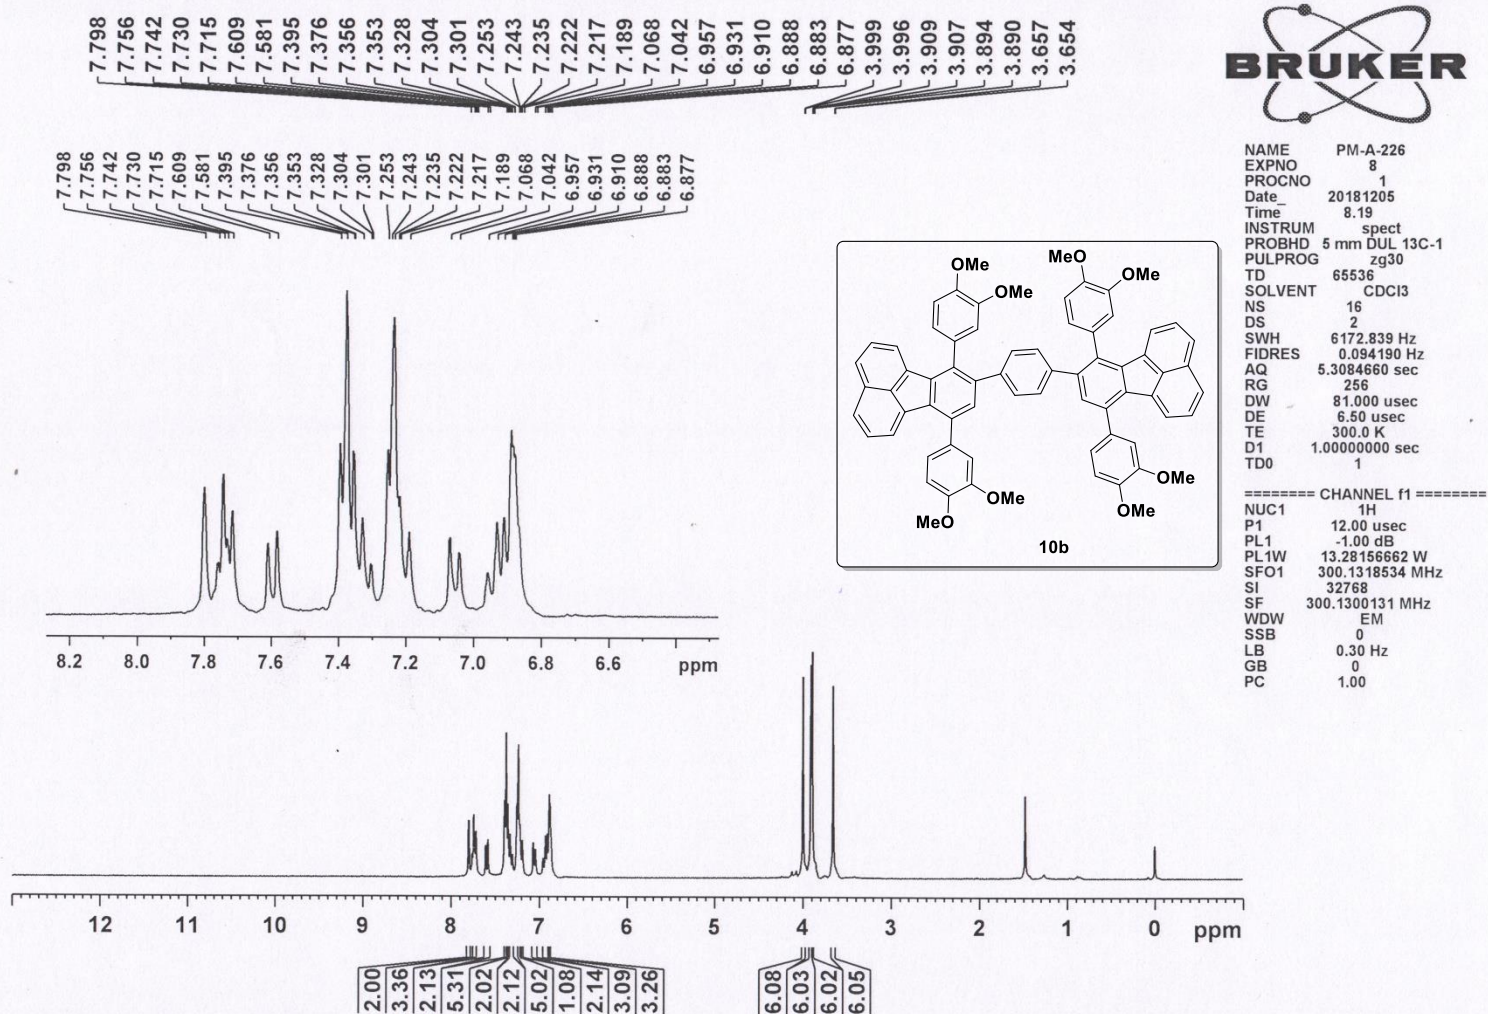

<sup>1</sup>H-NMR (300 MHz, CDCl<sub>3</sub>) spectrum of compound **10b**

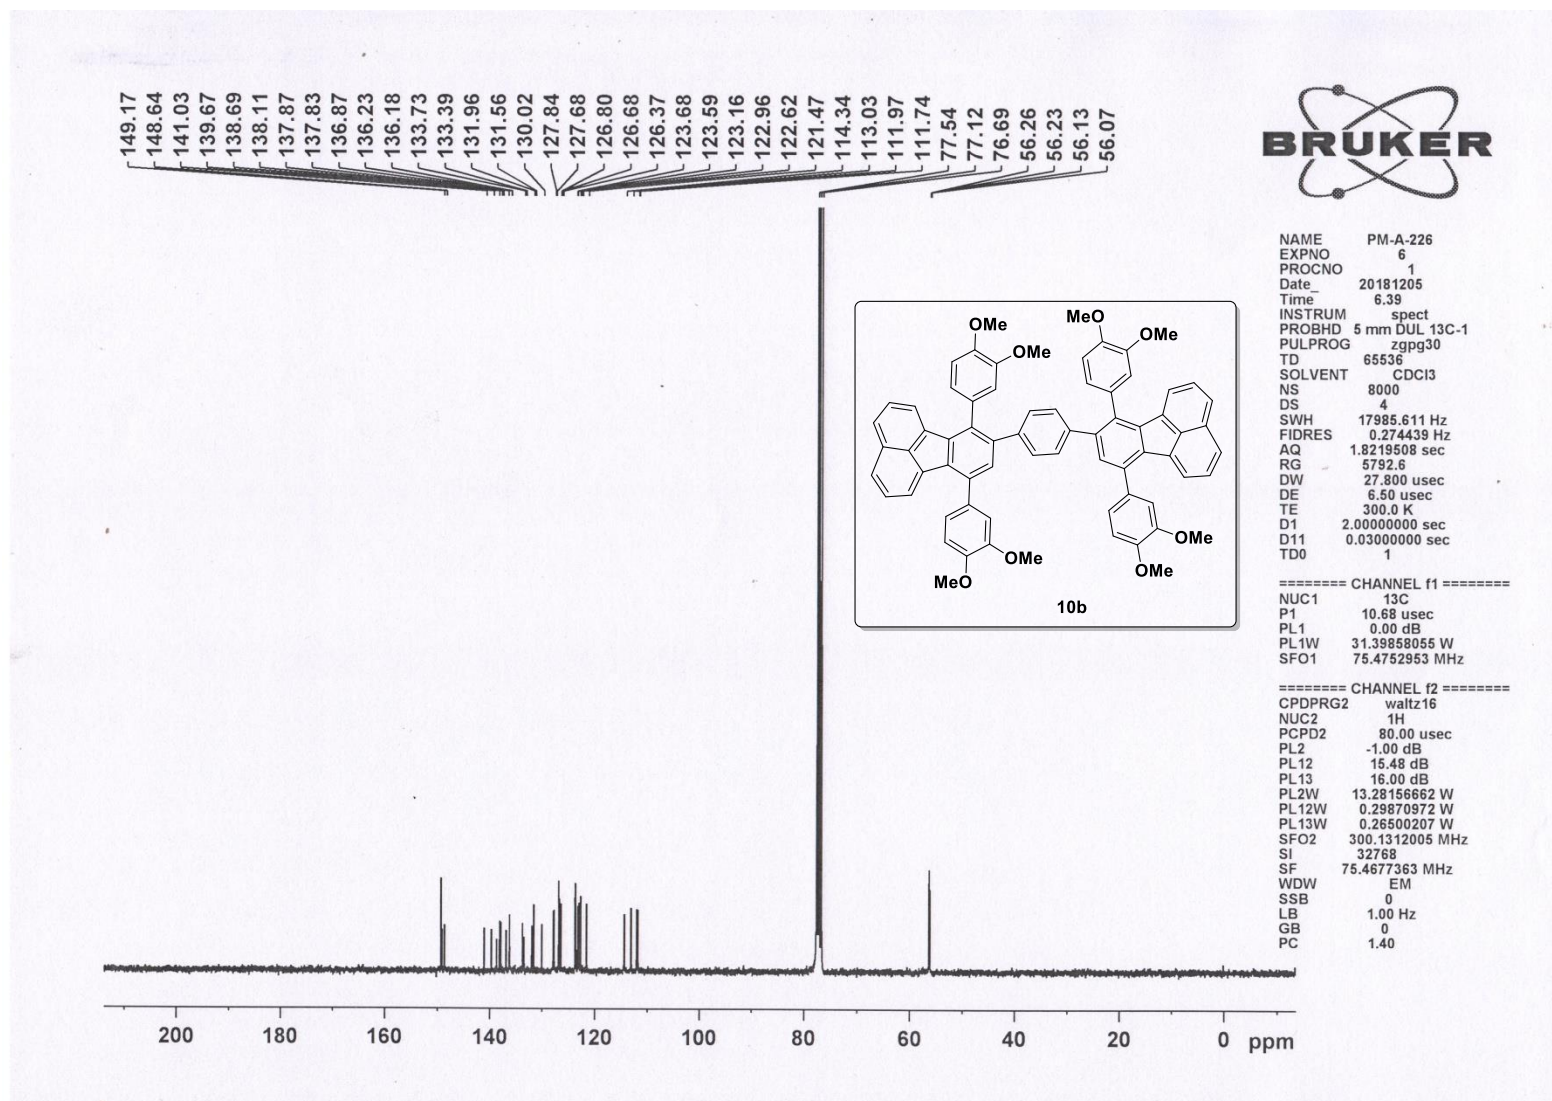

<sup>13</sup>C-NMR (75 MHz, CDCl<sub>3</sub>) spectrum of compound **10b**



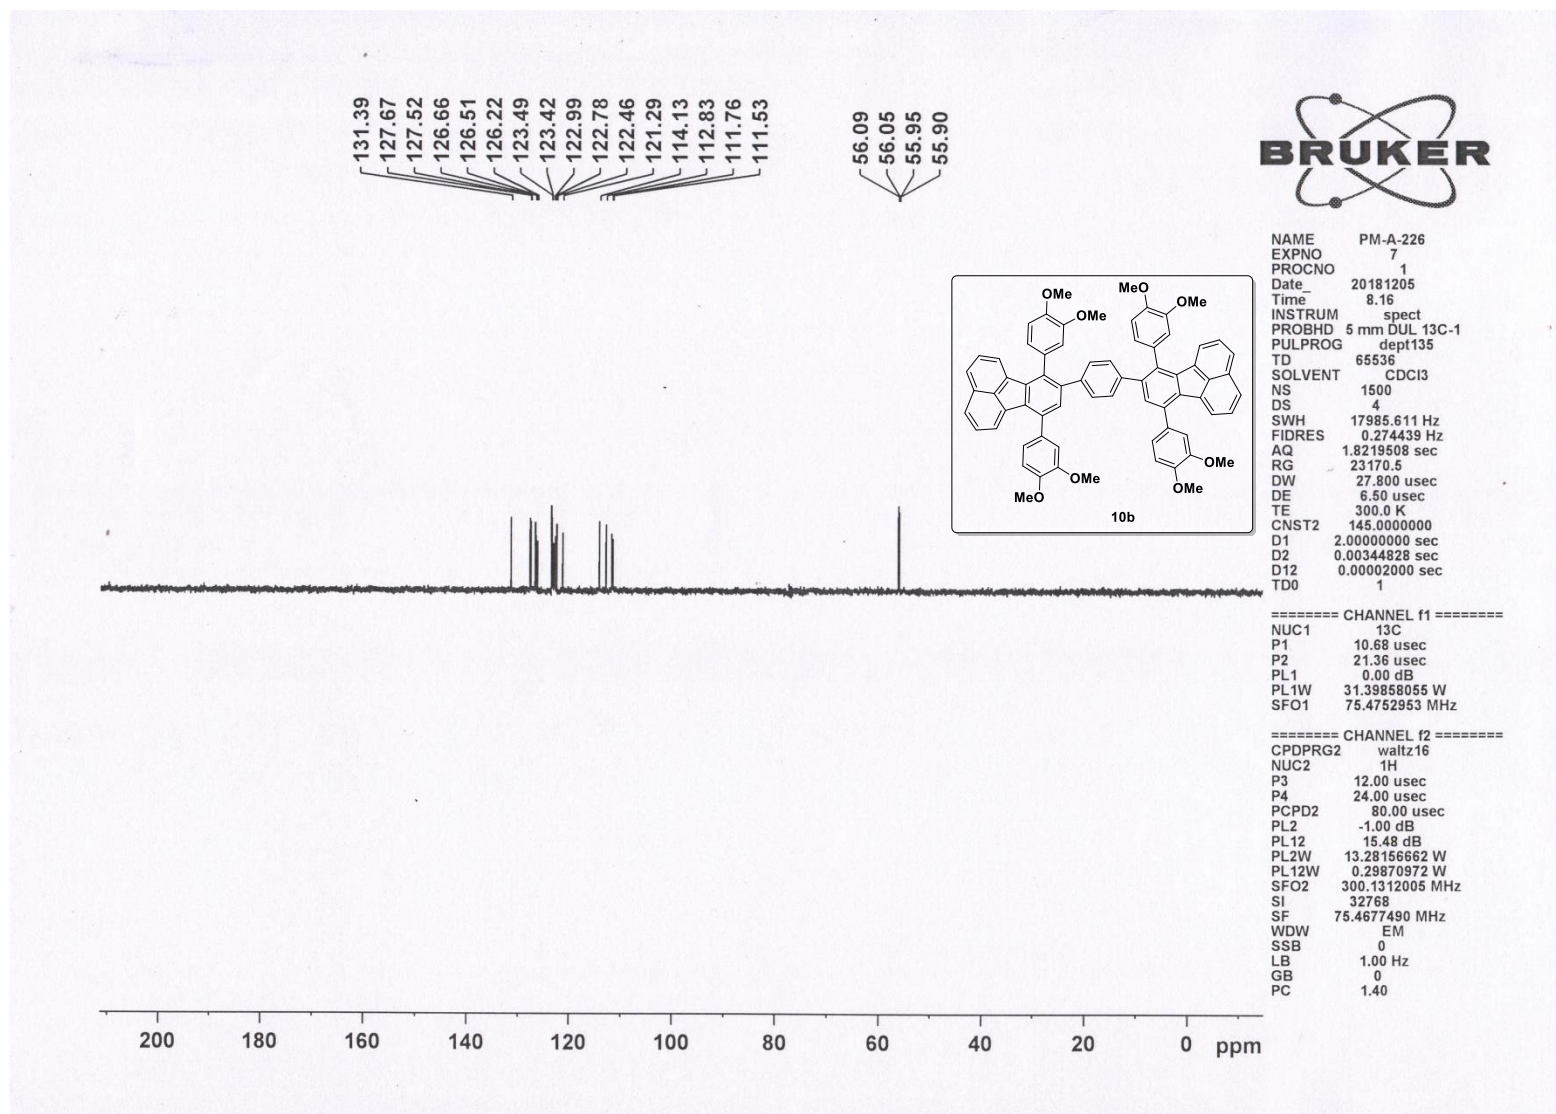

DEPT-135 NMR (75 MHz, CDCl<sub>3</sub>) spectrum of compound **10b**

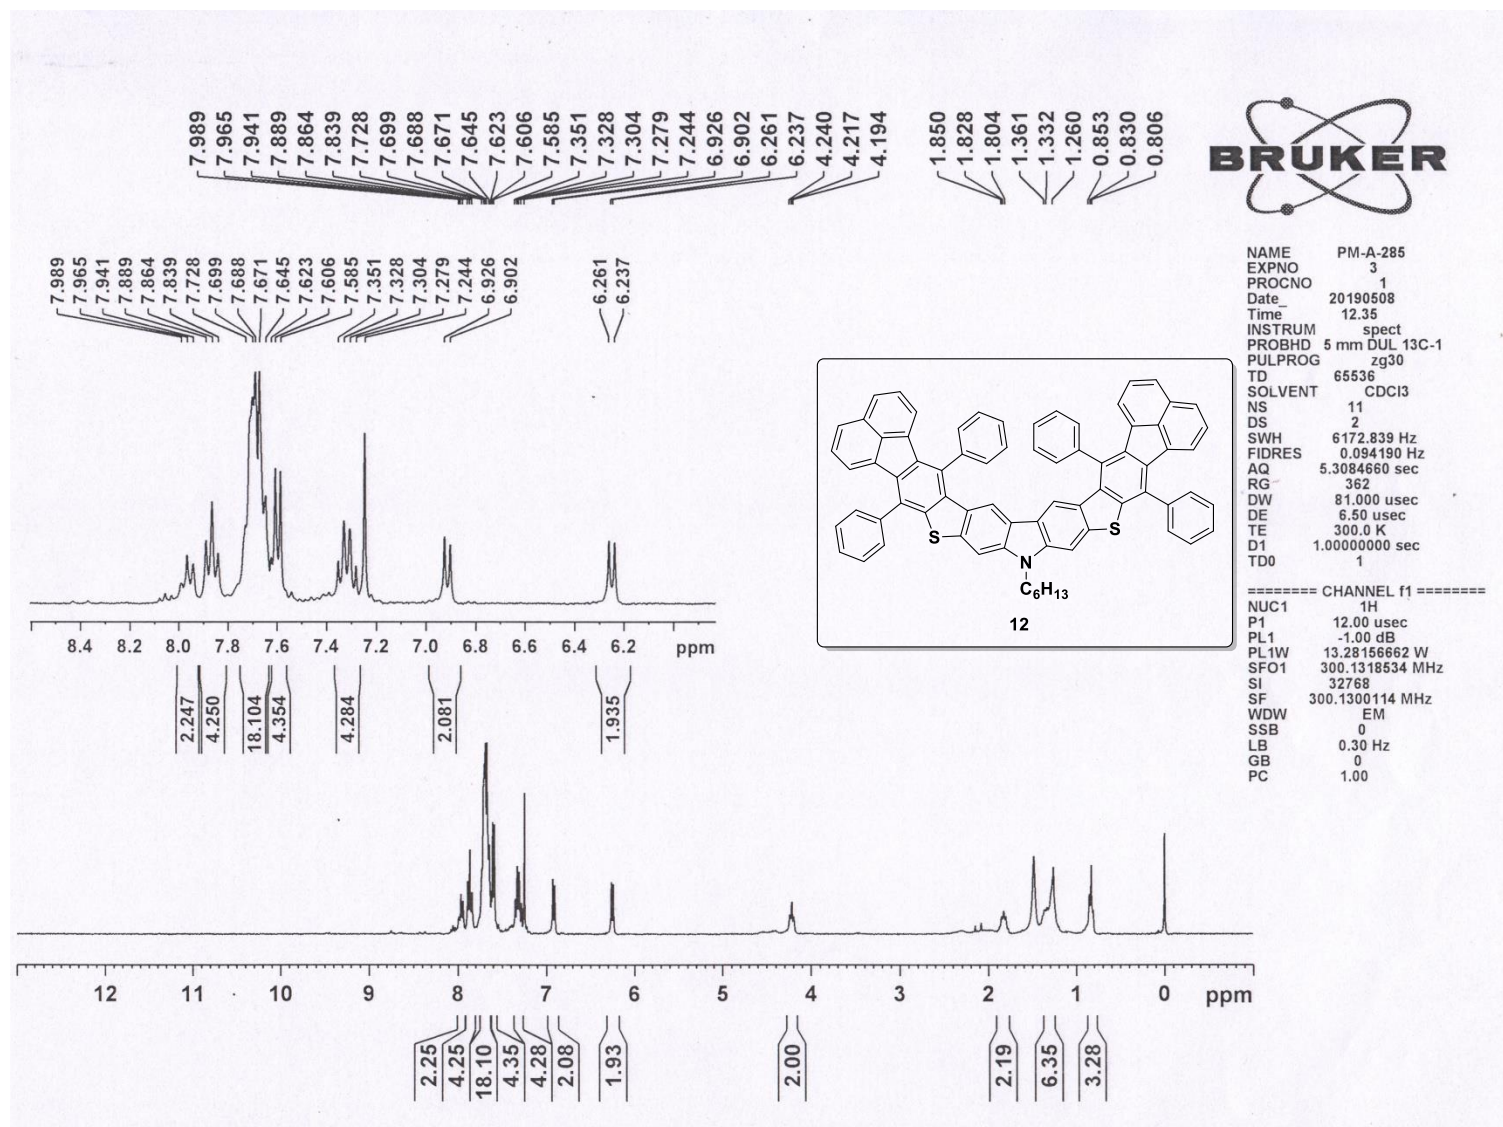

<sup>1</sup>H-NMR (300 MHz, CDCl<sub>3</sub>) spectrum of compound **12**





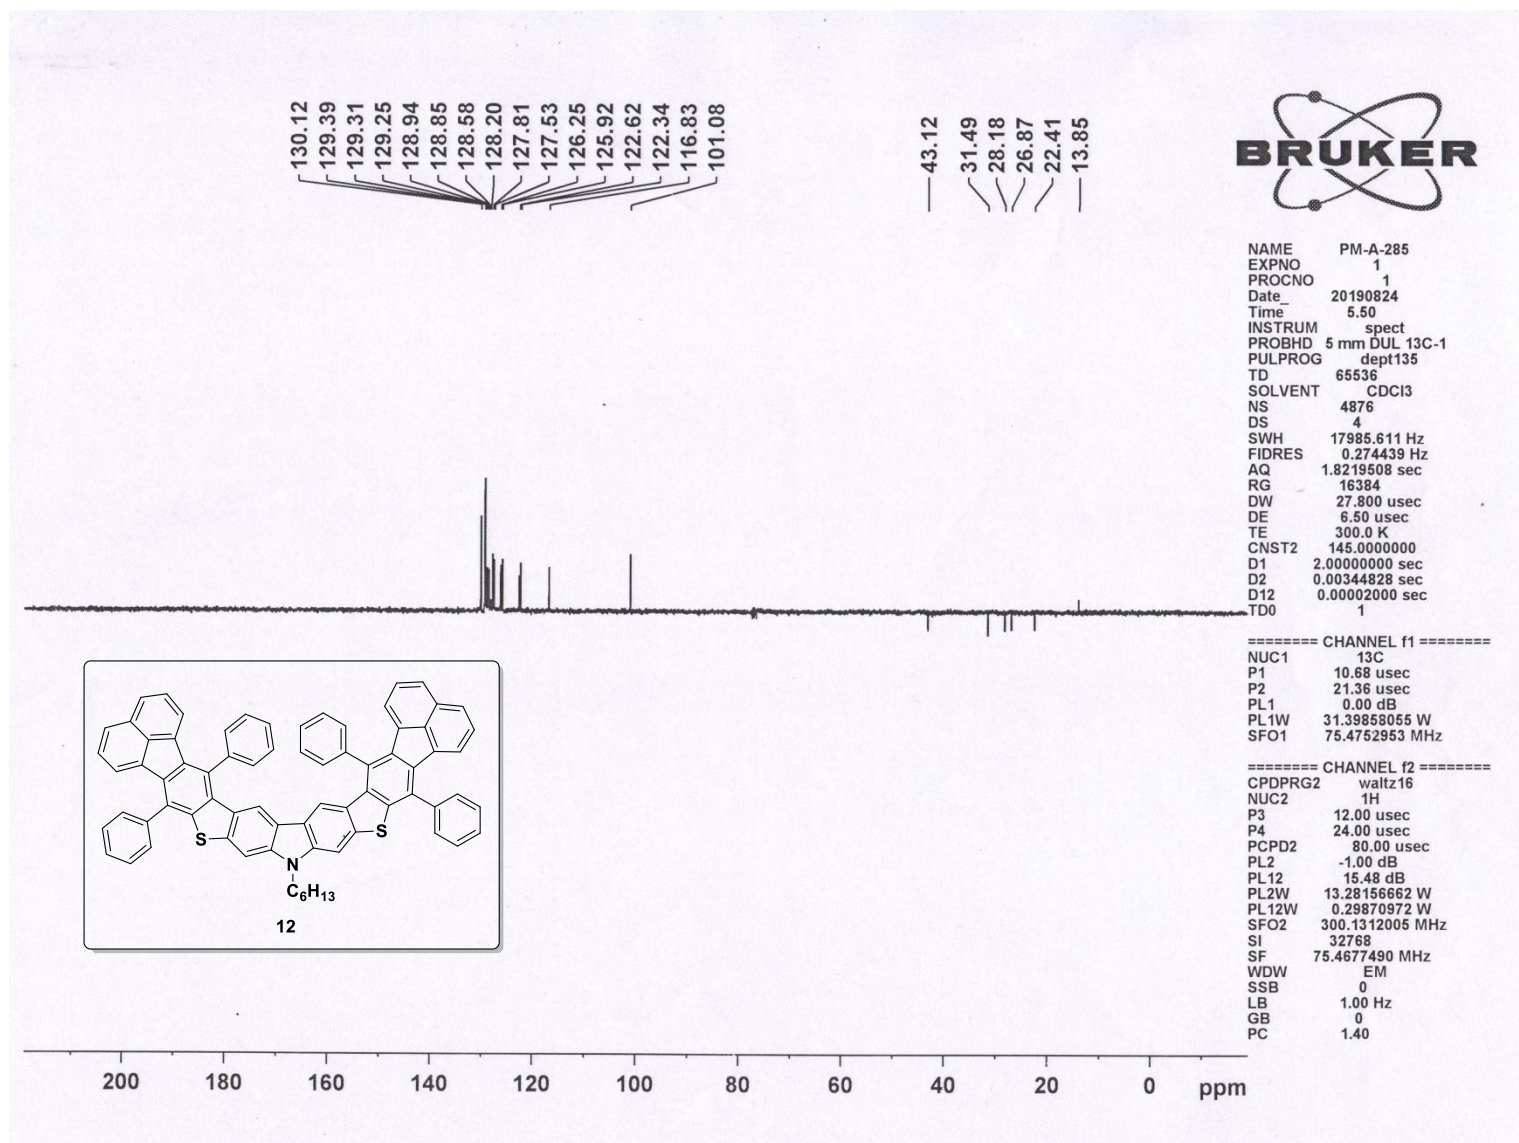

DEPT-135 (75 MHz, CDCl<sub>3</sub>) NMR spectrum of compound **12**

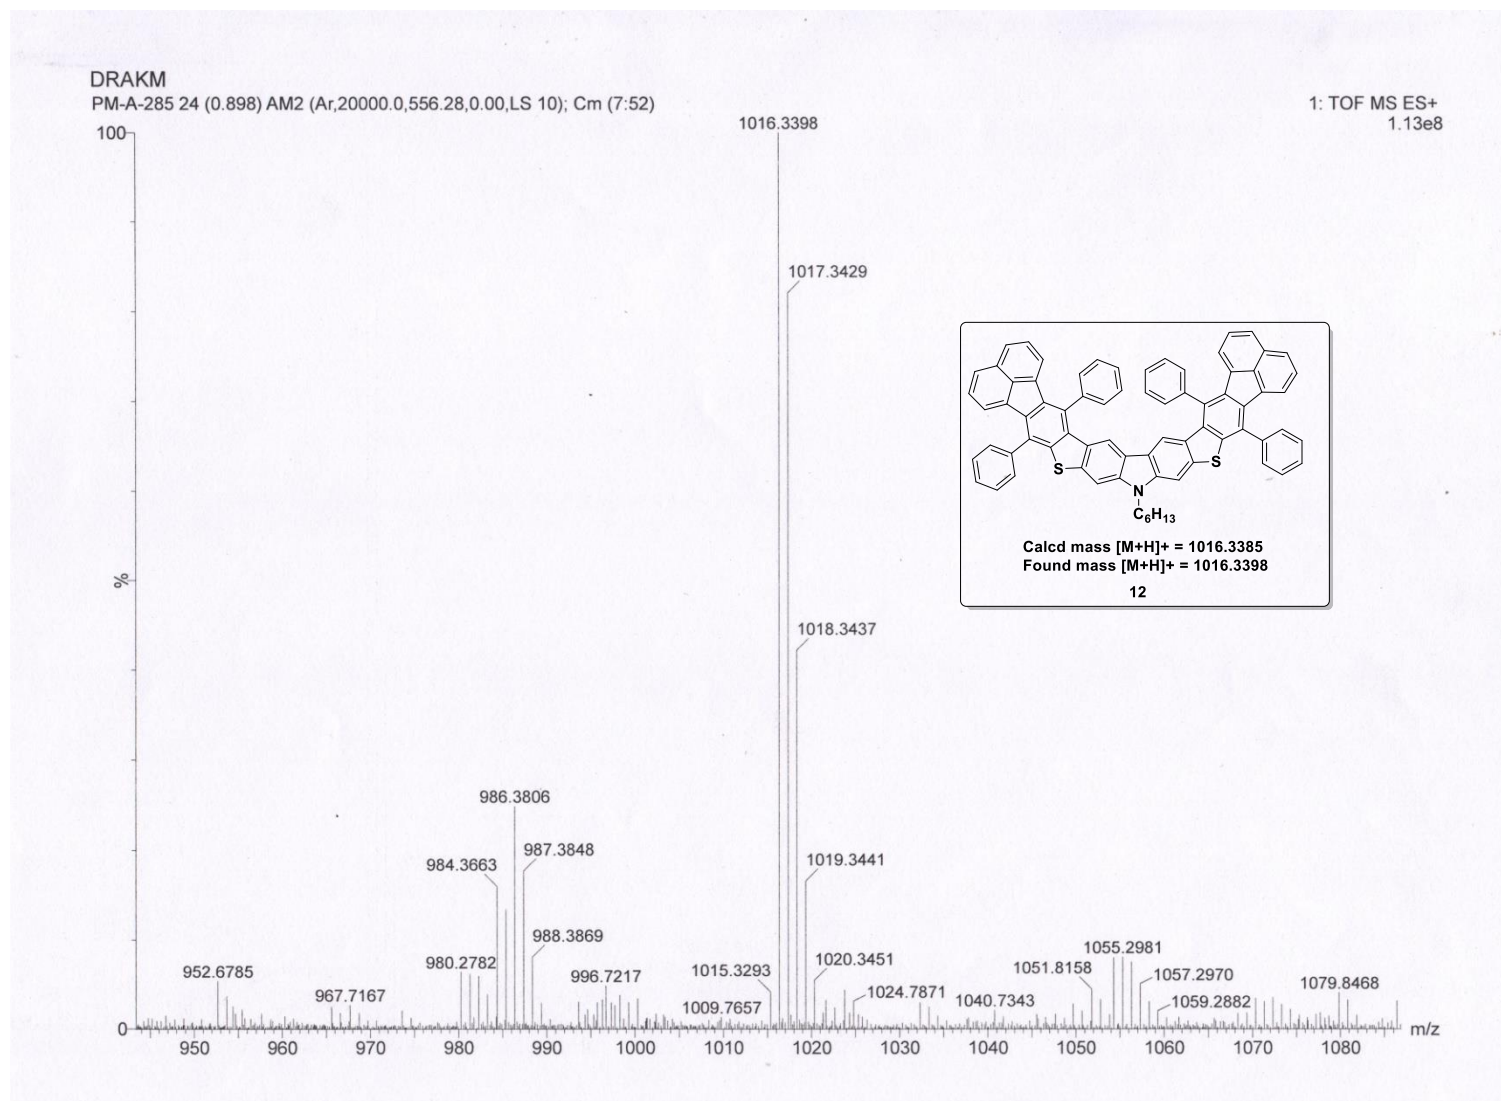

HRMS spectrum of compound **12**



## 5. X-Ray Structure & Crystallographic data of 3e, 4a and 4c

Crystallographic data of 7,13-diphenylbenzo[*d*]fluorantheno[8,9-*b*]thiophene 3e:

CCDC Number is 1891300.

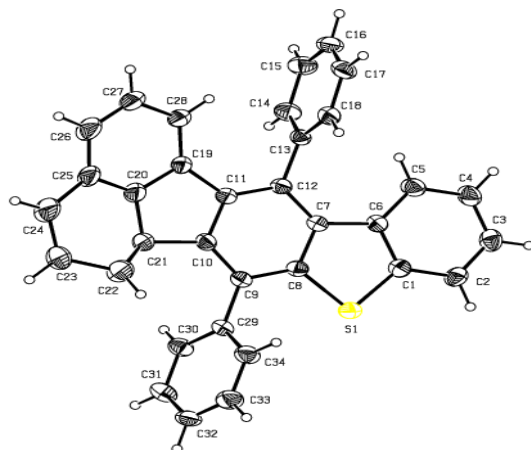

### Computing Details

Data collection: *APEX2* (Bruker, 2012); cell refinement: *APEX2/SAINT* (Bruker, 2012); data reduction: *SAINT/XPREF* (Bruker, 2012); program(s) used to solve structure: *SHELXS1997* (Sheldrick, 2008); program(s) used to refine structure: *SHELXL2014/7* (Sheldrick, 2014); molecular graphics: *ORTEP-3 for Windows* (Farrugia, 2012); software used to prepare material for publication: *SHELXL2014/7* (Sheldrick, 2014).

### 7,13-Diphenylbenzo[*d*]fluorantheno[8,9-*b*]thiophene 3e

### Experimental

#### Crystal data

|                                |                                                         |
|--------------------------------|---------------------------------------------------------|
| $C_{34}H_{20}S$                | $F(000) = 960$                                          |
| $M_r = 460.56$                 | $D_x = 1.266 \text{ Mg m}^{-3}$                         |
| Monoclinic, $P2_1/c$           | Mo $K\alpha$ radiation, $\lambda = 0.71073 \text{ \AA}$ |
| $a = 10.7856 (6) \text{ \AA}$  | Cell parameters from 26342 reflections                  |
| $b = 24.1392 (14) \text{ \AA}$ | $\theta = 2.4\text{--}22.5^\circ$                       |
| $c = 9.3144 (6) \text{ \AA}$   | $\mu = 0.16 \text{ mm}^{-1}$                            |
| $\beta = 94.959 (2)^\circ$     | $T = 293 \text{ K}$                                     |
| $V = 2416.0 (2) \text{ \AA}^3$ | BLOCK, colorless                                        |
| $Z = 4$                        | $0.25 \times 0.20 \times 0.15 \text{ mm}$               |

#### Data collection



|                                                       |                                                                        |
|-------------------------------------------------------|------------------------------------------------------------------------|
| Bruker Kappa APEXII CCD diffractometer                | 2838 reflections with $I > 2\sigma(I)$                                 |
| Radiation source: fine-focus sealed tube              | $R_{\text{int}} = 0.050$                                               |
| $\omega$ and $\phi$ scan                              | $\theta_{\text{max}} = 26.0^\circ$ , $\theta_{\text{min}} = 2.1^\circ$ |
| Absorption correction: multi-scan <i>SADABS2012/1</i> | $h = -13 \rightarrow 13$                                               |
| $T_{\text{min}} = 0.888$ , $T_{\text{max}} = 0.945$   | $k = -29 \rightarrow 29$                                               |
| 25863 measured reflections                            | $l = -11 \rightarrow 10$                                               |
| 4727 independent reflections                          |                                                                        |

## Refinement

|                                 |                                                                                     |
|---------------------------------|-------------------------------------------------------------------------------------|
| Refinement on $F^2$             | 6 restraints                                                                        |
| Least-squares matrix: full      | Hydrogen site location: inferred from neighbouring sites                            |
| $R[F^2 > 2\sigma(F^2)] = 0.061$ | H-atom parameters constrained                                                       |
| $wR(F^2) = 0.201$               | $w = 1/[\sigma^2(F_o^2) + (0.0971P)^2 + 1.4204P]$<br>where $P = (F_o^2 + 2F_c^2)/3$ |
| $S = 1.03$                      | $(\Delta/\sigma)_{\text{max}} < 0.001$                                              |
| 4727 reflections                | $\Delta\rho_{\text{max}} = 0.79 \text{ e } \text{\AA}^{-3}$                         |
| 316 parameters                  | $\Delta\rho_{\text{min}} = -0.27 \text{ e } \text{\AA}^{-3}$                        |

## Special details

*Geometry.* All e.s.d.'s (except the e.s.d. in the dihedral angle between two l.s. planes) are estimated using the full covariance matrix. The cell e.s.d.'s are taken into account individually in the estimation of e.s.d.'s in distances, angles and torsion angles; correlations between e.s.d.'s in cell parameters are only used when they are defined by crystal symmetry. An approximate (isotropic) treatment of cell e.s.d.'s is used for estimating e.s.d.'s involving l.s. planes.

## Crystallographic data of 7,10-bis(4-methoxyphenyl)-8-phenylfluoranthene 4a:

CCDC Number is 1960428.

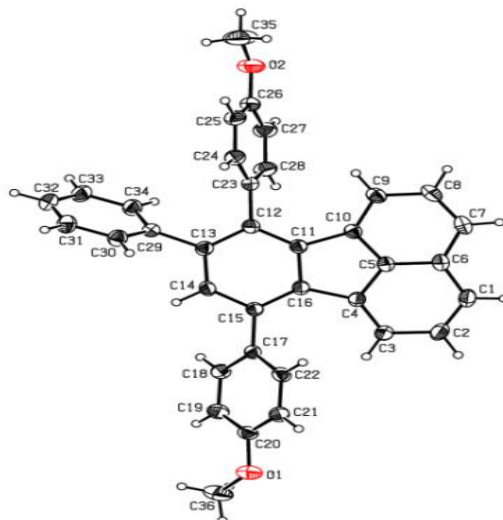

## Computing Details

Data collection: SHELXS97 (Sheldrick, 1990), SHELXL97 (Sheldrick, 1997).

## 7,10-Bis(4-methoxyphenyl)-8-phenylfluoranthene 4a

## Experimental

### Crystal data

|                                 |                                                         |
|---------------------------------|---------------------------------------------------------|
| $C_{36}H_{26}O_2$               | $Z = 2$                                                 |
| $M_r = 490.57$                  | $F(000) = 516$                                          |
| Triclinic, $P1$                 | $D_x = 1.251 \text{ Mg m}^{-3}$                         |
| Hall symbol: $-P 1$             | Mo $K\alpha$ radiation, $\lambda = 0.71073 \text{ \AA}$ |
| $a = 10.4170 (3) \text{ \AA}$   | Cell parameters from 5383 reflections                   |
| $b = 11.3442 (4) \text{ \AA}$   | $\theta = 2.0\text{--}26.5^\circ$                       |
| $c = 12.5770 (4) \text{ \AA}$   | $\mu = 0.08 \text{ mm}^{-1}$                            |
| $\alpha = 108.867 (2)^\circ$    | $T = 296 \text{ K}$                                     |
| $\beta = 105.293 (3)^\circ$     | Block, colourless                                       |
| $\gamma = 99.814 (4)^\circ$     | $0.35 \times 0.30 \times 0.25 \text{ mm}$               |
| $V = 1302.26 (7) \text{ \AA}^3$ |                                                         |

Data collection

|                                                                |                                                                        |
|----------------------------------------------------------------|------------------------------------------------------------------------|
| Bruker Kappa ApexII CCD diffractometer                         | 5383 independent reflections                                           |
| Radiation source: fine-focus sealed tube                       | 3166 reflections with $I > 2\sigma(I)$                                 |
| Graphite monochromator                                         | $R_{\text{int}} = 0.041$                                               |
| $\omega$ & $\varphi$ scans                                     | $\theta_{\text{max}} = 26.5^\circ$ , $\theta_{\text{min}} = 2.0^\circ$ |
| Absorption correction: multi-scan <i>SADABS</i> (Bruker, 2008) | $h = -13 \rightarrow 12$                                               |
| $T_{\text{min}} = 0.974$ , $T_{\text{max}} = 0.981$            | $k = -14 \rightarrow 14$                                               |
| 26328 measured reflections                                     | $l = -15 \rightarrow 15$                                               |

## Refinement

|                                 |                                                                |
|---------------------------------|----------------------------------------------------------------|
| Refinement on $F^2$             | Primary atom site location: structure-invariant direct methods |
| Least-squares matrix: full      | Secondary atom site location: difference Fourier map           |
| $R[F^2 > 2\sigma(F^2)] = 0.047$ | Hydrogen site location: inferred from neighbouring sites       |
| $wR(F^2) = 0.143$               | H-atom parameters constrained                                  |
| $S = 1.01$                      | $w = 1/[\sigma^2(F_o^2) + (0.0697P)^2 + 0.1956P]$              |
| 5383 reflections                | where $P = (F_o^2 + 2F_c^2)/3$                                 |
| 345 parameters                  | $(\Delta/\sigma)_{\text{max}} < 0.001$                         |
| 0 restraints                    | $\Delta\rho_{\text{max}} = 0.17 \text{ e } \text{\AA}^{-3}$    |
|                                 | $\Delta\rho_{\text{min}} = -0.23 \text{ e } \text{\AA}^{-3}$   |

## Special details

*Geometry.* All e.s.d.'s (except the e.s.d. in the dihedral angle between two l.s. planes) are estimated using the full covariance matrix. The cell e.s.d.'s are taken into account individually in the estimation of e.s.d.'s in distances, angles and torsion angles; correlations between e.s.d.'s in cell parameters are only used when they are defined by crystal symmetry. An approximate (isotropic) treatment of cell e.s.d.'s is used for estimating e.s.d.'s involving l.s. planes.

*Refinement.* Refinement of  $F^2$  against ALL reflections. The weighted  $R$ -factor  $wR$  and goodness of fit  $S$  are based on  $F^2$ , conventional  $R$ -factors  $R$  are based on  $F$ , with  $F$  set to zero for negative  $F^2$ . The threshold expression of  $F^2 > \sigma(F^2)$  is used only for calculating  $R$ -factors(gt) *etc.* and is not relevant to the choice of reflections for refinement.  $R$ -factors based on  $F^2$  are statistically about twice as large as those based on  $F$ , and  $R$ -factors based on ALL data will be even larger.

## Crystallographic data of 2,2'-(8-phenylfluorathene-7,10-diyl)dithiophene 4c:

CCDC Number is **1891974**.

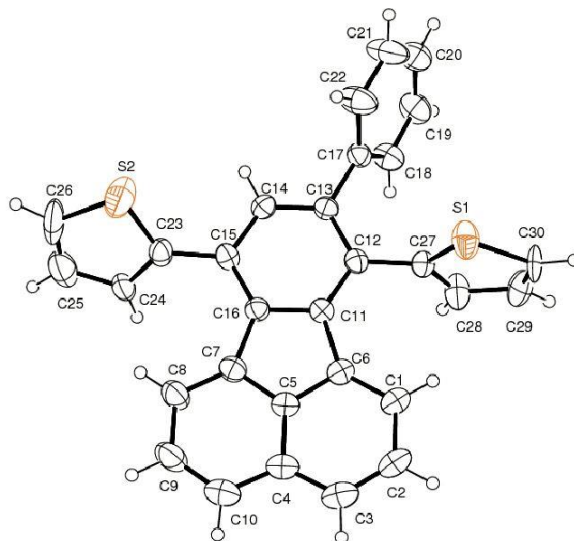

## Computing Details

Data collection: *APEX2* (Bruker, 2004); cell refinement: *APEX2/SAINT* (Bruker, 2004); data reduction: *SAINT/XPREF* (Bruker, 2004); program(s) used to solve structure: *SHELXT2014/4* (Sheldrick, 2014); program(s) used to refine structure: *SHELXL2014/7* (Sheldrick, 2014); molecular graphics: *ORTEP-3* (Farrugia, 1997) and *Mercury* (Bruno *et al.*, 2002); software used to prepare material for publication: *SHELXL2014/7* (Sheldrick, 2014).

## 2,2'-(8-Phenylfluorathene-7,10-diyl)dithiophene 4c

## Experimental

### Crystal data

|                                |                                                         |
|--------------------------------|---------------------------------------------------------|
| $C_{30}H_{18}S_2$              | $F(000) = 920$                                          |
| $M_r = 442.56$                 | $D_x = 1.330 \text{ Mg m}^{-3}$                         |
| Monoclinic, $P2_1/c$           | Mo $K\alpha$ radiation, $\lambda = 0.71073 \text{ \AA}$ |
| $a = 11.7855 (11) \text{ \AA}$ | Cell parameters from 4488 reflections                   |
| $b = 9.5702 (7) \text{ \AA}$   | $\theta = 2.5\text{--}21.8^\circ$                       |
| $c = 19.7443 (17) \text{ \AA}$ | $\mu = 0.26 \text{ mm}^{-1}$                            |
| $\beta = 96.996 (4)^\circ$     | $T = 296 \text{ K}$                                     |



|                                |                                           |
|--------------------------------|-------------------------------------------|
| $V = 2210.4 (3) \text{ \AA}^3$ | Block, colourless                         |
| $Z = 4$                        | $0.15 \times 0.15 \times 0.10 \text{ mm}$ |

### Data collection

|                                                                |                                                                        |
|----------------------------------------------------------------|------------------------------------------------------------------------|
| Bruker axs kappa apex2 CCD Diffractometer                      | 3883 independent reflections                                           |
| Radiation source: fine-focus sealed tube                       | 2074 reflections with $I > 2\sigma(I)$                                 |
| Graphite monochromator                                         | $R_{\text{int}} = 0.076$                                               |
| $\omega$ and $\phi$ scan                                       | $\theta_{\text{max}} = 25.0^\circ$ , $\theta_{\text{min}} = 2.1^\circ$ |
| Absorption correction: multi-scan <i>SADABS</i> (Bruker, 2004) | $h = -14 \rightarrow 14$                                               |
| $T_{\text{min}} = 0.696$ , $T_{\text{max}} = 0.745$            | $k = -11 \rightarrow 11$                                               |
| 28725 measured reflections                                     | $l = -23 \rightarrow 23$                                               |

### Refinement

|                                 |                                                                                                                       |
|---------------------------------|-----------------------------------------------------------------------------------------------------------------------|
| Refinement on $F^2$             | Hydrogen site location: inferred from neighbouring sites                                                              |
| Least-squares matrix: full      | H-atom parameters constrained                                                                                         |
| $R[F^2 > 2\sigma(F^2)] = 0.055$ | $w = 1/[\sigma^2(F_o^2) + (0.102P)^2 + 0.2976P]$<br>where $P = (F_o^2 + 2F_c^2)/3$                                    |
| $wR(F^2) = 0.194$               | $(\Delta/\sigma)_{\text{max}} = 0.001$                                                                                |
| $S = 1.03$                      | $\Delta\rho_{\text{max}} = 0.22 \text{ e \AA}^{-3}$                                                                   |
| 3883 reflections                | $\Delta\rho_{\text{min}} = -0.37 \text{ e \AA}^{-3}$                                                                  |
| 327 parameters                  | Extinction correction: <i>SHELXL2014/7</i> (Sheldrick 2014, $F_c^* = kFc[1 + 0.001x\lambda^3/\sin(2\theta)]^{-1/4}$ ) |
| 131 restraints                  | Extinction coefficient: 0.0031 (12)                                                                                   |

### Special details

*Geometry.* All e.s.d.'s (except the e.s.d. in the dihedral angle between two l.s. planes) are estimated using the full covariance matrix. The cell e.s.d.'s are taken into account individually in the estimation of e.s.d.'s in distances, angles and torsion angles; correlations between e.s.d.'s in cell parameters are only used when they are defined by crystal symmetry. An approximate (isotropic) treatment of cell e.s.d.'s is used for estimating e.s.d.'s involving l.s. planes.

## 6. Computational studies

To gain insights into relative stabilities of the different radical species proposed in plausible mechanisms for deoxygenation and sulfur dioxide extrusion, DFT calculations were performed on radical species **II** and **III**. It is clearly evident from the **Figure S1**, radical **III** is more stable radical structure than **II** (total electronic energies of **III** is lower than **II** in both gas and solvent phase) and radical **II** was found to be ~30 kcal/mol (both gas and solvent phase) less stable than the radical species **III**, which was attributed to the inability of radical delocalization in **II** when compared to **III**. To further understand the plausible mechanisms, the detailed DFT calculations were performed and the results (optimized geometries of transition states and Gibbs free energy profile) are given the in the **Figure S1** and **S2**.

|                                                                                                                                                |                                                                                                                                                        |
|------------------------------------------------------------------------------------------------------------------------------------------------|--------------------------------------------------------------------------------------------------------------------------------------------------------|
| 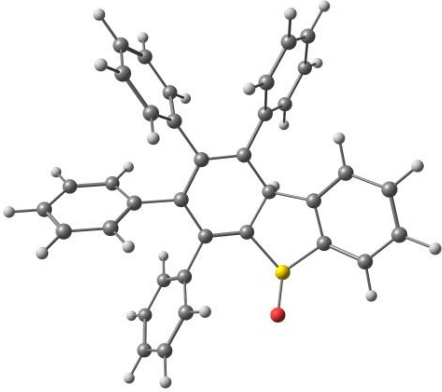 <p style="text-align: center;"><b>II</b></p>                |  <p style="text-align: center;"><b>III</b></p>                      |
| <p>E= -1860.196925 (gas phase)</p> <p>E=-1860.204035 (solvent phase)</p> <p>RE=0 kcal/mol (gas phase)</p> <p>RE=0 kcal/mol (solvent phase)</p> | <p>E= -1860.244517 (gas phase)</p> <p>E=-1860.250972 (solvent phase)</p> <p>RE=-29.9 kcal/mol (gas phase)</p> <p>RE=-29.5 kcal/mol (solvent phase)</p> |

**Figure S1:** Optimized geometries, electronic energies (in a.u.) and relative energies (RE) of radical species **II** and **III** at the B3LYP/6-31G\* level of theory in gas and solvent phase (xylene).

The reaction is initiated with a 1,3-H shift of **5a** leading to the formation of **I** through the transition state, **TS1**, with an activation barrier of 23.20 kcal/mol. At this particular step, elimination of OH·

to form **II**. Further reaction from **II** occurs 1,5 H- shift to form **III** through transition state, **TS2**, with an activation barrier of 22.4 kcal/mol. Whereas radical **III** leads to formation of an 3a elimination of OH- an activation barrier of -18.3 kcal/mol confirm this path id thermodynamically feasible path.

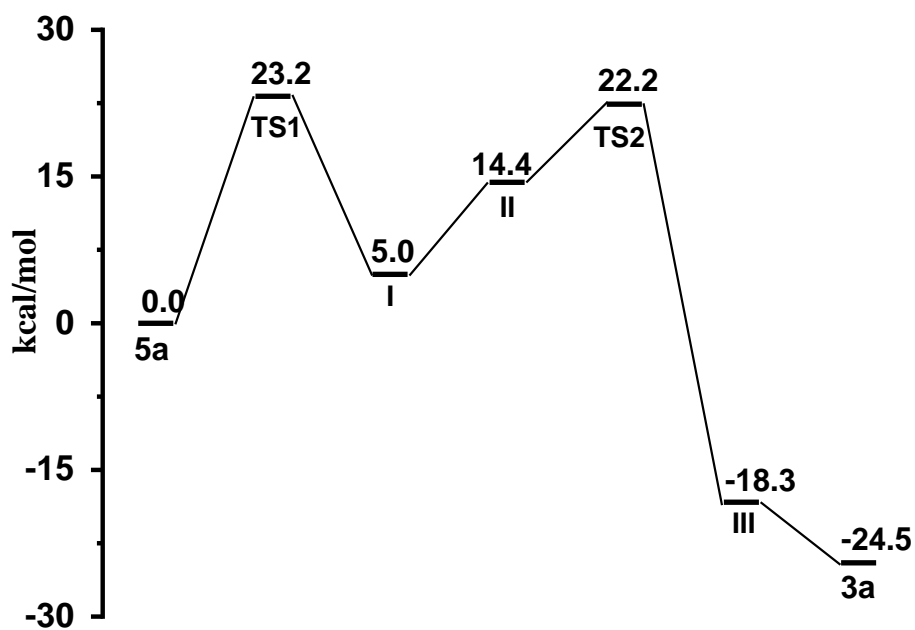

**Figure S2:** Gibbs free energy profile (kcal/mol) obtained at the B3LYP/6-31G\* level of theory in xylene solvent.

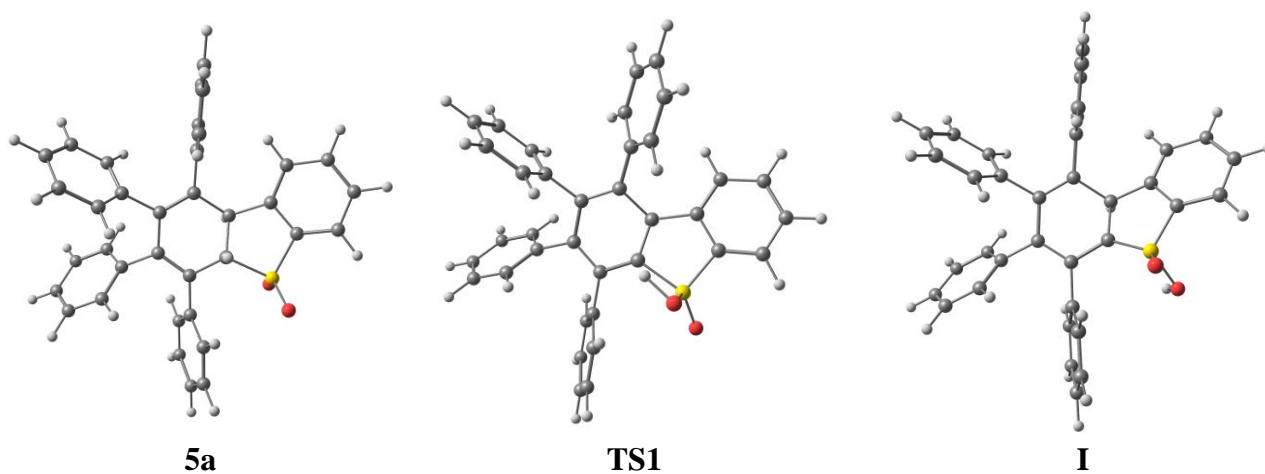

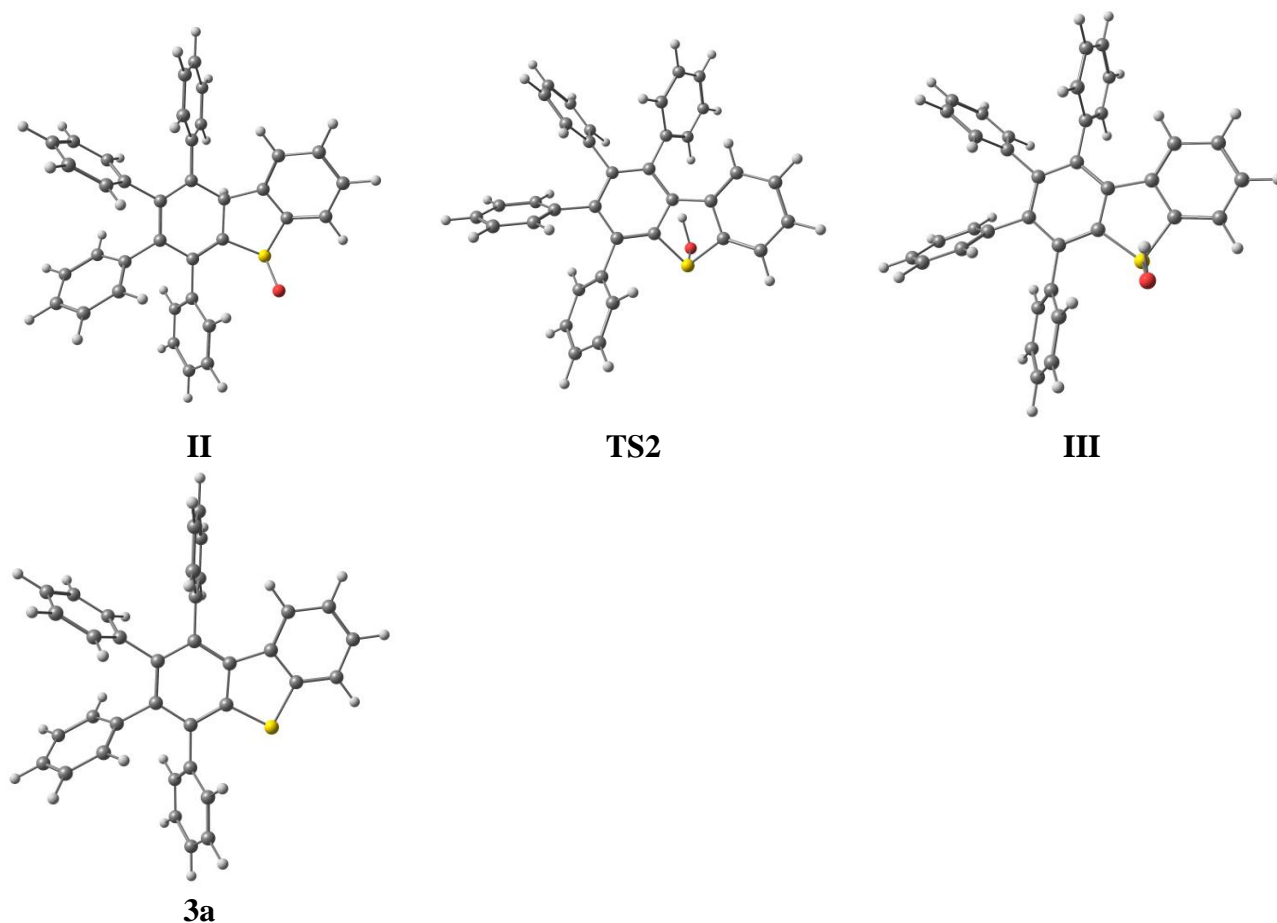

**Figure S3:** Optimized structure of the substrates, transition states and intermediates.

#### **Computational Details:**

In support of experimental study density functional theory (DFT) calculations were carried out using Gaussian 03 program.<sup>1</sup> The ground state geometries of all the studies molecules and intermediates were optimized by DFT at the B3LYP/6-31G\* level of theory.<sup>2,3</sup> All the optimized structures were characterized by a frequency analysis and were shown to be all positive frequencies. All the transition states (TSs) structures were optimized at the same level of theory and presence of one imaginary frequency criteria was used for the characterization of TSs. Furthermore, the intrinsic reaction coordinate (IRC)<sup>4,5</sup> calculations were performed to verify whether the TSs were connected with corresponding two minima (reactant and product). Based on gas phase optimized geometries, a single point calculation was performed in xylene using Polarizable Continuum Model (PCM) for solvent correction. The energy profiles of the reaction



pathways are presented as Gibbs free energy changes ( $\Delta G$ 's) involving zero-point vibrational energy and thermal corrections obtained at 298.15 K and 1 atm pressure.

## References

1. Frisch, M. J.; Trucks, G. W.; Schlegel, H. B.; Scuseria, G. E.; Robb, M. A.; Cheeseman, J. R.; Montgomery, J. A., Jr.; Vreven, T.; Kudin, K. N.; Burant, J. C.; Millam, J. M.; Iyengar, S. S.; Tomasi, J.; Barone, V.; Mennucci, B.; Cossi, M.; Scalmani, G.; Rega, N.; Petersson, G. A.; Nakatsuji, H.; Hada, M.; Ehara, M.; Toyota, K.; Fukuda, R.; Hasegawa, J.; Ishida, M.; Nakajima, T.; Honda, Y.; Kitao, O.; Nakai, H.; Klene, M.; Li, X.; Knox, J. E.; Hratchian, H. P.; Cross, J. B.; Bakken, V.; Adamo, C.; Jaramillo, J.; Gomperts, R.; Stratmann, R. E.; Yazyev, O.; Austin, A. J.; Cammi, R.; Pomelli, C.; Ochterski, J. W.; Ayala, P. Y.; Morokuma, K.; Voth, G. A.; Salvador, P.; Dannenberg, J. J.; Zakrzewski, V. G.; Dapprich, S.; Daniels, A. D.; Strain, M. C.; Farkas, O.; Malick, D. K.; Rabuck, A. D.; Raghavachari, K.; Foresman, J. B.; Ortiz, J. V.; Cui, Q.; Baboul, A. G.; Clifford, S.; Cioslowski, J.; Stefanov, B. B.; Liu, G.; Liashenko, A.; Piskorz, P.; Komaromi, I.; Martin, R. L.; Fox, D. J.; Keith, T.; Al-Laham, M. A.; Peng, C. Y.; Nanayakkara, A.; Challacombe, M.; Gill, P. M. W.; Johnson, B.; Chen, W.; Wong, M. W.; Gonzalez, C.; Pople, J. A. Gaussian 03; Gaussian, Inc.: Wallingford, CT, 2004.
2. A. D. Becke, *J. Chem. Phys.* **1993**, 98, 5648.
3. B. Lee, W. Yang, R. G. Parr, *Phys. Rev. B* **1988**, 37, 785.
4. Gonzalez, C.; Schlegel, H. B. *J. Chem. Phys.* 1989, 90, 2154.
5. Gonzalez, C.; Schlegel, H. B. *J. Phys. Chem.* 1990, 94, 5523.

## 7. Absorption and Emission spectra of representative compounds 3a, 3a', 3a'', 3e, 3f, 3i, 4a, 4c, 4f, 7, 10b & 12

### UV-vis Spectra of 3a, 3a', 3a'', 3e, 3f, 3i, 4a, 4c, 4f, 7, 10b & 12

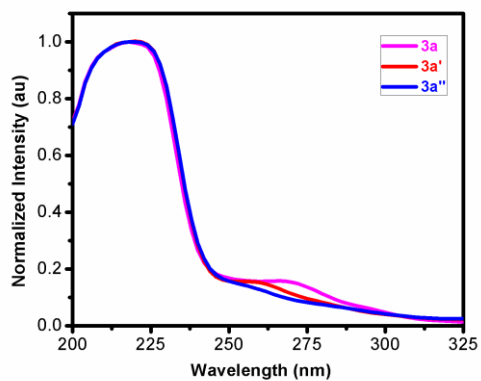

Figure 1a

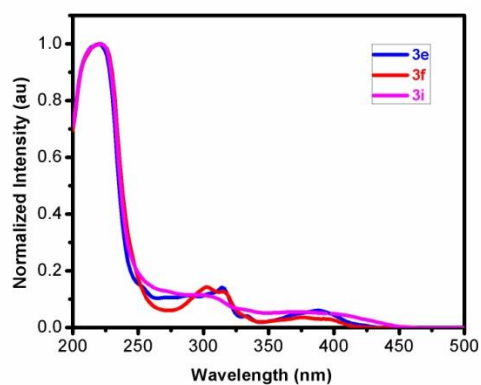

Figure 1b

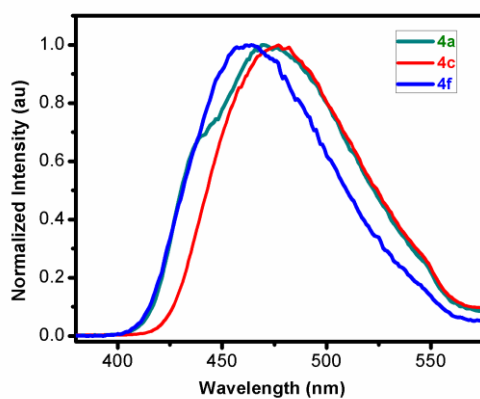

Figure 1c

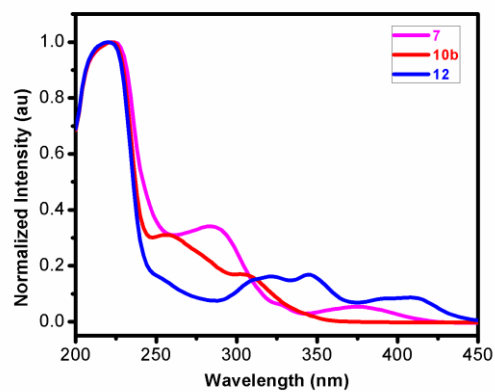

Figure 1d

## Fluorescence Spectra of 3a, 3a', 3a'', 3e, 3f, 3i, 4a, 4c, 4f, 7, 10b & 12

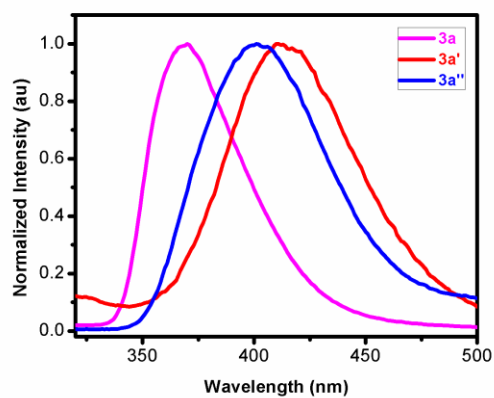

**Figure 2a**

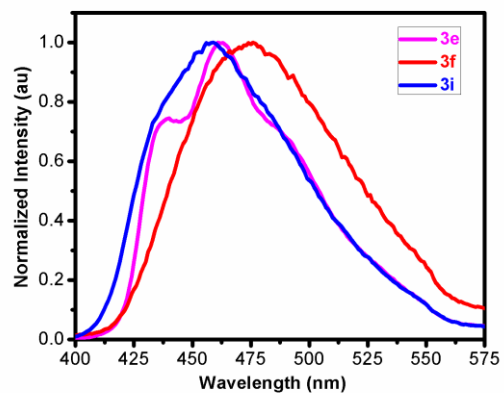

**Figure 2b**

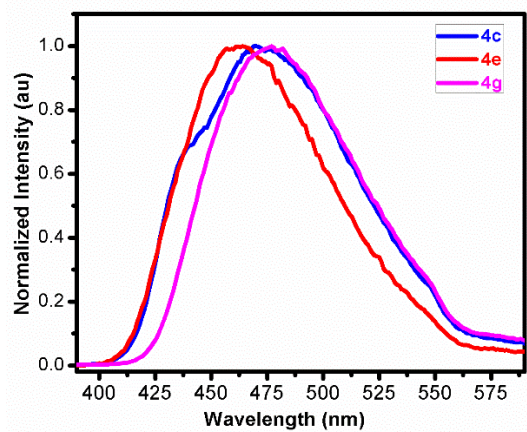

**Figure 2c**

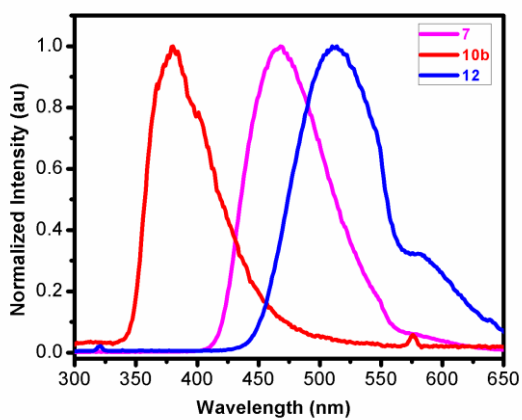

**Figure 2d**

**Table 1: Photophysical data of polycyclic aromatic compounds 3a, 3a', 3a'', 3e, 3f, 3i, 4a, 4c, 4f, 7, 10b & 12**

| entry | product     | absorption <sup>a</sup><br>$\lambda_{\text{max}}$ (abs) (nm) | Emission <sup>a,b</sup><br>$\lambda_{\text{max}}$ (em) (nm) | Stokes <sup>c</sup><br>Shift (cm <sup>-1</sup> ) | Quantum yield<br>( $\phi$ ) <sup>d</sup> |
|-------|-------------|--------------------------------------------------------------|-------------------------------------------------------------|--------------------------------------------------|------------------------------------------|
| 1     | <b>3a</b>   | 218, 266                                                     | 370                                                         | 18845                                            | 0.0146                                   |
| 2     | <b>3e</b>   | 220, 290, 388                                                | 443, 461                                                    | 23763                                            | <b>0.0801</b>                            |
| 3     | <b>3f</b>   | 222, 316, 380                                                | 459                                                         | 23259                                            | 0.0321                                   |
| 4     | <b>3i</b>   | 222, 296                                                     | 476                                                         | 24037                                            | 0.0179                                   |
| 5     | <b>4a</b>   | 220, 304, 402                                                | 470                                                         | 24178                                            | 0.0396                                   |
| 6     | <b>4c</b>   | 220, 296                                                     | 464                                                         | 23903                                            | 0.0214                                   |
| 7     | <b>4f</b>   | 220, 314, 390                                                | 477                                                         | 24490                                            | 0.0268                                   |
| 8     | <b>7</b>    | 222, 256, 302                                                | 380                                                         | 18729                                            | 0.0028                                   |
| 9     | <b>10b</b>  | 224, 284, 376                                                | 468                                                         | 23275                                            | 0.0191                                   |
| 10    | <b>12</b>   | 220, 348, 408                                                | 510, 576                                                    | 25847                                            | 0.0251                                   |
| 11    | <b>3a''</b> | 220                                                          | 401                                                         | 20517                                            | 0.0262                                   |
| 12    | <b>3a'</b>  | 222, 256                                                     | 411, 521                                                    | 20714                                            | 0.0454                                   |

<sup>a</sup>Recorded in EtOH at 25 °C. <sup>b</sup>Excited at the longest wavelength of the absorption maximum. <sup>c</sup>Stokes shift =  $\lambda_{\text{max(abs)}} - \lambda_{\text{max(emi)}}(\text{cm}^{-1})$ . <sup>d</sup>Fluorescence quantum yield was calculated using the anthracene as a standard ( $\Phi_{\text{std}} = 0.29$  in ethanol).

The optical properties of representative dibenzothiophenes (**3a**, **3e**, **3f**, **3i**, **3a''** and **3a'**), triarylfluoranthenes (**4a**, **4c**, **4f** and **10b**) and non-planar heteroacenes (**7** and **12**) were investigated by UV-visible absorption and fluorescence spectroscopy (**Figures 1** and **2**). The absorption spectra of tetraphenyl dibenzothiophene analogues **3a**, **3a''** and **3a'** showed a strong absorption band at around 220 nm due to the  $\pi$ - $\pi^*$  transition. Except **3a''**, the dibenzothiophenes **3a** and **3a'** showed a less intense shoulder peak at ~260 nm due to the  $n$ - $\pi^*$  transition (**Figure 1a**). Acenaphthylene fused dibenzothiophenes **3e**, **3f** and **3i** exhibit one intense and two weak absorptions bands in the region of 200-400 nm owing to the dibenzothiophene and diarylfluoranthene groups (**Figure 1b**). The remaining triarylfluoranthenes **4a**, **4c** and **4f** as well as highly conjugated acenes **7**, **10b** and **12** displayed absorption bands in the region of 200-420 nm (**Figures 1c & 1d**). The fluorescence spectra of tetraphenyl dibenzothiophenes **3a**, **3a''** and **3a'** show broad emission band in the region of 350-475 nm (**Figure 2a**). The dibenzothiophene *S*-oxide **3a'** showed higher emission value



compared to that of thiophene as well as sulfone counterparts (**3a**, **3a''**) possibly due to the higher charge mobility. Further, benzo[*b*]thienofluoranthenes (**3e**, **3f**, **3i**) as well as triarylfluoranthenes (**4a**, **4c**, **4f**) displayed strong emission band in the region of 425-550 nm (**Figures 2b & 2c**). Lastly, the  $\pi$ -extended acenes **7**, **10b** and **12** show (**Figure 2d**) discrete sharp emission peaks from the region of 350 to 600 nm. Relatively, the higher  $\pi$ -conjugation of **12** ensured its longer wavelength emission value than acenes **7** and **10b**.

Among twelve polycyclic aromatic compounds **3a**, **3a'**, **3a''**, **3e**, **3f**, **3i**, **4a**, **4c**, **4f**, **7**, **10b** and **12**, the undecacene **12** show slightly higher stokes shift value (**Table 1**). The oxygenated homologs of tetraphenyl dibenzothiophenes **3a''** and **3a'** exhibited higher quantum efficiency (**Table 1**) than that of the parent dibenzothiophene **3a**. The incorporation of bromine as well as methylenedioxy substituents on acenaphthylene fused dibenzothiophene (**3e**, **3f**, **3i**) decreased the fluorescence quantum yields. The presence of aryl or heteroaryl substituents on fluoranthenes (**4a**, **4c**, **4f**) is not showing any appreciable influence on their quantum yield. Among acenes (**7**, **10b**, **12**), the *N*-hexylcarbazole based undecacene **12** displayed higher quantum yield value (**Table 1**).
